# Supplementary material for: miR-30 Family miRNAs Mediate the Effect of Chronic Social Defeat Stress on Hippocampal Neurogenesis in Mouse Depression Model
Source: PubMed Central journal article supplement (PMC6694739; doi:10.3389/fnmol.2019.00188), 2019-08-08
Supplement: Table_1.pdf [file Table_1.pdf]

**Table S1. List of miRNAs, which demonstrated increased expression (fold change  $\geq 1.2$ ) in the DG of defeated mice when compared with the controls**

| <b><u>Name of the miRNA</u></b> | <b><u>Fold Change</u></b> |
|---------------------------------|---------------------------|
| mmu-let-7c-1-star               | 1.25                      |
| mmu-let-7i                      | 1.26                      |
| mmu-miR-106b                    | 1.46                      |
| mmu-miR-106b-star               | 1.27                      |
| mmu-miR-1195                    | 1.66                      |
| mmu-miR-1198                    | 1.23                      |
| mmu-miR-124-star                | 1.24                      |
| mmu-miR-125a-3p                 | 1.28                      |
| mmu-miR-125b-3p                 | 1.20                      |
| mmu-miR-125b-star               | 1.68                      |
| mmu-miR-127-star                | 1.30                      |
| mmu-miR-128                     | 1.20                      |
| mmu-miR-134                     | 1.31                      |
| mmu-miR-139-3p                  | 1.29                      |
| mmu-miR-152                     | 1.20                      |
| mmu-miR-15a                     | 1.74                      |
| mmu-miR-16                      | 1.23                      |
| mmu-miR-17                      | 1.34                      |
| mmu-miR-17-star                 | 1.79                      |
| mmu-miR-181a-1-star             | 1.26                      |
| mmu-miR-182                     | 1.30                      |
| mmu-miR-187                     | 1.20                      |
| mmu-miR-18a-star                | 1.24                      |
| mmu-miR-191-star                | 1.26                      |
| mmu-miR-193b                    | 1.25                      |
| mmu-miR-194                     | 1.32                      |
| mmu-miR-195                     | 1.29                      |
| mmu-miR-196a-star               | 1.30                      |
| mmu-miR-199a-3p                 | 1.36                      |
| mmu-miR-199a-5p                 | 1.34                      |
| mmu-miR-200a                    | 1.44                      |
| mmu-miR-200b                    | 1.21                      |
| mmu-miR-21                      | 1.29                      |
| mmu-miR-212                     | 1.52                      |
| mmu-miR-214-star                | 1.21                      |
| mmu-miR-21-star                 | 1.47                      |
| mmu-miR-24-2-star               | 1.23                      |
| mmu-miR-27b                     | 1.39                      |
| mmu-miR-28                      | 1.75                      |
| mmu-miR-296-5p                  | 1.35                      |
| mmu-miR-297a-star               | 1.25                      |
| mmu-miR-297c-star               | 1.24                      |
| mmu-miR-298                     | 1.32                      |
| mmu-miR-299                     | 1.45                      |
| mmu-miR-300                     | 1.20                      |
| mmu-miR-30b-star                | 1.26                      |
| mmu-miR-30c-2-star              | 1.50                      |
| mmu-miR-320                     | 1.28                      |
| mmu-miR-324-3p                  | 1.41                      |
| mmu-miR-324-5p                  | 1.23                      |
| mmu-miR-326                     | 1.33                      |
| mmu-miR-328                     | 1.29                      |
| mmu-miR-329                     | 1.46                      |
| mmu-miR-330-star                | 1.22                      |
| mmu-miR-337-5p                  | 1.29                      |
| mmu-miR-342-5p                  | 1.40                      |
| mmu-miR-345-3p                  | 1.49                      |

|                   |      |
|-------------------|------|
| mmu-miR-345-5p    | 1.36 |
| mmu-miR-346       | 1.22 |
| mmu-miR-369-5p    | 1.35 |
| mmu-miR-376b      | 1.38 |
| mmu-miR-376c-star | 1.22 |
| mmu-miR-381       | 1.52 |
| mmu-miR-409-3p    | 1.38 |
| mmu-miR-410       | 2.35 |
| mmu-miR-423-3p    | 1.62 |
| mmu-miR-425       | 1.34 |
| mmu-miR-425-star  | 1.30 |
| mmu-miR-433       | 1.27 |
| mmu-miR-466f-5p   | 1.40 |
| mmu-miR-467d      | 1.21 |
| mmu-miR-467f      | 1.42 |
| mmu-miR-468       | 1.28 |
| mmu-miR-485-star  | 1.47 |
| mmu-miR-497       | 1.71 |
| mmu-miR-532-3p    | 1.35 |
| mmu-miR-540-3p    | 1.22 |
| mmu-miR-574-3p    | 1.20 |
| mmu-miR-574-5p    | 1.32 |
| mmu-miR-592       | 1.40 |
| mmu-miR-652       | 1.29 |
| mmu-miR-666-3p    | 1.64 |
| mmu-miR-666-5p    | 1.94 |
| mmu-miR-667       | 1.59 |
| mmu-miR-668       | 1.38 |
| mmu-miR-669f      | 1.39 |
| mmu-miR-671-5p    | 1.42 |
| mmu-miR-672       | 1.26 |
| mmu-miR-674-star  | 1.23 |
| mmu-miR-685       | 1.55 |
| mmu-miR-690       | 1.23 |
| mmu-miR-698       | 1.27 |
| mmu-miR-707       | 1.42 |
| mmu-miR-720       | 1.64 |
| mmu-miR-743b-3p   | 1.22 |
| mmu-miR-744       | 1.20 |
| mmu-miR-760       | 1.40 |
| mmu-miR-764-5p    | 1.21 |
| mmu-miR-770-5p    | 1.20 |
| mmu-miR-7a-star   | 1.20 |
| mmu-miR-805       | 1.23 |
| mmu-miR-872-star  | 1.59 |
| mmu-miR-874       | 1.31 |
| mmu-miR-875-3p    | 1.23 |
| mmu-miR-92b       | 1.28 |
| mmu-miR-93        | 1.24 |
