# Supplementary material for: miR-30 Family miRNAs Mediate the Effect of Chronic Social Defeat Stress on Hippocampal Neurogenesis in Mouse Depression Model
Source: PubMed Central journal article supplement (PMC6694739; doi:10.3389/fnmol.2019.00188), 2019-08-08
Supplement: Table_2.pdf [file Table_2.pdf]

**Table S2. List of miRNAs, which demonstrated decreased expression (fold change  $\geq 1.2$ ) in the DG of defeated mice when compared with the controls**

| <u>Name of the miRNA</u> | <u>Fold Change</u> |
|--------------------------|--------------------|
| mmu-miR-122              | 0.811              |
| mmu-miR-125a-5p          | 0.819              |
| mmu-miR-125b-5p          | 0.815              |
| mmu-miR-126-3p           | 0.672              |
| mmu-miR-129-3p           | 0.424              |
| mmu-miR-129-5p           | 0.490              |
| mmu-miR-130a             | 0.473              |
| mmu-miR-132              | 0.677              |
| mmu-miR-137              | 0.810              |
| mmu-miR-138-star         | 0.751              |
| mmu-miR-146b             | 0.609              |
| mmu-miR-150-star         | 0.706              |
| mmu-miR-153              | 0.663              |
| mmu-miR-154              | 0.700              |
| mmu-miR-181c             | 0.831              |
| mmu-miR-183-star         | 0.805              |
| mmu-miR-193-star         | 0.738              |
| mmu-miR-203-star         | 0.805              |
| mmu-miR-204              | 0.652              |
| mmu-miR-206              | 0.791              |
| mmu-miR-20a              | 0.468              |
| mmu-miR-20a-star         | 0.759              |
| mmu-miR-218              | 0.826              |
| mmu-miR-219              | 0.796              |
| mmu-miR-25               | 0.820              |
| mmu-miR-26a              | 0.351              |
| mmu-miR-27a-star         | 0.824              |
| mmu-miR-296-3p           | 0.802              |
| mmu-miR-299-star         | 0.699              |
| mmu-miR-29b              | 0.728              |
| mmu-miR-30a              | 0.228              |
| mmu-miR-30a-star         | 0.499              |
| mmu-miR-30b              | 0.253              |
| mmu-miR-30c              | 0.161              |
| mmu-miR-30d              | 0.423              |
| mmu-miR-30e              | 0.255              |
| mmu-miR-30e-star         | 0.710              |
| mmu-miR-322-star         | 0.777              |
| mmu-miR-325-star         | 0.350              |
| mmu-miR-331-5p           | 0.762              |
| mmu-miR-335-5p           | 0.594              |
| mmu-miR-339-5p           | 0.711              |
| mmu-miR-34b-3p           | 0.596              |
| mmu-miR-34c              | 0.639              |
| mmu-miR-34c-star         | 0.397              |
| mmu-miR-351              | 0.613              |
| mmu-miR-361              | 0.661              |
| mmu-miR-362-3p           | 0.825              |
| mmu-miR-362-5p           | 0.818              |
| mmu-miR-380-3p           | 0.754              |
| mmu-miR-380-5p           | 0.818              |
| mmu-miR-411-star         | 0.690              |
| mmu-miR-421              | 0.372              |
| mmu-miR-431              | 0.767              |
| mmu-miR-434-3p           | 0.795              |
| mmu-miR-448              | 0.730              |
| mmu-miR-450b-3p          | 0.826              |
| mmu-miR-466g             | 0.763              |

|                  |       |
|------------------|-------|
| mmu-miR-466i     | 0.790 |
| mmu-miR-470-star | 0.833 |
| mmu-miR-483      | 0.814 |
| mmu-miR-490      | 0.772 |
| mmu-miR-493      | 0.731 |
| mmu-miR-495      | 0.684 |
| mmu-miR-501-5p   | 0.806 |
| mmu-miR-539      | 0.697 |
| mmu-miR-541      | 0.409 |
| mmu-miR-542-5p   | 0.626 |
| mmu-miR-551b     | 0.782 |
| mmu-miR-669c     | 0.765 |
| mmu-miR-673-3p   | 0.808 |
| mmu-miR-684      | 0.702 |
| mmu-miR-691      | 0.782 |
| mmu-miR-708      | 0.424 |
| mmu-miR-721      | 0.764 |
| mmu-miR-743a     | 0.826 |
| mmu-miR-744-star | 0.641 |
| mmu-miR-759      | 0.799 |
| mmu-miR-764-3p   | 0.781 |
| mmu-miR-883a-5p  | 0.768 |
| mmu-miR-9        | 0.679 |
| mmu-miR-9-star   | 0.281 |
