# Supplementary material for: miR-30 Family miRNAs Mediate the Effect of Chronic Social Defeat Stress on Hippocampal Neurogenesis in Mouse Depression Model
Source: PubMed Central journal article supplement (PMC6694739; doi:10.3389/fnmol.2019.00188), 2019-08-08
Supplement: Table_3.pdf [file Table_3.pdf]

**Table S3. List of genes, which demonstrated increased expression (fold change  $\geq 1.2$  and  $p \leq 0.05$ ) in the DG of defeated mice when compared with the controls.**

| <b>Gene Symbol</b> | <b>Ensembl Id</b>   | <b>Gene Name</b>                                                                             | <b>Fold Change</b> |
|--------------------|---------------------|----------------------------------------------------------------------------------------------|--------------------|
| 1500001M20Rik      | ENSMUSG00000030316  | RIKEN cDNA 1500001M20 gene                                                                   | 1.65               |
| 1600014C10Rik      | ENSMUSG00000054676  | RIKEN cDNA 1600014C10 gene                                                                   | 1.30               |
| 1700029115Rik      | ENSMUSG00000044916  | RIKEN cDNA 1700029115 gene                                                                   | 1.22               |
| 1810062G17Rik      | ENSMUSG00000027713  | RIKEN cDNA 1810062G17 gene                                                                   | 1.31               |
| 1810063B05Rik      | ENSMUSG00000051671  | RIKEN cDNA 1810063B05 gene                                                                   | 1.59               |
| 2410017117Rik      | ENSMUSG00000038311  | RIKEN cDNA 2410017117 gene                                                                   | 1.23               |
| 4632419I22Rik      | ENSMUSG00000085208  | RIKEN cDNA 4632419I22 gene                                                                   | 1.33               |
| 4921517D22Rik      | ENSMUSG00000049902  | RIKEN cDNA 4921517D22 gene                                                                   | 1.23               |
| 4930402F06Rik      | ENSMUSG00000079421  | RIKEN cDNA 4930402F06 gene                                                                   | 1.25               |
| 4930430A15Rik      | ENSMUSG00000027157  | RIKEN cDNA 4930430A15 gene                                                                   | 1.28               |
| 4930432M17Rik      | ENSMUSG00000074248  | RIKEN cDNA 4930432M17 gene                                                                   | 1.26               |
| 4930433N12Rik      | ENSMUSG00000042360  | RIKEN cDNA 4930433N12 gene                                                                   | 1.89               |
| 4930526D03Rik      | ENSMUSG00000045794  | RIKEN cDNA 4930526D03 gene                                                                   | 1.27               |
| 4931428L18Rik      | ENSMUSG00000086727  | RIKEN cDNA 4931428L18 gene                                                                   | 1.22               |
| 4933404M02Rik      | ENSMUSG00000075302  | RIKEN cDNA 4933404M02 gene                                                                   | 1.41               |
| 5330438D12Rik      | ENSMUSG00000052291  | RIKEN cDNA 5330438D12 gene                                                                   | 1.47               |
| 5430419D17Rik      | ENSMUSG00000006204  | RIKEN cDNA 5430419D17 gene                                                                   | 1.25               |
| 5730577I03Rik      | ENSMUSG00000062470  | RIKEN cDNA 5730577I03 gene                                                                   | 1.34               |
| 5S_rRNA            | ENSMUSG000000075790 | 5S ribosomal RNA                                                                             | 1.24               |
| 6030498E09Rik      | ENSMUSG00000051361  | RIKEN cDNA 6030498E09 gene                                                                   | 1.43               |
| 6330409D20Rik      | ENSMUSG00000009551  | RIKEN cDNA 6330409D20 gene                                                                   | 1.52               |
| 9030617O03Rik      | ENSMUSG00000021185  | RIKEN cDNA 9030617O03 gene                                                                   | 1.21               |
| 9230020A06Rik      | ENSMUSG00000072753  | RIKEN cDNA 9230020A06 gene                                                                   | 1.33               |
| 9330158H04Rik      | ENSMUSG00000073154  | RIKEN cDNA 9330158H04 gene                                                                   | 1.54               |
| Aars2              | ENSMUSG00000023938  | alanyl-tRNA synthetase 2, mitochondrial (putative)                                           | 2.42               |
| Abca14             | ENSMUSG00000062017  | ATP-binding cassette, sub-family A (ABC1), member 14                                         | 1.52               |
| Abca9              | ENSMUSG00000041797  | ATP-binding cassette, sub-family A (ABC1), member 9                                          | 1.28               |
| Abcb1a             | ENSMUSG00000040584  | ATP-binding cassette, sub-family B (MDR/TAP), member 1A                                      | 1.25               |
| Abcc12             | ENSMUSG00000036872  | ATP-binding cassette, sub-family C (CFTR/MRP), member 12                                     | 1.42               |
| Abhd8              | ENSMUSG00000007950  | abhydrolase domain containing 8                                                              | 1.25               |
| AC141881.2         | ENSMUSG00000092783  |                                                                                              | 1.24               |
| Ace2               | ENSMUSG00000015405  | angiotensin I converting enzyme (peptidyl-dipeptidase A) 2                                   | 1.22               |
| Ace3               | ENSMUSG00000087418  | angiotensin I converting enzyme (peptidyl-dipeptidase A) 3                                   | 1.93               |
| Acer2              | ENSMUSG00000038007  | alkaline ceramidase 2                                                                        | 1.90               |
| Acnat2             | ENSMUSG00000060317  | acyl-coenzyme A amino acid N-acyltransferase 2                                               | 1.36               |
| Acvr2a             | ENSMUSG00000052155  | activin receptor IIA                                                                         | 1.24               |
| Acvr11             | ENSMUSG00000000530  | activin A receptor, type II-like 1                                                           | 1.48               |
| Adam32             | ENSMUSG00000037437  | a disintegrin and metallopeptidase domain 32                                                 | 1.52               |
| Adam7              | ENSMUSG00000022056  | a disintegrin and metallopeptidase domain 7                                                  | 1.50               |
| Adams7             | ENSMUSG00000032363  | a disintegrin-like and metallopeptidase (repolysin type) with thrombospondin type 1 motif, 7 | 1.59               |
| Adm                | ENSMUSG00000030790  | adrenomedullin                                                                               | 1.34               |
| AF357428           | ENSMUSG00000065749  | snoRNA AF357428                                                                              | 1.26               |
| Agpat2             | ENSMUSG00000026922  | 1-acylglycerol-3-phosphate O-acyltransferase 2 (lysophosphatidic acid acyltransferase, beta) | 1.22               |
| Agxt               | ENSMUSG00000026272  | alanine-glyoxylate aminotransferase                                                          | 1.27               |
| Al324046           | ENSMUSG00000076615  | expressed sequence Al324046                                                                  | 2.02               |
| Al607873           | ENSMUSG00000073490  | expressed sequence Al607873                                                                  | 1.24               |
| Aif1               | ENSMUSG00000024397  | allograft inflammatory factor 1                                                              | 1.38               |
| Akr1c6             | ENSMUSG00000021210  | aldo-keto reductase family 1, member C6                                                      | 1.27               |
| Aldob              | ENSMUSG00000028307  | aldolase B, fructose-bisphosphate                                                            | 1.37               |
| Alox12e            | ENSMUSG00000018907  | arachidonate lipoxygenase, epidermal                                                         | 1.46               |
| Aloxe3             | ENSMUSG00000020892  | arachidonate lipoxygenase 3                                                                  | 1.24               |
| Ambp               | ENSMUSG00000028356  | alpha 1 microglobulin/bikunin                                                                | 1.39               |
| Anxa2              | ENSMUSG00000032231  | annexin A2                                                                                   | 1.69               |
| Apoa1              | ENSMUSG00000032083  | apolipoprotein A-I                                                                           | 1.28               |
| Apod               | ENSMUSG00000022548  | apolipoprotein D                                                                             | 1.28               |
| Apold1             | ENSMUSG00000090698  | apolipoprotein L domain containing 1                                                         | 1.25               |
| Arc                | ENSMUSG00000022602  | activity regulated cytoskeletal-associated protein                                           | 1.41               |
| Arhgef19           | ENSMUSG00000028919  | Rho guanine nucleotide exchange factor (GEF) 19                                              | 1.36               |
| Arl13b             | ENSMUSG00000022911  | ADP-ribosylation factor-like 13B                                                             | 1.33               |

|                      |                     |                                                                              |      |
|----------------------|---------------------|------------------------------------------------------------------------------|------|
| <i>Arpc1b</i>        | ENSMUSG00000029622  | actin related protein 2/3 complex, subunit 1B                                | 1.26 |
| <i>Arpc5</i>         | ENSMUSG00000008475  | actin related protein 2/3 complex, subunit 5                                 | 1.56 |
| <i>Art3</i>          | ENSMUSG00000034842  | ADP-ribosyltransferase 3                                                     | 1.64 |
| <i>Atp10d</i>        | ENSMUSG00000046808  | ATPase, class V, type 10D                                                    | 1.29 |
| <i>B2m</i>           | ENSMUSG00000060802  | beta-2 microglobulin                                                         | 1.25 |
| <i>BC051665</i>      | ENSMUSG00000042243  | cDNA sequence BC051665                                                       | 1.29 |
| <i>Bin2</i>          | ENSMUSG00000075411  | bridging integrator 2                                                        | 1.29 |
| <i>Bnc2</i>          | ENSMUSG00000028487  | basonuclin 2                                                                 | 1.28 |
| <i>Brix1</i>         | ENSMUSG00000022247  | BRX1, biogenesis of ribosomes, homolog (S. cerevisiae)                       | 1.26 |
| <i>Bst1</i>          | ENSMUSG00000029082  | bone marrow stromal cell antigen 1                                           | 1.41 |
| <i>C1qa</i>          | ENSMUSG00000036887  | complement component 1, q subcomponent, alpha polypeptide                    | 1.99 |
| <i>C1qb</i>          | ENSMUSG00000036905  | complement component 1, q subcomponent, beta polypeptide                     | 1.50 |
| <i>C1qc</i>          | ENSMUSG00000036896  | complement component 1, q subcomponent, C chain                              | 1.34 |
| <i>C1qtnf6</i>       | ENSMUSG00000022440  | C1q and tumor necrosis factor related protein 6                              | 1.51 |
| <i>C330013J21Rik</i> | ENSMUSG00000074529  | RIKEN cDNA C330013J21 gene                                                   | 1.55 |
| <i>C3ar1</i>         | ENSMUSG00000040552  | complement component 3a receptor 1                                           | 1.38 |
| <i>C4a</i>           | ENSMUSG00000015451  | complement component 4A (Rodgers blood group)                                | 1.59 |
| <i>C5ar1</i>         | ENSMUSG00000049130  | complement component 5a receptor 1                                           | 1.54 |
| <i>Capn11</i>        | ENSMUSG00000058626  | calpain 11                                                                   | 1.42 |
| <i>Casp4</i>         | ENSMUSG00000033538  | caspase 4, apoptosis-related cysteine peptidase                              | 1.36 |
| <i>Cbr2</i>          | ENSMUSG00000025150  | carbonyl reductase 2                                                         | 1.34 |
| <i>Ccdc120</i>       | ENSMUSG000000031150 | coiled-coil domain containing 120                                            | 1.28 |
| <i>Ccdc13</i>        | ENSMUSG000000079235 | coiled-coil domain containing 13                                             | 1.46 |
| <i>Ccdc135</i>       | ENSMUSG000000031786 | coiled-coil domain containing 135                                            | 1.34 |
| <i>Ccdc136</i>       | ENSMUSG00000029769  | coiled-coil domain containing 136                                            | 1.32 |
| <i>Cckar</i>         | ENSMUSG00000029193  | cholecystokinin A receptor                                                   | 1.22 |
| <i>Ccr1</i>          | ENSMUSG00000025804  | chemokine (C-C motif) receptor 1                                             | 1.24 |
| <i>Cd300ld</i>       | ENSMUSG00000034641  | CD300 molecule-like family member d                                          | 1.30 |
| <i>Cd86</i>          | ENSMUSG00000022901  | CD86 antigen                                                                 | 1.33 |
| <i>Cd93</i>          | ENSMUSG00000027435  | CD93 antigen                                                                 | 1.42 |
| <i>Cdc42bpg</i>      | ENSMUSG000000024769 | CDC42 binding protein kinase gamma (DMPK-like)                               | 1.64 |
| <i>Cdkn1a</i>        | ENSMUSG00000023067  | cyclin-dependent kinase inhibitor 1A (P21)                                   | 1.68 |
| <i>Ceacam2</i>       | ENSMUSG00000054385  | carcinoembryonic antigen-related cell adhesion molecule 2                    | 1.42 |
| <i>Cfh</i>           | ENSMUSG00000026365  | complement component factor h                                                | 1.24 |
| <i>Cfp</i>           | ENSMUSG00000001128  | complement factor properdin                                                  | 1.29 |
| <i>Ch25h</i>         | ENSMUSG00000050370  | cholesterol 25-hydroxylase                                                   | 1.23 |
| <i>Chst4</i>         | ENSMUSG00000035930  | carbohydrate (chondroitin 6/keratan) sulfotransferase 4                      | 1.26 |
| <i>Cish</i>          | ENSMUSG00000032578  | cytokine inducible SH2-containing protein                                    | 1.22 |
| <i>Clec2h</i>        | ENSMUSG00000030364  | C-type lectin domain family 2, member h                                      | 1.32 |
| <i>Clec4a3</i>       | ENSMUSG00000043832  | C-type lectin domain family 4, member a3                                     | 1.31 |
| <i>Cnga4</i>         | ENSMUSG00000030897  | cyclic nucleotide gated channel alpha 4                                      | 1.22 |
| <i>Cp</i>            | ENSMUSG00000003617  | ceruloplasmin                                                                | 1.48 |
| <i>Crip3</i>         | ENSMUSG00000023968  | cysteine-rich protein 3                                                      | 1.44 |
| <i>Csf3r</i>         | ENSMUSG00000028859  | colony stimulating factor 3 receptor (granulocyte)                           | 1.45 |
| <i>Csk</i>           | ENSMUSG00000032312  | c-src tyrosine kinase                                                        | 1.20 |
| <i>Cst9</i>          | ENSMUSG00000027445  | cystatin 9                                                                   | 1.22 |
| <i>Ctla2a</i>        | ENSMUSG00000044258  | cytotoxic T lymphocyte-associated protein 2 alpha                            | 1.76 |
| <i>Ctla2b</i>        | ENSMUSG00000074874  | cytotoxic T lymphocyte-associated protein 2 beta                             | 1.30 |
| <i>Ctr9</i>          | ENSMUSG00000005609  | Ctr9, Paf1/RNA polymerase II complex component, homolog (S. cerevisiae)      | 1.45 |
| <i>Ctsc</i>          | ENSMUSG00000030560  | cathepsin C                                                                  | 1.41 |
| <i>Ctsh</i>          | ENSMUSG00000032359  | cathepsin H                                                                  | 1.35 |
| <i>Ctss</i>          | ENSMUSG00000038642  | cathepsin S                                                                  | 1.34 |
| <i>Ctsz</i>          | ENSMUSG00000016256  | cathepsin Z                                                                  | 1.21 |
| <i>Cwh43</i>         | ENSMUSG00000029154  | cell wall biogenesis 43 C-terminal homolog (S. cerevisiae)                   | 1.32 |
| <i>Cyp2c70</i>       | ENSMUSG00000060613  | cytochrome P450, family 2, subfamily c, polypeptide 70                       | 1.42 |
| <i>Cyrr1</i>         | ENSMUSG00000041134  | cysteine and tyrosine-rich protein 1                                         | 1.34 |
| <i>Darc</i>          | ENSMUSG00000037872  | Duffy blood group, chemokine receptor                                        | 1.45 |
| <i>Dcun1d3</i>       | ENSMUSG00000048787  | DCN1, defective in cullin neddylation 1, domain containing 3 (S. cerevisiae) | 1.34 |
| <i>Ddit4l</i>        | ENSMUSG00000046818  | DNA-damage-inducible transcript 4-like                                       | 1.61 |
| <i>Dennd1b</i>       | ENSMUSG00000056268  | DENN/MADD domain containing 1B                                               | 1.27 |
| <i>Dennd4a</i>       | ENSMUSG00000053641  | DENN/MADD domain containing 4A                                               | 1.21 |
| <i>Dhx8</i>          | ENSMUSG00000034931  | DEAH (Asp-Glu-Ala-His) box polypeptide 8                                     | 1.23 |
| <i>Diap1</i>         | ENSMUSG00000024456  | diaphanous homolog 1 (Drosophila)                                            | 1.20 |

|                      |                     |                                                                                    |      |
|----------------------|---------------------|------------------------------------------------------------------------------------|------|
| <i>Dlx5</i>          | ENSMUSG00000029755  | distal-less homeobox 5                                                             | 1.26 |
| <i>Dnase1</i>        | ENSMUSG00000005980  | deoxyribonuclease I                                                                | 1.26 |
| <i>Dnase111</i>      | ENSMUSG00000019088  | deoxyribonuclease 1-like 1                                                         | 1.53 |
| <i>Dtx2</i>          | ENSMUSG00000004947  | deltex 2 homolog (Drosophila)                                                      | 1.25 |
| <i>Duox2</i>         | ENSMUSG00000068452  | dual oxidase 2                                                                     | 1.40 |
| <i>Dusp1</i>         | ENSMUSG000000024190 | dual specificity phosphatase 1                                                     | 1.24 |
| <i>E030010A14Rik</i> | ENSMUSG00000048572  | RIKEN cDNA E030010A14 gene                                                         | 1.41 |
| <i>E2f1</i>          | ENSMUSG00000027490  | E2F transcription factor 1                                                         | 1.31 |
| <i>E430018J23Rik</i> | ENSMUSG00000078580  | RIKEN cDNA E430018J23 gene                                                         | 1.20 |
| <i>Echs1</i>         | ENSMUSG00000025465  | enoyl Coenzyme A hydratase, short chain, 1, mitochondrial                          | 1.31 |
| <i>Eltf1</i>         | ENSMUSG00000039167  | EGF, latrophilin seven transmembrane domain containing 1                           | 1.42 |
| <i>Eng</i>           | ENSMUSG00000026814  | endoglin                                                                           | 1.26 |
| <i>Esam</i>          | ENSMUSG00000001946  | endothelial cell-specific adhesion molecule                                        | 1.34 |
| <i>Esr1</i>          | ENSMUSG00000019768  | estrogen receptor 1 (alpha)                                                        | 1.39 |
| <i>Esyt1</i>         | ENSMUSG00000025366  | extended synaptotagmin-like protein 1                                              | 1.32 |
| <i>Fam107a</i>       | ENSMUSG00000021750  | family with sequence similarity 107, member A                                      | 1.22 |
| <i>Fam114a1</i>      | ENSMUSG00000029185  | family with sequence similarity 114, member A1                                     | 1.27 |
| <i>Fam167a</i>       | ENSMUSG00000035095  | family with sequence similarity 167, member A                                      | 1.46 |
| <i>Fam3a</i>         | ENSMUSG00000031399  | family with sequence similarity 3, member A                                        | 1.21 |
| <i>Fas</i>           | ENSMUSG00000024778  | Fas (TNF receptor superfamily member 6)                                            | 1.33 |
| <i>FasL</i>          | ENSMUSG00000000817  | Fas ligand (TNF superfamily, member 6)                                             | 1.35 |
| <i>Fbxl20</i>        | ENSMUSG00000020883  | F-box and leucine-rich repeat protein 20                                           | 1.29 |
| <i>Fcer1g</i>        | ENSMUSG00000058715  | Fc receptor, IgE, high affinity I, gamma polypeptide                               | 1.50 |
| <i>Fcgr2b</i>        | ENSMUSG00000026656  | Fc receptor, IgG, low affinity IIb                                                 | 1.51 |
| <i>Fcgr3</i>         | ENSMUSG00000059498  | Fc receptor, IgG, low affinity III                                                 | 1.41 |
| <i>Fcrls</i>         | ENSMUSG00000015852  | Fc receptor-like S, scavenger receptor                                             | 1.24 |
| <i>Ffar2</i>         | ENSMUSG00000051314  | free fatty acid receptor 2                                                         | 1.41 |
| <i>Fgd5</i>          | ENSMUSG00000034037  | FYVE, RhoGEF and PH domain containing 5                                            | 1.22 |
| <i>Fgg</i>           | ENSMUSG00000033860  | fibrinogen gamma chain                                                             | 1.26 |
| <i>Flg</i>           | ENSMUSG00000092163  | filaggrin                                                                          | 1.49 |
| <i>Fn1</i>           | ENSMUSG00000026193  | fibronectin 1                                                                      | 1.40 |
| <i>Frem1</i>         | ENSMUSG00000059049  | Fras1 related extracellular matrix protein 1                                       | 1.36 |
| <i>Fut9</i>          | ENSMUSG00000055373  | fucosyltransferase 9                                                               | 1.20 |
| <i>Fxyd5</i>         | ENSMUSG00000009687  | FXFD domain-containing ion transport regulator 5                                   | 1.51 |
| <i>Galnt2</i>        | ENSMUSG00000089704  | UDP-N-acetyl-alpha-D-galactosamine:polypeptide N-acetylgalactosaminyltransferase 2 | 1.44 |
| <i>Gbp7</i>          | ENSMUSG00000040253  | guanylate binding protein 7                                                        | 1.23 |
| <i>Gdpc3</i>         | ENSMUSG00000030703  | glycerophosphodiester phosphodiesterase domain containing 3                        | 1.25 |
| <i>Gga2</i>          | ENSMUSG00000030872  | golgi associated, gamma adaptin ear containing, ARF binding protein 2              | 1.33 |
| <i>Gjc1</i>          | ENSMUSG00000034520  | gap junction protein, gamma 1                                                      | 1.27 |
| <i>Gls2</i>          | ENSMUSG00000044005  | glutaminase 2 (liver, mitochondrial)                                               | 1.24 |
| <i>Gm11428</i>       | ENSMUSG000000069792 | predicted gene 11428                                                               | 2.34 |
| <i>Gm11517</i>       | ENSMUSG000000081249 | predicted gene 11517                                                               | 1.32 |
| <i>Gm12830</i>       | ENSMUSG000000055198 | predicted gene 12830                                                               | 1.32 |
| <i>Gm13103</i>       | ENSMUSG000000029451 | predicted gene 13103                                                               | 1.65 |
| <i>Gm13364</i>       | ENSMUSG000000085942 | predicted gene 13364                                                               | 1.33 |
| <i>Gm14115</i>       | ENSMUSG000000081971 | predicted gene 14115                                                               | 1.37 |
| <i>Gm14781</i>       | ENSMUSG000000064129 | predicted gene 14781                                                               | 1.74 |
| <i>Gm14926</i>       | ENSMUSG000000081587 | predicted gene 14926                                                               | 1.26 |
| <i>Gm15368</i>       | ENSMUSG000000081488 | predicted gene 15368                                                               | 1.83 |
| <i>Gm16378</i>       | ENSMUSG000000074046 | predicted gene 16378                                                               | 1.29 |
| <i>Gm16519</i>       | ENSMUSG000000066983 | predicted gene, 16519                                                              | 1.20 |
| <i>Gm20489</i>       | ENSMUSG000000092463 | predicted gene 20489                                                               | 1.65 |
| <i>Gm20547</i>       | ENSMUSG000000092511 | predicted gene 20547                                                               | 1.36 |
| <i>Gm41</i>          | ENSMUSG000000080069 | predicted pseudogene 41                                                            | 1.27 |
| <i>Gm5637</i>        | ENSMUSG00000046993  | predicted pseudogene 5637                                                          | 1.23 |
| <i>Gm5678</i>        | ENSMUSG000000082815 | predicted gene 5678                                                                | 1.21 |
| <i>Gm5941</i>        | ENSMUSG000000071726 | predicted gene 5941                                                                | 1.23 |
| <i>Gm6132</i>        | ENSMUSG000000069200 | predicted pseudogene 6132                                                          | 1.30 |
| <i>Gm7665</i>        | ENSMUSG000000063628 | predicted pseudogene 7665                                                          | 1.46 |
| <i>Gm7676</i>        | ENSMUSG000000068631 | predicted gene 7676                                                                | 2.05 |
| <i>Gm9934</i>        | ENSMUSG000000054061 | predicted gene 9934                                                                | 1.32 |
| <i>Gpnmb</i>         | ENSMUSG00000029816  | glycoprotein (transmembrane) nmb                                                   | 1.30 |
| <i>Grip2</i>         | ENSMUSG00000030098  | glutamate receptor interacting protein 2                                           | 1.25 |

|                  |                     |                                                                                   |      |
|------------------|---------------------|-----------------------------------------------------------------------------------|------|
| <i>Grm2</i>      | ENSMUSG00000023192  | glutamate receptor, metabotropic 2                                                | 1.24 |
| <i>Gsdma2</i>    | ENSMUSG00000017211  | gasdermin A2                                                                      | 1.97 |
| <i>Gsn</i>       | ENSMUSG00000026879  | gelsolin                                                                          | 1.34 |
| <i>Gylt1b</i>    | ENSMUSG00000040434  | glycosyltransferase-like 1B                                                       | 1.29 |
| <i>Gypc</i>      | ENSMUSG00000090523  | glycophorin C                                                                     | 1.40 |
| <i>Gys2</i>      | ENSMUSG00000030244  | glycogen synthase 2                                                               | 1.40 |
| <i>Gzmc</i>      | ENSMUSG00000079186  | granzyme C                                                                        | 1.25 |
| <i>H2-K1</i>     | ENSMUSG00000061232  | histocompatibility 2, K1, K region                                                | 1.84 |
| <i>H2-T22</i>    | ENSMUSG00000056116  | histocompatibility 2, T region locus 22                                           | 1.47 |
| <i>H47</i>       | ENSMUSG00000075701  | histocompatibility 47                                                             | 1.25 |
| <i>Hba-a1</i>    | ENSMUSG00000069919  | hemoglobin alpha, adult chain 1                                                   | 1.30 |
| <i>Hba-a2</i>    | ENSMUSG00000069917  | hemoglobin alpha, adult chain 2                                                   | 1.28 |
| <i>Hbb-b1</i>    | ENSMUSG00000052305  | hemoglobin, beta adult major chain                                                | 1.63 |
| <i>Hbb-b2</i>    | ENSMUSG00000073940  | hemoglobin, beta adult minor chain                                                | 1.63 |
| <i>Hcfc1</i>     | ENSMUSG000000031386 | host cell factor C1                                                               | 1.21 |
| <i>Hdac11</i>    | ENSMUSG00000034245  | histone deacetylase 11                                                            | 1.39 |
| <i>Herc6</i>     | ENSMUSG00000029798  | hect domain and RLD 6                                                             | 1.30 |
| <i>Hist1h2ap</i> | ENSMUSG00000069304  | histone cluster 1, H2ap                                                           | 1.26 |
| <i>Hist1h3f</i>  | ENSMUSG00000059309  | histone cluster 1, H3f                                                            | 1.36 |
| <i>Hist2h2bb</i> | ENSMUSG00000050936  | histone cluster 2, H2bb                                                           | 1.21 |
| <i>Hist2h3c2</i> | ENSMUSG00000081058  | histone cluster 2, H3c2                                                           | 1.37 |
| <i>Hnmpf</i>     | ENSMUSG00000042079  | heterogeneous nuclear ribonucleoprotein F                                         | 2.33 |
| <i>Hoxa7</i>     | ENSMUSG00000038236  | homeobox A7                                                                       | 1.52 |
| <i>Hpd</i>       | ENSMUSG00000029445  | 4-hydroxyphenylpyruvic acid dioxygenase                                           | 1.40 |
| <i>Hpn</i>       | ENSMUSG00000001249  | hepsin                                                                            | 1.25 |
| <i>Icam4</i>     | ENSMUSG00000001014  | intercellular adhesion molecule 4, Landsteiner-Wiener blood group                 | 1.37 |
| <i>Ier3</i>      | ENSMUSG00000003541  | immediate early response 3                                                        | 1.38 |
| <i>Ifi30</i>     | ENSMUSG000000031838 | interferon gamma inducible protein 30                                             | 1.40 |
| <i>Ifih1</i>     | ENSMUSG00000026896  | interferon induced with helicase C domain 1                                       | 1.33 |
| <i>Ifit1</i>     | ENSMUSG00000034459  | interferon-induced protein with tetratricopeptide repeats 1                       | 1.59 |
| <i>Ifit3</i>     | ENSMUSG00000074896  | interferon-induced protein with tetratricopeptide repeats 3                       | 1.40 |
| <i>Ifitm1</i>    | ENSMUSG00000025491  | interferon induced transmembrane protein 1                                        | 1.66 |
| <i>Ifitm2</i>    | ENSMUSG00000060591  | interferon induced transmembrane protein 2                                        | 1.48 |
| <i>Ifitm3</i>    | ENSMUSG00000025492  | interferon induced transmembrane protein 3                                        | 2.09 |
| <i>Ifitm6</i>    | ENSMUSG00000059108  | interferon induced transmembrane protein 6                                        | 1.62 |
| <i>Ifnb1</i>     | ENSMUSG00000048806  | interferon beta 1, fibroblast                                                     | 1.23 |
| <i>Ifne</i>      | ENSMUSG00000045364  | interferon epsilon                                                                | 1.44 |
| <i>Ifngr1</i>    | ENSMUSG00000020009  | interferon gamma receptor 1                                                       | 1.21 |
| <i>Ifit2</i>     | ENSMUSG00000016637  | intraflagellar transport 27 homolog (Chlamydomonas)                               | 1.32 |
| <i>Igfbp6</i>    | ENSMUSG00000023046  | insulin-like growth factor binding protein 6                                      | 1.35 |
| <i>Igfbp7</i>    | ENSMUSG00000036256  | insulin-like growth factor binding protein 7                                      | 2.00 |
| <i>Igj</i>       | ENSMUSG00000067149  | immunoglobulin joining chain                                                      | 1.42 |
| <i>Il15ra</i>    | ENSMUSG00000023206  | interleukin 15 receptor, alpha chain                                              | 1.74 |
| <i>Il17rc</i>    | ENSMUSG00000030281  | interleukin 17 receptor C                                                         | 1.35 |
| <i>Il18bp</i>    | ENSMUSG00000070427  | interleukin 18 binding protein                                                    | 1.28 |
| <i>Il28b</i>     | ENSMUSG00000060747  | interleukin 28B                                                                   | 1.39 |
| <i>Il34</i>      | ENSMUSG000000031750 | interleukin 34                                                                    | 1.27 |
| <i>Ipo11</i>     | ENSMUSG00000078933  | importin 11                                                                       | 1.65 |
| <i>Irak3</i>     | ENSMUSG00000020227  | interleukin-1 receptor-associated kinase 3                                        | 1.36 |
| <i>Irf2bp1</i>   | ENSMUSG00000044030  | interferon regulatory factor 2 binding protein 1                                  | 1.25 |
| <i>Irf8</i>      | ENSMUSG00000041515  | interferon regulatory factor 8                                                    | 1.43 |
| <i>Irgm1</i>     | ENSMUSG00000046879  | immunity-related GTPase family M member 1                                         | 1.50 |
| <i>Itga10</i>    | ENSMUSG00000090210  | integrin, alpha 10                                                                | 1.64 |
| <i>Itga6</i>     | ENSMUSG00000027111  | integrin alpha 6                                                                  | 1.40 |
| <i>Itgam</i>     | ENSMUSG00000030786  | integrin alpha M                                                                  | 1.44 |
| <i>Itgb5</i>     | ENSMUSG00000022817  | integrin beta 5                                                                   | 1.22 |
| <i>Jakmip1</i>   | ENSMUSG00000063646  | janus kinase and microtubule interacting protein 1                                | 1.91 |
| <i>Kcne4</i>     | ENSMUSG00000047330  | potassium voltage-gated channel, Isk-related subfamily, gene 4                    | 1.22 |
| <i>Kcnj12</i>    | ENSMUSG00000042529  | potassium inwardly-rectifying channel, subfamily J, member 12                     | 1.25 |
| <i>Kcnq1</i>     | ENSMUSG00000009545  | potassium voltage-gated channel, subfamily Q, member 1                            | 1.51 |
| <i>Khny1</i>     | ENSMUSG00000047153  | KH and NYN domain containing                                                      | 1.24 |
| <i>Kir3dl1</i>   | ENSMUSG000000031424 | killer cell immunoglobulin-like receptor, three domains, long cytoplasmic tail, 1 | 1.51 |
| <i>Klk1b11</i>   | ENSMUSG00000044485  | kallikrein 1-related peptidase b11                                                | 1.26 |
| <i>Klra4</i>     | ENSMUSG00000079852  | killer cell lectin-like receptor, subfamily A, member 4                           | 1.61 |

|                   |                      |                                                                           |       |
|-------------------|----------------------|---------------------------------------------------------------------------|-------|
| <i>Krt17</i>      | ENSMUSG00000035557   | keratin 17                                                                | 1.24  |
| <i>Krt7</i>       | ENSMUSG00000023039   | keratin 7                                                                 | 1.37  |
| <i>Krt83</i>      | ENSMUSG00000047641   | keratin 83                                                                | 1.78  |
| <i>Lag3</i>       | ENSMUSG00000030124   | lymphocyte-activation gene 3                                              | 1.26  |
| <i>Lamc2</i>      | ENSMUSG00000026479   | laminin, gamma 2                                                          | 1.47  |
| <i>Lcn2</i>       | ENSMUSG00000026822   | lipocalin 2                                                               | 17.49 |
| <i>Lcp1</i>       | ENSMUSG00000021998   | lymphocyte cytosolic protein 1                                            | 1.65  |
| <i>Lct</i>        | ENSMUSG00000026354   | lactase                                                                   | 1.31  |
| <i>Lenep</i>      | ENSMUSG00000078173   | lens epithelial protein                                                   | 1.48  |
| <i>Lgals3</i>     | ENSMUSG00000050335   | lectin, galactose binding, soluble 3                                      | 1.39  |
| <i>Lgals3bp</i>   | ENSMUSG00000033880   | lectin, galactoside-binding, soluble, 3 binding protein                   | 1.72  |
| <i>Lgi4</i>       | ENSMUSG00000036560   | leucine-rich repeat LGI family, member 4                                  | 1.20  |
| <i>Ligl2</i>      | ENSMUSG00000020782   | lethal giant larvae homolog 2 (Drosophila)                                | 1.69  |
| <i>Lrba</i>       | ENSMUSG00000028080   | LPS-responsive beige-like anchor                                          | 1.32  |
| <i>Lrrc8c</i>     | ENSMUSG00000054720   | leucine rich repeat containing 8 family, member C                         | 1.32  |
| <i>Lrriq1</i>     | ENSMUSG00000019892   | leucine-rich repeats and IQ motif containing 1                            | 1.25  |
| <i>Lsr</i>        | ENSMUSG00000001247   | lipolysis stimulated lipoprotein receptor                                 | 1.28  |
| <i>Ltb</i>        | ENSMUSG00000024399   | lymphotoxin B                                                             | 1.55  |
| <i>Ltf</i>        | ENSMUSG00000032496   | lactotransferrin                                                          | 1.36  |
| <i>Ly6a</i>       | ENSMUSG00000075602   | lymphocyte antigen 6 complex, locus A                                     | 1.74  |
| <i>Ly6c1</i>      | ENSMUSG00000079018   | lymphocyte antigen 6 complex, locus C1                                    | 1.64  |
| <i>Ly6c2</i>      | ENSMUSG00000022584   | lymphocyte antigen 6 complex, locus C2                                    | 1.68  |
| <i>Ly86</i>       | ENSMUSG00000021423   | lymphocyte antigen 86                                                     | 1.39  |
| <i>Lztf11</i>     | ENSMUSG00000025245   | leucine zipper transcription factor-like 1                                | 1.27  |
| <i>Mafb</i>       | ENSMUSG00000074622   | v-maf musculoaponeurotic fibrosarcoma oncogene family, protein B (avian)  | 1.27  |
| <i>Mageb17-ps</i> | ENSMUSG000000081960  | melanoma antigen family B, 17, pseudogene                                 | 1.33  |
| <i>Mamstr</i>     | ENSMUSG00000042918   | MEF2 activating motif and SAP domain containing transcriptional regulator | 1.70  |
| <i>Man2c1</i>     | ENSMUSG00000032295   | mannosidase, alpha, class 2C, member 1                                    | 1.41  |
| <i>Map2k3</i>     | ENSMUSG00000018932   | mitogen-activated protein kinase kinase 3                                 | 1.44  |
| <i>Map4k5</i>     | ENSMUSG00000034761   | mitogen-activated protein kinase kinase kinase kinase 5                   | 1.25  |
| <i>March5</i>     | ENSMUSG00000023307   | membrane-associated ring finger (C3HC4) 5                                 | 1.44  |
| <i>Matn4</i>      | ENSMUSG00000016995   | matrilin 4                                                                | 1.24  |
| <i>Mcm9</i>       | ENSMUSG00000058298   | minichromosome maintenance complex component 9                            | 1.24  |
| <i>Men1</i>       | ENSMUSG00000024947   | multiple endocrine neoplasia 1                                            | 1.48  |
| <i>Mettl13</i>    | ENSMUSG00000026694   | methyltransferase like 13                                                 | 1.42  |
| <i>Mettl16</i>    | ENSMUSG000000010554  | methyltransferase like 16                                                 | 1.27  |
| <i>Mfsd2a</i>     | ENSMUSG00000028655   | major facilitator superfamily domain containing 2A                        | 1.29  |
| <i>Mgat1</i>      | ENSMUSG00000020346   | mannoside acetylglucosaminyltransferase 1                                 | 1.22  |
| <i>Mgp</i>        | ENSMUSG00000030218   | matrix Gla protein                                                        | 1.45  |
| <i>Micall2</i>    | ENSMUSG00000036718   | MICAL-like 2                                                              | 1.22  |
| <i>Mir27b</i>     | ENSMUSG000000065475  | microRNA 27b                                                              | 1.22  |
| <i>Mir718</i>     | ENSMUSG00000076127   | microRNA 718                                                              | 1.78  |
| <i>Mmp8</i>       | ENSMUSG00000005800   | matrix metalloproteinase 8                                                | 1.73  |
| <i>Mpeg1</i>      | ENSMUSG00000046805   | macrophage expressed gene 1                                               | 1.20  |
| <i>Mpp7</i>       | ENSMUSG000000057440  | membrane protein, palmitoylated 7 (MAGUK p55 subfamily member 7)          | 1.48  |
| <i>Mrp136</i>     | ENSMUSG000000021607  | mitochondrial ribosomal protein L36                                       | 1.73  |
| <i>Ms4a6c</i>     | ENSMUSG000000079419  | membrane-spanning 4-domains, subfamily A, member 6C                       | 1.73  |
| <i>Msh6</i>       | ENSMUSG000000005370  | mutS homolog 6 (E. coli)                                                  | 1.25  |
| <i>Msln</i>       | ENSMUSG000000063011  | mesothelin                                                                | 1.21  |
| <i>Msn</i>        | ENSMUSG000000031207  | moesin                                                                    | 1.34  |
| <i>Mtor</i>       | ENSMUSG000000028991  | mechanistic target of rapamycin (serine/threonine kinase)                 | 1.38  |
| <i>Mustn1</i>     | ENSMUSG000000042485  | musculoskeletal, embryonic nuclear protein 1                              | 1.59  |
| <i>Myadm12</i>    | ENSMUSG000000025141  | myeloid-associated differentiation marker-like 2                          | 1.26  |
| <i>Myc1</i>       | ENSMUSG000000046916  | myc target 1                                                              | 1.24  |
| <i>Myd88</i>      | ENSMUSG000000032508  | myeloid differentiation primary response gene 88                          | 1.42  |
| <i>Mylk3</i>      | ENSMUSG000000031698  | myosin light chain kinase 3                                               | 1.63  |
| <i>Myo1f</i>      | ENSMUSG000000024300  | myosin IF                                                                 | 1.28  |
| <i>Myo3a</i>      | ENSMUSG000000025716  | myosin IIIA                                                               | 3.02  |
| <i>Nbr1</i>       | ENSMUSG0000000017119 | neighbor of Brca1 gene 1                                                  | 1.28  |
| <i>Ncf1</i>       | ENSMUSG000000015950  | neutrophil cytosolic factor 1                                             | 1.26  |
| <i>Ndc80</i>      | ENSMUSG000000024056  | NDC80 homolog, kinetochore complex component (S. cerevisiae)              | 1.51  |
| <i>Necap1</i>     | ENSMUSG000000030327  | NECAP endocytosis associated 1                                            | 1.66  |

|                 |                     |                                                                                              |      |
|-----------------|---------------------|----------------------------------------------------------------------------------------------|------|
| <i>Nfkb2</i>    | ENSMUSG00000025225  | nuclear factor of kappa light polypeptide gene enhancer in B-cells 2, p49/p100               | 1.21 |
| <i>Ngp</i>      | ENSMUSG00000032484  | neutrophilic granule protein                                                                 | 3.18 |
| <i>Nkapl</i>    | ENSMUSG00000059395  | NFKB activating protein-like                                                                 | 1.24 |
| <i>Nkg7</i>     | ENSMUSG00000004612  | natural killer cell group 7 sequence                                                         | 1.24 |
| <i>Nmb</i>      | ENSMUSG000000025723 | neuromedin B                                                                                 | 1.47 |
| <i>Npas4</i>    | ENSMUSG00000045903  | neuronal PAS domain protein 4                                                                | 1.52 |
| <i>Npffr2</i>   | ENSMUSG00000035528  | neuropeptide FF receptor 2                                                                   | 1.25 |
| <i>Npy1r</i>    | ENSMUSG000000036437 | neuropeptide Y receptor Y1                                                                   | 1.33 |
| <i>Nr4a1</i>    | ENSMUSG000000023034 | nuclear receptor subfamily 4, group A, member 1                                              | 1.28 |
| <i>n-R5s204</i> | ENSMUSG000000064906 | nuclear encoded rRNA 5S 204                                                                  | 1.26 |
| <i>Ntsr1</i>    | ENSMUSG000000027568 | neurotensin receptor 1                                                                       | 1.29 |
| <i>Nudt5</i>    | ENSMUSG000000025817 | nudix (nucleoside diphosphate linked moiety X)-type motif 5                                  | 1.25 |
| <i>Oas1f</i>    | ENSMUSG00000053765  | 2'-5' oligoadenylate synthetase 1F                                                           | 1.41 |
| <i>Oas2</i>     | ENSMUSG000000032690 | 2'-5' oligoadenylate synthetase 2                                                            | 1.61 |
| <i>Oasl1</i>    | ENSMUSG00000041827  | 2'-5' oligoadenylate synthetase-like 1                                                       | 1.39 |
| <i>Oasl2</i>    | ENSMUSG000000029561 | 2'-5' oligoadenylate synthetase-like 2                                                       | 1.82 |
| <i>Olfml3</i>   | ENSMUSG000000027848 | olfactomedin-like 3                                                                          | 1.23 |
| <i>Olf11193</i> | ENSMUSG000000060827 | olfactory receptor 1193                                                                      | 1.30 |
| <i>Olf1463</i>  | ENSMUSG000000052277 | olfactory receptor 1463                                                                      | 1.21 |
| <i>Olf1354</i>  | ENSMUSG000000055088 | olfactory receptor 354                                                                       | 1.36 |
| <i>Olf1767</i>  | ENSMUSG000000059762 | olfactory receptor 767                                                                       | 1.65 |
| <i>Olf1963</i>  | ENSMUSG000000064110 | olfactory receptor 963                                                                       | 1.31 |
| <i>Oma1</i>     | ENSMUSG000000035069 | OMA1 homolog, zinc metallopeptidase ( <i>S. cerevisiae</i> )                                 | 1.54 |
| <i>Oprd1</i>    | ENSMUSG000000050511 | opioid receptor, delta 1                                                                     | 1.20 |
| <i>Osgpl1</i>   | ENSMUSG000000026096 | O-sialoglycoprotein endopeptidase-like 1                                                     | 1.23 |
| <i>Osmr</i>     | ENSMUSG000000022146 | oncostatin M receptor                                                                        | 1.51 |
| <i>Osta</i>     | ENSMUSG000000035699 | organic solute transporter alpha                                                             | 1.26 |
| <i>P2ry2</i>    | ENSMUSG000000032860 | purinergic receptor P2Y, G-protein coupled 2                                                 | 1.60 |
| <i>Pabpc11</i>  | ENSMUSG000000054582 | poly(A) binding protein, cytoplasmic 1-like                                                  | 1.38 |
| <i>Pard3b</i>   | ENSMUSG000000052062 | par-3 partitioning defective 3 homolog B ( <i>C. elegans</i> )                               | 2.49 |
| <i>Parp14</i>   | ENSMUSG000000034422 | poly (ADP-ribose) polymerase family, member 14                                               | 1.35 |
| <i>Pax5</i>     | ENSMUSG000000014030 | paired box gene 5                                                                            | 1.50 |
| <i>Pcdhb12</i>  | ENSMUSG000000043458 | protocadherin beta 12                                                                        | 1.27 |
| <i>Pcgl6</i>    | ENSMUSG000000025050 | polycomb group ring finger 6                                                                 | 1.20 |
| <i>Pde6a</i>    | ENSMUSG000000024575 | phosphodiesterase 6A, cGMP-specific, rod, alpha                                              | 1.21 |
| <i>Pdzd2</i>    | ENSMUSG000000022197 | PDZ domain containing 2                                                                      | 3.42 |
| <i>Peg10</i>    | ENSMUSG000000092035 | paternally expressed 10                                                                      | 1.43 |
| <i>Pex14</i>    | ENSMUSG000000028975 | peroxisomal biogenesis factor 14                                                             | 1.20 |
| <i>Pglyrp1</i>  | ENSMUSG000000030413 | peptidoglycan recognition protein 1                                                          | 1.41 |
| <i>Phgdh</i>    | ENSMUSG000000053398 | 3-phosphoglycerate dehydrogenase                                                             | 1.42 |
| <i>Pik3ap1</i>  | ENSMUSG000000025017 | phosphoinositide-3-kinase adaptor protein 1                                                  | 1.27 |
| <i>Plirb2</i>   | ENSMUSG000000066682 | paired immunoglobulin-like type 2 receptor beta 2                                            | 1.29 |
| <i>Pkd1l2</i>   | ENSMUSG000000034416 | polycystic kidney disease 1 like 2                                                           | 1.42 |
| <i>Pla2g2f</i>  | ENSMUSG000000028749 | phospholipase A2, group IIF                                                                  | 1.22 |
| <i>Plcxd2</i>   | ENSMUSG000000087141 | phosphatidylinositol-specific phospholipase C, X domain containing 2                         | 1.23 |
| <i>Plekha4</i>  | ENSMUSG000000040428 | pleckstrin homology domain containing, family A (phosphoinositide binding specific) member 4 | 1.30 |
| <i>Plin1</i>    | ENSMUSG000000030546 | perilipin 1                                                                                  | 1.34 |
| <i>Plin4</i>    | ENSMUSG000000002831 | perilipin 4                                                                                  | 1.23 |
| <i>Pml</i>      | ENSMUSG000000036986 | promyelocytic leukemia                                                                       | 1.20 |
| <i>Podxl</i>    | ENSMUSG000000025608 | podocalyxin-like                                                                             | 1.52 |
| <i>Polr2a</i>   | ENSMUSG000000005198 | polymerase (RNA) II (DNA directed) polypeptide A                                             | 1.20 |
| <i>Ppbp</i>     | ENSMUSG000000029372 | pro-platelet basic protein                                                                   | 1.52 |
| <i>Pqlc2</i>    | ENSMUSG000000028744 | PQ loop repeat containing 2                                                                  | 1.20 |
| <i>Pqlc3</i>    | ENSMUSG000000045679 | PQ loop repeat containing                                                                    | 1.35 |
| <i>Prokr2</i>   | ENSMUSG000000050558 | prokineticin receptor 2                                                                      | 1.80 |
| <i>Prol1</i>    | ENSMUSG000000064156 | proline rich, lacrimal 1                                                                     | 1.45 |
| <i>Prr13</i>    | ENSMUSG000000023048 | proline rich 13                                                                              | 1.23 |
| <i>Prrc2b</i>   | ENSMUSG000000039262 | proline-rich coiled-coil 2B                                                                  | 1.24 |
| <i>Psg18</i>    | ENSMUSG000000003505 | pregnancy specific glycoprotein 18                                                           | 1.57 |
| <i>Ptpr6</i>    | ENSMUSG000000004266 | protein tyrosine phosphatase, non-receptor type 6                                            | 1.25 |
| <i>Rac2</i>     | ENSMUSG000000033220 | RAS-related C3 botulinum substrate 2                                                         | 1.34 |
| <i>Racgap1</i>  | ENSMUSG000000023015 | Rac GTPase-activating protein 1                                                              | 1.40 |

|                  |                     |                                                                                                                  |      |
|------------------|---------------------|------------------------------------------------------------------------------------------------------------------|------|
| <i>Rad54b</i>    | ENSMUSG00000066307  | RAD54 homolog B ( <i>S. cerevisiae</i> )                                                                         | 1.72 |
| <i>Rad54b</i>    | ENSMUSG00000078773  | RAD54 homolog B ( <i>S. cerevisiae</i> )                                                                         | 1.26 |
| <i>Rbm28</i>     | ENSMUSG00000029701  | RNA binding motif protein 28                                                                                     | 1.24 |
| <i>Rcn3</i>      | ENSMUSG00000019539  | reticulocalbin 3, EF-hand calcium binding domain                                                                 | 1.41 |
| <i>Relt</i>      | ENSMUSG00000008318  | RELT tumor necrosis factor receptor                                                                              | 1.34 |
| <i>Retnlg</i>    | ENSMUSG00000022651  | resistin like gamma                                                                                              | 1.59 |
| <i>Rfc3</i>      | ENSMUSG00000033970  | replication factor C (activator 1) 3                                                                             | 1.33 |
| <i>Rgl2</i>      | ENSMUSG00000041354  | ral guanine nucleotide dissociation stimulator-like 2                                                            | 1.20 |
| <i>Rhbdl3</i>    | ENSMUSG00000017692  | rhomboid, veinlet-like 3 ( <i>Drosophila</i> )                                                                   | 1.51 |
| <i>Rhbg</i>      | ENSMUSG00000001417  | Rhesus blood group-associated B glycoprotein                                                                     | 1.29 |
| <i>Rhpn2</i>     | ENSMUSG00000030494  | rhopilin, Rho GTPase binding protein 2                                                                           | 1.36 |
| <i>Riok1</i>     | ENSMUSG00000021428  | RIO kinase 1 (yeast)                                                                                             | 1.46 |
| <i>Rnf213</i>    | ENSMUSG00000070327  | ring finger protein 213                                                                                          | 1.46 |
| <i>Rnf215</i>    | ENSMUSG00000003581  | ring finger protein 215                                                                                          | 1.26 |
| <i>Rpap1</i>     | ENSMUSG00000034032  | RNA polymerase II associated protein 1                                                                           | 1.66 |
| <i>Rtp1</i>      | ENSMUSG00000033383  | receptor transporter protein 1                                                                                   | 1.21 |
| <i>Rtp4</i>      | ENSMUSG00000033355  | receptor transporter protein 4                                                                                   | 1.31 |
| <i>S100a11</i>   | ENSMUSG00000027907  | S100 calcium binding protein A11 (calgizzarin)                                                                   | 1.31 |
| <i>S100a8</i>    | ENSMUSG00000056054  | S100 calcium binding protein A8 (calgranulin A)                                                                  | 1.56 |
| <i>S100a9</i>    | ENSMUSG00000056071  | S100 calcium binding protein A9 (calgranulin B)                                                                  | 1.31 |
| <i>Sag</i>       | ENSMUSG00000056055  | retinal S-antigen                                                                                                | 1.26 |
| <i>Scgb3a1</i>   | ENSMUSG000000064057 | secretoglobin, family 3A, member 1                                                                               | 4.22 |
| <i>Scepep1</i>   | ENSMUSG00000000278  | serine carboxypeptidase 1                                                                                        | 1.22 |
| <i>Sele</i>      | ENSMUSG00000026582  | selectin, endothelial cell                                                                                       | 1.25 |
| <i>Selk</i>      | ENSMUSG00000042682  | selenoprotein K                                                                                                  | 1.28 |
| <i>Selp</i>      | ENSMUSG00000026580  | selectin, platelet                                                                                               | 2.22 |
| <i>Sema4d</i>    | ENSMUSG00000021451  | sema domain, immunoglobulin domain (Ig), transmembrane domain (TM) and short cytoplasmic domain, (semaphorin) 4D | 1.31 |
| <i>Serpina10</i> | ENSMUSG00000061947  | serine (or cysteine) peptidase inhibitor, clade A (alpha-1 antiproteinase, antitrypsin), member 10               | 1.24 |
| <i>Serpina6</i>  | ENSMUSG000000060807 | serine (or cysteine) peptidase inhibitor, clade A, member 6                                                      | 1.32 |
| <i>Serpina6b</i> | ENSMUSG00000042842  | serine (or cysteine) peptidase inhibitor, clade B, member 6b                                                     | 1.41 |
| <i>Serpinh1</i>  | ENSMUSG00000070436  | serine (or cysteine) peptidase inhibitor, clade H, member 1                                                      | 1.33 |
| <i>Sfmbt1</i>    | ENSMUSG00000006527  | Scm-like with four mbt domains 1                                                                                 | 1.53 |
| <i>Sfp1</i>      | ENSMUSG00000002111  | SFFV proviral integration 1                                                                                      | 1.28 |
| <i>Sgsh</i>      | ENSMUSG00000005043  | N-sulfoglucosamine sulfohydrolase (sulfamidase)                                                                  | 1.29 |
| <i>Sh3pxd2b</i>  | ENSMUSG00000040711  | SH3 and PX domains 2B                                                                                            | 1.49 |
| <i>Sh3tc1</i>    | ENSMUSG00000036553  | SH3 domain and tetratricopeptide repeats 1                                                                       | 1.30 |
| <i>Shisa5</i>    | ENSMUSG00000025647  | shisa homolog 5 ( <i>Xenopus laevis</i> )                                                                        | 1.23 |
| <i>Sid12</i>     | ENSMUSG00000034908  | SID1 transmembrane family, member 2                                                                              | 1.40 |
| <i>Siglecg</i>   | ENSMUSG00000030468  | sialic acid binding Ig-like lectin G                                                                             | 1.29 |
| <i>Six3</i>      | ENSMUSG00000038805  | sine oculis-related homeobox 3 homolog ( <i>Drosophila</i> )                                                     | 1.21 |
| <i>Sla</i>       | ENSMUSG00000022372  | src-like adaptor                                                                                                 | 1.31 |
| <i>Slc12a8</i>   | ENSMUSG00000035506  | solute carrier family 12 (potassium/chloride transporters), member 8                                             | 1.35 |
| <i>Slc12a9</i>   | ENSMUSG00000037344  | solute carrier family 12 (potassium/chloride transporters), member 9                                             | 1.58 |
| <i>Slc16a3</i>   | ENSMUSG00000025161  | solute carrier family 16 (monocarboxylic acid transporters), member 3                                            | 1.32 |
| <i>Slc16a4</i>   | ENSMUSG00000027896  | solute carrier family 16 (monocarboxylic acid transporters), member 4                                            | 1.24 |
| <i>Slc18a2</i>   | ENSMUSG00000025094  | solute carrier family 18 (vesicular monoamine), member 2                                                         | 1.23 |
| <i>Slc26a1</i>   | ENSMUSG00000046959  | solute carrier family 26 (sulfate transporter), member 1                                                         | 1.20 |
| <i>Slc2a1</i>    | ENSMUSG00000028645  | solute carrier family 2 (facilitated glucose transporter), member 1                                              | 1.31 |
| <i>Slc2a3</i>    | ENSMUSG00000003153  | solute carrier family 2 (facilitated glucose transporter), member 3                                              | 1.23 |
| <i>Slc38a5</i>   | ENSMUSG000000031170 | solute carrier family 38, member 5                                                                               | 1.40 |
| <i>Slc45a1</i>   | ENSMUSG00000039838  | solute carrier family 45, member 1                                                                               | 1.27 |
| <i>Slc7a1</i>    | ENSMUSG00000041313  | solute carrier family 7 (cationic amino acid transporter, y+ system), member 1                                   | 1.20 |
| <i>Slco6c1</i>   | ENSMUSG00000026331  | solute carrier organic anion transporter family, member 6c1                                                      | 1.20 |
| <i>Smox</i>      | ENSMUSG00000027333  | spermine oxidase                                                                                                 | 1.24 |
| <i>SNORD115</i>  | ENSMUSG000000075781 | Small nucleolar RNA SNORD115                                                                                     | 1.29 |
| <i>Socs7</i>     | ENSMUSG00000038485  | suppressor of cytokine signaling 7                                                                               | 1.28 |
| <i>Sphk1</i>     | ENSMUSG00000061878  | sphingosine kinase 1                                                                                             | 1.38 |
| <i>SpiB</i>      | ENSMUSG00000008193  | Spi-B transcription factor (Spi-1/PU.1 related)                                                                  | 1.24 |

|                    |                    |                                                                      |      |
|--------------------|--------------------|----------------------------------------------------------------------|------|
| <i>Spsb1</i>       | ENSMUSG00000039911 | splA/ryanodine receptor domain and SOCS box containing 1             | 1.64 |
| <i>Srcap</i>       | ENSMUSG00000053877 | Snf2-related CREBBP activator protein                                | 1.34 |
| <i>Srl</i>         | ENSMUSG00000022519 | sarcalumenin                                                         | 1.28 |
| <i>Srpr</i>        | ENSMUSG00000032042 | signal recognition particle receptor ('docking protein')             | 1.47 |
| <i>Ssh1</i>        | ENSMUSG00000042121 | slingshot homolog 1 (Drosophila)                                     | 1.47 |
| <i>Stat1</i>       | ENSMUSG00000026104 | signal transducer and activator of transcription 1                   | 1.42 |
| <i>Stk19</i>       | ENSMUSG00000061207 | serine/threonine kinase 19                                           | 1.45 |
| <i>Stra6</i>       | ENSMUSG00000032327 | stimulated by retinoic acid gene 6                                   | 1.21 |
| <i>Stra8</i>       | ENSMUSG00000029848 | stimulated by retinoic acid gene 8                                   | 1.21 |
| <i>Stx19</i>       | ENSMUSG00000047854 | syntaxin 19                                                          | 1.28 |
| <i>Sult1a1</i>     | ENSMUSG00000030711 | sulfotransferase family 1A, phenol-preferring, member 1              | 1.23 |
| <i>Susd2</i>       | ENSMUSG00000006342 | sushi domain containing 2                                            | 1.29 |
| <i>Suv420h2</i>    | ENSMUSG00000059851 | suppressor of variegation 4-20 homolog 2 (Drosophila)                | 1.35 |
| <i>Suz12</i>       | ENSMUSG00000017548 | suppressor of zeste 12 homolog (Drosophila)                          | 1.23 |
| <i>Tbx3</i>        | ENSMUSG00000018604 | T-box 3                                                              | 1.22 |
| <i>Tcea1</i>       | ENSMUSG00000033813 | transcription elongation factor A (SII) 1                            | 1.45 |
| <i>Tctex1d4</i>    | ENSMUSG00000047671 | Tctex1 domain containing 4                                           | 1.33 |
| <i>Tet2</i>        | ENSMUSG00000040943 | tet oncogene family member 2                                         | 1.21 |
| <i>Tgfb1</i>       | ENSMUSG00000035493 | transforming growth factor, beta induced                             | 1.48 |
| <i>Tgfb2</i>       | ENSMUSG00000032440 | transforming growth factor, beta receptor II                         | 1.31 |
| <i>Thbd</i>        | ENSMUSG00000074743 | thrombomodulin                                                       | 1.31 |
| <i>Tiam1</i>       | ENSMUSG00000002489 | T-cell lymphoma invasion and metastasis 1                            | 1.43 |
| <i>Tle2</i>        | ENSMUSG00000034771 | transducin-like enhancer of split 2, homolog of Drosophila E(spl)    | 1.46 |
| <i>Tmbim1</i>      | ENSMUSG00000006301 | transmembrane BAX inhibitor motif containing 1                       | 1.79 |
| <i>Tmed1</i>       | ENSMUSG00000032180 | transmembrane emp24 domain containing 1                              | 1.23 |
| <i>Tmem139</i>     | ENSMUSG00000071506 | transmembrane protein 139                                            | 1.26 |
| <i>Tmem14c</i>     | ENSMUSG00000021361 | transmembrane protein 14C                                            | 1.40 |
| <i>Tmem164</i>     | ENSMUSG00000047045 | transmembrane protein 164                                            | 1.26 |
| <i>Tmem168</i>     | ENSMUSG00000029569 | transmembrane protein 168                                            | 1.40 |
| <i>Tmem173</i>     | ENSMUSG00000024349 | transmembrane protein 173                                            | 1.27 |
| <i>Tmem176a</i>    | ENSMUSG00000023367 | transmembrane protein 176A                                           | 1.39 |
| <i>Tmem176b</i>    | ENSMUSG00000029810 | transmembrane protein 176B                                           | 1.30 |
| <i>Tmem210</i>     | ENSMUSG00000026963 | transmembrane protein 210                                            | 1.24 |
| <i>Tmem222</i>     | ENSMUSG00000028857 | transmembrane protein 222                                            | 1.29 |
| <i>Tmem52</i>      | ENSMUSG00000023153 | transmembrane protein 52                                             | 1.28 |
| <i>Tmem71</i>      | ENSMUSG00000036944 | transmembrane protein 71                                             | 1.34 |
| <i>Tnfaip1</i>     | ENSMUSG00000017615 | tumor necrosis factor, alpha-induced protein 1 (endothelial)         | 1.27 |
| <i>Tnn</i>         | ENSMUSG00000026725 | tenascin N                                                           | 1.42 |
| <i>Tor3a</i>       | ENSMUSG00000060519 | torin family 3, member A                                             | 1.26 |
| <i>Trabd</i>       | ENSMUSG00000015363 | TraB domain containing                                               | 1.28 |
| <i>Trim27</i>      | ENSMUSG00000021326 | tripartite motif-containing 27                                       | 1.30 |
| <i>Trim40</i>      | ENSMUSG00000073399 | tripartite motif-containing 40                                       | 1.86 |
| <i>Tsga10ip</i>    | ENSMUSG00000039330 | testis specific 10 interacting protein                               | 1.31 |
| <i>Tshz2</i>       | ENSMUSG00000047907 | teashirt zinc finger family member 2                                 | 1.43 |
| <i>Tspo</i>        | ENSMUSG00000041736 | translocator protein                                                 | 1.20 |
| <i>Tubb1</i>       | ENSMUSG00000016255 | tubulin, beta 1                                                      | 1.23 |
| <i>U1</i>          | ENSMUSG00000089390 | U1 spliceosomal RNA                                                  | 1.34 |
| <i>U6</i>          | ENSMUSG00000065859 | U6 spliceosomal RNA                                                  | 1.30 |
| <i>U6</i>          | ENSMUSG00000064386 | U6 spliceosomal RNA                                                  | 1.28 |
| <i>U6</i>          | ENSMUSG00000075966 | U6 spliceosomal RNA                                                  | 1.27 |
| <i>U6</i>          | ENSMUSG00000064920 | U6 spliceosomal RNA                                                  | 1.26 |
| <i>U6</i>          | ENSMUSG00000065802 | U6 spliceosomal RNA                                                  | 1.23 |
| <i>Ubash3a</i>     | ENSMUSG00000042345 | ubiquitin associated and SH3 domain containing, A                    | 1.78 |
| <i>Ucp2</i>        | ENSMUSG00000033685 | uncoupling protein 2 (mitochondrial, proton carrier)                 | 1.38 |
| <i>Ugt1a9</i>      | ENSMUSG00000090175 | UDP glucuronosyltransferase 1 family, polypeptide A9                 | 1.46 |
| <i>Umodl1</i>      | ENSMUSG00000054134 | uromodulin-like 1                                                    | 1.24 |
| <i>Usp18</i>       | ENSMUSG00000030107 | ubiquitin specific peptidase 18                                      | 1.38 |
| <i>Usp50</i>       | ENSMUSG00000027364 | ubiquitin specific peptidase 50                                      | 1.31 |
| <i>Uty</i>         | ENSMUSG00000068457 | ubiquitously transcribed tetratricopeptide repeat gene, Y chromosome | 1.37 |
| <i>Vcam1</i>       | ENSMUSG00000027962 | vascular cell adhesion molecule 1                                    | 1.23 |
| <i>Vmn1r239-ps</i> | ENSMUSG00000067262 | vomer nasal 1 receptor 239, pseudogene                               | 1.27 |
| <i>Vmn1r65</i>     | ENSMUSG00000066850 | vomer nasal 1 receptor 65                                            | 1.25 |
| <i>Vmn2r109</i>    | ENSMUSG00000090572 | vomer nasal 2, receptor 109                                          | 1.22 |
| <i>Vmn2r15</i>     | ENSMUSG00000091375 | vomer nasal 2, receptor 15                                           | 1.23 |



|                |                    |                                                          |      |
|----------------|--------------------|----------------------------------------------------------|------|
| <i>Vmn2r66</i> | ENSMUSG00000072241 | vomeronasal 2, receptor 66                               | 1.27 |
| <i>Vwa5b2</i>  | ENSMUSG00000046613 | von Willebrand factor A domain containing 5B2            | 1.45 |
| <i>Vwc2l</i>   | ENSMUSG00000045648 | von Willebrand factor C domain-containing protein 2-like | 1.65 |
| <i>Vwf</i>     | ENSMUSG00000001930 | Von Willebrand factor homolog                            | 2.05 |
| <i>Wdr64</i>   | ENSMUSG00000026523 | WD repeat domain 64                                      | 1.25 |
| <i>Wdr78</i>   | ENSMUSG00000035126 | WD repeat domain 78                                      | 1.21 |
| <i>Wnt6</i>    | ENSMUSG00000033227 | wingless-related MMTV integration site 6                 | 1.20 |
| <i>Wtip</i>    | ENSMUSG00000036459 | WT1-interacting protein                                  | 1.21 |
| <i>Xbp1</i>    | ENSMUSG00000020484 | X-box binding protein 1                                  | 1.21 |
| <i>Xpo5</i>    | ENSMUSG00000067150 | exportin 5                                               | 1.24 |
| <i>Zbtb7a</i>  | ENSMUSG00000035011 | zinc finger and BTB domain containing 7a                 | 1.37 |
| <i>Zcchc9</i>  | ENSMUSG00000021621 | zinc finger, CCHC domain containing 9                    | 1.39 |
| <i>Zdhhc19</i> | ENSMUSG00000052363 | zinc finger, DHHC domain containing 19                   | 1.25 |
| <i>Zfp345</i>  | ENSMUSG00000074731 | zinc finger protein 345                                  | 1.21 |
| <i>Zfp408</i>  | ENSMUSG00000075040 | zinc finger protein 408                                  | 1.25 |
| <i>Zfp418</i>  | ENSMUSG00000034538 | zinc finger protein 418                                  | 1.20 |
| <i>Zfp446</i>  | ENSMUSG00000033961 | zinc finger protein 446                                  | 1.24 |
| <i>Zfp456</i>  | ENSMUSG00000078995 | zinc finger protein 456                                  | 1.37 |
| <i>Zfp53</i>   | ENSMUSG00000057409 | zinc finger protein 53                                   | 1.29 |
| <i>Zfp626</i>  | ENSMUSG00000030604 | zinc finger protein 626                                  | 1.24 |
| <i>Zfp677</i>  | ENSMUSG00000062743 | zinc finger protein 677                                  | 1.25 |
| <i>Zfp74</i>   | ENSMUSG00000059975 | zinc finger protein 74                                   | 1.34 |
| <i>Zfp825</i>  | ENSMUSG00000069208 | zinc finger protein 825                                  | 1.20 |
| <i>Zscan30</i> | ENSMUSG00000024274 | zinc finger and SCAN domain containing 30                | 1.49 |
