# Supplementary material for: miR-30 Family miRNAs Mediate the Effect of Chronic Social Defeat Stress on Hippocampal Neurogenesis in Mouse Depression Model
Source: PubMed Central journal article supplement (PMC6694739; doi:10.3389/fnmol.2019.00188), 2019-08-08
Supplement: Table_4.pdf [file Table_4.pdf]

**Table S4. List of genes, which demonstrated decreased expression (fold change  $\geq 1.2$  and  $p \leq 0.05$ ) in the DG of defeated mice when compared with the controls.**

| <b>Gene Symbol</b> | <b>Ensembl Id</b>    | <b>Gene Name</b>                                                                               | <b>Fold Change</b> |
|--------------------|----------------------|------------------------------------------------------------------------------------------------|--------------------|
| 0610007P08Rik      | ENSMUSG00000021470   | RIKEN cDNA 0610007P08 gene                                                                     | 0.82               |
| 0610007P22Rik      | ENSMUSG00000015126   | RIKEN cDNA 0610007P22 gene                                                                     | 0.80               |
| 1110021J02Rik      | ENSMUSG00000024018   | RIKEN cDNA 1110021J02 gene                                                                     | 0.67               |
| 1600029O15Rik      | ENSMUSG000000057818  | RIKEN cDNA 1600029O15 gene                                                                     | 0.78               |
| 1700001F09Rik      | ENSMUSG000000072603  | RIKEN cDNA 1700001F09 gene                                                                     | 0.83               |
| 1700003M02Rik      | ENSMUSG000000028294  | RIKEN cDNA 1700003M02 gene                                                                     | 0.76               |
| 1700022111Rik      | ENSMUSG000000028451  | RIKEN cDNA 1700022111 gene                                                                     | 0.70               |
| 1700023E05Rik      | ENSMUSG000000029248  | RIKEN cDNA 1700023E05 gene                                                                     | 0.72               |
| 1700029F09Rik      | ENSMUSG000000026049  | RIKEN cDNA 1700029F09 gene                                                                     | 0.59               |
| 1700034I23Rik      | ENSMUSG000000074619  | RIKEN cDNA 1700034I23 gene                                                                     | 0.76               |
| 2310003L22Rik      | ENSMUSG000000027384  | RIKEN cDNA 2310003L22 gene                                                                     | 0.69               |
| 2310079F23Rik      | ENSMUSG000000029097  | RIKEN cDNA 2310079F23 gene                                                                     | 0.66               |
| 2410015M20Rik      | ENSMUSG000000049760  | RIKEN cDNA 2410015M20 gene                                                                     | 0.81               |
| 2410141K09Rik      | ENSMUSG000000074832  | RIKEN cDNA 2410141K09 gene                                                                     | 0.82               |
| 2810417H13Rik      | ENSMUSG000000040204  | RIKEN cDNA 2810417H13 gene                                                                     | 0.72               |
| 3110003A17Rik      | ENSMUSG000000078453  | RIKEN cDNA 3110003A17 gene                                                                     | 0.81               |
| 3110039M20Rik      | ENSMUSG000000089922  | RIKEN cDNA 3110039M20 gene                                                                     | 0.54               |
| 4930438A08Rik      | ENSMUSG000000069873  | RIKEN cDNA 4930438A08 gene                                                                     | 0.81               |
| 4930447C04Rik      | ENSMUSG000000021098  | RIKEN cDNA 4930447C04 gene                                                                     | 0.53               |
| 4930506M07Rik      | ENSMUSG0000000041362 | RIKEN cDNA 4930506M07 gene                                                                     | 0.80               |
| 4930512M02Rik      | ENSMUSG000000062511  | RIKEN cDNA 4930512M02 gene                                                                     | 0.71               |
| 4930547N16Rik      | ENSMUSG000000035365  | RIKEN cDNA 4930547N16 gene                                                                     | 0.81               |
| 4930578C19Rik      | ENSMUSG000000037358  | RIKEN cDNA 4930578C19 gene                                                                     | 0.83               |
| 4932442L08Rik      | ENSMUSG000000043549  | RIKEN cDNA 4932442L08 gene                                                                     | 0.65               |
| 4933427G17Rik      | ENSMUSG000000030877  | RIKEN cDNA 4933427G17 gene                                                                     | 0.63               |
| 5330437I02Rik      | ENSMUSG000000046610  | RIKEN cDNA 5330437I02 gene                                                                     | 0.81               |
| 6820408C15Rik      | ENSMUSG000000032680  | RIKEN cDNA 6820408C15 gene                                                                     | 0.80               |
| A130023I24Rik      | ENSMUSG000000050066  | RIKEN cDNA A130023I24 gene                                                                     | 0.82               |
| A1bg               | ENSMUSG000000022347  | alpha-1-B glycoprotein                                                                         | 0.48               |
| A630010A05Rik      | ENSMUSG000000075395  | RIKEN cDNA A630010A05 gene                                                                     | 0.83               |
| Abca4              | ENSMUSG000000028125  | ATP-binding cassette, sub-family A (ABC1), member 4                                            | 0.76               |
| Abca8b             | ENSMUSG000000020620  | ATP-binding cassette, sub-family A (ABC1), member 8b                                           | 0.83               |
| Abcb4              | ENSMUSG000000042476  | ATP-binding cassette, sub-family B (MDR/TAP), member 4                                         | 0.69               |
| Abcc2              | ENSMUSG000000025194  | ATP-binding cassette, sub-family C (CFTR/MRP), member 2                                        | 0.73               |
| Abi3bp             | ENSMUSG000000035258  | ABI gene family, member 3 (NESH) binding protein                                               | 0.78               |
| Acaa1b             | ENSMUSG000000010651  | acetyl-Coenzyme A acyltransferase 1B                                                           | 0.81               |
| Acbd7              | ENSMUSG000000026644  | acyl-Coenzyme A binding domain containing 7                                                    | 0.80               |
| Acox2              | ENSMUSG000000021751  | acyl-Coenzyme A oxidase 2, branched chain                                                      | 0.73               |
| Acp1               | ENSMUSG000000044573  | acid phosphatase 1, soluble                                                                    | 0.65               |
| Acta2              | ENSMUSG000000035783  | actin, alpha 2, smooth muscle, aorta                                                           | 0.81               |
| Actr10             | ENSMUSG000000021076  | ARP10 actin-related protein 10 homolog (S. cerevisiae)                                         | 0.78               |
| Actr1a             | ENSMUSG000000025228  | ARP1 actin-related protein 1 homolog A, centractin alpha (yeast)                               | 0.81               |
| Adam2              | ENSMUSG000000022039  | a disintegrin and metallopeptidase domain 2                                                    | 0.83               |
| Adam6b             | ENSMUSG000000051804  | a disintegrin and metallopeptidase domain 6B                                                   | 0.72               |
| Adamts20           | ENSMUSG000000022449  | a disintegrin-like and metallopeptidase (reprolysin type) with thrombospondin type 1 motif, 20 | 0.65               |
| Adora2b            | ENSMUSG000000018500  | adenosine A2b receptor                                                                         | 0.80               |
| Adrb2              | ENSMUSG000000045730  | adrenergic receptor, beta 2                                                                    | 0.83               |
| Al413582           | ENSMUSG000000062753  | expressed sequence Al413582                                                                    | 0.77               |
| Akap13             | ENSMUSG000000066406  | A kinase (PRKA) anchor protein 13                                                              | 0.45               |
| Akr1c13            | ENSMUSG000000021213  | aldo-keto reductase family 1, member C13                                                       | 0.65               |
| Akr1c21            | ENSMUSG0000000021207 | aldo-keto reductase family 1, member C21                                                       | 0.65               |
| Alox15             | ENSMUSG000000018924  | arachidonate 15-lipoxygenase                                                                   | 0.82               |
| Alpk3              | ENSMUSG000000038763  | alpha-kinase 3                                                                                 | 0.80               |
| Alpl               | ENSMUSG000000028766  | alkaline phosphatase, liver/bone/kidney                                                        | 0.75               |
| Alppl2             | ENSMUSG000000026246  | alkaline phosphatase, placental-like 2                                                         | 0.75               |
| Amotl1             | ENSMUSG000000013076  | angiomin-like 1                                                                                | 0.77               |
| Ampd3              | ENSMUSG000000005686  | adenosine monophosphate deaminase 3                                                            | 0.77               |
| Amy2b              | ENSMUSG000000083079  | amylase 2b                                                                                     | 0.73               |
| Aqp4               | ENSMUSG000000024411  | aquaporin 4                                                                                    | 0.75               |
| Arhgap4            | ENSMUSG000000031389  | Rho GTPase activating protein 4                                                                | 0.72               |
| Arhgef1            | ENSMUSG000000040940  | Rho guanine nucleotide exchange factor (GEF) 1                                                 | 0.79               |

|                      |                     |                                                                                       |      |
|----------------------|---------------------|---------------------------------------------------------------------------------------|------|
| <i>Arl6ip4</i>       | ENSMUSG00000029404  | ADP-ribosylation factor-like 6 interacting protein 4                                  | 0.83 |
| <i>Arl6ip6</i>       | ENSMUSG00000026960  | ADP-ribosylation factor-like 6 interacting protein 6                                  | 0.78 |
| <i>Asb14</i>         | ENSMUSG000000021898 | ankyrin repeat and SOCS box-containing 14                                             | 0.83 |
| <i>Ascl2</i>         | ENSMUSG000000009248 | achaete-scute complex homolog 2 (Drosophila)                                          | 0.75 |
| <i>Aspdh</i>         | ENSMUSG000000038704 | aspartate dehydrogenase domain containing                                             | 0.77 |
| <i>Avil</i>          | ENSMUSG000000025432 | advillin                                                                              | 0.60 |
| <i>AW146020</i>      | ENSMUSG000000035125 | expressed sequence AW146020                                                           | 0.77 |
| <i>B230216G23Rik</i> | ENSMUSG000000071112 | RIKEN cDNA B230216G23 gene                                                            | 0.80 |
| <i>B230319C09Rik</i> | ENSMUSG000000051844 | RIKEN cDNA B230319C09 gene                                                            | 0.77 |
| <i>Bag2</i>          | ENSMUSG000000042215 | BCL2-associated athanogene 2                                                          | 0.70 |
| <i>BC002059</i>      | ENSMUSG000000060149 | cDNA sequence BC002059                                                                | 0.71 |
| <i>BC030500</i>      | ENSMUSG000000049946 | cDNA sequence BC030500                                                                | 0.75 |
| <i>BC049730</i>      | ENSMUSG000000045587 | cDNA sequence BC049730                                                                | 0.78 |
| <i>Bcl2l14</i>       | ENSMUSG000000030200 | BCL2-like 14 (apoptosis facilitator)                                                  | 0.72 |
| <i>Bmf</i>           | ENSMUSG000000040093 | BCL2 modifying factor                                                                 | 0.60 |
| <i>Bmp4</i>          | ENSMUSG000000021835 | bone morphogenetic protein 4                                                          | 0.78 |
| <i>Brwd1</i>         | ENSMUSG000000022914 | bromodomain and WD repeat domain containing 1                                         | 0.83 |
| <i>Brwd3</i>         | ENSMUSG000000063663 | bromodomain and WD repeat domain containing 3                                         | 0.70 |
| <i>Btf3l4</i>        | ENSMUSG000000028568 | basic transcription factor 3-like 4                                                   | 0.82 |
| <i>Calb2</i>         | ENSMUSG000000003657 | calbindin 2                                                                           | 0.52 |
| <i>Calcb</i>         | ENSMUSG000000030666 | calcitonin-related polypeptide, beta                                                  | 0.79 |
| <i>Car9</i>          | ENSMUSG000000028463 | carbonic anhydrase 9                                                                  | 0.77 |
| <i>Casp2</i>         | ENSMUSG000000029863 | caspase 2                                                                             | 0.68 |
| <i>Catsper4</i>      | ENSMUSG000000048003 | cation channel, sperm associated 4                                                    | 0.82 |
| <i>Ccdc114</i>       | ENSMUSG000000040189 | coiled-coil domain containing 114                                                     | 0.75 |
| <i>Ccdc122</i>       | ENSMUSG000000034795 | coiled-coil domain containing 122                                                     | 0.75 |
| <i>Ccdc77</i>        | ENSMUSG000000030177 | coiled-coil domain containing 77                                                      | 0.76 |
| <i>Cdc14b</i>        | ENSMUSG000000033102 | CDC14 cell division cycle 14 homolog B (S. cerevisiae)                                | 0.77 |
| <i>Ces1a</i>         | ENSMUSG000000071047 | carboxylesterase 1A                                                                   | 0.78 |
| <i>Chat</i>          | ENSMUSG000000021919 | choline acetyltransferase                                                             | 0.62 |
| <i>Cks1b</i>         | ENSMUSG000000028044 | CDC28 protein kinase 1b                                                               | 0.72 |
| <i>Cldn13</i>        | ENSMUSG000000008843 | claudin 13                                                                            | 0.82 |
| <i>Clgn</i>          | ENSMUSG000000002190 | calmegin                                                                              | 0.79 |
| <i>Clvs2</i>         | ENSMUSG000000019785 | clavesin 2                                                                            | 0.83 |
| <i>Cntd1</i>         | ENSMUSG000000078653 | cyclin N-terminal domain containing 1                                                 | 0.78 |
| <i>Col16a1</i>       | ENSMUSG000000040690 | collagen, type XVI, alpha 1                                                           | 0.78 |
| <i>Col5a2</i>        | ENSMUSG000000026042 | collagen, type V, alpha 2                                                             | 0.64 |
| <i>Col6a4</i>        | ENSMUSG000000032572 | collagen, type VI, alpha 4                                                            | 0.69 |
| <i>Coq6</i>          | ENSMUSG000000021235 | coenzyme Q6 homolog (yeast)                                                           | 0.76 |
| <i>Cpn1</i>          | ENSMUSG000000025196 | carboxypeptidase N, polypeptide 1                                                     | 0.63 |
| <i>Crispld1</i>      | ENSMUSG000000025776 | cysteine-rich secretory protein LCCL domain containing 1                              | 0.82 |
| <i>Crybb2</i>        | ENSMUSG000000042240 | crystallin, beta B2                                                                   | 0.73 |
| <i>Cse1l</i>         | ENSMUSG000000002718 | chromosome segregation 1-like (S. cerevisiae)                                         | 0.82 |
| <i>Csn1s1</i>        | ENSMUSG000000070702 | casein alpha s1                                                                       | 0.78 |
| <i>Csn2</i>          | ENSMUSG000000063157 | casein beta                                                                           | 0.76 |
| <i>Cyp3a59</i>       | ENSMUSG000000061292 | cytochrome P450, subfamily 3A, polypeptide 59                                         | 0.77 |
| <i>Cyp4a12a</i>      | ENSMUSG000000066071 | cytochrome P450, family 4, subfamily a, polypeptide 12a                               | 0.74 |
| <i>Cyp4b1</i>        | ENSMUSG000000028713 | cytochrome P450, family 4, subfamily b, polypeptide 1                                 | 0.78 |
| <i>Cyp51</i>         | ENSMUSG000000001467 | cytochrome P450, family 51                                                            | 0.78 |
| <i>Dbp</i>           | ENSMUSG000000059824 | D site albumin promoter binding protein                                               | 0.80 |
| <i>Dcdc2a</i>        | ENSMUSG000000035910 | doublecortin domain containing 2a                                                     | 0.81 |
| <i>Diap2</i>         | ENSMUSG000000034480 | diaphanous homolog 2 (Drosophila)                                                     | 0.49 |
| <i>Dnaic1</i>        | ENSMUSG000000061322 | dynein, axonemal, intermediate chain 1                                                | 0.67 |
| <i>Dnm3os</i>        | ENSMUSG000000078190 | dynamitin 3, opposite strand                                                          | 0.69 |
| <i>Dok7</i>          | ENSMUSG000000044716 | docking protein 7                                                                     | 0.80 |
| <i>Dph3</i>          | ENSMUSG000000021905 | DPH3 homolog (KTI11, S. cerevisiae)                                                   | 0.58 |
| <i>Drd3</i>          | ENSMUSG000000022705 | dopamine receptor D3                                                                  | 0.83 |
| <i>Dydc2</i>         | ENSMUSG000000021791 | DPY30 domain containing 2                                                             | 0.71 |
| <i>Efthb</i>         | ENSMUSG000000023931 | EF hand domain family, member B                                                       | 0.75 |
| <i>Ehmt1</i>         | ENSMUSG000000036893 | euchromatic histone methyltransferase 1                                               | 0.77 |
| <i>Eif4e2</i>        | ENSMUSG000000026254 | eukaryotic translation initiation factor 4E member 2                                  | 0.83 |
| <i>Epyc</i>          | ENSMUSG000000019936 | epiphycan                                                                             | 0.82 |
| <i>Ercc8</i>         | ENSMUSG000000021694 | excision repair cross-complementing rodent repair deficiency, complementation group 8 | 0.60 |
| <i>Esco2</i>         | ENSMUSG000000022034 | establishment of cohesion 1 homolog 2 (S. cerevisiae)                                 | 0.76 |
| <i>F12</i>           | ENSMUSG000000021492 | coagulation factor XII (Hageman factor)                                               | 0.80 |

|                |                     |                                                                                     |      |
|----------------|---------------------|-------------------------------------------------------------------------------------|------|
| <i>F9</i>      | ENSMUSG00000031138  | coagulation factor IX                                                               | 0.79 |
| <i>Fabp7</i>   | ENSMUSG00000019874  | fatty acid binding protein 7, brain                                                 | 0.69 |
| <i>Fah</i>     | ENSMUSG00000030630  | fumarylacetoacetate hydrolase                                                       | 0.77 |
| <i>Fam115e</i> | ENSMUSG00000018656  | family with sequence similarity 115, member E                                       | 0.76 |
| <i>Fam38a</i>  | ENSMUSG00000014444  | family with sequence similarity 38, member A                                        | 0.57 |
| <i>Fam83f</i>  | ENSMUSG00000022408  | family with sequence similarity 83, member F                                        | 0.65 |
| <i>Fbn1</i>    | ENSMUSG00000027204  | fibillin 1                                                                          | 0.76 |
| <i>Fbxo40</i>  | ENSMUSG00000047746  | F-box protein 40                                                                    | 0.76 |
| <i>Fbxo47</i>  | ENSMUSG00000070336  | F-box protein 47                                                                    | 0.70 |
| <i>Fbxw9</i>   | ENSMUSG00000008167  | F-box and WD-40 domain protein 9                                                    | 0.72 |
| <i>Fcgbp</i>   | ENSMUSG000000047730 | Fc fragment of IgG binding protein                                                  | 0.75 |
| <i>Fgfr2</i>   | ENSMUSG00000030849  | fibroblast growth factor receptor 2                                                 | 0.80 |
| <i>Foxi1</i>   | ENSMUSG00000047861  | forkhead box I1                                                                     | 0.80 |
| <i>Foxp2</i>   | ENSMUSG00000029563  | forkhead box P2                                                                     | 0.69 |
| <i>Frat1</i>   | ENSMUSG000000067199 | frequently rearranged in advanced T-cell lymphomas                                  | 0.80 |
| <i>Frmf7</i>   | ENSMUSG00000036131  | FERM domain containing 7                                                            | 0.78 |
| <i>Furin</i>   | ENSMUSG00000030530  | furin (paired basic amino acid cleaving enzyme)                                     | 0.69 |
| <i>Gab3</i>    | ENSMUSG00000032750  | growth factor receptor bound protein 2-associated protein 3                         | 0.73 |
| <i>Galnt12</i> | ENSMUSG00000039774  | UDP-N-acetyl-alpha-D-galactosamine:polypeptide N-acetylgalactosaminyltransferase 12 | 0.81 |
| <i>Ghr</i>     | ENSMUSG00000055737  | growth hormone receptor                                                             | 0.80 |
| <i>Gjc2</i>    | ENSMUSG00000043448  | gap junction protein, gamma 2                                                       | 0.82 |
| <i>Glb1l</i>   | ENSMUSG00000026200  | galactosidase, beta 1-like                                                          | 0.69 |
| <i>Gli2</i>    | ENSMUSG00000048402  | GLI-Kruppel family member GLI2                                                      | 0.75 |
| <i>Gli25d2</i> | ENSMUSG00000032649  | glycosyltransferase 25 domain containing 2                                          | 0.81 |
| <i>Gm10156</i> | ENSMUSG00000066245  | predicted gene 10156                                                                | 0.69 |
| <i>Gm10410</i> | ENSMUSG00000072741  | predicted gene 10410                                                                | 0.74 |
| <i>Gm10663</i> | ENSMUSG00000074302  | predicted gene 10663                                                                | 0.61 |
| <i>Gm10988</i> | ENSMUSG00000078767  | predicted gene 10988                                                                | 0.46 |
| <i>Gm11349</i> | ENSMUSG00000080840  | predicted gene 11349                                                                | 0.79 |
| <i>Gm12302</i> | ENSMUSG00000070402  | predicted gene 12302                                                                | 0.78 |
| <i>Gm12321</i> | ENSMUSG00000083171  | predicted gene 12321                                                                | 0.77 |
| <i>Gm12365</i> | ENSMUSG00000083851  | predicted gene 12365                                                                | 0.74 |
| <i>Gm12642</i> | ENSMUSG00000082325  | predicted gene 12642                                                                | 0.82 |
| <i>Gm12717</i> | ENSMUSG00000081696  | predicted gene 12717                                                                | 0.79 |
| <i>Gm1332</i>  | ENSMUSG00000074628  | predicted gene 1332                                                                 | 0.77 |
| <i>Gm13359</i> | ENSMUSG00000082951  | predicted gene 13359                                                                | 0.81 |
| <i>Gm14085</i> | ENSMUSG00000079071  | predicted gene 14085                                                                | 0.63 |
| <i>Gm14105</i> | ENSMUSG00000074763  | predicted gene 14105                                                                | 0.82 |
| <i>Gm15453</i> | ENSMUSG00000081535  | predicted gene 15453                                                                | 0.68 |
| <i>Gm15495</i> | ENSMUSG00000081732  | predicted gene 15495                                                                | 0.80 |
| <i>Gm16432</i> | ENSMUSG00000066667  | predicted gene 16432                                                                | 0.83 |
| <i>Gm16462</i> | ENSMUSG00000071735  | predicted gene 16462                                                                | 0.62 |
| <i>Gm16843</i> | ENSMUSG00000076619  | predicted gene, 16843                                                               | 0.57 |
| <i>Gm17462</i> | ENSMUSG00000091626  | predicted gene, 17462                                                               | 0.60 |
| <i>Gm17672</i> | ENSMUSG00000090847  | predicted gene, 17672                                                               | 0.60 |
| <i>Gm2663</i>  | ENSMUSG00000090480  | predicted gene 2663                                                                 | 0.83 |
| <i>Gm2783</i>  | ENSMUSG00000090316  | predicted gene 2783                                                                 | 0.60 |
| <i>Gm3594</i>  | ENSMUSG00000090943  | predicted gene 3594                                                                 | 0.80 |
| <i>Gm3636</i>  | ENSMUSG00000091754  | predicted gene 3636                                                                 | 0.69 |
| <i>Gm3662</i>  | ENSMUSG00000091663  | predicted gene 3662                                                                 | 0.60 |
| <i>Gm3696</i>  | ENSMUSG00000092167  | predicted gene 3696                                                                 | 0.75 |
| <i>Gm3727</i>  | ENSMUSG00000091325  | predicted gene 3727                                                                 | 0.65 |
| <i>Gm3739</i>  | ENSMUSG00000091472  | predicted gene 3739                                                                 | 0.76 |
| <i>Gm3755</i>  | ENSMUSG00000091227  | predicted gene 3755                                                                 | 0.65 |
| <i>Gm3760</i>  | ENSMUSG00000091042  | predicted gene 3760                                                                 | 0.65 |
| <i>Gm4027</i>  | ENSMUSG00000092019  | predicted gene 4027                                                                 | 0.72 |
| <i>Gm4736</i>  | ENSMUSG00000079276  | predicted gene 4736                                                                 | 0.76 |
| <i>Gm4955</i>  | ENSMUSG00000037849  | predicted gene 4955                                                                 | 0.59 |
| <i>Gm5277</i>  | ENSMUSG00000091361  | predicted gene 5277                                                                 | 0.71 |
| <i>Gm5431</i>  | ENSMUSG00000058163  | predicted gene 5431                                                                 | 0.67 |
| <i>Gm5458</i>  | ENSMUSG00000071574  | predicted gene 5458                                                                 | 0.81 |
| <i>Gm6356</i>  | ENSMUSG00000091400  | predicted gene 6356                                                                 | 0.64 |
| <i>Gm6455</i>  | ENSMUSG00000070940  | predicted gene 6455                                                                 | 0.74 |
| <i>Gm6905</i>  | ENSMUSG00000090938  | predicted gene 6905                                                                 | 0.75 |
| <i>Gm7651</i>  | ENSMUSG00000092227  | predicted gene 7651                                                                 | 0.73 |

|                   |                    |                                                                              |      |
|-------------------|--------------------|------------------------------------------------------------------------------|------|
| <i>Gm8374</i>     | ENSMUSG00000091676 | predicted gene 8374                                                          | 0.78 |
| <i>Gm867</i>      | ENSMUSG00000050157 | predicted gene 867                                                           | 0.80 |
| <i>Gm9246</i>     | ENSMUSG00000082080 | predicted gene 9246                                                          | 0.72 |
| <i>Gm9705</i>     | ENSMUSG00000062464 | predicted gene 9705                                                          | 0.77 |
| <i>Gng8</i>       | ENSMUSG00000063594 | guanine nucleotide binding protein (G protein), gamma 8                      | 0.71 |
| <i>Golga2</i>     | ENSMUSG00000002546 | golgi autoantigen, golgin subfamily a, 2                                     | 0.75 |
| <i>Gzme</i>       | ENSMUSG00000022156 | granzyme E                                                                   | 0.79 |
| <i>H2-DMb1</i>    | ENSMUSG00000079547 | histocompatibility 2, class II, locus Mb1                                    | 0.68 |
| <i>Hat1</i>       | ENSMUSG00000027018 | histone aminotransferase 1                                                   | 0.83 |
| <i>Hdhd3</i>      | ENSMUSG00000038422 | haloacid dehalogenase-like hydrolase domain containing 3                     | 0.77 |
| <i>Hif1an</i>     | ENSMUSG00000036450 | hypoxia-inducible factor 1, alpha subunit inhibitor                          | 0.75 |
| <i>Hoxd1</i>      | ENSMUSG00000042448 | homeobox D1                                                                  | 0.79 |
| <i>Hrc</i>        | ENSMUSG00000038239 | histidine rich calcium binding protein                                       | 0.82 |
| <i>Hsd3b7</i>     | ENSMUSG00000042289 | hydroxy-delta-5-steroid dehydrogenase, 3 beta- and steroid delta-isomerase 7 | 0.83 |
| <i>Htatip2</i>    | ENSMUSG00000039745 | HIV-1 tat interactive protein 2, homolog (human)                             | 0.38 |
| <i>Hus1b</i>      | ENSMUSG00000076430 | Hus1 homolog b (S. pombe)                                                    | 0.82 |
| <i>Huwe1</i>      | ENSMUSG00000025261 | HECT, UBA and WWE domain containing 1                                        | 0.72 |
| <i>Hyal1</i>      | ENSMUSG00000010051 | hyaluronoglucosaminidase 1                                                   | 0.69 |
| <i>Ica1</i>       | ENSMUSG00000062995 | islet cell autoantigen 1                                                     | 0.77 |
| <i>Igf2bp3</i>    | ENSMUSG00000029814 | insulin-like growth factor 2 mRNA binding protein 3                          | 0.78 |
| <i>Igkv12-41</i>  | ENSMUSG00000076568 | immunoglobulin kappa chain variable 12-41                                    | 0.80 |
| <i>Igkv14-111</i> | ENSMUSG00000076519 | immunoglobulin kappa variable 14-111                                         | 0.58 |
| <i>Igsf5</i>      | ENSMUSG00000000159 | immunoglobulin superfamily, member 5                                         | 0.79 |
| <i>Ikbkb</i>      | ENSMUSG00000031537 | inhibitor of kappaB kinase beta                                              | 0.74 |
| <i>Impdh1</i>     | ENSMUSG00000003500 | inosine 5'-phosphate dehydrogenase 1                                         | 0.80 |
| <i>Iqcd</i>       | ENSMUSG00000029601 | IQ motif containing D                                                        | 0.74 |
| <i>Itga9</i>      | ENSMUSG00000039115 | integrin alpha 9                                                             | 0.75 |
| <i>Kctd9</i>      | ENSMUSG00000034327 | potassium channel tetramerisation domain containing 9                        | 0.82 |
| <i>Kif21b</i>     | ENSMUSG00000041642 | kinesin family member 21B                                                    | 0.79 |
| <i>Kif24</i>      | ENSMUSG00000028438 | kinesin family member 24                                                     | 0.66 |
| <i>Kif2c</i>      | ENSMUSG00000028678 | kinesin family member 2C                                                     | 0.66 |
| <i>Klk1b26</i>    | ENSMUSG00000053719 | kallikrein 1-related peptidase b26                                           | 0.80 |
| <i>Klk1b27</i>    | ENSMUSG00000063177 | kallikrein 1-related peptidase b27                                           | 0.77 |
| <i>Kpna7</i>      | ENSMUSG00000038770 | karyopherin alpha 7 (importin alpha 8)                                       | 0.61 |
| <i>Krt73</i>      | ENSMUSG00000063661 | keratin 73                                                                   | 0.73 |
| <i>Krtap3-3</i>   | ENSMUSG00000069722 | keratin associated protein 3-3                                               | 0.78 |
| <i>Lama5</i>      | ENSMUSG00000015647 | laminin, alpha 5                                                             | 0.81 |
| <i>Larp1b</i>     | ENSMUSG00000037814 | La ribonucleoprotein domain family, member 1B                                | 0.73 |
| <i>Lca5</i>       | ENSMUSG00000032258 | Leber congenital amaurosis 5 (human)                                         | 0.82 |
| <i>Lce1d</i>      | ENSMUSG00000078658 | late cornified envelope 1D                                                   | 0.83 |
| <i>Lect1</i>      | ENSMUSG00000022025 | leukocyte cell derived chemotaxin 1                                          | 0.72 |
| <i>Lif</i>        | ENSMUSG00000034394 | leukemia inhibitory factor                                                   | 0.83 |
| <i>Lilrb4</i>     | ENSMUSG00000062593 | leukocyte immunoglobulin-like receptor, subfamily B, member 4                | 0.80 |
| <i>Lix1</i>       | ENSMUSG00000047786 | limb expression 1 homolog (chicken)                                          | 0.83 |
| <i>Lman1l</i>     | ENSMUSG00000056271 | lectin, mannose-binding 1 like                                               | 0.78 |
| <i>Loxhd1</i>     | ENSMUSG00000032818 | lipoxigenase homology domains 1                                              | 0.82 |
| <i>Lrrc18</i>     | ENSMUSG00000041673 | leucine rich repeat containing 18                                            | 0.76 |
| <i>Ltbp4</i>      | ENSMUSG00000040488 | latent transforming growth factor beta binding protein 4                     | 0.76 |
| <i>Ly75</i>       | ENSMUSG00000026980 | lymphocyte antigen 75                                                        | 0.71 |
| <i>Mad2l1bp</i>   | ENSMUSG00000034509 | MAD2L1 binding protein                                                       | 0.74 |
| <i>Mageb2</i>     | ENSMUSG00000073069 | melanoma antigen, family B, 2                                                | 0.62 |
| <i>Man1a2</i>     | ENSMUSG00000008763 | mannosidase, alpha, class 1A, member 2                                       | 0.71 |
| <i>Mapre1</i>     | ENSMUSG00000027479 | microtubule-associated protein, RP/EB family, member 1                       | 0.76 |
| <i>Mcoln2</i>     | ENSMUSG00000011008 | mucoilin 2                                                                   | 0.77 |
| <i>Meis1</i>      | ENSMUSG00000020160 | Meis homeobox 1                                                              | 0.73 |
| <i>Melk</i>       | ENSMUSG00000035683 | maternal embryonic leucine zipper kinase                                     | 0.78 |
| <i>Mettl11a</i>   | ENSMUSG00000026857 | methyltransferase like 11A                                                   | 0.75 |
| <i>Mfrp</i>       | ENSMUSG00000034739 | membrane-type frizzled-related protein                                       | 0.74 |
| <i>Mgl2</i>       | ENSMUSG00000040950 | macrophage galactose N-acetyl-galactosamine specific lectin 2                | 0.36 |
| <i>Mib1</i>       | ENSMUSG00000024294 | mindbomb homolog 1 (Drosophila)                                              | 0.80 |
| <i>Mill2</i>      | ENSMUSG00000040987 | MHC I like leukocyte 2                                                       | 0.79 |
| <i>Mir692-1</i>   | ENSMUSG00000076218 | microRNA 692-1                                                               | 0.79 |
| <i>Mis18bp1</i>   | ENSMUSG00000047534 | MIS18 binding protein 1                                                      | 0.82 |
| <i>Mospd1</i>     | ENSMUSG00000023074 | motile sperm domain containing 1                                             | 0.74 |
| <i>Mpo</i>        | ENSMUSG00000009350 | myeloperoxidase                                                              | 0.79 |

|                    |                     |                                                             |      |
|--------------------|---------------------|-------------------------------------------------------------|------|
| <i>Mpz1</i>        | ENSMUSG00000026566  | myelin protein zero-like 1                                  | 0.79 |
| <i>Mrc1</i>        | ENSMUSG00000026712  | mannose receptor, C type 1                                  | 0.32 |
| <i>Mre11a</i>      | ENSMUSG000000031928 | meiotic recombination 11 homolog A ( <i>S. cerevisiae</i> ) | 0.71 |
| <i>Mtap7d3</i>     | ENSMUSG000000067878 | MAP7 domain containing 3                                    | 0.73 |
| <i>Mtf1</i>        | ENSMUSG000000028890 | metal response element binding transcription factor 1       | 0.65 |
| <i>Mtm1</i>        | ENSMUSG000000031337 | X-linked myotubular myopathy gene 1                         | 0.72 |
| <i>Mtmr1</i>       | ENSMUSG000000015214 | myotubularin related protein 1                              | 0.83 |
| <i>Mtmr4</i>       | ENSMUSG000000018401 | myotubularin related protein 4                              | 0.74 |
| <i>Muc4</i>        | ENSMUSG000000079620 | mucin 4                                                     | 0.82 |
| <i>Myo1c</i>       | ENSMUSG000000017774 | myosin IC                                                   | 0.72 |
| <i>Myo1g</i>       | ENSMUSG000000020437 | myosin IG                                                   | 0.78 |
| <i>Naalad11</i>    | ENSMUSG000000054999 | N-acetylated alpha-linked acidic dipeptidase-like 1         | 0.81 |
| <i>Naip3</i>       | ENSMUSG000000082956 | NLR family, apoptosis inhibitory protein 3                  | 0.75 |
| <i>Neb</i>         | ENSMUSG000000026950 | nebulin                                                     | 0.79 |
| <i>Nes</i>         | ENSMUSG000000004891 | nestin                                                      | 0.74 |
| <i>Nexn</i>        | ENSMUSG000000039103 | nexilin                                                     | 0.65 |
| <i>Nln</i>         | ENSMUSG000000021710 | neurolysin (metallopeptidase M3 family)                     | 0.80 |
| <i>Nostrin</i>     | ENSMUSG000000034738 | nitric oxide synthase trafficker                            | 0.71 |
| <i>Npy</i>         | ENSMUSG000000029819 | neuropeptide Y                                              | 0.81 |
| <i>Npy2r</i>       | ENSMUSG000000028004 | neuropeptide Y receptor Y2                                  | 0.75 |
| <i>Nr3c2</i>       | ENSMUSG000000031618 | nuclear receptor subfamily 3, group C, member 2             | 0.79 |
| <i>Ntn5</i>        | ENSMUSG000000070564 | netrin 5                                                    | 0.75 |
| <i>Nudt1</i>       | ENSMUSG000000036639 | nudix (nucleoside diphosphate linked moiety X)-type motif 1 | 0.77 |
| <i>Nup62cl</i>     | ENSMUSG000000072944 | nucleoporin 62 C-terminal like                              | 0.67 |
| <i>Nup88</i>       | ENSMUSG000000040667 | nucleoporin 88                                              | 0.77 |
| <i>Nyx</i>         | ENSMUSG000000051228 | nyctalopin                                                  | 0.75 |
| <i>Oc90</i>        | ENSMUSG000000015001 | otoconin 90                                                 | 0.83 |
| <i>Ofd1</i>        | ENSMUSG000000040586 | oral-facial-digital syndrome 1 gene homolog (human)         | 0.80 |
| <i>Olf1021-ps1</i> | ENSMUSG000000082754 | olfactory receptor 1021, pseudogene 1                       | 0.80 |
| <i>Olf1128</i>     | ENSMUSG000000075156 | olfactory receptor 1128                                     | 0.79 |
| <i>Olf1129</i>     | ENSMUSG000000062272 | olfactory receptor 1129                                     | 0.79 |
| <i>Olf1282</i>     | ENSMUSG000000074964 | olfactory receptor 1282                                     | 0.75 |
| <i>Olf13</i>       | ENSMUSG000000043605 | olfactory receptor 13                                       | 0.77 |
| <i>Olf1477</i>     | ENSMUSG000000071629 | olfactory receptor 1477                                     | 0.79 |
| <i>Olf1508</i>     | ENSMUSG000000057564 | olfactory receptor 1508                                     | 0.81 |
| <i>Olf153</i>      | ENSMUSG000000061520 | olfactory receptor 153                                      | 0.77 |
| <i>Olf22-ps1</i>   | ENSMUSG000000079875 | olfactory receptor 22, pseudogene 1                         | 0.80 |
| <i>Olf43</i>       | ENSMUSG000000070377 | olfactory receptor 43                                       | 0.76 |
| <i>Olf430</i>      | ENSMUSG000000050134 | olfactory receptor 430                                      | 0.73 |
| <i>Olf466</i>      | ENSMUSG000000049806 | olfactory receptor 466                                      | 0.78 |
| <i>Olf47</i>       | ENSMUSG000000061210 | olfactory receptor 47                                       | 0.83 |
| <i>Olf573-ps1</i>  | ENSMUSG000000052785 | olfactory receptor 573, pseudogene 1                        | 0.81 |
| <i>Olf623</i>      | ENSMUSG000000055124 | olfactory receptor 623                                      | 0.65 |
| <i>Olf659</i>      | ENSMUSG000000073922 | olfactory receptor 659                                      | 0.78 |
| <i>Olf769</i>      | ENSMUSG000000042801 | olfactory receptor 769                                      | 0.83 |
| <i>Olf951</i>      | ENSMUSG000000060129 | olfactory receptor 951                                      | 0.81 |
| <i>P2ry12</i>      | ENSMUSG000000036353 | purinergic receptor P2Y, G-protein coupled 12               | 0.68 |
| <i>Palld</i>       | ENSMUSG000000058056 | palladin, cytoskeletal associated protein                   | 0.77 |
| <i>Panx1</i>       | ENSMUSG000000031934 | pannexin 1                                                  | 0.82 |
| <i>Papd4</i>       | ENSMUSG000000042167 | PAP associated domain containing 4                          | 0.80 |
| <i>Parl</i>        | ENSMUSG000000033918 | presenilin associated, rhomboid-like                        | 0.78 |
| <i>Pclo</i>        | ENSMUSG000000061601 | piccolo (presynaptic cytomatrix protein)                    | 0.63 |
| <i>Pdp2</i>        | ENSMUSG000000048371 | pyruvate dehydrogenase phosphatase catalytic subunit 2      | 0.80 |
| <i>Pfn4</i>        | ENSMUSG000000020639 | profilin family, member 4                                   | 0.68 |
| <i>Pglyrp4</i>     | ENSMUSG000000042250 | peptidoglycan recognition protein 4                         | 0.75 |
| <i>Phka2</i>       | ENSMUSG000000031295 | phosphorylase kinase alpha 2                                | 0.80 |
| <i>Phospho2</i>    | ENSMUSG000000027088 | phosphatase, orphan 2                                       | 0.68 |
| <i>Pik3c2b</i>     | ENSMUSG000000026447 | phosphoinositide-3-kinase, class 2, beta polypeptide        | 0.69 |
| <i>Pim1</i>        | ENSMUSG000000024014 | proviral integration site 1                                 | 0.64 |
| <i>Pkd111</i>      | ENSMUSG000000046634 | polycystic kidney disease 1 like 1                          | 0.77 |
| <i>Plkr</i>        | ENSMUSG000000041237 | pyruvate kinase liver and red blood cell                    | 0.75 |
| <i>Pla2g4e</i>     | ENSMUSG000000050211 | phospholipase A2, group IVE                                 | 0.80 |
| <i>Pltp</i>        | ENSMUSG000000017754 | phospholipid transfer protein                               | 0.68 |
| <i>Plxnb3</i>      | ENSMUSG000000031385 | plexin B3                                                   | 0.79 |
| <i>Pole</i>        | ENSMUSG000000007080 | polymerase (DNA directed), epsilon                          | 0.75 |
| <i>Polr3e</i>      | ENSMUSG000000030880 | polymerase (RNA) III (DNA directed) polypeptide E           | 0.77 |

|                  |                     |                                                                                         |      |
|------------------|---------------------|-----------------------------------------------------------------------------------------|------|
| <i>Polr3g</i>    | ENSMUSG00000035834  | polymerase (RNA) III (DNA directed) polypeptide G                                       | 0.71 |
| <i>Ppef2</i>     | ENSMUSG00000029410  | protein phosphatase, EF hand calcium-binding domain 2                                   | 0.81 |
| <i>Ppp4r1</i>    | ENSMUSG000000061950 | protein phosphatase 4, regulatory subunit 1                                             | 0.80 |
| <i>Pramef12</i>  | ENSMUSG000000028591 | PRAME family member 12                                                                  | 0.57 |
| <i>Prc1</i>      | ENSMUSG000000038943 | protein regulator of cytokinesis 1                                                      | 0.60 |
| <i>Prkg1</i>     | ENSMUSG000000052920 | protein kinase, cGMP-dependent, type I                                                  | 0.62 |
| <i>Prl7d1</i>    | ENSMUSG000000021348 | prolactin family 7, subfamily d, member 1                                               | 0.73 |
| <i>Prpf40b</i>   | ENSMUSG000000023007 | PRP40 pre-mRNA processing factor 40 homolog B (yeast)                                   | 0.73 |
| <i>Prss58</i>    | ENSMUSG000000051936 | protease, serine 58                                                                     | 0.75 |
| <i>Psg23</i>     | ENSMUSG000000074359 | pregnancy-specific glycoprotein 23                                                      | 0.78 |
| <i>Psmb5-ps</i>  | ENSMUSG000000080992 | proteasome (prosome, macropain) subunit, beta type 5, pseudogene                        | 0.72 |
| <i>Ptpn4</i>     | ENSMUSG000000026384 | protein tyrosine phosphatase, non-receptor type 4                                       | 0.73 |
| <i>Pycr1</i>     | ENSMUSG000000025140 | pyrroline-5-carboxylate reductase 1                                                     | 0.79 |
| <i>Rab34</i>     | ENSMUSG000000002059 | RAB34, member of RAS oncogene family                                                    | 0.78 |
| <i>Rad52</i>     | ENSMUSG000000030166 | RAD52 homolog (S. cerevisiae)                                                           | 0.49 |
| <i>Rarb</i>      | ENSMUSG000000017491 | retinoic acid receptor, beta                                                            | 0.77 |
| <i>Rbm3</i>      | ENSMUSG000000031167 | RNA binding motif protein 3                                                             | 0.65 |
| <i>Rbms3</i>     | ENSMUSG000000039607 | RNA binding motif, single stranded interacting protein                                  | 0.74 |
| <i>Rfc1</i>      | ENSMUSG000000029191 | replication factor C (activator 1) 1                                                    | 0.73 |
| <i>Rmi1</i>      | ENSMUSG000000035367 | RMI1, RecQ mediated genome instability 1, homolog (S. cerevisiae)                       | 0.68 |
| <i>Rnf17</i>     | ENSMUSG000000000365 | ring finger protein 17                                                                  | 0.68 |
| <i>Rnmt</i>      | ENSMUSG000000009535 | RNA (guanine-7-) methyltransferase                                                      | 0.78 |
| <i>Rpa3</i>      | ENSMUSG000000012483 | replication protein A3                                                                  | 0.80 |
| <i>Rps6ka4</i>   | ENSMUSG000000024952 | ribosomal protein S6 kinase, polypeptide 4                                              | 0.78 |
| <i>Rsph10b2</i>  | ENSMUSG000000075569 | radial spoke head 10 homolog B (Chlamydomonas)                                          | 0.67 |
| <i>Rtdr1</i>     | ENSMUSG000000009070 | rhabdoid tumor deletion region gene 1                                                   | 0.65 |
| <i>Rtf1</i>      | ENSMUSG000000027304 | Rtf1, Paf1/RNA polymerase II complex component, homolog (S. cerevisiae)                 | 0.73 |
| <i>Ryr3</i>      | ENSMUSG000000057378 | ryanodine receptor 3                                                                    | 0.76 |
| <i>Scel</i>      | ENSMUSG000000022123 | sciellin                                                                                | 0.72 |
| <i>Scgb3a2</i>   | ENSMUSG000000038791 | secretoglobin, family 3A, member 2                                                      | 0.79 |
| <i>Scube1</i>    | ENSMUSG000000016763 | signal peptide, CUB domain, EGF-like 1                                                  | 0.69 |
| <i>Sectm1a</i>   | ENSMUSG000000025165 | secreted and transmembrane 1A                                                           | 0.70 |
| <i>Sephs1</i>    | ENSMUSG000000026662 | selenophosphate synthetase 1                                                            | 0.82 |
| <i>Serpina3m</i> | ENSMUSG000000079012 | serine (or cysteine) peptidase inhibitor, clade A, member 3M                            | 0.77 |
| <i>Serpib1a</i>  | ENSMUSG000000044734 | serine (or cysteine) peptidase inhibitor, clade B, member 1a                            | 0.77 |
| <i>Serpib1b</i>  | ENSMUSG000000051029 | serine (or cysteine) peptidase inhibitor, clade B, member 1b                            | 0.75 |
| <i>Serpib3a</i>  | ENSMUSG000000044594 | serine (or cysteine) peptidase inhibitor, clade B (ovalbumin), member 3A                | 0.75 |
| <i>Serpinf1</i>  | ENSMUSG000000000753 | serine (or cysteine) peptidase inhibitor, clade F, member 1                             | 0.80 |
| <i>Set</i>       | ENSMUSG000000054766 | SET nuclear oncogene                                                                    | 0.52 |
| <i>Sfn</i>       | ENSMUSG000000047281 | stratifin                                                                               | 0.50 |
| <i>Sh3rf1</i>    | ENSMUSG000000031642 | SH3 domain containing ring finger 1                                                     | 0.79 |
| <i>Slc20a1</i>   | ENSMUSG000000027397 | solute carrier family 20, member 1                                                      | 0.79 |
| <i>Slc36a3</i>   | ENSMUSG000000049491 | solute carrier family 36 (proton/amino acid symporter), member 3                        | 0.79 |
| <i>Slc4a11</i>   | ENSMUSG000000074796 | solute carrier family 4, sodium bicarbonate transporter-like, member 11                 | 0.62 |
| <i>Slc5a2</i>    | ENSMUSG000000030781 | solute carrier family 5 (sodium/glucose cotransporter), member 2                        | 0.66 |
| <i>Slc5a9</i>    | ENSMUSG000000028544 | solute carrier family 5 (sodium/glucose cotransporter), member 9                        | 0.74 |
| <i>Slc6a15</i>   | ENSMUSG000000019894 | solute carrier family 6 (neurotransmitter transporter), member 15                       | 0.76 |
| <i>Slc7a11</i>   | ENSMUSG000000027737 | solute carrier family 7 (cationic amino acid transporter, y+ system), member 11         | 0.79 |
| <i>Slit2</i>     | ENSMUSG000000031558 | slit homolog 2 (Drosophila)                                                             | 0.72 |
| <i>Smarca5</i>   | ENSMUSG000000031715 | SWI/SNF related, matrix associated, actin dependent regulator of chromatin, subfamily 5 | 0.50 |
| <i>Sox2</i>      | ENSMUSG000000074637 | SRY-box containing gene 2                                                               | 0.74 |
| <i>Spag11a</i>   | ENSMUSG000000079842 | sperm associated antigen 11A                                                            | 0.83 |
| <i>Spag16</i>    | ENSMUSG000000053153 | sperm associated antigen 16                                                             | 0.73 |
| <i>Spag6</i>     | ENSMUSG000000022783 | sperm associated antigen 6                                                              | 0.62 |
| <i>St8sia5</i>   | ENSMUSG000000025425 | ST8 alpha-N-acetyl-neuraminidase alpha-2,8-sialyltransferase 5                          | 0.82 |
| <i>Stac</i>      | ENSMUSG000000032502 | src homology three (SH3) and cysteine rich domain                                       | 0.76 |
| <i>Stil</i>      | ENSMUSG000000028718 | ScI/Tal1 interrupting locus                                                             | 0.77 |
| <i>Stoml2</i>    | ENSMUSG000000028455 | stomatin (Epb7.2)-like 2                                                                | 0.65 |
| <i>Supv3l1</i>   | ENSMUSG000000020079 | suppressor of var1, 3-like 1 (S. cerevisiae)                                            | 0.81 |
| <i>Susd3</i>     | ENSMUSG000000021384 | sushi domain containing 3                                                               | 0.81 |
| <i>Svs5</i>      | ENSMUSG000000017004 | seminal vesicle secretory protein 5                                                     | 0.77 |
| <i>Syt15</i>     | ENSMUSG000000041479 | synaptotagmin XV                                                                        | 0.74 |

|                  |                    |                                                                    |      |
|------------------|--------------------|--------------------------------------------------------------------|------|
| <i>Tac1</i>      | ENSMUSG00000061762 | tachykinin 1                                                       | 0.75 |
| <i>Taok3</i>     | ENSMUSG00000061288 | TAO kinase 3                                                       | 0.83 |
| <i>Tcf7</i>      | ENSMUSG00000000782 | transcription factor 7, T-cell specific                            | 0.83 |
| <i>Tcfap2b</i>   | ENSMUSG00000025927 | transcription factor AP-2 beta                                     | 0.71 |
| <i>Tdh</i>       | ENSMUSG00000021953 | L-threonine dehydrogenase                                          | 0.49 |
| <i>Tex9</i>      | ENSMUSG00000032219 | testis expressed gene 9                                            | 0.51 |
| <i>Tg</i>        | ENSMUSG00000053469 | thyroglobulin                                                      | 0.77 |
| <i>Tle6</i>      | ENSMUSG00000034758 | transducin-like enhancer of split 6, homolog of Drosophila E(spl)  | 0.73 |
| <i>Tlr9</i>      | ENSMUSG00000045322 | toll-like receptor 9                                               | 0.78 |
| <i>Tlx1</i>      | ENSMUSG00000025215 | T-cell leukemia, homeobox 1                                        | 0.80 |
| <i>Tmed5</i>     | ENSMUSG00000063406 | transmembrane emp24 protein transport domain containing 5          | 0.81 |
| <i>Tmem144</i>   | ENSMUSG00000027956 | transmembrane protein 144                                          | 0.83 |
| <i>Tmem202</i>   | ENSMUSG00000049526 | transmembrane protein 202                                          | 0.74 |
| <i>Tmem35</i>    | ENSMUSG00000033578 | transmembrane protein 35                                           | 0.74 |
| <i>Tmprss15</i>  | ENSMUSG00000022857 | transmembrane protease, serine 15                                  | 0.71 |
| <i>Tnc</i>       | ENSMUSG00000028364 | tenascin C                                                         | 0.79 |
| <i>Tnfrsf10b</i> | ENSMUSG00000022074 | tumor necrosis factor receptor superfamily, member 10b             | 0.79 |
| <i>Treh</i>      | ENSMUSG00000032098 | trehalase (brush-border membrane glycoprotein)                     | 0.77 |
| <i>Trim59</i>    | ENSMUSG00000034317 | tripartite motif-containing 59                                     | 0.42 |
| <i>Tmau1ap</i>   | ENSMUSG00000028898 | tRNA selenocysteine 1 associated protein 1                         | 0.82 |
| <i>Troap</i>     | ENSMUSG00000032783 | trophinin associated protein                                       | 0.82 |
| <i>Trpm7</i>     | ENSMUSG00000027365 | transient receptor potential cation channel, subfamily M, member 7 | 0.64 |
| <i>Tspan18</i>   | ENSMUSG00000023461 | tetraspanin 18                                                     | 0.75 |
| <i>Tspan2</i>    | ENSMUSG00000027858 | tetraspanin 2                                                      | 0.79 |
| <i>Ttll6</i>     | ENSMUSG00000038756 | tubulin tyrosine ligase-like family, member 6                      | 0.82 |
| <i>Tuft1</i>     | ENSMUSG00000005968 | tuftelin 1                                                         | 0.58 |
| <i>U6</i>        | ENSMUSG00000064615 | U6 spliceosomal RNA                                                | 0.75 |
| <i>U6</i>        | ENSMUSG00000065696 | U6 spliceosomal RNA                                                | 0.83 |
| <i>Ugt8a</i>     | ENSMUSG00000032854 | UDP galactosyltransferase 8A                                       | 0.76 |
| <i>Unc45a</i>    | ENSMUSG00000030533 | unc-45 homolog A (C. elegans)                                      | 0.75 |
| <i>Usp1</i>      | ENSMUSG00000028560 | ubiquitin specific peptidase 1                                     | 0.62 |
| <i>Vill</i>      | ENSMUSG00000038775 | villin-like                                                        | 0.57 |
| <i>Vmn1r32</i>   | ENSMUSG00000062905 | vomer nasal 1 receptor 32                                          | 0.70 |
| <i>Vmn1r56</i>   | ENSMUSG00000091874 | vomer nasal 1 receptor 56                                          | 0.83 |
| <i>Vmn2r110</i>  | ENSMUSG00000091259 | vomer nasal 2, receptor 110                                        | 0.82 |
| <i>Vmn2r111</i>  | ENSMUSG00000073445 | vomer nasal 2, receptor 111                                        | 0.78 |
| <i>Vmn2r12</i>   | ENSMUSG00000090688 | vomer nasal 2, receptor 12                                         | 0.70 |
| <i>Vps54</i>     | ENSMUSG00000020128 | vacuolar protein sorting 54 (yeast)                                | 0.74 |
| <i>Wdr60</i>     | ENSMUSG00000042050 | WD repeat domain 60                                                | 0.82 |
| <i>Wdyhv1</i>    | ENSMUSG00000022359 | WDYHV motif containing 1                                           | 0.82 |
| <i>Wee2</i>      | ENSMUSG00000037159 | WEE1 homolog 2 (S. pombe)                                          | 0.52 |
| <i>Wls</i>       | ENSMUSG00000028173 | wntless homolog (Drosophila)                                       | 0.76 |
| <i>Wtap</i>      | ENSMUSG00000060475 | Wilms' tumour 1-associating protein                                | 0.77 |
| <i>Xaf1</i>      | ENSMUSG00000040483 | XIAP associated factor 1                                           | 0.73 |
| <i>Ylpm1</i>     | ENSMUSG00000021244 | YLP motif containing 1                                             | 0.74 |
| <i>Zcchc6</i>    | ENSMUSG00000035248 | zinc finger, CCHC domain containing 6                              | 0.59 |
| <i>Zfp114</i>    | ENSMUSG00000068962 | zinc finger protein 114                                            | 0.82 |
| <i>Zfp259</i>    | ENSMUSG00000032078 | zinc finger protein 259                                            | 0.79 |
| <i>Zfp46</i>     | ENSMUSG00000051351 | zinc finger protein 46                                             | 0.77 |
| <i>Zfp616</i>    | ENSMUSG00000069476 | zinc finger protein 616                                            | 0.71 |
| <i>Zfp760</i>    | ENSMUSG00000067928 | zinc finger protein 760                                            | 0.68 |
| <i>Zfp82</i>     | ENSMUSG00000058447 | zinc finger protein 82                                             | 0.72 |
| <i>Zfp945</i>    | ENSMUSG00000059142 | zinc finger protein 945                                            | 0.75 |
| <i>Zfyve19</i>   | ENSMUSG00000068580 | zinc finger, FYVE domain containing 19                             | 0.66 |
| <i>Zpld1</i>     | ENSMUSG00000064310 | zona pellucida like domain containing 1                            | 0.80 |
| <i>Zwilch</i>    | ENSMUSG00000032400 | Zwilch, kinetochore associated, homolog (Drosophila)               | 0.78 |
