# Supplementary material for: miR-30 Family miRNAs Mediate the Effect of Chronic Social Defeat Stress on Hippocampal Neurogenesis in Mouse Depression Model
Source: PubMed Central journal article supplement (PMC6694739; doi:10.3389/fnmol.2019.00188), 2019-08-08
Supplement: Table_5.pdf [file Table_5.pdf]

**Table S5. List of miRNAs, which demonstrated increased expression (fold change  $\geq 1.2$  and  $p \leq 0.05$ ) in the differentiated cells from the late phase (day 7) when compared with the proliferating neurospheres**

| <u>Name of the miRNA</u> | <u>Fold Change</u> |
|--------------------------|--------------------|
| mmu-let-7f               | 2.14               |
| mmu-let-7f-1-star        | 1.36               |
| mmu-let-7g               | 1.95               |
| mmu-let-7i               | 1.47               |
| mmu-miR-1186b            | 1.26               |
| mmu-miR-1196             | 1.69               |
| mmu-miR-1224             | 9.88               |
| mmu-miR-129-5p           | 2.14               |
| mmu-miR-149-star         | 5.28               |
| mmu-miR-152              | 1.93               |
| mmu-miR-155              | 2.32               |
| mmu-miR-1839-5p          | 2.05               |
| mmu-miR-185              | 2.81               |
| mmu-miR-1892             | 2.70               |
| mmu-miR-1899             | 1.39               |
| mmu-miR-1906             | 2.24               |
| mmu-miR-1934-star        | 18.19              |
| mmu-miR-193b-star        | 2.89               |
| mmu-miR-194              | 3.09               |
| mmu-miR-1940             | 3.44               |
| mmu-miR-1943-star        | 2.43               |
| mmu-miR-1947-star        | 1.58               |
| mmu-miR-1971             | 1.23               |
| mmu-miR-1982-star        | 2.15               |
| mmu-miR-203              | 4.27               |
| mmu-miR-211-star         | 3.36               |
| mmu-miR-2137             | 2.68               |
| mmu-miR-2182             | 1.88               |
| mmu-miR-24-2-star        | 1.80               |
| mmu-miR-2861             | 3.24               |
| mmu-miR-291b-5p          | 1.74               |
| mmu-miR-29a              | 2.55               |
| mmu-miR-29b-1-star       | 2.30               |
| mmu-miR-3059             | 1.28               |
| mmu-miR-3072-star        | 1.65               |
| mmu-miR-3077-star        | 4.49               |
| mmu-miR-3081-star        | 1.47               |
| mmu-miR-3082-5p          | 3.50               |
| mmu-miR-3090-star        | 3.78               |
| mmu-miR-3096-3p          | 21.69              |
| mmu-miR-3096-5p          | 3.25               |
| mmu-miR-3096b-3p         | 23.33              |
| mmu-miR-3096b-5p         | 6.02               |
| mmu-miR-3099-star        | 1.35               |
| mmu-miR-30a              | 2.95               |
| mmu-miR-30b              | 1.88               |
| mmu-miR-30e              | 2.72               |
| mmu-miR-31               | 2.85               |
| mmu-miR-3102-star        | 8.82               |
| mmu-miR-3104-5p          | 9.92               |
| mmu-miR-3107-star        | 1.67               |
| mmu-miR-326-star         | 2.62               |
| mmu-miR-328-star         | 2.63               |
| mmu-miR-344g-5p          | 1.31               |
| mmu-miR-346-star         | 14.50              |

|                    |       |
|--------------------|-------|
| mmu-miR-3472       | 1.83  |
| mmu-miR-3475       | 6.99  |
| mmu-miR-34b-5p     | 3.97  |
| mmu-miR-365-1-star | 3.22  |
| mmu-miR-3960       | 2.92  |
| mmu-miR-449b       | 1.80  |
| mmu-miR-466a-5p    | 1.24  |
| mmu-miR-466c-5p    | 2.27  |
| mmu-miR-466e-3p    | 1.66  |
| mmu-miR-466f       | 1.64  |
| mmu-miR-466f-5p    | 1.77  |
| mmu-miR-466h-5p    | 1.80  |
| mmu-miR-466i-5p    | 1.66  |
| mmu-miR-466j       | 2.24  |
| mmu-miR-466m-5p    | 1.88  |
| mmu-miR-466q       | 1.46  |
| mmu-miR-467h       | 1.24  |
| mmu-miR-5105       | 5.78  |
| mmu-miR-5109       | 2.45  |
| mmu-miR-5112       | 3.65  |
| mmu-miR-5115       | 12.67 |
| mmu-miR-511-5p     | 1.45  |
| mmu-miR-5122       | 9.95  |
| mmu-miR-5126       | 3.44  |
| mmu-miR-5128       | 2.13  |
| mmu-miR-5129       | 1.43  |
| mmu-miR-5130       | 4.74  |
| mmu-miR-5132       | 2.79  |
| mmu-miR-665-star   | 2.80  |
| mmu-miR-666-3p     | 1.32  |
| mmu-miR-667        | 1.58  |
| mmu-miR-668        | 1.31  |
| mmu-miR-669a-3p    | 2.25  |
| mmu-miR-669a-5p    | 2.20  |
| mmu-miR-669b       | 1.80  |
| mmu-miR-669c       | 2.42  |
| mmu-miR-669d       | 2.41  |
| mmu-miR-669e       | 2.45  |
| mmu-miR-669f-5p    | 1.83  |
| mmu-miR-669l       | 1.58  |
| mmu-miR-669m-5p    | 2.01  |
| mmu-miR-669o-3p    | 2.56  |
| mmu-miR-669o-5p    | 1.76  |
| mmu-miR-680        | 2.36  |
| mmu-miR-698        | 1.85  |
| mmu-miR-705        | 3.05  |
| mmu-miR-711        | 7.08  |
| mmu-miR-743a-star  | 1.34  |
| mmu-miR-762        | 10.38 |
| mmu-miR-96         | 1.25  |
