# Supplementary material for: miR-30 Family miRNAs Mediate the Effect of Chronic Social Defeat Stress on Hippocampal Neurogenesis in Mouse Depression Model
Source: PubMed Central journal article supplement (PMC6694739; doi:10.3389/fnmol.2019.00188), 2019-08-08
Supplement: Table_6.pdf [file Table_6.pdf]

**Table S6. List of miRNAs, which demonstrated decreased expression (fold change  $\geq 1.2$  and  $p \leq 0.05$ ) in the differentiated cells from the late phase (day 7) when compared with the proliferating neurospheres**

| <b><u>Name of the miRNA</u></b> | <b><u>Fold Change</u></b> |
|---------------------------------|---------------------------|
| mmu-let-7d-star                 | 0.56                      |
| mmu-let-7e-star                 | 0.74                      |
| mmu-miR-103                     | 0.81                      |
| mmu-miR-106a                    | 0.27                      |
| mmu-miR-106b                    | 0.54                      |
| mmu-miR-106b-star               | 0.19                      |
| mmu-miR-1195                    | 0.60                      |
| mmu-miR-1249                    | 0.70                      |
| mmu-miR-125a-3p                 | 0.54                      |
| mmu-miR-126-3p                  | 0.61                      |
| mmu-miR-128                     | 0.51                      |
| mmu-miR-1306-3p                 | 0.41                      |
| mmu-miR-130b                    | 0.32                      |
| mmu-miR-132                     | 0.26                      |
| mmu-miR-138                     | 0.48                      |
| mmu-miR-139-5p                  | 0.18                      |
| mmu-miR-149                     | 0.25                      |
| mmu-miR-151-3p                  | 0.25                      |
| mmu-miR-15b                     | 0.49                      |
| mmu-miR-17                      | 0.24                      |
| mmu-miR-17-star                 | 0.23                      |
| mmu-miR-181a                    | 0.42                      |
| mmu-miR-181b                    | 0.37                      |
| mmu-miR-181c                    | 0.44                      |
| mmu-miR-181d                    | 0.54                      |
| mmu-miR-184                     | 0.22                      |
| mmu-miR-187                     | 0.59                      |
| mmu-miR-188-5p                  | 0.41                      |
| mmu-miR-18a                     | 0.10                      |
| mmu-miR-1907                    | 0.44                      |
| mmu-miR-190-star                | 0.61                      |
| mmu-miR-191                     | 0.47                      |
| mmu-miR-1930                    | 0.73                      |
| mmu-miR-1935                    | 0.53                      |
| mmu-miR-193-star                | 0.26                      |
| mmu-miR-1946a                   | 0.30                      |
| mmu-miR-1946b                   | 0.24                      |
| mmu-miR-1965                    | 0.24                      |
| mmu-miR-1981                    | 0.53                      |
| mmu-miR-1983                    | 0.50                      |
| mmu-miR-19b                     | 0.49                      |
| mmu-miR-206                     | 0.23                      |
| mmu-miR-20a                     | 0.29                      |
| mmu-miR-20b                     | 0.32                      |
| mmu-miR-212-3p                  | 0.20                      |
| mmu-miR-212-5p                  | 0.73                      |

|                     |      |
|---------------------|------|
| mmu-miR-2136        | 0.73 |
| mmu-miR-219-3p-star | 0.47 |
| mmu-miR-25          | 0.65 |
| mmu-miR-25-star     | 0.20 |
| mmu-miR-27a-star    | 0.77 |
| mmu-miR-28c         | 0.72 |
| mmu-miR-296-3p      | 0.54 |
| mmu-miR-297a-star   | 0.64 |
| mmu-miR-298         | 0.46 |
| mmu-miR-29b         | 0.73 |
| mmu-miR-301b        | 0.59 |
| mmu-miR-3060        | 0.52 |
| mmu-miR-3074-1-3p   | 0.54 |
| mmu-miR-3093-3p     | 0.57 |
| mmu-miR-3093-5p     | 0.54 |
| mmu-miR-3102        | 0.30 |
| mmu-miR-322         | 0.57 |
| mmu-miR-322-star    | 0.49 |
| mmu-miR-324-3p      | 0.37 |
| mmu-miR-324-5p      | 0.44 |
| mmu-miR-325-star    | 0.26 |
| mmu-miR-328         | 0.62 |
| mmu-miR-331-3p      | 0.56 |
| mmu-miR-338-5p      | 0.32 |
| mmu-miR-342-3p      | 0.38 |
| mmu-miR-342-5p      | 0.30 |
| mmu-miR-345-3p      | 0.31 |
| mmu-miR-345-5p      | 0.42 |
| mmu-miR-351         | 0.14 |
| mmu-miR-351-star    | 0.28 |
| mmu-miR-362-3p      | 0.76 |
| mmu-miR-362-5p      | 0.16 |
| mmu-miR-378-star    | 0.43 |
| mmu-miR-383         | 0.20 |
| mmu-miR-3968        | 0.60 |
| mmu-miR-421         | 0.43 |
| mmu-miR-423-3p      | 0.10 |
| mmu-miR-425         | 0.37 |
| mmu-miR-425-star    | 0.47 |
| mmu-miR-467g        | 0.75 |
| mmu-miR-483         | 0.45 |
| mmu-miR-484         | 0.29 |
| mmu-miR-500         | 0.51 |
| mmu-miR-501-3p      | 0.20 |
| mmu-miR-501-5p      | 0.53 |
| mmu-miR-503         | 0.30 |
| mmu-miR-5097        | 0.37 |
| mmu-miR-5099        | 0.35 |
| mmu-miR-5100        | 0.27 |
| mmu-miR-5103        | 0.78 |

|                    |      |
|--------------------|------|
| mmu-miR-5110       | 0.30 |
| mmu-miR-5117       | 0.62 |
| mmu-miR-532-3p     | 0.12 |
| mmu-miR-532-5p     | 0.38 |
| mmu-miR-542-5p     | 0.52 |
| mmu-miR-652        | 0.55 |
| mmu-miR-669m-3p    | 0.69 |
| mmu-miR-671-3p     | 0.43 |
| mmu-miR-672        | 0.16 |
| mmu-miR-674        | 0.49 |
| mmu-miR-674-star   | 0.29 |
| mmu-miR-676        | 0.30 |
| mmu-miR-700        | 0.62 |
| mmu-miR-709        | 0.66 |
| mmu-miR-720        | 0.32 |
| mmu-miR-760-3p     | 0.73 |
| mmu-miR-760-5p     | 0.65 |
| mmu-miR-9          | 0.34 |
| mmu-miR-92a        | 0.13 |
| mmu-miR-92a-1-star | 0.60 |
| mmu-miR-93         | 0.43 |
| mmu-miR-93-star    | 0.13 |
| mmu-miR-99b        | 0.30 |
| mmu-miR-99b-star   | 0.15 |
