# Supplementary material for: miR-30 Family miRNAs Mediate the Effect of Chronic Social Defeat Stress on Hippocampal Neurogenesis in Mouse Depression Model
Source: PubMed Central journal article supplement (PMC6694739; doi:10.3389/fnmol.2019.00188), 2019-08-08
Supplement: Table_7.pdf [file Table_7.pdf]

**Table S7. List of genes, which demonstrated increased expression (fold change  $\geq 1.5$  and  $p \leq 0.05$ ) in the differentiated cells from an early phase (day 2) when compared with the proliferating neurospheres**

| <u>Gene Symbol</u> | <u>Accession No.</u> | <u>Gene Definition</u>                                                       | <u>Fold Change</u> |
|--------------------|----------------------|------------------------------------------------------------------------------|--------------------|
| 1010001D01Rik      | NM_001081456.1       |                                                                              | 1.77               |
| 1110012J17Rik      | XM_130807.1          | RIKEN cDNA 1110012J17 gene (1110012J17Rik)                                   | 1.88               |
| 1110017116Rik      | NM_008876.2          | RIKEN cDNA 1110017116 gene (1110017116Rik), transcript variant 1             | 6.15               |
| 1110036D12Rik      | NM_148927.1          |                                                                              | 2.83               |
| 1190002N15Rik      | NM_001001335.1       |                                                                              | 1.59               |
| 1190005I06Rik      | NM_013746.1          | RIKEN cDNA 1190005I06 gene (1190005I06Rik)                                   | 1.93               |
| 1190007F08Rik      | NM_133244.2          | RIKEN cDNA 1190007F08 gene (1190007F08Rik)                                   | 2.17               |
| 1300010F03Rik      | NM_011121.3          | PREDICTED: RIKEN cDNA 1300010F03 gene (1300010F03Rik)                        | 1.73               |
| 1500015O10Rik      | NM_152804.1          | RIKEN cDNA 1500015O10 gene (1500015O10Rik)                                   | 3.03               |
| 1500031L02Rik      | NM_011495.1          | RIKEN cDNA 1500031L02 gene (1500031L02Rik)                                   | 1.50               |
| 1520402A20Rik      | NM_011123.2          |                                                                              | 1.51               |
| 1700003E16Rik      | NM_008880.2          | PREDICTED: RIKEN cDNA 1700003E16 gene, transcript variant 1 (1700003E16Rik)  | 1.81               |
| 1700007K13Rik      | NM_178711.2          | RIKEN cDNA 1700007K13 gene (1700007K13Rik)                                   | 2.23               |
| 1700009P17Rik      | NM_032398.1          | RIKEN cDNA 1700009P17 gene (1700009P17Rik)                                   | 1.92               |
| 1700016J18Rik      | NM_028199.2          | PREDICTED: RIKEN cDNA 1700016J18 gene (1700016J18Rik)                        | 3.02               |
| 1700019G17Rik      | NM_008882.2          | RIKEN cDNA 1700019G17 gene (1700019G17Rik)                                   | 2.06               |
| 1700025K23Rik      | NM_172775.1          | RIKEN cDNA 1700025K23 gene (1700025K23Rik)                                   | 1.99               |
| 1700027N10Rik      | NM_008884.4          | RIKEN cDNA 1700027N10 gene (1700027N10Rik)                                   | 2.31               |
| 1700029J07Rik      | NM_008885.2          | RIKEN cDNA 1700029J07 gene (1700029J07Rik)                                   | 2.46               |
| 1700084C01Rik      | NM_175498.3          | RIKEN cDNA 1700084C01 gene (1700084C01Rik)                                   | 2.24               |
| 1700088E04Rik      | NM_025443.2          | RIKEN cDNA 1700088E04 gene (1700088E04Rik)                                   | 3.21               |
| 1810007P19Rik      | NM_013723.2          | RIKEN cDNA 1810007P19 gene (1810007P19Rik)                                   | 1.58               |
| 1810013B01Rik      | NM_008893.2          |                                                                              | 1.66               |
| 1810028F09Rik      | NM_011131.2          |                                                                              | 1.55               |
| 2210408F11Rik      | NM_008894.1          |                                                                              | 1.69               |
| 2310001H12Rik      | NM_027196            | PREDICTED: RIKEN cDNA 2310001H12 gene, transcript variant 21 (2310001H12Rik) | 1.57               |
| 2310007A19Rik      | NM_011132.1          | RIKEN cDNA 2310007A19 gene (2310007A19Rik)                                   | 2.52               |
| 2310007F21Rik      | NM_025882.3          | RIKEN cDNA 2310007F21 gene (2310007F21Rik)                                   | 1.69               |
| 2310014G06Rik      | NM_017462.2          | RIKEN cDNA 2310014G06 gene (2310014G06Rik)                                   | 1.75               |
| 2310022B05Rik      | NM_009088.2          | RIKEN cDNA 2310022B05 gene (2310022B05Rik)                                   | 2.93               |
| 2310040A07Rik      | NM_009087.1          | PREDICTED: RIKEN cDNA 2310040A07 gene (2310040A07Rik)                        | 1.71               |
| 2310040G07Rik      | NM_022811.2          |                                                                              | 1.51               |
| 2310079P10Rik      | NM_009089            |                                                                              | 2.03               |
| 2410025L10Rik      | NM_026329.2          | RIKEN cDNA 2410025L10 gene (2410025L10Rik)                                   | 1.98               |
| 2610035D17Rik      | NM_145632.1          | PREDICTED: RIKEN cDNA 2610035D17 gene (2610035D17Rik)                        | 1.96               |
| 2610109H07Rik      | NM_025901.2          | RIKEN cDNA 2610109H07 gene (2610109H07Rik)                                   | 1.52               |
| 2610524A10Rik      | NM_153415.3          |                                                                              | 2.06               |
| 2700046G09Rik      | NM_026398.2          | PREDICTED: RIKEN cDNA 2700046G09 gene (2700046G09Rik), misc RNA.             | 1.61               |
| 2700060E02Rik      | NM_008898.1          | RIKEN cDNA 2700060E02 gene (2700060E02Rik)                                   | 3.49               |
| 2810003C17Rik      | NM_011141.2          | RIKEN cDNA 2810003C17 gene (2810003C17Rik)                                   | 3.09               |
| 2810402K13Rik      | NM_026438.2          |                                                                              | 1.74               |
| 2810454F19Rik      | NM_146141.1          |                                                                              | 1.56               |
| 2810459M11Rik      | NM_145610            |                                                                              | 2.61               |
| 2900011O08Rik      | NM_008247.2          | RIKEN cDNA 2900011O08 gene (2900011O08Rik)                                   | 2.30               |
| 2900026A02Rik      | NM_080555.2          |                                                                              | 1.64               |
| 2900060N12Rik      | NM_008904.1          |                                                                              | 1.55               |
| 3010015F07Rik      | XM_001002886.2       |                                                                              | 1.92               |
| 3100002J23Rik      | NM_008907.1          | PREDICTED: RIKEN cDNA 3100002J23 gene, transcript variant 2 (3100002J23Rik)  | 3.85               |
| 3110004L20Rik      | NM_011149.2          | RIKEN cDNA 3110004L20 gene (3110004L20Rik)                                   | 1.63               |
| 3110018K01Rik      | NM_008908.3          |                                                                              | 2.26               |
| 3110023G01Rik      | NM_026352.2          |                                                                              | 1.56               |
| 3110049J23Rik      | NM_134084.1          | RIKEN cDNA 3110049J23 gene (3110049J23Rik)                                   | 1.64               |
| 3526401B18Rik      | NM_028677            |                                                                              | 1.60               |
| 3830406C13Rik      | XM_994766.1          | RIKEN cDNA 3830406C13 gene (3830406C13Rik), transcript variant 2             | 1.54               |
| 4432405B04Rik      | NM_011151.1          | RIKEN cDNA 4432405B04 gene (4432405B04Rik)                                   | 1.69               |
| 4631416L12Rik      | NM_008014.3          | RIKEN cDNA 4631416L12 gene (4631416L12Rik)                                   | 1.66               |
| 4832420L08Rik      | NM_001098231.1       |                                                                              | 1.69               |
| 4833409N03Rik      | NM_031868.2          |                                                                              | 2.12               |
| 4833414E09Rik      | NM_027892.2          |                                                                              | 1.56               |
| 4833420G17Rik      | NM_008889.1          | RIKEN cDNA 4833420G17 gene (4833420G17Rik)                                   | 1.86               |
| 4833441J24Rik      | NM_144828.1          |                                                                              | 3.16               |
| 4930402H24Rik      | NM_146154.1          |                                                                              | 2.66               |
| 4930438O05Rik      | NM_017374.3          |                                                                              | 1.61               |

|               |                |                                                                                                            |      |
|---------------|----------------|------------------------------------------------------------------------------------------------------------|------|
| 4930455F23Rik | NM_027531.1    | RIKEN cDNA 4930455F23 gene (4930455F23Rik)                                                                 | 1.64 |
| 4930528G09Rik | NM_001081458.1 |                                                                                                            | 1.62 |
| 4930570C03Rik | NM_008913.1    | RIKEN cDNA 4930570C03 gene (4930570C03Rik)                                                                 | 1.68 |
| 4931426K16Rik | NM_008914      |                                                                                                            | 1.50 |
| 4932425I24Rik | NM_024459.2    | RIKEN cDNA 4932425I24 gene (4932425I24Rik)                                                                 | 2.01 |
| 4932443I19Rik | NM_024209.2    | PREDICTED: RIKEN cDNA 4932443I19 gene, transcript variant 1 (4932443I19Rik)                                | 1.93 |
| 4933407L21Rik | NM_001081214.1 |                                                                                                            | 7.11 |
| 4933421G18Rik | NM_172574.1    |                                                                                                            | 1.53 |
| 4933434I06Rik | NM_145150.1    | RIKEN cDNA 4933434I06 gene (4933434I06Rik)                                                                 | 4.54 |
| 4933439C20Rik | NM_028243.2    | RIKEN cDNA 4933439C20 gene (4933439C20Rik)                                                                 | 1.67 |
| 5031425E22Rik | NM_016764.3    |                                                                                                            | 1.75 |
| 5031439G07Rik | NM_007453.2    |                                                                                                            | 2.07 |
| 5033414K04Rik | NM_054077.3    | RIKEN cDNA 5033414K04 gene (5033414K04Rik)                                                                 | 1.80 |
| 5330403J18Rik | NM_011156.2    |                                                                                                            | 2.75 |
| 5330431K02Rik | NM_011073.2    |                                                                                                            | 1.54 |
| 5430405G05Rik | NM_008854.3    |                                                                                                            | 2.20 |
| 5430434G16Rik | NM_011100.3    |                                                                                                            | 1.52 |
| 5430435G22Rik | NM_145401.1    | RIKEN cDNA 5430435G22 gene (5430435G22Rik)                                                                 | 1.80 |
| 5730402C02Rik | NM_021880.2    |                                                                                                            | 2.22 |
| 5730410E15Rik | NM_011158.3    | RIKEN cDNA 5730410E15 gene (5730410E15Rik), transcript variant c                                           | 2.67 |
| 6030410I10Rik | NM_008855.2    |                                                                                                            | 2.07 |
| 6230400G14Rik | NM_027230.3    |                                                                                                            | 2.11 |
| 6330403K07Rik | NM_028444.1    | RIKEN cDNA 6330403K07 gene (6330403K07Rik)                                                                 | 3.97 |
| 6330405H19    | NM_008859.1    |                                                                                                            | 1.77 |
| 6330414G02Rik | NM_008925.1    |                                                                                                            | 7.42 |
| 6330505N24Rik | NM_029239.2    | RIKEN cDNA 6330505N24 gene (6330505N24Rik)                                                                 | 1.98 |
| 6430537H07Rik | NM_133740.1    | RIKEN cDNA 6430537H07 gene (6430537H07Rik)                                                                 | 2.18 |
| 6430548M08Rik | NM_013768.2    |                                                                                                            | 2.43 |
| 6430550H21Rik | NM_145404.1    | RIKEN cDNA 6430550H21 gene (6430550H21Rik)                                                                 | 1.94 |
| 7330410H16Rik | NM_011170.1    |                                                                                                            | 1.58 |
| 7530408C15Rik | NM_011172.1    |                                                                                                            | 2.13 |
| 8030467N07Rik | NM_021381.3    |                                                                                                            | 1.62 |
| 9130020G22Rik | AK029921       |                                                                                                            | 1.51 |
| 9330132O05Rik | NM_197945.2    |                                                                                                            | 1.72 |
| 9330158N06Rik | NM_134129.2    |                                                                                                            | 1.64 |
| 9330175B01Rik | NM_172697.1    |                                                                                                            | 2.06 |
| 9330177P20Rik | NM_178774.3    |                                                                                                            | 1.67 |
| 9630009A08Rik | NM_028447.2    |                                                                                                            | 1.91 |
| 9830134K01Rik | NM_178738.2    |                                                                                                            | 1.54 |
| 9830143E02Rik | NM_011179.2    |                                                                                                            | 1.51 |
| 9830169C18Rik | NM_028707.3    | RIKEN cDNA 9830169C18 gene (9830169C18Rik)                                                                 | 1.53 |
| A230057G18Rik | NM_020261.2    |                                                                                                            | 7.18 |
| A230057M07Rik | NM_133948.4    |                                                                                                            | 1.84 |
| A330021E22Rik | NM_011967.2    | RIKEN cDNA A330021E22 gene (A330021E22Rik)                                                                 | 2.56 |
| A730036E13Rik | NM_011969.1    | PREDICTED: RIKEN cDNA A730036E13 gene (A730036E13Rik)                                                      | 1.96 |
| A830073O21Rik | NM_011185.3    |                                                                                                            | 1.70 |
| A830080H07Rik | NM_013640.1    |                                                                                                            | 1.82 |
| A830081L15Rik | NM_011970.3    |                                                                                                            | 1.93 |
| A830094I09Rik | NM_011971.4    |                                                                                                            | 1.50 |
| A930008A22Rik | NM_008945.2    |                                                                                                            | 2.08 |
| Abat          | NM_011186.1    | 4-aminobutyrate aminotransferase (Abat), nuclear gene encoding mitochondrial protein                       | 1.85 |
| Abcc12        | NM_008946.2    | ATP-binding cassette, sub-family C (CFTR/MRP), member 12 (Abcc12)                                          | 2.53 |
| Abcc4         | NM_011187.1    | ATP-binding cassette, sub-family C (CFTR/MRP), member 4 (Abcc4)                                            | 1.53 |
| Abcc5         | NM_008947      | ATP-binding cassette, sub-family C (CFTR/MRP), member 5 (Abcc5), transcript variant 2                      | 2.11 |
| Abhd1         | NM_011188.1    | abhydrolase domain containing 1 (Abhd1), transcribed RNA.                                                  | 2.72 |
| Abhd14b       | NM_008949.2    | abhydrolase domain containing 14b (Abhd14b)                                                                | 3.79 |
| Abhd3         | NM_011874.2    | abhydrolase domain containing 3 (Abhd3)                                                                    | 1.54 |
| Ablim2        | NM_008950.1    | actin-binding LIM protein 2 (Ablim2)                                                                       | 2.39 |
| Acaa2         | NM_025894.1    |                                                                                                            | 1.66 |
| Acadm         | NM_021526      | acyl-Coenzyme A dehydrogenase, medium chain (Acadm)                                                        | 1.73 |
| Acot1         | NM_080554.2    | acyl-CoA thioesterase 1 (Acot1)                                                                            | 2.16 |
| Acot11        | NM_026545.2    | acyl-CoA thioesterase 11 (Acot11)                                                                          | 1.67 |
| Acss1         | NM_011192.3    | acyl-CoA synthetase short-chain family member 1 (Acss1), nuclear gene encoding mitochondrial protein       | 2.79 |
| Acta2         | NM_026873.2    | actin, alpha 2, smooth muscle, aorta (Acta2)                                                               | 3.01 |
| Actn1         | NM_008960.2    | actinin, alpha 1 (Actn1)                                                                                   | 2.43 |
| Adamts16      | NM_007982.1    | a disintegrin-like and metalloproteinase (reprolysin type) with thrombospondin type 1 motif, 16 (Adamts16) | 2.51 |

|               |                |                                                                                                         |       |
|---------------|----------------|---------------------------------------------------------------------------------------------------------|-------|
| Adamts9       | NM_008973.2    |                                                                                                         | 1.65  |
| Adamts11      | NM_011203.2    |                                                                                                         | 1.62  |
| Adck4         | NM_011212.2    |                                                                                                         | 1.77  |
| Adcy2         | NM_011216.2    | adenylate cyclase 2 (Adcy2)                                                                             | 1.63  |
| Adcy8         | NM_001081306.1 | adenylate cyclase 8 (Adcy8)                                                                             | 3.37  |
| Adora1        | NM_030723.1    | adenosine A1 receptor (Adora1), transcript variant 1                                                    | 2.38  |
| Adra2a        | NM_008988.2    | adrenergic receptor, alpha 2a (Adra2a)                                                                  | 9.74  |
| Agt           | NM_172437.2    | angiotensinogen (serpin peptidase inhibitor, clade A, member 8) (Agt)                                   | 2.47  |
| Agtrap        | XM_001476573.1 | angiotensin II, type I receptor-associated protein (Agtrap)                                             | 1.50  |
| Ahnak         | NM_013645.3    | AHNAK nucleoprotein (desmoyokin) (Ahnak), transcript variant 1                                          | 16.58 |
| Al646023      | NM_021495.2    | expressed sequence Al646023 (Al646023)                                                                  | 1.68  |
| Al662250      | NM_133705.1    | expressed sequence Al662250 (Al662250)                                                                  | 2.23  |
| Al875142      | NM_153781.1    |                                                                                                         | 2.73  |
| Ak311         | NM_027455.1    | adenylate kinase 3-like 1 (Ak311), nuclear gene encoding mitochondrial protein                          | 2.19  |
| Akap14        | NM_001081054.2 | A kinase (PRKA) anchor protein 14 (Akap14)                                                              | 2.94  |
| Akap8l        | NM_008997.3    | A kinase (PRKA) anchor protein 8-like (Akap8l)                                                          | 1.69  |
| Aldh3a2       | NM_175543      |                                                                                                         | 1.60  |
| Aldh5a1       | XM_283428.6    |                                                                                                         | 1.97  |
| Aldh6a1       | NM_026405.3    | aldehyde dehydrogenase family 6, subfamily A1 (Aldh6a1), nuclear gene encoding mitochondrial protein    | 2.22  |
| Aldoc         | NM_033475.2    | aldolase C, fructose-bisphosphate (Aldoc)                                                               | 1.78  |
| Ampd3         | NM_198163.1    | adenosine monophosphate deaminase 3 (Ampd3)                                                             | 1.82  |
| Amy1          | XM_125709.3    | amylase 1, salivary (Amy1)                                                                              | 1.95  |
| Amy2-2        | NM_009001.3    | amylase 2-2, pancreatic (Amy2-2)                                                                        | 6.05  |
| Angpt1        | NM_023537.4    | angiopoietin 1 (Angpt1)                                                                                 | 1.89  |
| Angptl4       | NM_031874.4    | angiopoietin-like 4 (Angptl4)                                                                           | 3.71  |
| Ank           | XM_980542.1    | progressive ankylosis (Ank)                                                                             | 3.15  |
| Anxa11        | NM_024456.2    | annexin A11 (Anxa11)                                                                                    | 1.60  |
| Anxa5         | NM_173781.3    | annexin A5 (Anxa5)                                                                                      | 1.95  |
| Ap3m2         | NM_173413.2    | adaptor-related protein complex 3, mu 2 subunit (Ap3m2)                                                 | 3.28  |
| Apoe          | NM_011231.1    | apolipoprotein E (Apoe)                                                                                 | 6.43  |
| Aqp4          | NM_145510.1    | aquaporin 4 (Aqp4)                                                                                      | 5.72  |
| Aqp9          | NM_026817.3    | aquaporin 9 (Aqp9)                                                                                      | 1.85  |
| Arf2          | NM_011234.2    | ADP-ribosylation factor 2 (Arf2)                                                                        | 1.58  |
| Arhgef4       | NM_053269.2    | Rho guanine nucleotide exchange factor (GEF) 4 (Arhgef4)                                                | 2.73  |
| Armc3         | NM_009015.2    | armadillo repeat containing 3 (Armc3)                                                                   | 2.27  |
| Armc9         | NM_009017.1    | armadillo repeat containing 9 (Armc9), transcript variant 1                                             | 1.64  |
| Arrdc3        | NM_009057.2    |                                                                                                         | 2.31  |
| Arsb          | NM_011973.2    | arylsulfatase B (Arsb)                                                                                  | 2.15  |
| Arsg          | NM_018740.1    | arylsulfatase G (Arsg)                                                                                  | 2.02  |
| Asphd2        | NM_175211      | aspartate beta-hydroxylase domain containing 2 (Asphd2)                                                 | 1.82  |
| Ass1          | NM_023130.2    | argininosuccinate synthetase 1 (Ass1)                                                                   | 1.79  |
| Atf3          | NM_019444.2    | activating transcription factor 3 (Atf3)                                                                | 1.57  |
| Atg12         | NM_009391.3    | autophagy-related 12 (yeast) (Atg12)                                                                    | 1.53  |
| Atp1a1        | NM_011239.2    | ATPase, Na <sup>+</sup> /K <sup>+</sup> transporting, alpha 1 polypeptide (Atp1a1)                      | 2.32  |
| Atp1b1        | NM_011241      | ATPase, Na <sup>+</sup> /K <sup>+</sup> transporting, beta 1 polypeptide (Atp1b1)                       | 1.99  |
| Atp1b2        | NM_021329.2    | ATPase, Na <sup>+</sup> /K <sup>+</sup> transporting, beta 2 polypeptide (Atp1b2)                       | 1.83  |
| Atp8a1        | NM_024457.2    | ATPase, aminophospholipid transporter (APLT), class I, type 8A, member 1 (Atp8a1), transcript variant 2 | 1.55  |
| Atnx1         | NM_172413.2    | ataxin 1 (Atnx1)                                                                                        | 1.77  |
| AU021034      | NM_144850.1    | expressed sequence AU021034 (AU021034)                                                                  | 3.33  |
| AW555464      | XM_001475793.1 |                                                                                                         | 1.75  |
| Axl           | NM_025936.1    | AXL receptor tyrosine kinase (Axl)                                                                      | 2.04  |
| B230112P13Rik | NM_009025.2    |                                                                                                         | 2.64  |
| B230208N19Rik | NM_177644.4    | PREDICTED: RIKEN cDNA B230208N19 gene, transcript variant 1 (B230208N19Rik)                             | 1.50  |
| B230311B06Rik | NM_138956.3    | PREDICTED: RIKEN cDNA B230311B06 gene (B230311B06Rik)                                                   | 1.75  |
| B230342M21Rik | NM_178045.3    | RIKEN cDNA B230342M21 gene (B230342M21Rik)                                                              | 1.90  |
| B230342N21Rik | NM_009030.3    |                                                                                                         | 1.93  |
| B3galt5       | NM_009031.2    | UDP-Gal:betaGlcNAc beta 1,3-galactosyltransferase, polypeptide 5 (B3galt5)                              | 1.82  |
| B3gat1        | NM_011249.1    | beta-1,3-glucuronyltransferase 1 (glucuronosyltransferase P) (B3gat1)                                   | 2.24  |
| B930008G03Rik | NM_026453.1    |                                                                                                         | 3.44  |
| B930045J24Rik | XM_131139.4    |                                                                                                         | 1.58  |
| B9d1          | NM_178660.2    | B9 protein domain 1 (B9d1)                                                                              | 1.91  |
| Bace2         | NM_011252.2    | beta-site APP-cleaving enzyme 2 (Bace2)                                                                 | 2.97  |
| BB128963      | NM_019712.3    |                                                                                                         | 1.55  |
| Bbc3          | NM_133878.2    | BCL2 binding component 3 (Bbc3)                                                                         | 1.72  |
| Bbox1         | NM_021525.2    | butyrobetaine (gamma), 2-oxoglutarate dioxygenase 1 (gamma-butyrobetaine hydroxylase) (Bbox1)           | 3.46  |
| Bbs2          | NM_021557      | Bardet-Biedl syndrome 2 (human) (Bbs2)                                                                  | 1.58  |

|               |                |                                                                                        |      |
|---------------|----------------|----------------------------------------------------------------------------------------|------|
| Bbs4          | NM_134006.4    | Bardet-Biedl syndrome 4 (human) (Bbs4)                                                 | 1.81 |
| BC022687      | NM_011261.2    | cDNA sequence BC022687 (BC022687)                                                      | 1.60 |
| BC024537      | NM_009048.1    |                                                                                        | 1.69 |
| BC030476      | NM_181988.1    | cDNA sequence BC030476 (BC030476)                                                      | 3.77 |
| BC031353      | NM_026159.4    | cDNA sequence BC031353 (BC031353)                                                      | 1.51 |
| BC038167      | NM_011264.3    |                                                                                        | 2.21 |
| BC050811      | NM_011258.1    | cDNA sequence BC050811 (BC050811)                                                      | 2.20 |
| Bcar3         | NM_020022.2    | breast cancer anti-estrogen resistance 3 (Bcar3)                                       | 1.62 |
| Bcas3         | XM_132528.3    | breast carcinoma amplified sequence 3 (Bcas3)                                          | 2.44 |
| Bcl2l11       | NM_145480      | BCL2-like 11 (apoptosis facilitator) (Bcl2l11), transcript variant 1                   | 1.62 |
| Bdh2          | NM_028128.1    | 3-hydroxybutyrate dehydrogenase, type 2 (Bdh2)                                         | 2.82 |
| Bicc1         | NM_028713.1    | bicaudal C homolog 1 (Drosophila) (Bicc1)                                              | 1.70 |
| Birc1cl       | NM_009056.1    |                                                                                        | 2.18 |
| Bmpr1b        | NM_016846.3    | bone morphogenetic protein receptor, type 1B (Bmpr1b)                                  | 1.59 |
| Bzrap1        | NM_009059.2    | benzodiazepine receptor associated protein 1 (Bzrap1)                                  | 2.98 |
| C030009J22Rik | NM_177740.4    |                                                                                        | 5.30 |
| C030027H14Rik | NM_009061      |                                                                                        | 1.65 |
| C030048H21Rik | NM_009062.3    | PREDICTED: RIKEN cDNA C030048H21 gene (C030048H21Rik)                                  | 1.70 |
| C130023A14Rik | NM_011880.2    |                                                                                        | 1.54 |
| C130072A16Rik | NM_029879.2    |                                                                                        | 2.02 |
| C1ql2         | NM_010117.1    | complement component 1, q subcomponent-like 2 (C1ql2)                                  | 2.44 |
| C230070D10Rik | NM_183163.2    |                                                                                        | 2.48 |
| C3            | NM_007483.2    |                                                                                        | 4.22 |
| C430004E15Rik | NM_153514.4    | RIKEN cDNA C430004E15 gene (C430004E15Rik)                                             | 1.70 |
| C4a           | NM_007484.1    | complement component 4A (Rodgers blood group) (C4a)                                    | 5.55 |
| C4b           | NM_023275.2    | complement component 4B (Childo blood group) (C4b)                                     | 5.11 |
| C530044C16Rik | NM_145999.2    |                                                                                        | 3.69 |
| C630002C17Rik | NM_008164.1    |                                                                                        | 5.48 |
| Cachd1        | NM_027897.3    | cache domain containing 1 (Cachd1)                                                     | 2.15 |
| Cacna2d3      | NM_028724.2    | calcium channel, voltage-dependent, alpha2/delta subunit 3 (Cacna2d3)                  | 2.04 |
| Cacnb4        | NM_024182.4    | calcium channel, voltage-dependent, beta 4 subunit (Cacnb4), transcript variant 2      | 1.71 |
| Camk2g        | NR_003278.1    | calcium/calmodulin-dependent protein kinase II gamma (Camk2g)                          | 1.87 |
| Capn1         | NM_011271.2    | calpain 1 (Capn1)                                                                      | 1.50 |
| Capn5         | NM_026001.2    | calpain 5 (Capn5)                                                                      | 1.55 |
| Carhsp1       | NM_020012.1    | calcium regulated heat stable protein 1 (Carhsp1)                                      | 1.62 |
| Casq2         | NM_028862.2    | calsequestrin 2 (Casq2)                                                                | 1.76 |
| Cat           | NM_183204.2    | catalase (Cat)                                                                         | 1.51 |
| Cc2d2a        | NM_153762.3    | coiled-coil and C2 domain containing 2A (Cc2d2a)                                       | 1.54 |
| Ccdc19        | NM_011278.3    | PREDICTED: coiled-coil domain containing 19, transcript variant 1 (Ccdc19)             | 1.77 |
| Ccdc39        | NM_134064.1    | coiled-coil domain containing 39 (Ccdc39)                                              | 2.07 |
| Ccdc96        | NM_009070.1    | coiled-coil domain containing 96 (Ccdc96)                                              | 1.70 |
| Ccrk          | NM_019413.2    | cell cycle related kinase (Ccrk)                                                       | 1.84 |
| Cd109         | NM_026632.3    | CD109 antigen (Cd109)                                                                  | 1.67 |
| Cd59a         | NM_011285.1    | CD59a antigen (Cd59a)                                                                  | 3.91 |
| Cd82          | NM_011287.1    | CD82 antigen (Cd82)                                                                    | 1.67 |
| Cdc42ep4      | NM_009076.1    | CDC42 effector protein (Rho GTPase binding) 4 (Cdc42ep4)                               | 2.24 |
| Cdo1          | NM_009438.3    | cysteine dioxygenase 1, cytosolic (Cdo1)                                               | 2.18 |
| Celsr1        | NM_009077.2    | cadherin, EGF LAG seven-pass G-type receptor 1 (flamingo homolog, Drosophila) (Celsr1) | 1.85 |
| Cercam        | NM_029751.3    | cerebral endothelial cell adhesion molecule (Cercam)                                   | 1.51 |
| Cetn4         | NM_009078.1    | centrin 4 (Cetn4)                                                                      | 2.47 |
| Cfp           | NM_022891.2    | complement factor properdin (Cfp)                                                      | 1.52 |
| Chi3l1        | NM_024218.2    | chitinase 3-like 1 (Chi3l1)                                                            | 2.26 |
| Chka          | NM_009080.2    | choline kinase alpha (Chka), transcript variant 2                                      | 1.86 |
| Ckap5         | NM_011289.1    | cytoskeleton associated protein 5 (Ckap5)                                              | 1.56 |
| Cldn11        | NM_011975.3    | claudin 11 (Cldn11)                                                                    | 1.73 |
| Clip4         | NM_009081      | CAP-GLY domain containing linker protein family, member 4 (Clip4)                      | 1.53 |
| Clk1          | NM_009082.2    | CDC-like kinase 1 (Clk1), transcript variant 1                                         | 1.51 |
| Clk4          | NM_013762.1    | CDC like kinase 4 (Clk4)                                                               | 1.53 |
| Cml1          | NM_009083.2    | camello-like 1 (Cml1)                                                                  | 2.41 |
| Cml4          | NM_053257.1    | camello-like 4 (Cml4)                                                                  | 2.19 |
| Cmtm5         | NM_172086      | CKLF-like MARVEL transmembrane domain containing 5 (Cmtm5)                             | 4.93 |
| Cnp           | NM_026724.1    | 2',3'-cyclic nucleotide 3' phosphodiesterase (Cnp)                                     | 2.20 |
| Cnp1          | NM_025592.3    |                                                                                        | 1.63 |
| Col22a1       | NM_019865.2    | PREDICTED: collagen, type XXII, alpha 1, transcript variant 3 (Col22a1)                | 2.65 |
| Col23a1       | NM_025589.1    | procollagen, type XXIII, alpha 1 (Col23a1)                                             | 1.53 |
| Col8a2        | NM_026069.2    |                                                                                        | 1.79 |
| Copg2as2      | NM_001048057.1 |                                                                                        | 1.63 |
| Cpe           | NM_026055.1    |                                                                                        | 1.80 |
| Cryab         | NM_024212.2    | crystallin, alpha B (Cryab)                                                            | 2.68 |

|               |                |                                                                                              |      |
|---------------|----------------|----------------------------------------------------------------------------------------------|------|
| Crygs         | NM_018860.3    | crystallin, gamma S (Crygs)                                                                  | 1.70 |
| Csgalnact1    | NM_025433.3    | chondroitin sulfate N-acetylgalactosaminyltransferase 1 (Csgalnact1)                         | 1.73 |
| Cspp1         | NM_011292.1    | centrosome and spindle pole associated protein 1 (Cspp1)                                     | 1.67 |
| Cst3          | NM_007475.4    | cystatin C (Cst3)                                                                            | 1.77 |
| Ctdsp2        | NM_018853.3    | CTD (carboxy-terminal domain, RNA polymerase II, polypeptide A) small phosphatase 2 (Ctdsp2) | 1.53 |
| Ctnna2        | NM_026020.4    | catenin (cadherin associated protein), alpha 2 (Ctnna2), transcript variant 2                | 1.95 |
| Ctnna1        | NM_019642.3    | catenin (cadherin associated protein), alpha-like 1 (Ctnna1)                                 | 2.57 |
| Ctsa          | NM_026308.2    | cathepsin A (Ctsa), transcript variant 2                                                     | 3.16 |
| Cxcr4         | NM_023396.4    |                                                                                              | 3.19 |
| Cyhr1         | NM_025963.1    | cysteine and histidine rich 1 (Cyhr1), transcript variant 2                                  | 2.11 |
| Cyp1b1        | NM_013725.3    | cytochrome P450, family 1, subfamily b, polypeptide 1 (Cyp1b1)                               | 2.64 |
| Cyp4f13       | NM_011295.2    | cytochrome P450, family 4, subfamily f, polypeptide 13 (Cyp4f13)                             | 1.79 |
| Cyp4f14       | NM_026533.1    | cytochrome P450, family 4, subfamily f, polypeptide 14 (Cyp4f14)                             | 2.86 |
| Cyp4v3        | NM_009091.1    | cytochrome P450, family 4, subfamily v, polypeptide 3 (Cyp4v3)                               | 2.08 |
| Cyp7b1        | NM_013647.1    | cytochrome P450, family 7, subfamily b, polypeptide 1 (Cyp7b1)                               | 2.17 |
| D030034I04Rik | NM_023133.1    |                                                                                              | 2.25 |
| D0H4S114      | NM_008503.4    | DNA segment, human D4S114 (D0H4S114)                                                         | 5.11 |
| D10Ert610e    | NM_025587.2    | DNA segment, Chr 10, ERATO Doi 610, expressed (D10Ert610e)                                   | 1.87 |
| D16H22S680E   | NM_011297.2    | DNA segment, Chr 16, human D22S680E, expressed (D16H22S680E)                                 | 1.67 |
| D230005E09Rik | NM_024266.3    |                                                                                              | 2.02 |
| D330014H01Rik | NM_013765.1    |                                                                                              | 1.56 |
| D430042O09Rik | NM_001033865.1 | RIKEN cDNA D430042O09 gene (D430042O09Rik)                                                   | 2.15 |
| D4Ert681e     | NM_026467.2    |                                                                                              | 2.51 |
| D5Ert579e     | NM_009093.1    | DNA segment, Chr 5, ERATO Doi 579, expressed (D5Ert579e)                                     | 1.52 |
| D630004N19Rik | NM_012052.1    |                                                                                              | 1.52 |
| D930015E06Rik | NM_016959.2    |                                                                                              | 1.58 |
| D9Ert392e     | NM_009094.1    |                                                                                              | 1.82 |
| Dapk1         | NM_009095.1    | death associated protein kinase 1 (Dapk1), transcript variant 2                              | 1.79 |
| Darc          | NM_009096.2    | Duffy blood group, chemokine receptor (Darc)                                                 | 2.09 |
| Ddb2          | NM_009097.1    | damage specific DNA binding protein 2 (Ddb2)                                                 | 1.59 |
| Ddo           | NM_153587.2    | D-aspartate oxidase (Ddo)                                                                    | 4.35 |
| Ddr1          | NM_011300.2    | discoidin domain receptor family, member 1 (Ddr1), transcript variant 1                      | 2.05 |
| Ddx3y         | NM_009098.2    | DEAD (Asp-Glu-Ala-Asp) box polypeptide 3, Y-linked (Ddx3y)                                   | 1.66 |
| Dhrs1         | NM_029767.2    | dehydrogenase/reductase (SDR family) member 1 (Dhrs1)                                        | 3.90 |
| Dhx32         | NM_133626.2    | DEAH (Asp-Glu-Ala-His) box polypeptide 32 (Dhx32)                                            | 1.66 |
| Dido1         | NM_009103      | death inducer-obliterator 1 (Dido1), transcript variant 1                                    | 1.59 |
| Diras1        | NM_009104.1    | DIRAS family, GTP-binding RAS-like 1 (Diras1)                                                | 1.52 |
| Dixdc1        | NM_199447.2    |                                                                                              | 1.64 |
| Dlgap1        | NM_026041.2    | discs, large (Drosophila) homolog-associated protein 1 (Dlgap1)                              | 1.76 |
| Dm15          | NM_028244.1    |                                                                                              | 1.81 |
| Dnajb13       | NM_145620.4    | DnaJ (Hsp40) related, subfamily B, member 13 (Dnajb13)                                       | 3.02 |
| Dnajb2        | NM_001013381.1 | DnaJ (Hsp40) homolog, subfamily B, member 2 (Dnajb2), transcript variant 2                   | 1.50 |
| Dnajb9        | XM_137041.6    | DnaJ (Hsp40) homolog, subfamily B, member 9 (Dnajb9)                                         | 1.74 |
| Dnajc28       | NM_025546.2    | DnaJ (Hsp40) homolog, subfamily C, member 28 (Dnajc28), transcript variant 2                 | 1.52 |
| Dnali1        | NM_025290.3    | dynein, axonemal, light intermediate polypeptide 1 (Dnali1)                                  | 2.49 |
| Dner          | NM_001081346.1 | delta/notch-like EGF-related receptor (Dner)                                                 | 1.72 |
| Dpysl4        | NM_153457.6    | dihydropyrimidinase-like 4 (Dpysl4)                                                          | 1.97 |
| Dpysl5        | NM_001003930   | dihydropyrimidinase-like 5 (Dpysl5)                                                          | 2.35 |
| Drp2          | NM_177708.5    | dystrophin related protein 2 (Drp2)                                                          | 5.58 |
| Dscr1         | NM_019685.1    |                                                                                              | 1.72 |
| Dtx4          | NM_011304.3    | deltex 4 homolog (Drosophila) (Dtx4)                                                         | 1.55 |
| Dync2li1      | NM_025614.1    | dynein cytoplasmic 2 light intermediate chain 1 (Dync2li1)                                   | 1.96 |
| Dynlrb2       | NM_019743.3    | dynein light chain roadblock-type 2 (Dynlrb2)                                                | 4.93 |
| Dysf          | NM_001042607.1 | dysferlin (Dysf), transcript variant 1                                                       | 3.34 |
| E030030K01Rik | NM_011309.3    |                                                                                              | 1.90 |
| E030049G20Rik | NM_011313.2    | RIKEN cDNA E030049G20 gene (E030049G20Rik), transcript variant 1                             | 1.73 |
| E130203B14Rik | XM_620495.3    | RIKEN cDNA E130203B14 gene (E130203B14Rik)                                                   | 2.68 |
| E130308A19Rik | NM_030692.1    | RIKEN cDNA E130308A19 gene (E130308A19Rik), transcript variant 2                             | 1.58 |
| E330009J07Rik | NM_019748.2    |                                                                                              | 1.66 |
| E430002G05Rik | NM_178280.3    |                                                                                              | 2.03 |
| Ech1          | XM_620286.3    | enoyl coenzyme A hydratase 1, peroxisomal (Ech1)                                             | 1.68 |
| Echdc2        | NM_021788.1    | enoyl Coenzyme A hydratase domain containing 2 (Echdc2)                                      | 2.00 |
| Ednra         | NM_016926.1    | endothelin receptor type A (Ednra)                                                           | 1.84 |
| Ednrb         | NM_025436.1    | endothelin receptor type B (Ednrb)                                                           | 1.51 |
| EG232599      | NM_009127.3    | predicted gene, EG232599 (EG232599)                                                          | 3.28 |
| EG546143      | NM_183216.3    | PREDICTED: predicted gene, EG546143 (EG546143)                                               | 2.35 |
| EG632802      | NM_009130.1    | PREDICTED: predicted gene, EG632802 (EG632802)                                               | 1.95 |
| EG665378      | NM_009162.3    | predicted gene, EG665378 (EG665378)                                                          | 1.90 |
| Emp2          | NM_001099742.1 | epithelial membrane protein 2 (Emp2)                                                         | 1.80 |
| Endod1        | AK002910.1     | endonuclease domain containing 1 (Endod1)                                                    | 2.02 |

|               |                |                                                                                                         |       |
|---------------|----------------|---------------------------------------------------------------------------------------------------------|-------|
| Enpp5         | AK021409.1     | ectonucleotide pyrophosphatase/phosphodiesterase 5 (Enpp5)                                              | 1.51  |
| Entpd2        | AK031598.1     | ectonucleoside triphosphate diphosphohydrolase 2 (Entpd2)                                               | 5.93  |
| Entpd5        | AK050665.1     | ectonucleoside triphosphate diphosphohydrolase 5 (Entpd5), transcript variant 2                         | 1.59  |
| Ephb1         | AK017012.1     | Eph receptor B1 (Ephb1)                                                                                 | 1.81  |
| Ephx2         | XM_358429.1    | epoxide hydrolase 2, cytoplasmic (Ephx2)                                                                | 1.50  |
| F730003H07Rik | AK083573.1     |                                                                                                         | 2.00  |
| F830002E14Rik | AK019418.1     |                                                                                                         | 4.57  |
| Fads3         | AK087461.1     | fatty acid desaturase 3 (Fads3)                                                                         | 1.77  |
| Fah           |                | fumarylacetoacetate hydrolase (Fah)                                                                     | 1.71  |
| Fam102a       | AK076154.1     | family with sequence similarity 102, member A (Fam102a)                                                 | 2.02  |
| Fam134b       | AK081191.1     | family with sequence similarity 134, member B (Fam134b), transcript variant 2                           | 6.45  |
| Fam184a       | NM_172938.2    | family with sequence similarity 184, member A (Fam184a)                                                 | 2.68  |
| Fam20a        | NM_019708.3    | family with sequence similarity 20, member A (Fam20a)                                                   | 1.82  |
| Fank1         | NM_007926.2    | fibronectin type 3 and ankyrin repeat domains 1 (Fank1)                                                 | 1.62  |
| Fas           | NM_008304.2    | Fas (TNF receptor superfamily member 6) (Fas)                                                           | 4.48  |
| Fbxo2         | NM_011520.3    | F-box protein 2 (Fbxo2)                                                                                 | 12.89 |
| Fbxo21        | NM_023374.3    | F-box protein 21 (Fbxo21)                                                                               | 1.52  |
| Fbxo25        | NM_025848.2    | F-box protein 25 (Fbxo25)                                                                               | 1.52  |
| Fbxo32        | NM_138741.1    | F-box protein 32 (Fbxo32)                                                                               | 1.65  |
| Fbxo36        | NM_019951.1    | F-box protein 36 (Fbxo36)                                                                               | 1.52  |
| Fbxo41        | NM_025468.2    | F-box protein 41 (Fbxo41)                                                                               | 1.64  |
| Fbxo44        | NM_024206.4    | F-box protein 44 (Fbxo44)                                                                               | 1.67  |
| Fcgrt         | NM_011343.2    | Fc receptor, IgG, alpha chain transporter (Fcgrt)                                                       | 1.75  |
| Fer1l3        | NM_153055.2    | PREDICTED: fer-1-like 3, myoferlin (C. elegans), transcript variant 1 (Fer1l3)                          | 1.54  |
| Fez1          | NM_001039088.1 | fasciculation and elongation protein zeta 1 (zygin I) (Fez1)                                            | 1.81  |
| Fez2          | NM_009152.2    |                                                                                                         | 1.60  |
| Fhl1          | NM_011976.1    | four and a half LIM domains 1 (Fhl1), transcript variant 1                                              | 2.46  |
| Flrt2         | NM_009154.1    | fibronectin leucine rich transmembrane protein 2 (Flrt2)                                                | 1.51  |
| Fmn2          | NM_172537.2    | formin 2 (Fmn2)                                                                                         | 2.37  |
| Fn3k          | NM_025814.1    | fructosamine 3 kinase (Fn3k), transcript variant 1                                                      | 1.66  |
| Fos           | NM_011354.2    | FBJ osteosarcoma oncogene (Fos)                                                                         | 2.70  |
| Foxj1         | NM_009252.2    | forkhead box J1 (Foxj1)                                                                                 | 1.50  |
| Fstl1         | NM_009254.2    | follicle-stimulating-like 1 (Fstl1)                                                                     | 1.62  |
| Fyco1         | NM_009255.2    | FYVE and coiled-coil domain containing 1 (Fyco1)                                                        | 1.64  |
| Fzd6          | NM_001013370.1 |                                                                                                         | 1.57  |
| Gab1          | AK011630       | growth factor receptor bound protein 2-associated protein 1 (Gab1)                                      | 2.36  |
| Gabarapl1     | NM_030241.2    | gamma-aminobutyric acid (GABA(A)) receptor-associated protein-like 1 (Gabarapl1)                        | 1.54  |
| Gabrb1        | NM_026175.4    | gamma-aminobutyric acid (GABA-A) receptor, subunit beta 1 (Gabrb1)                                      | 1.58  |
| Galnt1        | NM_029157.3    | UDP-N-acetyl-alpha-D-galactosamine:polypeptide N-acetylgalactosaminyltransferase-like 1 (Galnt1)        | 4.11  |
| Ganc          | NM_133953.2    | glucosidase, alpha; neutral C (Ganc)                                                                    | 1.71  |
| Garnl3        | NM_153053.3    | GTPase activating RANGAP domain-like 3 (Garnl3)                                                         | 3.90  |
| Gats          | NM_175102      |                                                                                                         | 1.64  |
| Gbp2          | NM_173374.3    | guanylate binding protein 2 (Gbp2)                                                                      | 4.89  |
| Gca           | NM_009186.4    | granalcin (Gca)                                                                                         | 1.85  |
| Gcnt2         | NM_001093753.1 | glucosaminyl (N-acetyl) transferase 2, I-branching enzyme (Gcnt2), transcript variant 3                 | 1.63  |
| Gdap111       | NM_011358.1    | ganglioside-induced differentiation-associated protein 1-like 1 (Gdap111)                               | 1.58  |
| Gdpd2         | NM_020587.1    | glycerophosphodiester phosphodiesterase domain containing 2 (Gdpd2)                                     | 2.86  |
| Gfap          | NM_025573.3    |                                                                                                         | 16.27 |
| Ggnbp1        | NM_145512.3    | gametogenetin binding protein 1 (Ggnbp1)                                                                | 2.36  |
| Gja1          | NM_027324.4    | gap junction membrane channel protein alpha 1 (Gja1)                                                    | 2.33  |
| Glb1l         | NM_178639.2    |                                                                                                         | 1.58  |
| Glipr2        | NM_011361.1    |                                                                                                         | 2.09  |
| Glud1         | NM_133220.2    |                                                                                                         | 1.75  |
| Glycam1       | NM_028232.1    | glycosylation dependent cell adhesion molecule 1 (Glycam1)                                              | 3.23  |
| Gm973         | NM_199007.1    | gene model 973, (NCBI) (Gm973)                                                                          | 2.59  |
| Gmpr          | NM_030750.2    | guanosine monophosphate reductase (Gmpr)                                                                | 2.12  |
| Gnao1         | NM_024480.3    | guanine nucleotide binding protein, alpha O (Gnao1), transcript variant A                               | 1.62  |
| Got1l1        | NM_019464.2    | glutamic-oxaloacetic transaminase 1-like 1 (Got1l1)                                                     | 1.63  |
| Gpam          | NM_139302.1    | glycerol-3-phosphate acyltransferase, mitochondrial (Gpam), nuclear gene encoding mitochondrial protein | 1.98  |
| Gpld1         | NM_177364.3    | glycosylphosphatidylinositol specific phospholipase D1 (Gpld1)                                          | 1.54  |
| Gpm6b         | NM_011368.3    |                                                                                                         | 1.58  |
| Gpr123        | NM_175259.4    | G protein-coupled receptor 123 (Gpr123)                                                                 | 1.64  |
| Gpr137b-ps    | NM_009171      | G protein-coupled receptor 137B, pseudogene (Gpr137b-ps), non-coding RNA.                               | 1.60  |
| Gpr17         | NM_001077596.1 | G protein-coupled receptor 17 (Gpr17)                                                                   | 1.72  |
| Gpr23         | NM_172257.3    | G protein-coupled receptor 23 (Gpr23)                                                                   | 2.09  |
| Gpr37l1       | NM_001081337.1 | G protein-coupled receptor 37-like 1 (Gpr37l1)                                                          | 2.24  |
| Gprc5b        | NM_022432.3    | G protein-coupled receptor, family C, group 5, member B (Gprc5b)                                        | 2.00  |

|            |                |                                                                                       |       |
|------------|----------------|---------------------------------------------------------------------------------------|-------|
| Gpx1       | NM_153056.1    | glutathione peroxidase 1 (Gpx1)                                                       | 2.17  |
| Grhpr      | NM_013929.1    | glyoxylate reductase/hydroxypyruvate reductase (Grhpr)                                | 1.62  |
| Gria1      | NM_001039090.1 | glutamate receptor, ionotropic, AMPA1 (alpha 1) (Gria1)                               | 5.29  |
| Grk4       | NM_028151.2    | G protein-coupled receptor kinase 4 (Grk4), transcript variant 1                      | 1.52  |
| Gsta3      | NM_145468.1    | glutathione S-transferase, alpha 3 (Gsta3), transcript variant 2                      | 1.70  |
| Gsta4      | NM_153567.1    | glutathione S-transferase, alpha 4 (Gsta4)                                            | 1.73  |
| H13        | NM_013612.1    | histocompatibility 13 (H13)                                                           | 1.98  |
| H2-D1      | NM_009194.2    | histocompatibility 2, D region locus 1 (H2-D1)                                        | 1.53  |
| H3f3b      | NM_030683      | PREDICTED: H3 histone, family 3B (H3f3b)                                              | 1.62  |
| Hbp1       | XM_147213.1    |                                                                                       | 1.63  |
| Hc         | NM_025807.1    | hemolytic complement (Hc)                                                             | 2.00  |
| Hdc        | NM_054087.2    | histidine decarboxylase (Hdc)                                                         | 2.58  |
| Hexim1     | NM_018861.2    | hexamethylene bis-acetamide inducible 1 (Hexim1)                                      | 1.50  |
| Hey1       | NM_019687.3    | hairy/enhancer-of-split related with YRPW motif 1 (Hey1)                              | 1.65  |
| Hhat1      | NM_024211.2    | hedgehog acyltransferase-like (Hhat1)                                                 | 1.62  |
| Hist1h2ac  | NM_001081048.1 | histone cluster 1, H2ac (Hist1h2ac)                                                   | 1.52  |
| Hist1h2be  | NM_026071.2    | histone cluster 1, H2be (Hist1h2be)                                                   | 2.76  |
| Hist2h2aa1 | NM_146118.2    | histone cluster 2, H2aa1 (Hist2h2aa1)                                                 | 1.88  |
| Hist2h2aa2 | NM_133668.2    | histone cluster 2, H2aa2 (Hist2h2aa2)                                                 | 1.88  |
| Hopx       | NM_144793.1    | HOP homeobox (Hopx)                                                                   | 5.50  |
| Hrsp12     | NM_026542.1    | heat-responsive protein 12 (Hrsp12)                                                   | 2.59  |
| Hsd3b2     | NM_007451.3    | hydroxy-delta-5-steroid dehydrogenase, 3 beta- and steroid delta-isomerase 2 (Hsd3b2) | 2.47  |
| Hspa2      | NM_022880.1    | heat shock protein 2 (Hspa2), transcript variant 1                                    | 2.20  |
| Hspb8      | NM_023596.3    | heat shock protein 8 (Hspb8)                                                          | 9.69  |
| Htatip2    | NM_011400.2    | HIV-1 tat interactive protein 2, homolog (human) (Htatip2)                            | 1.53  |
| lap        | NM_022885.2    |                                                                                       | 1.63  |
| ld4        | NM_023214.3    | inhibitor of DNA binding 4 (ld4)                                                      | 4.20  |
| ldb2       | NM_175090.3    |                                                                                       | 2.04  |
| lfit3      | NM_078484.1    | interferon-induced protein with tetratricopeptide repeats 3 (lfit3)                   | 1.77  |
| lfitm1     | NM_144893.1    | interferon induced transmembrane protein 1 (lfitm1)                                   | 1.65  |
| lfng2      | NM_177766.2    | interferon gamma receptor 2 (lfng2)                                                   | 2.21  |
| lft122     | NM_175434.3    | intraflagellar transport 122 homolog (Chlamydomonas) (lft122)                         | 1.65  |
| lft81      | NM_024249.4    | intraflagellar transport 81 homolog (Chlamydomonas) (lft81)                           | 1.56  |
| lgfbp5     | NM_175121.3    | insulin-like growth factor binding protein 5 (lgfbp5)                                 | 17.37 |
| lgfbp7     | NM_001012305.1 | insulin-like growth factor binding protein 7 (lgfbp7)                                 | 3.02  |
| lgfbpl1    | NM_139143.2    | insulin-like growth factor binding protein-like 1 (lgfbpl1)                           | 3.81  |
| lgsf11     | NM_008202.2    | immunoglobulin superfamily, member 11 (lgsf11)                                        | 7.57  |
| ligp2      | NM_177388.3    | interferon inducible GTPase 2 (ligp2)                                                 | 1.63  |
| ll1r2      | NM_133891.2    | interleukin 1 receptor, type II (ll1r2)                                               | 1.62  |
| ll6st      | NM_152808.2    | interleukin 6 signal transducer (ll6st)                                               | 2.87  |
| lng4       | NM_027872.3    | inhibitor of growth family, member 4 (lng4)                                           | 1.57  |
| lnpp5k     | NM_018760.1    | inositol polyphosphate 5-phosphatase K (lnpp5k)                                       | 1.56  |
| lnsl6      | XM_147798.4    | insulin-like 6 (lnsl6)                                                                | 1.62  |
| lqcb1      | NM_021530.2    | IQ calmodulin-binding motif containing 1 (lqcb1)                                      | 1.53  |
| lqcg       | NM_178703.2    | IQ motif containing G (lqcg)                                                          | 1.69  |
| ltga3      | NM_009320.3    | integrin alpha 3 (ltga3)                                                              | 2.52  |
| ltgb5      | NM_008135.4    | integrin beta 5 (ltgb5)                                                               | 1.56  |
| ltih3      | NM_011406.1    | inter-alpha trypsin inhibitor, heavy chain 3 (ltih3)                                  | 2.05  |
| ltn2b      | NM_032008.3    | integral membrane protein 2B (ltn2b)                                                  | 2.21  |
| ltpk1      | NM_025531.2    | inositol 1,3,4-triphosphate 5/6 kinase (ltpk1)                                        | 1.53  |
| ltpkb      | NM_025690.3    |                                                                                       | 2.19  |
| Jak1       | NM_016769      | Janus kinase 1 (Jak1)                                                                 | 2.07  |
| Jakmip1    | NM_133716.2    | janus kinase and microtubule interacting protein 1 (Jakmip1)                          | 1.82  |
| Kank4      | NM_019710.1    | KN motif and ankyrin repeat domains 4 (Kank4)                                         | 2.32  |
| Kcna6      | NM_011420.2    |                                                                                       | 4.43  |
| Kcnk1      | NM_022316.1    | potassium channel, subfamily K, member 1 (Kcnk1)                                      | 1.51  |
| Kcnk2      | NM_013870.2    | potassium channel, subfamily K, member 2 (Kcnk2)                                      | 1.64  |
| Kctd5      | NM_026796.1    | potassium channel tetramerisation domain containing 5 (Kctd5)                         | 1.69  |
| Kif21a     | NM_172339.2    | kinesin family member 21A (Kif21a)                                                    | 2.27  |
| Klhdc8b    | NM_009221.2    | kelch domain containing 8B (Klhdc8b)                                                  | 2.21  |
| Kihl26     | NR_002898.1    | kelch-like 26 (Drosophila) (Kihl26), transcript variant 1                             | 1.59  |
| Kndc1      | NM_198214.2    | kinase non-catalytic C-lobe domain (KIND) containing 1 (Kndc1)                        | 4.05  |
| Ky         | NM_001046637.1 | kyphoscoliosis peptidase (Ky)                                                         | 3.35  |
| Lamb2      | NM_009225.2    | laminin, beta 2 (Lamb2)                                                               | 1.82  |
| Lamp2      | NM_009226.4    | lysosomal-associated membrane protein 2 (Lamp2), transcript variant 1                 | 1.68  |
| Lgals3     | NM_026943.1    | lectin, galactose binding, soluble 3 (Lgals3)                                         | 4.42  |
| Lgals4     | NM_026095.4    | lectin, galactose binding, soluble 4 (Lgals4)                                         | 2.34  |
| Lgals8     | XM_892627.2    | lectin, galactose binding, soluble 8 (Lgals8)                                         | 1.60  |
| Lgi3       | NM_009228.1    | leucine-rich repeat LGI family, member 3 (Lgi3)                                       | 1.60  |
| Lgsn       | NM_172951.1    | lengsin, lens protein with glutamine synthetase domain (Lgsn)                         | 1.65  |

|              |                |                                                                                                                                           |      |
|--------------|----------------|-------------------------------------------------------------------------------------------------------------------------------------------|------|
| Lhfp         | NM_025664.5    | lipoma HMGIC fusion partner (Lhfp)                                                                                                        | 1.52 |
| Limk2        | NM_175407.3    | LIM motif-containing protein kinase 2 (Limk2), transcript variant 3                                                                       | 1.94 |
| Lix1         | NM_007706.3    | limb expression 1 homolog (chicken) (Lix1)                                                                                                | 1.96 |
| Ligl1        | NM_019654.2    | lethal giant larvae homolog 1 (Drosophila) (Ligl1)                                                                                        | 1.59 |
| LOC100041388 | NM_013671.2    | PREDICTED: similar to ORF1 (LOC100041388)                                                                                                 | 1.78 |
| LOC100043798 | NM_001034964.1 | PREDICTED: hypothetical protein LOC100043798 (LOC100043798)                                                                               | 1.60 |
| LOC100043821 | NM_021377.1    | PREDICTED: hypothetical protein LOC100043821 (LOC100043821)                                                                               | 2.39 |
| LOC100044124 | NM_030889.2    | PREDICTED: similar to Nedd4 binding protein 2 (LOC100044124)                                                                              | 1.79 |
| LOC100044177 | NM_011436.3    | PREDICTED: hypothetical protein LOC100044177 (LOC100044177)                                                                               | 2.17 |
| LOC100045005 | NM_009234.3    | PREDICTED: similar to Deltex3 (LOC100045005), misc RNA.                                                                                   | 1.84 |
| LOC100045501 | NM_177753.2    | PREDICTED: hypothetical protein LOC100045501 (LOC100045501)                                                                               | 1.82 |
| LOC100045680 | NM_011444.1    | PREDICTED: similar to complement C4 (LOC100045680)                                                                                        | 1.59 |
| LOC100045869 | NM_011448      | PREDICTED: similar to Limb expression 1 homolog (chicken) (LOC100045869)                                                                  | 2.90 |
| LOC100046120 | NM_012031.1    | PREDICTED: similar to clusterin (LOC100046120)                                                                                            | 8.74 |
| LOC100046207 | NM_017407.1    | PREDICTED: similar to Lymphocyte antigen 6H precursor (Ly-6H) (LOC100046207)                                                              | 2.59 |
| LOC100046741 | NM_015773.1    | PREDICTED: similar to red-1 (LOC100046741)                                                                                                | 3.42 |
| LOC100046770 | NM_172561.1    | PREDICTED: similar to histone macroH2A1.2 (LOC100046770)                                                                                  | 1.80 |
| LOC100047126 | NM_010097.2    | PREDICTED: similar to Sctr protein, transcript variant 1 (LOC100047126)                                                                   | 1.66 |
| LOC100047193 | NM_016962.1    | PREDICTED: similar to kinesin family member 9 (LOC100047193), misc RNA.                                                                   | 1.67 |
| LOC100047214 | XM_147847.4    | PREDICTED: similar to PTEN induced putative kinase 1 (LOC100047214)                                                                       | 2.84 |
| LOC100047226 | NM_026470.3    | PREDICTED: hypothetical protein LOC100047226 (LOC100047226), misc RNA.                                                                    | 1.54 |
| LOC100047264 | NM_025565.1    | PREDICTED: hypothetical protein LOC100047264 (LOC100047264)                                                                               | 1.90 |
| LOC100047674 | NM_029701.1    | PREDICTED: similar to solute carrier family 35 (UDP-glucuronic acid/UDP-N-acetylgalactosamine dual transporter), member D1 (LOC100047674) | 1.81 |
| LOC100047738 | NM_001029936.2 | PREDICTED: similar to DENN/MADD domain containing 1A (LOC100047738)                                                                       | 2.03 |
| LOC100047936 | NM_153176.4    | PREDICTED: similar to sortilin-related receptor, LDLR class A repeats-containing (LOC100047936), misc RNA.                                | 2.06 |
| LOC100048083 | NM_011451.2    | PREDICTED: similar to Tect2 (LOC100048083), misc RNA.                                                                                     | 1.75 |
| LOC100048331 | XM_207079.2    | PREDICTED: similar to DnaJ (Hsp40) homolog, subfamily A, member 4 (LOC100048331), misc RNA.                                               | 1.51 |
| LOC100048534 | NM_013675.3    | PREDICTED: similar to D19Erd652e protein (LOC100048534)                                                                                   | 1.54 |
| LOC270589    | NM_025287.2    |                                                                                                                                           | 1.71 |
| LOC331595    | NM_009263.1    |                                                                                                                                           | 1.59 |
| LOC333331    | NM_033524      | PREDICTED: similar to medium-chain acyl-CoA dehydrogenase (LOC333331), misc RNA.                                                          | 1.57 |
| LOC380653    | NM_011898.2    |                                                                                                                                           | 2.05 |
| LOC381000    | NM_145134.2    |                                                                                                                                           | 2.07 |
| LOC381132    | NM_009270.3    |                                                                                                                                           | 1.68 |
| LOC381260    | NM_033218.1    |                                                                                                                                           | 2.02 |
| LOC381738    | XM_977299.1    |                                                                                                                                           | 2.65 |
| LOC381946    | NM_080448.4    |                                                                                                                                           | 1.72 |
| LOC382163    | NM_175347.4    |                                                                                                                                           | 2.60 |
| LOC383154    | NM_009272.2    |                                                                                                                                           | 1.73 |
| LOC385256    | NM_016795.3    |                                                                                                                                           | 2.22 |
| LOC385274    | NM_019684.1    |                                                                                                                                           | 2.10 |
| LOC385825    | NM_026130.1    |                                                                                                                                           | 1.78 |
| LOC385877    | NM_009275.4    |                                                                                                                                           | 1.56 |
| LOC385959    | AK080830       |                                                                                                                                           | 1.54 |
| LOC385992    | NM_175229.3    |                                                                                                                                           | 1.55 |
| LOC386005    | XM_356132.1    |                                                                                                                                           | 2.42 |
| LOC386021    | NM_023464.2    |                                                                                                                                           | 1.69 |
| LOC386078    | NM_026155.1    |                                                                                                                                           | 2.04 |
| LOC386144    | NM_182990.2    |                                                                                                                                           | 1.88 |
| LOC386218    | NM_020491.4    |                                                                                                                                           | 1.62 |
| LOC386256    | NM_009217.1    |                                                                                                                                           | 1.99 |
| LOC386268    | NM_026899.2    |                                                                                                                                           | 1.61 |
| LOC386298    | NM_133726.2    |                                                                                                                                           | 1.56 |
| LOC386360    | NM_009176.2    |                                                                                                                                           | 1.84 |
| LOC633360    | NM_029811.2    | PREDICTED: hypothetical LOC633360 (LOC633360)                                                                                             | 1.88 |
| LOC638935    | NM_145933.3    | PREDICTED: similar to peptidylarginine deiminase, type II (LOC638935)                                                                     | 2.11 |
| LOC667370    | NM_012028.2    | PREDICTED: similar to interferon-induced protein with tetratricopeptide repeats 3 (LOC667370)                                             | 1.81 |
| LOC675572    | NM_009181.1    | PREDICTED: hypothetical LOC675572 (LOC675572)                                                                                             | 3.54 |
| LOC677369    | NM_138672.2    | PREDICTED: similar to Alpha-2-macroglobulin (LOC677369), misc RNA.                                                                        | 2.26 |
| LOC677375    | NM_001077712.1 | PREDICTED: hypothetical LOC677375 (LOC677375)                                                                                             | 2.15 |
| Lrp2         | NM_029682.4    | low density lipoprotein receptor-related protein 2 (Lrp2)                                                                                 | 1.97 |
| Lrrc36       | NM_146258.1    | leucine rich repeat containing 36 (Lrrc36)                                                                                                | 1.61 |
| Lrrc48       | NM_133774.4    | leucine rich repeat containing 48 (Lrrc48)                                                                                                | 1.93 |
| Lrrc51       | NM_199018.1    | PREDICTED: leucine rich repeat containing 51, transcript variant 2 (Lrrc51)                                                               | 2.23 |
| Lrrc8        | NM_025303.2    |                                                                                                                                           | 1.92 |



|           |                |                                                                                                           |      |
|-----------|----------------|-----------------------------------------------------------------------------------------------------------|------|
| Lrrn1     | NM_009285.3    | leucine rich repeat protein 1, neuronal (Lrrn1)                                                           | 1.72 |
| Luc7l2    | NM_009287.4    |                                                                                                           | 1.54 |
| Luzp2     | NM_001081103.1 | leucine zipper protein 2 (Luzp2)                                                                          | 1.66 |
| Lxn       | NM_016737.1    | latexin (Lxn)                                                                                             | 2.25 |
| Lypd1     | NM_133810.2    | Ly6/Plaur domain containing 1 (Lypd1)                                                                     | 1.55 |
| Macrocl1  | NM_175031.3    | MACRO domain containing 1 (Macrocl1)                                                                      | 1.71 |
| Man1c1    | NM_011499.2    |                                                                                                           | 1.54 |
| Map1lc3b  | NM_133789.2    | microtubule-associated protein 1 light chain 3 beta (Map1lc3b)                                            | 1.56 |
| Map3k7ip2 | NM_024222.2    | mitogen-activated protein kinase kinase kinase 7 interacting protein 2 (Map3k7ip2)                        | 2.50 |
| Mapk8ip1  | NM_009294.3    | mitogen activated protein kinase 8 interacting protein 1 (Mapk8ip1)                                       | 1.58 |
| Mapk8ip2  | NM_009295.1    | mitogen-activated protein kinase 8 interacting protein 2 (Mapk8ip2)                                       | 1.53 |
| Mapt      | NM_011507.1    |                                                                                                           | 1.96 |
| March2    | NM_172695.2    | membrane-associated ring finger (C3HC4) 2 (March2)                                                        | 1.75 |
| Matn4     | NM_172294.1    | matrilin 4 (Matn4)                                                                                        | 3.24 |
| Mboat2    | NM_028072.4    | membrane bound O-acyltransferase domain containing 2 (Mboat2)                                             | 1.58 |
| Mdh1b     | NM_133354.1    | malate dehydrogenase 1B, NAD (soluble) (Mdh1b)                                                            | 1.92 |
| Mfsd7b    | NM_019929.3    | major facilitator superfamily domain containing 7B (Mfsd7b)                                               | 2.23 |
| Mgll      | NM_178652.2    | monoglyceride lipase (Mgll)                                                                               | 2.11 |
| Mgst1     | NM_181423.2    | microsomal glutathione S-transferase 1 (Mgst1)                                                            | 1.55 |
| Mia1      | NM_199196.1    |                                                                                                           | 1.68 |
| Mid1ip1   | NM_022030.3    | Mid1 interacting protein 1 (gastrulation specific G12-like (zebrafish)) (Mid1ip1)                         | 1.77 |
| Mks1      | NM_009302.2    | Meckel syndrome, type 1 (Mks1)                                                                            | 1.55 |
| Mlc1      | NM_025932.1    | megalencephalic leukoencephalopathy with subcortical cysts 1 homolog (human) (Mlc1)                       | 1.67 |
| Mif1      | XM_359260.3    |                                                                                                           | 1.57 |
| Mii5      | NM_013681.1    |                                                                                                           | 1.61 |
| Mmd       | NM_019796.4    | monocyte to macrophage differentiation-associated (Mmd)                                                   | 1.51 |
| Mmd2      | NM_183312.3    | monocyte to macrophage differentiation-associated 2 (Mmd2)                                                | 7.44 |
| Mmp2      | NM_030245.2    | matrix metalloproteinase 2 (Mmp2)                                                                         | 1.81 |
| Mmp24     | NM_020024.3    | matrix metalloproteinase 24 (Mmp24)                                                                       | 1.62 |
| Morn5     | BC019668       | MORN repeat containing 5 (Morn5)                                                                          | 1.83 |
| Mpdz      | NM_027139.3    | multiple PDZ domain protein (Mpdz)                                                                        | 1.61 |
| Mpp6      | NM_145968.1    | membrane protein, palmitoylated 6 (MAGUK p55 subfamily member 6) (Mpp6)                                   | 1.70 |
| Mpv17l1   | NM_178598.2    | Mpv17 transgene, kidney disease mutant-like (Mpv17l1)                                                     | 1.61 |
| Mras      | NM_019754.3    | muscle and microspikes RAS (Mras)                                                                         | 1.89 |
| Msi2h     | NM_198294.2    |                                                                                                           | 1.54 |
| Msx1      | NM_011529.1    | homeobox, msh-like 1 (Msx1)                                                                               | 1.63 |
| Mt2       | NM_019636.2    | metallothionein 2 (Mt2)                                                                                   | 2.91 |
| Mt3       | NM_194334.2    | metallothionein 3 (Mt3)                                                                                   | 3.37 |
| Myadm     | NM_009321.2    | myeloid-associated differentiation marker (Myadm)                                                         | 2.08 |
| Mycbpap   | NM_173038.3    | Mycbp associated protein (Mycbpap)                                                                        | 1.66 |
| Myh8      | NM_134011.1    | myosin, heavy polypeptide 8, skeletal muscle, perinatal (Myh8)                                            | 1.57 |
| Myi9      | NM_025355.2    | PREDICTED: myosin, light polypeptide 9, regulatory (Myi9)                                                 | 1.73 |
| Myst4     | NM_025703.2    | MYST histone acetyltransferase monocytic leukemia 4 (Myst4)                                               | 1.51 |
| Myt1      | NM_001039474.1 | myelin transcription factor 1 (Myt1)                                                                      | 1.55 |
| N4bp2     | NM_011544.2    | NEDD4 binding protein 2 (N4bp2)                                                                           | 1.72 |
| Nacc2     | NM_001037877.2 | nucleus accumbens associated 2, BEN and BTB (POZ) domain containing (Nacc2), transcript variant 2         | 1.61 |
| Nbl1      | NM_001079822.1 | neuroblastoma, suppression of tumorigenicity 1 (Nbl1)                                                     | 2.59 |
| Ndr1      | NM_013685.2    | N-myc downstream regulated gene 1 (Ndr1)                                                                  | 1.62 |
| Ndr2      | NM_023755.2    |                                                                                                           | 6.75 |
| Ndr1      | NM_015749.2    |                                                                                                           | 1.66 |
| Nedd4l    | NM_013686.3    | neural precursor cell expressed, developmentally down-regulated gene 4-like (Nedd4l)                      | 1.72 |
| Nedd9     | NM_011565.2    | neural precursor cell expressed, developmentally down-regulated gene 9 (Nedd9)                            | 2.23 |
| Nek1      | NM_009347.1    | PREDICTED: NIMA (never in mitosis gene a)-related expressed kinase 1, transcript variant 4 (Nek1)         | 1.65 |
| Nek5      | NM_011569.2    | NIMA (never in mitosis gene a)-related expressed kinase 5 (Nek5)                                          | 1.55 |
| Nek9      | NM_020584.1    | NIMA (never in mitosis gene a)-related expressed kinase 9 (Nek9)                                          | 1.56 |
| Nfia      | NM_009361.1    |                                                                                                           | 2.00 |
| Ngef      | NM_019678.2    |                                                                                                           | 3.79 |
| Nid2      | NM_011638.3    | nidogen 2 (Nid2)                                                                                          | 3.85 |
| Nisch     | NM_009373.3    |                                                                                                           | 1.67 |
| Nme5      | NM_025920.3    | non-metastatic cells 5, protein expressed in (nucleoside-diphosphate kinase) (Nme5)                       | 5.51 |
| Nme7      | NM_025790.1    | non-metastatic cells 7, protein expressed in (nucleoside-diphosphate kinase) (Nme7), transcript variant 1 | 1.56 |
| Nope      | NM_011568.1    | neighbor of Punc E11 (Nope)                                                                               | 2.29 |
| Npal3     | NM_025435.2    | NIPA-like domain containing 3 (Npal3)                                                                     | 2.61 |

|         |                |                                                                                                                                           |       |
|---------|----------------|-------------------------------------------------------------------------------------------------------------------------------------------|-------|
| Nrbp2   | XM_126580.1    | nuclear receptor binding protein 2 (Nrbp2)                                                                                                | 12.98 |
| Nrxn3   | NM_145585.1    | neurexin III (Nrxn3)                                                                                                                      | 1.68  |
| Nsg2    | NM_144543.1    | neuron specific gene family member 2 (Nsg2)                                                                                               | 2.00  |
| Ntrk2   | NM_011589.1    | neurotrophic tyrosine kinase, receptor, type 2 (Ntrk2), transcript variant 1                                                              | 2.33  |
| Ntsr2   | NM_013899.1    | neurotensin receptor 2 (Ntsr2)                                                                                                            | 6.79  |
| Nuak1   | NM_011590.2    | NUAK family, SNF1-like kinase, 1 (Nuak1)                                                                                                  | 4.56  |
| Nuak2   | NM_025616.3    | NUAK family, SNF1-like kinase, 2 (Nuak2)                                                                                                  | 2.17  |
| Nudt10  | NM_013898.1    | nudix (nucleoside diphosphate linked moiety X)-type motif 10 (Nudt10)                                                                     | 2.22  |
| Nxn     | NM_013897.1    | nucleoredoxin (Nxn)                                                                                                                       | 2.57  |
| Oat     | NM_013896.3    | ornithine aminotransferase (Oat)                                                                                                          | 1.93  |
| Odz4    | NM_011593.2    | odd Oz/ten-m homolog 4 (Drosophila) (Odz4)                                                                                                | 1.51  |
| Ogn     | NM_011594.3    | osteoglycin (Ogn)                                                                                                                         | 1.50  |
| Ogt     | NM_011595.2    | O-linked N-acetylglucosamine (GlcNAc) transferase (UDP-N-acetylglucosamine:polypeptide-N-acetylglucosaminyl transferase) (Ogt)            | 1.64  |
| Olfml1  | NM_080639.3    | olfactomedin-like 1 (Olfml1)                                                                                                              | 2.58  |
| Oplah   | NM_025372.1    | 5-oxoprolinase (ATP-hydrolysing) (Oplah)                                                                                                  | 1.54  |
| Ormdl3  | NM_009387.1    | ORM1-like 3 (S. cerevisiae) (Ormdl3)                                                                                                      | 1.71  |
| Osbp15  | NM_026708.1    |                                                                                                                                           | 1.92  |
| Osmr    | NM_019725.1    | oncostatin M receptor (Osmr)                                                                                                              | 2.08  |
| Pacrg   | NM_053254.2    | Park2 co-regulated (Pacrg)                                                                                                                | 4.38  |
| Pacs2   | NM_172664.2    | phosphofurin acidic cluster sorting protein 2 (Pacs2)                                                                                     | 1.83  |
| Padi2   | NM_025360.1    | peptidyl arginine deiminase, type II (Padi2)                                                                                              | 2.03  |
| Palld   | NM_026211.1    | PREDICTED: palladin, cytoskeletal associated protein, transcript variant 6 (Palld)                                                        | 2.04  |
| Paqr7   | NM_178638.2    | progesterone and adipoQ receptor family member VII (Paqr7)                                                                                | 2.03  |
| Pawr    | NM_134142.1    | PRKC, apoptosis, WT1, regulator (Pawr)                                                                                                    | 1.89  |
| Pcbp4   | NM_173453.2    | poly(rC) binding protein 4 (Pcbp4)                                                                                                        | 1.73  |
| Pcdh10  | NM_178789.4    | protocadherin 10 (Pcdh10), transcript variant 4                                                                                           | 1.56  |
| Pcyt1b  | NM_025460.1    | phosphate cytidyltransferase 1, choline, beta isoform (Pcyt1b), transcript variant 2                                                      | 1.68  |
| Pdgfr1  | NM_133804.2    | platelet-derived growth factor receptor-like (Pdgfr1)                                                                                     | 1.56  |
| Pdlim2  | NM_027215.2    | PDZ and LIM domain 2 (Pdlim2)                                                                                                             | 1.75  |
| Pdlim7  | NM_025387.1    |                                                                                                                                           | 1.66  |
| Pdrg1   | NM_145570.1    | p53 and DNA damage regulated 1 (Pdrg1)                                                                                                    | 1.69  |
| Pdzrn3  | NM_025326.2    | PDZ domain containing RING finger 3 (Pdzrn3)                                                                                              | 3.64  |
| Pea15   | NM_023056.3    |                                                                                                                                           | 1.68  |
| Peli2   | NM_172608.1    |                                                                                                                                           | 2.72  |
| Pfkfb2  | NM_146103.1    | 6-phosphofructo-2-kinase/fructose-2,6-bisphosphatase 2 (Pfkfb2)                                                                           | 1.89  |
| Pfkfb4  | NM_199199.2    | 6-phosphofructo-2-kinase/fructose-2,6-bisphosphatase 4 (Pfkfb4)                                                                           | 2.11  |
| Phf19   | NM_027865.1    | PHD finger protein 19 (Phf19)                                                                                                             | 1.61  |
| Phkg1   | NM_025693.3    | phosphorylase kinase gamma 1 (Phkg1)                                                                                                      | 4.41  |
| Phxr4   | NM_028766.1    |                                                                                                                                           | 2.14  |
| Pik3ip1 | NM_172614.3    | phosphoinositide-3-kinase interacting protein 1 (Pik3ip1)                                                                                 | 2.66  |
| Pitpnm2 | NM_138751.1    | phosphatidylinositol transfer protein, membrane-associated 2 (Pitpnm2)                                                                    | 2.59  |
| Pkmyt1  | NM_028355.3    | protein kinase, membrane associated tyrosine/threonine 1 (Pkmyt1)                                                                         | 1.85  |
| Pkp4    | NM_029478.3    | plakophilin 4 (Pkp4), transcript variant 2                                                                                                | 1.78  |
| Pla2g7  | NM_028264.2    | phospholipase A2, group VII (platelet-activating factor acetylhydrolase, plasma) (Pla2g7)                                                 | 2.58  |
| Plcd1   | NM_001033271.3 |                                                                                                                                           | 1.50  |
| Plcd4   | NM_178936.3    | phospholipase C, delta 4 (Plcd4), transcript variant 1                                                                                    | 2.23  |
| Pld2    | NM_198167.2    | phospholipase D2 (Pld2)                                                                                                                   | 1.53  |
| Plekha4 | NM_028097.3    | pleckstrin homology domain containing, family A (phosphoinositide binding specific) member 4 (Plekha4)                                    | 2.38  |
| Plekhb1 | NM_027415.2    | pleckstrin homology domain containing, family B (evectins) member 1 (Plekhb1)                                                             | 2.86  |
| Plp1    | NM_025915.3    | proteolipid protein (myelin) 1 (Plp1)                                                                                                     | 2.19  |
| Plscr2  | NM_133706.2    | phospholipid scramblase 2 (Plscr2)                                                                                                        | 1.62  |
| Plscr4  | NM_146260.2    |                                                                                                                                           | 1.76  |
| Plxdc1  | NM_001080134.1 | plexin domain containing 1 (Plxdc1)                                                                                                       | 3.12  |
| Plxnb1  | NM_025284.3    | plexin B1 (Plxnb1)                                                                                                                        | 1.54  |
| Pnma2   | NM_021278.2    | paraneoplastic antigen MA2 (Pnma2)                                                                                                        | 2.50  |
| Podxl   | NM_028651.2    | podocalyxin-like (Podxl)                                                                                                                  | 1.64  |
| Ppap2a  | NM_011607.2    | phosphatidic acid phosphatase 2a (Ppap2a), transcript variant 1                                                                           | 1.92  |
| Ppap2b  | NM_134131.1    | phosphatidic acid phosphatase type 2B (Ppap2b)                                                                                            | 2.58  |
| Ppil6   | NM_020275.3    | PREDICTED: peptidylprolyl isomerase (cyclophilin)-like 6, transcript variant 2 (Ppil6)                                                    | 1.65  |
| Ppm2c   | NM_013749.1    | protein phosphatase 2C, magnesium dependent, catalytic subunit (Ppm2c), nuclear gene encoding mitochondrial protein, transcript variant 1 | 4.00  |
| Ppp1r1b | NM_178589.2    | protein phosphatase 1, regulatory (inhibitor) subunit 1B (Ppp1r1b)                                                                        | 2.36  |
| Ppp2r2b | NM_001083587.1 | protein phosphatase 2 (formerly 2A), regulatory subunit B (PR 52), beta isoform (Ppp2r2b), transcript variant 1                           | 2.33  |

|                |                |                                                                                                                           |      |
|----------------|----------------|---------------------------------------------------------------------------------------------------------------------------|------|
| Pqlc3          | NM_172609.3    | PQ loop repeat containing (Pqlc3)                                                                                         | 1.51 |
| Prdx6          | NM_001037170.2 | peroxiredoxin 6 (Prdx6)                                                                                                   | 1.53 |
| Prelp          | NM_138599.4    | proline arginine-rich end leucine-rich repeat (Prelp)                                                                     | 3.44 |
| Prf1           | NM_011623.1    | perforin 1 (pore forming protein) (Prf1)                                                                                  | 3.12 |
| Prkag2         | NM_011627.3    | protein kinase, AMP-activated, gamma 2 non-catalytic subunit (Prkag2)                                                     | 1.86 |
| Prkcdpb        | NM_009415.1    | protein kinase C, delta binding protein (Prkcdpb)                                                                         | 1.69 |
| Prkcq          | NM_022314.2    |                                                                                                                           | 1.52 |
| Prnp           | NM_001001491.1 | prion protein (Prnp)                                                                                                      | 1.83 |
| Prodh          | NM_182839.1    |                                                                                                                           | 1.63 |
| Prom           | NM_026481.2    |                                                                                                                           | 2.59 |
| Prosapip1      | NM_133780.2    | ProSAPIP1 protein (Prosapip1)                                                                                             | 1.79 |
| Psap           | NM_176842.2    | prosaposin (Psap)                                                                                                         | 1.55 |
| Psd2           | NM_013837.1    | pleckstrin and Sec7 domain containing 2 (Psd2)                                                                            | 8.26 |
| Psg23          | NM_028109.3    | pregnancy-specific glycoprotein 23 (Psg23)                                                                                | 1.58 |
| Psm5           | AK089281       | proteasome (prosome, macropain) 26S subunit, non-ATPase, 5 (Psm5)                                                         | 1.53 |
| Ptpre          | NM_011632.2    | protein tyrosine phosphatase, receptor type, E (Ptpre)                                                                    | 1.99 |
| Punc           | NM_009423.3    | putative neuronal cell adhesion molecule (Punc)                                                                           | 1.94 |
| Pvalb          | NM_172406.2    | parvalbumin (Pvalb)                                                                                                       | 2.94 |
| Pygb           | NM_028173.1    | brain glycogen phosphorylase (Pygb)                                                                                       | 5.69 |
| Rab11b         | NM_026508.2    | RAB11B, member RAS oncogene family (Rab11b)                                                                               | 2.14 |
| Rab11fip4      | NM_001024206.1 |                                                                                                                           | 2.44 |
| Rab32          | NM_021789.2    | RAB32, member RAS oncogene family (Rab32)                                                                                 | 1.74 |
| Rab36          | NM_133977.2    |                                                                                                                           | 1.54 |
| Rab3d          | NM_144551.3    | RAB3D, member RAS oncogene family (Rab3d)                                                                                 | 1.76 |
| Rab6b          | NM_030706.1    |                                                                                                                           | 1.61 |
| Rabl2a         | NM_009054.2    | RAB, member of RAS oncogene family-like 2A (Rabl2a)                                                                       | 1.82 |
| Rage           | NM_011588.2    | renal tumor antigen (Rage)                                                                                                | 1.77 |
| Ralgsps1       | NM_025863.2    |                                                                                                                           | 2.13 |
| Rapgef3        | NM_178110.2    | Rap guanine nucleotide exchange factor (GEF) 3 (Rapgef3)                                                                  | 1.91 |
| Rarres1        | NM_053100.1    | PREDICTED: retinoic acid receptor responder (tazarotene induced) 1 (Rarres1)                                              | 1.74 |
| Rassf4         |                | Ras association (RalGDS/AF-6) domain family member 4 (Rassf4)                                                             | 5.14 |
| Rdh5           | NM_133975.4    | retinol dehydrogenase 5 (Rdh5)                                                                                            | 3.26 |
| Reln           | XM_912265.2    | reelin (Reln)                                                                                                             | 5.51 |
| Retsat         | NM_011640.2    | retinol saturase (all trans retinol 13,14 reductase) (Retsat)                                                             | 1.85 |
| Rftn2          | NM_001025246.1 | raftlin family member 2 (Rftn2)                                                                                           | 2.34 |
| Rfx2           | NM_178111.3    | regulatory factor X, 2 (influences HLA class II expression) (Rfx2)                                                        | 3.81 |
| Rgl2           | NM_012035.2    | ral guanine nucleotide dissociation stimulator-like 2 (Rgl2)                                                              | 1.59 |
| Rgma           | AK036590       | RGM domain family, member A (Rgma)                                                                                        | 2.50 |
| Rgs2           | NM_001077364.1 |                                                                                                                           | 1.89 |
| Rgs4           | NM_023910.5    | regulator of G-protein signaling 4 (Rgs4)                                                                                 | 1.58 |
| Rhbdl2         | NM_025677.2    | rhomboid, veinlet-like 2 (Drosophila) (Rhbdl2)                                                                            | 2.24 |
| Rhob           | NM_025537.3    | ras homolog gene family, member B (Rhob)                                                                                  | 1.70 |
| Rhpn1          | NM_021884.3    | rhophilin, Rho GTPase binding protein 1 (Rhpn1)                                                                           | 1.57 |
| Rhpn2          | NM_173007.3    | rhophilin, Rho GTPase binding protein 2 (Rhpn2)                                                                           | 2.31 |
| Rin2           | NM_145928.1    | Ras and Rab interactor 2 (Rin2)                                                                                           | 1.53 |
| Rnase1         | NM_197996.2    | ribonuclease, RNase A family, 1 (pancreatic) (Rnase1)                                                                     | 3.94 |
| Rnf182         | NM_028841.2    | ring finger protein 182 (Rnf182)                                                                                          | 1.62 |
| Rpgr           | NM_019793.2    | retinitis pigmentosa GTPase regulator (Rpgr)                                                                              | 1.81 |
| Rps6ka5        | NM_019656.3    | ribosomal protein S6 kinase, polypeptide 5 (Rps6ka5)                                                                      | 1.59 |
| Rsad1          | NM_138631.1    | radical S-adenosyl methionine domain containing 1 (Rsad1)                                                                 | 1.53 |
| Rshl3          | NM_009437.4    | PREDICTED: radial spokehead-like 3 (Rshl3)                                                                                | 3.47 |
| Rsph1          | XM_001476544.1 | radial spoke head 1 homolog (Chlamydomonas) (Rsph1)                                                                       | 2.48 |
| Rtn1           | NM_009441.1    | reticulon 1 (Rtn1), transcript variant 1                                                                                  | 2.13 |
| S100a1         | NM_028235.1    | S100 calcium binding protein A1 (S100a1)                                                                                  | 1.70 |
| S100a6         | XM_127105.8    | S100 calcium binding protein A6 (calcyclin) (S100a6)                                                                      | 3.10 |
| Samd9l         | NM_198311.1    | PREDICTED: sterile alpha motif domain containing 9-like, transcript variant 1 (Samd9l)                                    | 1.93 |
| Scd4           | NM_027412.3    | stearoyl-coenzyme A desaturase 4 (Scd4)                                                                                   | 4.59 |
| Scg3           | NM_133923.3    | secretogranin III (Scg3)                                                                                                  | 3.71 |
| Scg5           | NM_021324.4    | secretogranin V (Scg5)                                                                                                    | 1.57 |
| Scgb1c1        | NM_053273.2    | secretoglobin, family 1C, member 1 (Scgb1c1)                                                                              | 1.99 |
| scl0002255.1_1 | NM_175274.3    |                                                                                                                           | 2.10 |
| scl0002540.1_6 | NM_011653.2    |                                                                                                                           | 2.29 |
| scl0003799.1_2 | XM_147357.1    |                                                                                                                           | 1.55 |
| Sdc2           | NM_146116.1    | syndecan 2 (Sdc2)                                                                                                         | 1.76 |
| Sema4g         | NM_011655.4    | sema domain, immunoglobulin domain (Ig), transmembrane domain (TM) and short cytoplasmic domain, (semaphorin) 4G (Sema4g) | 1.78 |
| Sema6d         | NM_026473.2    | sema domain, transmembrane domain (TM), and cytoplasmic domain, (semaphorin) 6D (Sema6d), transcript variant 1            | 2.51 |
| Sept3          | NM_019676.1    | septin 3 (Sept3)                                                                                                          | 1.56 |
| Serpina3n      | NM_134024.2    | serine (or cysteine) peptidase inhibitor, clade A, member 3N (Serpina3n)                                                  | 2.37 |

|           |                |                                                                                                     |      |
|-----------|----------------|-----------------------------------------------------------------------------------------------------|------|
| Serpinb6a | NM_172745.2    | serine (or cysteine) peptidase inhibitor, clade B, member 6a (Serpinb6a)                            | 2.28 |
| Sesn1     | NM_138628.1    | sestrin 1 (Sesn1)                                                                                   | 2.18 |
| Sft2d2    | NM_011660.3    | SFT2 domain containing 2 (Sft2d2)                                                                   | 1.53 |
| Sfxn5     | NM_025334.3    | sideroflexin 5 (Sfxn5)                                                                              | 2.75 |
| Sh3bp5l   | NM_001009935.2 | SH3 binding domain protein 5 like (Sh3bp5l)                                                         | 1.57 |
| Shisa4    | NM_025299.1    | shisa homolog 4 ( <i>Xenopus laevis</i> ) (Shisa4)                                                  | 1.54 |
| Shroom3   | NM_178604.3    | shroom family member 3 (Shroom3), transcript variant 3                                              | 1.92 |
| Sidt2     | NM_020557.3    | SID1 transmembrane family, member 2 (Sidt2)                                                         | 1.53 |
| Sirt2     | NM_021288.3    | sirtuin 2 (silent mating type information regulation 2, homolog) 2 ( <i>S. cerevisiae</i> ) (Sirt2) | 2.09 |
| Sirt7     | NR_000040.1    | sirtuin 7 (silent mating type information regulation 2, homolog) 7 ( <i>S. cerevisiae</i> ) (Sirt7) | 1.53 |
| Slc11a1   | NM_024187      | solute carrier family 11 (proton-coupled divalent metal ion transporters), member 1 (Slc11a1)       | 1.67 |
| Slc14a2   | NM_133671.1    |                                                                                                     | 1.64 |
| Slc15a2   | NM_028283.2    |                                                                                                     | 2.19 |
| Slc16a9   | NM_009457.3    | solute carrier family 16 (monocarboxylic acid transporters), member 9 (Slc16a9)                     | 1.82 |
| Slc22a4   | NM_016682.2    | solute carrier family 22 (organic cation transporter), member 4 (Slc22a4)                           | 2.39 |
| Slc25a18  | NM_026872.1    | solute carrier family 25 (mitochondrial carrier), member 18 (Slc25a18)                              | 1.54 |
| Slc29a3   | NM_026454.3    | solute carrier family 29 (nucleoside transporters), member 3 (Slc29a3)                              | 1.58 |
| Slc2a1    | NM_025985.4    | solute carrier family 2 (facilitated glucose transporter), member 1 (Slc2a1)                        | 1.63 |
| Slc35a2   | NM_016786.3    | solute carrier family 35 (UDP-galactose transporter), member 2 (Slc35a2)                            | 1.53 |
| Slc38a2   | NM_145578.1    | solute carrier family 38, member 2 (Slc38a2)                                                        | 2.94 |
| Slc39a12  | NM_027315.3    | solute carrier family 39 (zinc transporter), member 12 (Slc39a12)                                   | 4.37 |
| Slc44a1   | NM_026024.2    | solute carrier family 44, member 1 (Slc44a1)                                                        | 1.61 |
| Slc44a2   | NM_133907.3    | solute carrier family 44, member 2 (Slc44a2)                                                        | 2.78 |
| Slc46a3   | NM_138589.2    | solute carrier family 46, member 3 (Slc46a3)                                                        | 1.56 |
| Slc6a9    | NM_025666.2    | solute carrier family 6 (neurotransmitter transporter, glycine), member 9 (Slc6a9)                  | 2.08 |
| Slc8a1    | NM_019562.1    |                                                                                                     | 1.90 |
| Smoc1     | NM_030724.1    | SPARC related modular calcium binding 1 (Smoc1)                                                     | 2.04 |
| Snph      | NM_011673      | syntaphilin (Snph)                                                                                  | 2.46 |
| Snta1     | NM_139297.4    | syntrophin, acidic 1 (Snta1)                                                                        | 2.05 |
| Sntg2     | NM_201641.2    | syntrophin, gamma 2 (Sntg2)                                                                         | 2.13 |
| Sobp      | NM_145079.2    | sine oculis-binding protein homolog ( <i>Drosophila</i> ) (Sobp)                                    | 1.76 |
| Socs2     | NM_201410.1    | suppressor of cytokine signaling 2 (Socs2)                                                          | 1.55 |
| Sorbs1    | NM_010931.2    | sorbin and SH3 domain containing 1 (Sorbs1), transcript variant 5                                   | 2.53 |
| Sorl1     | NM_144873.2    | sortilin-related receptor, LDLR class A repeats-containing (Sorl1)                                  | 2.05 |
| Sox21     | NM_013881.3    | SRY-box containing gene 21 (Sox21)                                                                  | 1.68 |
| Sox9      | NM_011677.2    |                                                                                                     | 2.63 |
| Spag1     | NM_009477.1    | sperm associated antigen 1 (Spag1)                                                                  | 1.83 |
| Spag6     | NM_025650.2    | sperm associated antigen 6 (Spag6)                                                                  | 2.19 |
| Sparcl1   | NM_025407.2    | SPARC-like 1 (mast9, hevin) (Sparcl1)                                                               | 1.78 |
| Spata13   | NM_025899.2    |                                                                                                     | 1.63 |
| Spnb1     | NM_025641.3    | spectrin beta 1 (Spnb1)                                                                             | 1.57 |
| Spop      | NM_009479.2    | speckle-type POZ protein (Spop)                                                                     | 2.15 |
| Srgap3    | NM_146144.2    | SLIT-ROBO Rho GTPase activating protein 3 (Srgap3)                                                  | 3.17 |
| Srl       | NM_138592.3    | sarcalumenin (Srl)                                                                                  | 2.44 |
| Srpk3     | NM_133857.3    | serine/arginine-rich protein specific kinase 3 (Srpk3)                                              | 1.56 |
| Srr       | NM_030180.2    |                                                                                                     | 1.82 |
| Sstr2     | NM_001013378.1 |                                                                                                     | 1.97 |
| St5       | NM_026031.3    | suppression of tumorigenicity 5 (St5), transcript variant 2                                         | 1.97 |
| St8sia2   | NM_013840.2    | ST8 alpha-N-acetyl-neuraminide alpha-2,8-sialyltransferase 2 (St8sia2)                              | 2.30 |
| Stard13   | NM_009498.3    | StAR-related lipid transfer (START) domain containing 13 (Stard13)                                  | 1.54 |
| Stard8    | NM_016796.2    | START domain containing 8 (Stard8)                                                                  | 3.62 |
| Stim1     | NM_013933.2    | stromal interaction molecule 1 (Stim1)                                                              | 1.51 |
| Stk36     | NM_019806.5    | serine/threonine kinase 36 (fused homolog, <i>Drosophila</i> ) (Stk36)                              | 2.17 |
| Sulf1     | NM_011690.2    | sulfatase 1 (Sulf1)                                                                                 | 2.11 |
| Syap1     | NM_139307.2    | synapse associated protein 1 (Syap1)                                                                | 2.68 |
| Syn2      | NM_173016.3    | synapsin II (Syn2)                                                                                  | 1.88 |
| Synm      | NM_020505.2    | synemin, intermediate filament protein (Synm), transcript variant 3                                 | 1.69 |
| Tagln3    | NM_011692.2    | transgelin 3 (Tagln3)                                                                               | 2.34 |
| Tbc1d2b   | NM_011694.3    | TBC1 domain family, member 2B (Tbc1d2b)                                                             | 1.64 |
| Tbcel     | NM_011695.2    | tubulin folding cofactor E-like (Tbcel)                                                             | 2.25 |
| Tceal6    | NM_011696.1    | transcription elongation factor A (SII)-like 6 (Tceal6)                                             | 1.75 |
| Tcf25     | NM_009505.3    | transcription factor 25 (basic helix-loop-helix) (Tcf25), transcript variant 1                      | 1.54 |
| Tcf3      | NM_011697.2    | transcription factor 3 (Tcf3), transcript variant 1                                                 | 1.56 |
| Tcfcp2l1  | NM_009506.2    | transcription factor CP2-like 1 (Tcfcp2l1)                                                          | 1.82 |
| Tecta     | NM_009507.3    | tectorin alpha (Tecta)                                                                              | 1.85 |
| Tekt1     | NM_178600.2    | tektin 1 (Tekt1)                                                                                    | 1.81 |
| Terf2ip   | NM_027121.3    | telomeric repeat binding factor 2, interacting protein (Terf2ip)                                    | 1.73 |
| Tgm2      | NM_013703.1    | transglutaminase 2, C polypeptide (Tgm2)                                                            | 1.56 |

|         |                |                                                                                                 |      |
|---------|----------------|-------------------------------------------------------------------------------------------------|------|
| Thra    | NM_019780.1    |                                                                                                 | 1.57 |
| Timp2   | NM_027338.1    | tissue inhibitor of metalloproteinase 2 (Timp2)                                                 | 2.91 |
| Timp3   | NM_177876.4    | tissue inhibitor of metalloproteinase 3 (Timp3)                                                 | 1.59 |
| Tmem108 | NM_139061.3    | transmembrane protein 108 (Tmem108)                                                             | 1.82 |
| Tmem117 | AK039554       | transmembrane protein 117 (Tmem117)                                                             | 1.54 |
| Tmem166 | NM_172767.2    | transmembrane protein 166 (Tmem166)                                                             | 1.52 |
| Tmem25  | NM_153423      | transmembrane protein 25 (Tmem25)                                                               | 1.83 |
| Tmem43  | NM_021714.3    | transmembrane protein 43 (Tmem43)                                                               | 1.58 |
| Tmem47  | NM_145218.3    | transmembrane protein 47 (Tmem47)                                                               | 4.09 |
| Tmie    | NM_027963.2    | transmembrane inner ear (Tmie)                                                                  | 2.85 |
| Tmtc4   | XM_917905.3    | transmembrane and tetratricopeptide repeat containing 4 (Tmtc4)                                 | 1.55 |
| Tns3    | NM_027740.3    | tensin 3 (Tns3)                                                                                 | 1.66 |
| Tpbg    | NM_146039.3    | trophoblast glycoprotein (Tpbg)                                                                 | 1.81 |
| Tppp    | NM_027725.2    | tubulin polymerization promoting protein (Tppp)                                                 | 1.57 |
| Tppp3   | NM_134139.1    | tubulin polymerization-promoting protein family member 3 (Tppp3)                                | 2.00 |
| Tprkb   | NM_028599.1    | Tp53rk binding protein (Tprkb)                                                                  | 2.73 |
| Traf1   | NM_030234.2    |                                                                                                 | 4.89 |
| Trim2   | NM_146254.2    | tripartite motif protein 2 (Trim2)                                                              | 1.57 |
| Trpc7   | NM_029896.1    | transient receptor potential cation channel, subfamily C, member 7 (Trpc7)                      | 1.92 |
| Trps1   | XM_001479426.1 |                                                                                                 | 2.04 |
| Tsc22d3 | NM_198606.1    | TSC22 domain family, member 3 (Tsc22d3), transcript variant 1                                   | 1.58 |
| Tsc22d4 | XM_132006      | TSC22 domain family, member 4 (Tsc22d4)                                                         | 2.00 |
| Tspan14 | NM_145940.2    | tetraspanin 14 (Tspan14)                                                                        | 1.76 |
| Tspan15 | NM_001042565.2 | tetraspanin 15 (Tspan15)                                                                        | 1.89 |
| Tspan17 | NM_021539.4    | tetraspanin 17 (Tspan17)                                                                        | 2.89 |
| Tspan3  | NM_177618.4    | tetraspanin 3 (Tspan3)                                                                          | 1.64 |
| Tspan6  | NM_170779.1    | tetraspanin 6 (Tspan6)                                                                          | 1.65 |
| Tst     | NM_177327.3    | thiosulfate sulfurtransferase, mitochondrial (Tst), nuclear gene encoding mitochondrial protein | 2.23 |
| Ttc28   | NM_133784.2    | PREDICTED: tetratricopeptide repeat domain 28 (Ttc28)                                           | 1.69 |
| Ttc30b  | NM_013753.1    | tetratricopeptide repeat domain 30B (Ttc30b)                                                    | 2.97 |
| Ttc8    | NM_013842.2    | tetratricopeptide repeat domain 8 (Ttc8), transcript variant 2                                  | 1.55 |
| Ttll3   | NM_133216.2    | tubulin tyrosine ligase-like family, member 3 (Ttll3)                                           | 2.79 |
| Ttyh1   | NM_028816.2    | tweety homolog 1 (Drosophila) (Ttyh1), transcript variant 2                                     | 6.19 |
| Ttyh2   | NM_010247.1    | tweety homolog 2 (Drosophila) (Ttyh2)                                                           | 2.91 |
| Tuba1a  | NM_001033237.1 | tubulin, alpha 1A (Tuba1a)                                                                      | 1.52 |
| Tubb2c  | NM_026570.1    | tubulin, beta 2c (Tubb2c)                                                                       | 1.70 |
| Txlnb   | NM_025347.1    | taxilin beta (Txlnb)                                                                            | 1.61 |
| Txnip   | NM_018753.5    | thioredoxin interacting protein (Txnip), transcript variant 1                                   | 2.66 |
| Tyki    | NM_018871.2    |                                                                                                 | 1.86 |
| Ugp2    | NM_011738.1    | UDP-glucose pyrophosphorylase 2 (Ugp2)                                                          | 2.01 |
| Ugt1a10 | NM_011739.2    | UDP glycosyltransferase 1 family, polypeptide A10 (Ugt1a10)                                     | 5.07 |
| Ugt1a6a | NM_145356.3    | UDP glucuronosyltransferase 1 family, polypeptide A6A (Ugt1a6a)                                 | 1.75 |
| Ugt1a6b | NM_025970.1    | UDP glucuronosyltransferase 1 family, polypeptide A6B (Ugt1a6b)                                 | 1.71 |
| Ulk2    | NM_172735.2    | Unc-51 like kinase 2 (C. elegans) (Ulk2)                                                        | 1.55 |
| Uros    | NM_025893.2    | uroporphyrinogen III synthase (Uros)                                                            | 1.51 |
| Usp53   | NM_026025.1    | ubiquitin specific peptidase 53 (Usp53)                                                         | 1.76 |
| Usp54   | NM_026647.2    | ubiquitin specific peptidase 54 (Usp54)                                                         | 1.58 |
| Vamp4   | NM_025883.3    | vesicle-associated membrane protein 4 (Vamp4)                                                   | 1.58 |
| Vasn    | NM_011546.2    | vasorin (Vasn)                                                                                  | 1.76 |
| Vat1l   | NM_178694.3    | vesicle amine transport protein 1 homolog-like (T. californica) (Vat1l)                         | 1.71 |
| Vhl     | NM_011743.2    | von Hippel-Lindau syndrome (Vhl)                                                                | 1.53 |
| Vps37b  | NM_028245.1    | vacuolar protein sorting 37B (yeast) (Vps37b)                                                   | 1.76 |
| Vwa5a   | NM_011749.4    | von Willebrand factor A domain containing 5A (Vwa5a)                                            | 1.65 |
| Wdr16   | NM_172483.1    | WD repeat domain 16 (Wdr16)                                                                     | 1.56 |
| Wdr60   | NM_011751.2    | WD repeat domain 60 (Wdr60)                                                                     | 1.54 |
| Wdr69   | NM_172575.2    | WD repeat domain 69 (Wdr69)                                                                     | 3.44 |
| Wdr78   | AK034574       | WD repeat domain 78 (Wdr78)                                                                     | 2.93 |
| Wipi1   | NM_145600.1    | WD repeat domain, phosphoinositide interacting 1 (Wipi1)                                        | 1.68 |
| Wsb1    | NM_011756.4    | WD repeat and SOCS box-containing 1 (Wsb1), transcript variant 2                                | 1.70 |
| Wwc1    | NM_178679.2    | WW, C2 and coiled-coil domain containing 1 (Wwc1)                                               | 2.78 |
| X99384  | NM_007564.2    | cDNA sequence X99384 (X99384)                                                                   | 2.46 |
| Yeats2  | NM_001081144.1 | YEATS domain containing 2 (Yeats2)                                                              | 1.62 |
| Ypel3   | NM_175751.3    | yippee-like 3 (Drosophila) (Ypel3)                                                              | 2.65 |
| Zcchc18 | NM_175433.4    | zinc finger, CCHC domain containing 18 (Zcchc18), transcript variant 3                          | 3.26 |
| Zer1    | NM_175466.2    | zer-1 homolog (C. elegans) (Zer1)                                                               | 1.51 |
| Zfp277  | NM_001039718.1 | zinc finger protein 277 (Zfp277), transcript variant 1                                          | 1.50 |
| Zfp288  | NM_009572.3    |                                                                                                 | 2.57 |
| Zfp36   | NM_023322.2    | zinc finger protein 36 (Zfp36)                                                                  | 1.50 |
| Zfp36l1 | NM_023162.4    | zinc finger protein 36, C3H type-like 1 (Zfp36l1)                                               | 1.76 |
| Zfp608  | NM_199143.1    | zinc finger protein 608 (Zfp608)                                                                | 1.69 |

|            |             |                                                                                     |      |
|------------|-------------|-------------------------------------------------------------------------------------|------|
| Zfp91-cntf | XM_358311   | zinc finger protein 91, ciliary neurotrophic factor transcription unit (Zfp91-cntf) | 8.90 |
| Zhx1       | NM_025635.1 | zinc fingers and homeoboxes 1 (Zhx1), transcript variant 1                          | 1.84 |
| Zkscan14   | NR_003292.1 | zinc finger with KRAB and SCAN domains 14 (Zkscan14)                                | 1.57 |
| Zxda       | NM_011777.2 | zinc finger, X-linked, duplicated A (Zxda), non-coding RNA.                         | 2.63 |
