# Supplementary material for: miR-30 Family miRNAs Mediate the Effect of Chronic Social Defeat Stress on Hippocampal Neurogenesis in Mouse Depression Model
Source: PubMed Central journal article supplement (PMC6694739; doi:10.3389/fnmol.2019.00188), 2019-08-08
Supplement: Table_8.pdf [file Table_8.pdf]

**Table S8. List of genes, which demonstrated decreased expression (fold change  $\geq 1.5$  and  $p \leq 0.05$ ) in the differentiated cells from an early phase (day 2) when compared with the proliferating neurospheres**

| <u>Gene Symbol</u> | <u>Accession No.</u> | <u>Gene Definition</u>                                                       | <u>Fold Change</u> |
|--------------------|----------------------|------------------------------------------------------------------------------|--------------------|
| 0610007J10Rik      | NM_017380.1          |                                                                              | 0.40               |
| 0610007P14Rik      | NM_001009818.1       | RIKEN cDNA 0610007P14 gene (0610007P14Rik)                                   | 0.63               |
| 0610010E21Rik      | AK018717             | RIKEN cDNA 0610010E21 gene (0610010E21Rik)                                   | 0.59               |
| 0610010F05Rik      | NM_021446.2          |                                                                              | 0.57               |
| 0610012G03Rik      | NM_001033140.3       |                                                                              | 0.56               |
| 1100001F19Rik      | NM_027860            |                                                                              | 0.55               |
| 1110001A07Rik      | NM_025320            | RIKEN cDNA 1110001A07 gene (1110001A07Rik)                                   | 0.56               |
| 1110001C20Rik      | NM_133186            |                                                                              | 0.49               |
| 1110001J03Rik      | XM_124187.1          | RIKEN cDNA 1110001J03 gene (1110001J03Rik)                                   | 0.50               |
| 1110001N06Rik      | NM_025377.1          |                                                                              | 0.62               |
| 1110002E23Rik      | NM_177730            |                                                                              | 0.57               |
| 1110003F05Rik      | NM_025363.2          |                                                                              | 0.54               |
| 1110007L15Rik      | AK003256             | RIKEN cDNA 1110007L15 gene (1110007L15Rik)                                   | 0.55               |
| 1110007M04Rik      | AK003291             | RIKEN cDNA 1110007M04 gene (1110007M04Rik)                                   | 0.33               |
| 1110008B24Rik      |                      |                                                                              | 0.62               |
| 1110008F13Rik      | NM_026269.1          | RIKEN cDNA 1110008F13 gene (1110008F13Rik)                                   | 0.31               |
| 1110008P14Rik      | NM_026742.3          | RIKEN cDNA 1110008P14 gene (1110008P14Rik)                                   | 0.38               |
| 1110012D08Rik      | XM_177016.2          | RIKEN cDNA 1110012D08 gene (1110012D08Rik)                                   | 0.47               |
| 1110018J23Rik      | NM_026124.2          |                                                                              | 0.52               |
| 1110019N10Rik      | NM_198001.1          | RIKEN cDNA 1110019N10 gene (1110019N10Rik)                                   | 0.52               |
| 1110020P15Rik      | NM_178066.2          | RIKEN cDNA 1110020P15 gene (1110020P15Rik)                                   | 0.61               |
| 1110021J02Rik      | NM_172963.3          |                                                                              | 0.57               |
| 1110021L09Rik      | NM_026754.2          | PREDICTED: RIKEN cDNA 1110021L09 gene (1110021L09Rik)                        | 0.64               |
| 1110038B12Rik      | XM_140742.4          | PREDICTED: RIKEN cDNA 1110038B12 gene, transcript variant 6 (1110038B12Rik)  | 0.53               |
| 1110059E24Rik      | NM_026753.1          | RIKEN cDNA 1110059E24 gene (1110059E24Rik)                                   | 0.66               |
| 1110067D22Rik      | NM_197979.2          | RIKEN cDNA 1110067D22 gene (1110067D22Rik)                                   | 0.47               |
| 1190002F15Rik      |                      |                                                                              | 0.53               |
| 1190009E20Rik      | XM_001474669.1       |                                                                              | 0.61               |
| 1200003C05Rik      |                      | RIKEN cDNA 1200003C05 gene (1200003C05Rik)                                   | 0.50               |
| 1500001L15Rik      | XM_922038.2          |                                                                              | 0.67               |
| 1500001M20Rik      | NM_025423.1          | RIKEN cDNA 1500001M20 gene (1500001M20Rik)                                   | 0.58               |
| 1500012F01Rik      | NM_173752.3          | RIKEN cDNA 1500012F01 gene (1500012F01Rik)                                   | 0.64               |
| 1500032D16Rik      |                      | RIKEN cDNA 1500032D16 gene (1500032D16Rik), transcript variant 2             | 0.53               |
| 1500034J01Rik      | XM_147036            | PREDICTED: RIKEN cDNA 1500034J01 gene (1500034J01Rik)                        | 0.61               |
| 1600012H06Rik      | NM_197988.1          | RIKEN cDNA 1600012H06 gene (1600012H06Rik), transcript variant 4             | 0.62               |
| 1700011E24Rik      | NM_001033144.1       | PREDICTED: RIKEN cDNA 1700011E24 gene, transcript variant 2 (1700011E24Rik)  | 0.22               |
| 1700013A01Rik      |                      |                                                                              | 0.59               |
| 1700021F05Rik      | NM_024205.1          | RIKEN cDNA 1700021F05 gene (1700021F05Rik)                                   | 0.62               |
| 1700025G04Rik      | XM_001002205.2       | RIKEN cDNA 1700025G04 gene (1700025G04Rik)                                   | 0.41               |
| 1700027M01Rik      | XM_127738.3          |                                                                              | 0.64               |
| 1700029F09Rik      | NM_026894.1          | PREDICTED: RIKEN cDNA 1700029F09 gene, transcript variant 20 (1700029F09Rik) | 0.39               |
| 1700037H04Rik      | NM_001081005.1       | RIKEN cDNA 1700037H04 gene (1700037H04Rik)                                   | 0.56               |
| 1700041B20Rik      | NM_024283.2          |                                                                              | 0.49               |
| 1700086L19Rik      | NM_025892.1          | PREDICTED: RIKEN cDNA 1700086L19 gene (1700086L19Rik)                        | 0.56               |
| 1700113I22Rik      | NM_001083891.1       | RIKEN cDNA 1700113I22 gene (1700113I22Rik)                                   | 0.50               |
| 1810006K21Rik      | XM_912953.3          | PREDICTED: RIKEN cDNA 1810006K21 gene (1810006K21Rik)                        | 0.50               |
| 1810009A15Rik      | AK028065             | RIKEN cDNA 1810009A15 gene (1810009A15Rik)                                   | 0.65               |
| 1810022K09Rik      | NM_001083882.1       |                                                                              | 0.52               |
| 1810027O10Rik      | XM_001478332.1       |                                                                              | 0.56               |
| 1810035L17Rik      | NM_027040.1          | RIKEN cDNA 1810035L17 gene (1810035L17Rik)                                   | 0.59               |
| 1810055G02Rik      | NM_001081275.1       | RIKEN cDNA 1810055G02 gene (1810055G02Rik)                                   | 0.46               |
| 1810063B05Rik      | XM_128789.5          | RIKEN cDNA 1810063B05 gene (1810063B05Rik)                                   | 0.58               |
| 2010007H12Rik      | AK005934             | RIKEN cDNA 2010007H12 gene (2010007H12Rik)                                   | 0.67               |
| 2010107E04Rik      | XM_994504.1          | RIKEN cDNA 2010107E04 gene (2010107E04Rik)                                   | 0.55               |
| 2010309L07Rik      | NM_029331.2          |                                                                              | 0.60               |
| 2010317E24Rik      | NM_026411.1          |                                                                              | 0.51               |
| 2010321I05Rik      | NM_197990.2          |                                                                              | 0.65               |
| 2010321M09Rik      | NM_183254.1          | RIKEN cDNA 2010321M09 gene (2010321M09Rik), transcript variant 1             | 0.62               |
| 2210411K11Rik      | NM_023544            | RIKEN cDNA 2210411K11 gene (2210411K11Rik)                                   | 0.66               |
| 2210412D01Rik      | NM_029338.3          | RIKEN cDNA 2210412D01 gene (2210412D01Rik)                                   | 0.64               |
| 2310003F16Rik      | XM_919077.2          | RIKEN cDNA 2310003F16 gene (2310003F16Rik)                                   | 0.65               |
| 2310003L22Rik      | NM_001033148.2       | RIKEN cDNA 2310003L22 gene (2310003L22Rik)                                   | 0.57               |
| 2310005E10Rik      | NM_026091.2          | RIKEN cDNA 2310005E10 gene (2310005E10Rik)                                   | 0.60               |
| 2310005N03Rik      | XM_485065            | RIKEN cDNA 2310005N03 gene (2310005N03Rik)                                   | 0.49               |

|               |                |                                                                              |      |
|---------------|----------------|------------------------------------------------------------------------------|------|
| 2310008M10Rik | NM_001033185.1 | RIKEN cDNA 2310008M10 gene (2310008M10Rik)                                   | 0.58 |
| 2310009B15Rik | XM_358420.3    | RIKEN cDNA 2310009B15 gene (2310009B15Rik)                                   | 0.57 |
| 2310014H01Rik | NM_138581.2    | PREDICTED: RIKEN cDNA 2310014H01 gene, transcript variant 3 (2310014H01Rik)  | 0.32 |
| 2310016C08Rik | NM_026865.2    | RIKEN cDNA 2310016C08 gene (2310016C08Rik)                                   | 0.41 |
| 2310016M24Rik | XM_983803.1    | RIKEN cDNA 2310016M24 gene (2310016M24Rik)                                   | 0.57 |
| 2310036D04Rik | NM_172701.2    |                                                                              | 0.53 |
| 2310037I24Rik | NM_025463.2    | RIKEN cDNA 2310037I24 gene (2310037I24Rik)                                   | 0.66 |
| 2310039H08Rik | NM_029631      | RIKEN cDNA 2310039H08 gene (2310039H08Rik)                                   | 0.59 |
| 2310044H10Rik | XM_485210      |                                                                              | 0.52 |
| 2310045K21Rik | XM_109683.4    |                                                                              | 0.58 |
| 2310051F07Rik |                |                                                                              | 0.61 |
| 2310061F22Rik | NM_026958.2    | RIKEN cDNA 2310061F22 gene (2310061F22Rik)                                   | 0.66 |
| 2310079P03Rik | NM_028077.2    |                                                                              | 0.62 |
| 2400010C15Rik | NM_174987.3    |                                                                              | 0.52 |
| 2410003K15Rik | NM_027242.3    |                                                                              | 0.39 |
| 2410015M20Rik | NM_027360.2    | RIKEN cDNA 2410015M20 gene (2410015M20Rik)                                   | 0.63 |
| 2410015N17Rik |                | RIKEN cDNA 2410015N17 gene (2410015N17Rik)                                   | 0.30 |
| 2410016F01Rik | XM_130053.2    |                                                                              | 0.67 |
| 2410016O06Rik |                |                                                                              | 0.65 |
| 2410022L05Rik | NM_175153.3    | RIKEN cDNA 2410022L05 gene (2410022L05Rik)                                   | 0.64 |
| 2510009E07Rik |                | RIKEN cDNA 2510009E07 gene (2510009E07Rik)                                   | 0.63 |
| 2600005C20Rik | NM_029384.1    |                                                                              | 0.48 |
| 2610002D18Rik | NM_133722.1    |                                                                              | 0.64 |
| 2610017I09Rik | XM_901486.2    | PREDICTED: RIKEN cDNA 2610017I09 gene (2610017I09Rik), misc RNA.             | 0.47 |
| 2610019E17Rik | NM_026318.2    |                                                                              | 0.45 |
| 2610024B07Rik | NM_027093.3    |                                                                              | 0.50 |
| 2610024G14Rik | NM_172398.3    | RIKEN cDNA 2610024G14 gene (2610024G14Rik)                                   | 0.60 |
| 2610024H22Rik | NM_025511.2    |                                                                              | 0.62 |
| 2610029G23Rik | NM_025506.2    | RIKEN cDNA 2610029G23 gene (2610029G23Rik)                                   | 0.56 |
| 2610036L11Rik | NM_025857.2    | PREDICTED: RIKEN cDNA 2610036L11 gene, transcript variant 1 (2610036L11Rik)  | 0.26 |
| 2610039C10Rik | NM_025509.2    | RIKEN cDNA 2610039C10 gene (2610039C10Rik)                                   | 0.40 |
| 2610101N10Rik | NM_001081226.1 | RIKEN cDNA 2610101N10 gene (2610101N10Rik)                                   | 0.65 |
| 2610103J23Rik | NM_001082975.1 |                                                                              | 0.61 |
| 2610207P08Rik | XM_001003622.2 |                                                                              | 0.59 |
| 2610307O08Rik | NM_023516.3    | PREDICTED: RIKEN cDNA 2610307O08 gene, transcript variant 12 (2610307O08Rik) | 0.29 |
| 2610510J17Rik | NM_183256.2    | RIKEN cDNA 2610510J17 gene (2610510J17Rik)                                   | 0.39 |
| 2700029M09Rik | NM_175149.3    | PREDICTED: RIKEN cDNA 2700029M09 gene (2700029M09Rik)                        | 0.46 |
| 2700055A20Rik | XM_488563      |                                                                              | 0.62 |
| 2700092H06Rik | NM_133714.2    |                                                                              | 0.56 |
| 2700094K13Rik | NM_025966.3    | RIKEN cDNA 2700094K13 gene (2700094K13Rik), transcript variant 2             | 0.17 |
| 2810025M15Rik | XM_912979.2    | PREDICTED: RIKEN cDNA 2810025M15 gene (2810025M15Rik), misc RNA.             | 0.34 |
| 2810405J04Rik |                | RIKEN cDNA 2810405J04 gene (2810405J04Rik)                                   | 0.53 |
| 2810407C02Rik | NM_197991      | RIKEN cDNA 2810407C02 gene (2810407C02Rik)                                   | 0.62 |
| 2810410M20Rik | AK009823       | RIKEN cDNA 2810410M20 gene (2810410M20Rik)                                   | 0.61 |
| 2810417H13Rik |                | RIKEN cDNA 2810417H13 gene (2810417H13Rik)                                   | 0.16 |
| 2810417K24Rik | NM_153775.1    |                                                                              | 0.42 |
| 2810423A18Rik | AK010232       |                                                                              | 0.49 |
| 2810428I15Rik |                |                                                                              | 0.65 |
| 2900010M23Rik | AK010307       | RIKEN cDNA 2900010M23 gene (2900010M23Rik)                                   | 0.58 |
| 2900060B14Rik | XM_132537.3    |                                                                              | 0.61 |
| 2900060P06Rik | NM_153152.3    |                                                                              | 0.52 |
| 3000004C01Rik | NM_023203.1    | RIKEN cDNA 3000004C01 gene (3000004C01Rik)                                   | 0.41 |
| 3110001D03Rik | NM_022423.1    | RIKEN cDNA 3110001D03 gene (3110001D03Rik)                                   | 0.62 |
| 3110009E18Rik | NM_023633      | RIKEN cDNA 3110009E18 gene (3110009E18Rik)                                   | 0.52 |
| 3110013H01Rik | NM_025556.2    |                                                                              | 0.45 |
| 3110043A19Rik | NM_028596.2    | PREDICTED: RIKEN cDNA 3110043A19 gene (3110043A19Rik)                        | 0.57 |
| 3300001G02Rik | NM_001001881.1 | RIKEN cDNA 3300001G02 gene (3300001G02Rik)                                   | 0.50 |
| 3632451O06Rik | NM_028244      | RIKEN cDNA 3632451O06 gene (3632451O06Rik)                                   | 0.41 |
| 3830612M24    | XM_131720.2    |                                                                              | 0.18 |
| 3930401E15Rik | XR_035175.1    |                                                                              | 0.64 |
| 4631422C13Rik |                | PREDICTED: RIKEN cDNA 4631422C13 gene (4631422C13Rik)                        | 0.64 |
| 4632417K18Rik |                | RIKEN cDNA 4632417K18 gene (4632417K18Rik)                                   | 0.30 |
| 4833424O15Rik | NM_019836.2    | RIKEN cDNA 4833424O15 gene (4833424O15Rik)                                   | 0.46 |
| 4833426J09Rik |                |                                                                              | 0.65 |
| 4833427B12Rik | NM_026312.2    |                                                                              | 0.58 |
| 4930427A07Rik | XM_902349.2    | RIKEN cDNA 4930427A07 gene (4930427A07Rik)                                   | 0.65 |
| 4930461P20Rik | XM_488549.3    | PREDICTED: RIKEN cDNA 4930461P20 gene (4930461P20Rik)                        | 0.63 |
| 4930547N16Rik | NM_025642.1    | RIKEN cDNA 4930547N16 gene (4930547N16Rik)                                   | 0.55 |

|                      |                |                                                                                                             |      |
|----------------------|----------------|-------------------------------------------------------------------------------------------------------------|------|
| <i>4930572J05Rik</i> | NM_026476.1    | RIKEN cDNA 4930572J05 gene (4930572J05Rik)                                                                  | 0.58 |
| <i>4932417H02Rik</i> | NM_026002      | RIKEN cDNA 4932417H02 gene (4932417H02Rik)                                                                  | 0.62 |
| <i>4933401P20Rik</i> | NM_027426.2    |                                                                                                             | 0.64 |
| <i>4933407C03Rik</i> | XM_127746.2    | PREDICTED: RIKEN cDNA 4933407C03 gene, transcript variant 6 (4933407C03Rik)                                 | 0.65 |
| <i>4933407P14Rik</i> | XM_921606.2    |                                                                                                             | 0.62 |
| <i>4933427G23Rik</i> | NM_028131.1    | PREDICTED: RIKEN cDNA 4933427G23 gene (4933427G23Rik), misc RNA.                                            | 0.52 |
| <i>5430417J04Rik</i> | NM_028258.1    |                                                                                                             | 0.63 |
| <i>5530401N12Rik</i> | XM_001474993.1 |                                                                                                             | 0.38 |
| <i>5730410I19Rik</i> | XR_035347.1    | RIKEN cDNA 5730410I19 gene (5730410I19Rik)                                                                  | 0.59 |
| <i>5730427N09Rik</i> | NM_027314      | RIKEN cDNA 5730427N09 gene (5730427N09Rik)                                                                  | 0.57 |
| <i>5730449L18Rik</i> | NM_026528.3    | RIKEN cDNA 5730449L18 gene (5730449L18Rik)                                                                  | 0.65 |
| <i>5730494J16Rik</i> | XM_132529.2    |                                                                                                             | 0.36 |
| <i>5730525O22Rik</i> | NM_001037279.1 |                                                                                                             | 0.60 |
| <i>5730528L13Rik</i> | NM_145144.1    | RIKEN cDNA 5730528L13 gene (5730528L13Rik)                                                                  | 0.65 |
| <i>5830411I20</i>    | XR_035184.1    |                                                                                                             | 0.40 |
| <i>5930416I19Rik</i> |                | RIKEN cDNA 5930416I19 gene (5930416I19Rik)                                                                  | 0.48 |
| <i>6030405A18</i>    | NM_133747.2    |                                                                                                             | 0.59 |
| <i>6230416J20Rik</i> | NM_001040396.2 |                                                                                                             | 0.66 |
| <i>6330549D23Rik</i> | NM_024428.2    | RIKEN cDNA 6330549D23 gene (6330549D23Rik), non-coding RNA.                                                 | 0.51 |
| <i>6330578E17Rik</i> | NM_026515.2    | RIKEN cDNA 6330578E17 gene (6330578E17Rik)                                                                  | 0.56 |
| <i>6332401O19Rik</i> | AK013109       | RIKEN cDNA 6332401O19 gene (6332401O19Rik)                                                                  | 0.64 |
| <i>6430402L23Rik</i> |                |                                                                                                             | 0.41 |
| <i>6430527G18Rik</i> | XM_147329.1    | RIKEN cDNA 6430527G18 gene (6430527G18Rik)                                                                  | 0.37 |
| <i>6430537F04</i>    |                |                                                                                                             | 0.50 |
| <i>6430706D22Rik</i> | XM_484890      | RIKEN cDNA 6430706D22 gene (6430706D22Rik)                                                                  | 0.48 |
| <i>6530418L21Rik</i> | NM_026063.1    | RIKEN cDNA 6530418L21 gene (6530418L21Rik)                                                                  | 0.44 |
| <i>6720458F09Rik</i> | NM_144518.3    | RIKEN cDNA 6720458F09 gene (6720458F09Rik)                                                                  | 0.48 |
| <i>6720463M24Rik</i> | NM_172884      | RIKEN cDNA 6720463M24 gene (6720463M24Rik)                                                                  | 0.52 |
| <i>6720469N11Rik</i> |                |                                                                                                             | 0.52 |
| <i>8030402P03Rik</i> | NM_183095.1    |                                                                                                             | 0.62 |
| <i>8430410K20Rik</i> |                | RIKEN cDNA 8430410K20 gene (8430410K20Rik)                                                                  | 0.65 |
| <i>9430029K10Rik</i> | NM_197959.1    |                                                                                                             | 0.65 |
| <i>9430065L19Rik</i> | AK076147       |                                                                                                             | 0.45 |
| <i>9430080K19Rik</i> | XM_001002726.1 |                                                                                                             | 0.48 |
| <i>9530018I07Rik</i> | NM_025849.2    |                                                                                                             | 0.54 |
| <i>9530058B02Rik</i> | NM_001033167.1 | RIKEN cDNA 9530058B02 gene (9530058B02Rik)                                                                  | 0.58 |
| <i>9530064J02</i>    | NM_028439.1    |                                                                                                             | 0.15 |
| <i>9930014A18Rik</i> | XM_203393.1    |                                                                                                             | 0.47 |
| <i>A230046K03Rik</i> |                | RIKEN cDNA A230046K03 gene (A230046K03Rik)                                                                  | 0.66 |
| <i>A230079E18Rik</i> | AK014074       |                                                                                                             | 0.46 |
| <i>A430005L14Rik</i> | XM_001476479.1 | RIKEN cDNA A430005L14 gene (A430005L14Rik)                                                                  | 0.64 |
| <i>A830059I20Rik</i> | NM_026085.2    |                                                                                                             | 0.33 |
| <i>A930030J18Rik</i> | NM_030093.1    |                                                                                                             | 0.52 |
| <i>AA960436</i>      |                | expressed sequence AA960436 (AA960436)                                                                      | 0.60 |
| <i>Aaas</i>          | NM_026142.1    | achalasia, adrenocortical insufficiency, alacrimia (Aaas)                                                   | 0.63 |
| <i>Aacs</i>          | NM_178141.2    | acetoacetyl-CoA synthetase (Aacs)                                                                           | 0.55 |
| <i>Aadacl1</i>       |                | arylacetamide deacetylase-like 1 (Aadacl1)                                                                  | 0.45 |
| <i>Aard</i>          | AK076210       | alanine and arginine rich domain containing protein (Aard)                                                  | 0.53 |
| <i>Aars</i>          | NM_026486.1    | alanyl-tRNA synthetase (Aars)                                                                               | 0.46 |
| <i>Aarsd1</i>        | NM_001081295.1 | alanyl-tRNA synthetase domain containing 1 (Aarsd1)                                                         | 0.66 |
| <i>Aatk</i>          | XM_984472.1    | apoptosis-associated tyrosine kinase (Aatk)                                                                 | 0.22 |
| <i>Abcb6</i>         | NM_026640.2    | ATP-binding cassette, sub-family B (MDR/TAP), member 6 (Abcb6), nuclear gene encoding mitochondrial protein | 0.56 |
| <i>Abcb7</i>         | AK029315       | PREDICTED: ATP-binding cassette, sub-family B (MDR/TAP), member 7, transcript variant 5 (Abcb7)             | 0.51 |
| <i>Abcf1</i>         |                | ATP-binding cassette, sub-family F (GCN20), member 1 (Abcf1)                                                | 0.63 |
| <i>Abcf2</i>         | NM_027845.1    | ATP-binding cassette, sub-family F (GCN20), member 2 (Abcf2), nuclear gene encoding mitochondrial protein   | 0.60 |
| <i>Abi2</i>          | NM_026127.3    | abl-interactor 2 (Abi2)                                                                                     | 0.57 |
| <i>Acap3</i>         | NM_029425.1    | ArfGAP with coiled-coil, ankyrin repeat and PH domains 3 (Acap3)                                            | 0.36 |
| <i>Acat2</i>         |                | acetyl-Coenzyme A acetyltransferase 2 (Acat2)                                                               | 0.40 |
| <i>Acbd3</i>         | XM_195728      | acyl-Coenzyme A binding domain containing 3 (Acbd3)                                                         | 0.65 |
| <i>Acly</i>          | NM_133923.2    | ATP citrate lyase (Acly)                                                                                    | 0.43 |
| <i>Acn9</i>          | AK015050       |                                                                                                             | 0.65 |
| <i>Aco2</i>          | NM_134041.2    | aconitase 2, mitochondrial (Aco2), nuclear gene encoding mitochondrial protein                              | 0.56 |
| <i>Acot7</i>         | NM_027507.1    | acyl-CoA thioesterase 7 (Acot7)                                                                             | 0.42 |
| <i>Acpl2</i>         | NM_029115.1    | acid phosphatase-like 2 (Acpl2)                                                                             | 0.57 |
| <i>Acsbg1</i>        | XM_001473469.1 | acyl-CoA synthetase bubblegum family member 1 (Acsbg1)                                                      | 0.40 |
| <i>AcsI5</i>         | XM_355576.1    | acyl-CoA synthetase long-chain family member 5 (AcsI5)                                                      | 0.36 |

|                 |                |                                                                                                                                    |      |
|-----------------|----------------|------------------------------------------------------------------------------------------------------------------------------------|------|
| <i>Acss2</i>    | NM_029249.2    | acyl-CoA synthetase short-chain family member 2 ( <i>Acss2</i> )                                                                   | 0.55 |
| <i>Actb</i>     | NM_026353.2    | actin, beta ( <i>Actb</i> )                                                                                                        | 0.52 |
| <i>Actl6a</i>   | NM_198607.1    | actin-like 6A ( <i>Actl6a</i> )                                                                                                    | 0.51 |
| <i>Actr10</i>   | XM_357260.1    | ARP10 actin-related protein 10 homolog ( <i>S. cerevisiae</i> ) ( <i>Actr10</i> )                                                  | 0.57 |
| <i>Actr3</i>    | NM_028898.2    | ARP3 actin-related protein 3 homolog ( <i>yeast</i> ) ( <i>Actr3</i> )                                                             | 0.58 |
| <i>Adam12</i>   | NM_001081025.1 | a disintegrin and metallopeptidase domain 12 (meltrin alpha) ( <i>Adam12</i> )                                                     | 0.21 |
| <i>Adam15</i>   | XM_620624.3    | a disintegrin and metallopeptidase domain 15 (metargidin) ( <i>Adam15</i> ), transcript variant 2                                  | 0.64 |
| <i>Adam17</i>   | AK016608       | a disintegrin and metallopeptidase domain 17 ( <i>Adam17</i> )                                                                     | 0.58 |
| <i>Adamts19</i> | XM_001004724.2 | a disintegrin-like and metallopeptidase (reprolysin type) with thrombospondin type 1 motif, 19 ( <i>Adamts19</i> )                 | 0.43 |
| <i>Adamts4</i>  | XM_129929.1    |                                                                                                                                    | 0.36 |
| <i>Adap1</i>    | NM_199019.1    | ArfGAP with dual PH domains 1 ( <i>Adap1</i> )                                                                                     | 0.55 |
| <i>Adm</i>      | NM_027707      | adrenomedullin ( <i>Adm</i> )                                                                                                      | 0.43 |
| <i>Adpgk</i>    | XR_005167.1    |                                                                                                                                    | 0.60 |
| <i>Adprh</i>    | NM_027728.2    | ADP-ribosylarginine hydrolase ( <i>Adprh</i> )                                                                                     | 0.57 |
| <i>Adrb2</i>    | NM_001004146.1 | adrenergic receptor, beta 2 ( <i>Adrb2</i> )                                                                                       | 0.53 |
| <i>Adrbk1</i>   | XM_149592.1    | adrenergic receptor kinase, beta 1 ( <i>Adrbk1</i> )                                                                               | 0.61 |
| <i>Adrm1</i>    | XM_128281      | adhesion regulating molecule 1 ( <i>Adrm1</i> )                                                                                    | 0.62 |
| <i>Adsl</i>     | NM_001003948.1 |                                                                                                                                    | 0.63 |
| <i>Aes</i>      | AK030367       |                                                                                                                                    | 0.63 |
| <i>Afg3l1</i>   | NM_026606.1    | AFG3(ATPase family gene 3)-like 1 ( <i>yeast</i> ) ( <i>Afg3l1</i> )                                                               | 0.64 |
| <i>Agap1</i>    | AK077378       | ArfGAP with GTPase domain, ankyrin repeat and PH domain 1 ( <i>Agap1</i> ), transcript variant 2                                   | 0.53 |
| <i>Agfg1</i>    | AK030671       | ArfGAP with FG repeats 1 ( <i>Agfg1</i> )                                                                                          | 0.60 |
| <i>Agfg2</i>    |                | ArfGAP with FG repeats 2 ( <i>Agfg2</i> ), transcript variant 2                                                                    | 0.53 |
| <i>Agpat6</i>   | NM_145509.1    | 1-acylglycerol-3-phosphate O-acyltransferase 6 (lysophosphatidic acid acyltransferase, zeta) ( <i>Agpat6</i> )                     | 0.64 |
| <i>Ahctf1</i>   |                | AT hook containing transcription factor 1 ( <i>Ahctf1</i> )                                                                        | 0.56 |
| <i>Ahcy</i>     | NM_027442      |                                                                                                                                    | 0.50 |
| <i>Ahcyl1</i>   | NM_178765.3    | S-adenosylhomocysteine hydrolase-like 1 ( <i>Ahcyl1</i> )                                                                          | 0.66 |
| <i>AI413582</i> | NM_025666.1    | expressed sequence AI413582 (AI413582)                                                                                             | 0.56 |
| <i>AI448196</i> | NM_021552.4    |                                                                                                                                    | 0.50 |
| <i>AI481316</i> | NM_025677.1    |                                                                                                                                    | 0.60 |
| <i>AI593442</i> | AK077637       | expressed sequence AI593442 (AI593442), transcript variant 1                                                                       | 0.50 |
| <i>AI851790</i> | AK017789       | expressed sequence AI851790 (AI851790)                                                                                             | 0.55 |
| <i>Aip</i>      | NM_028137.2    | aryl-hydrocarbon receptor-interacting protein ( <i>Aip</i> )                                                                       | 0.63 |
| <i>Ak2</i>      |                | adenylate kinase 2 ( <i>Ak2</i> ), transcript variant 2                                                                            | 0.55 |
| <i>Akap12</i>   | NM_197981.1    | A kinase (PRKA) anchor protein (gravin) 12 ( <i>Akap12</i> )                                                                       | 0.11 |
| <i>Akap7</i>    | NM_177854      | A kinase (PRKA) anchor protein 7 ( <i>Akap7</i> )                                                                                  | 0.47 |
| <i>Akirin1</i>  | AK031346       | akirin 1 ( <i>Akirin1</i> )                                                                                                        | 0.65 |
| <i>Akr1a4</i>   |                | aldo-keto reductase family 1, member A4 (aldehyde reductase) ( <i>Akr1a4</i> )                                                     | 0.63 |
| <i>AL022832</i> | NM_173400      |                                                                                                                                    | 0.63 |
| <i>Alad</i>     | NM_134022.2    | aminolevulinatase, delta-, dehydratase ( <i>Alad</i> )                                                                             | 0.58 |
| <i>Alas1</i>    | XM_358637.1    | aminolevulinic acid synthase 1 ( <i>Alas1</i> )                                                                                    | 0.51 |
| <i>Aldh18a1</i> |                | aldehyde dehydrogenase 18 family, member A1 ( <i>Aldh18a1</i> ), nuclear gene encoding mitochondrial protein, transcript variant 1 | 0.48 |
| <i>Aldoa</i>    | NM_001033301.2 | aldolase A, fructose-bisphosphate ( <i>Aldoa</i> )                                                                                 | 0.63 |
| <i>Alg8</i>     | NR_003619.1    | asparagine-linked glycosylation 8 homolog ( <i>yeast</i> , alpha-1,3-glucosyltransferase) ( <i>Alg8</i> )                          | 0.56 |
| <i>Alg9</i>     | NM_198006.3    | asparagine-linked glycosylation 9 homolog ( <i>yeast</i> , alpha 1,2-mannosyltransferase) ( <i>Alg9</i> )                          | 0.62 |
| <i>Amotl1</i>   | NM_177013.3    | angiomin-like 1 ( <i>Amotl1</i> )                                                                                                  | 0.31 |
| <i>Amph</i>     | AK078178       | amphiphysin ( <i>Amph</i> )                                                                                                        | 0.66 |
| <i>Anapc5</i>   | NM_145836.1    | anaphase-promoting complex subunit 5 ( <i>Anapc5</i> ), transcript variant 1                                                       | 0.66 |
| <i>Angpt2</i>   |                | angiopoietin 2 ( <i>Angpt2</i> )                                                                                                   | 0.05 |
| <i>Ank3</i>     | NM_178689.3    | ankyrin 3, epithelial ( <i>Ank3</i> ), transcript variant 6                                                                        | 0.23 |
| <i>Anln</i>     | NM_172286      | anillin, actin binding protein ( <i>Anln</i> )                                                                                     | 0.21 |
| <i>Anp32e</i>   | NM_172930.2    | acidic (leucine-rich) nuclear phosphoprotein 32 family, member E ( <i>Anp32e</i> )                                                 | 0.34 |
| <i>Anxa3</i>    | NM_198652.1    | annexin A3 ( <i>Anxa3</i> )                                                                                                        | 0.36 |
| <i>Ap2b1</i>    | NM_175398.3    | adaptor-related protein complex 2, beta 1 subunit ( <i>Ap2b1</i> ), transcript variant 1                                           | 0.54 |
| <i>Ap4s1</i>    | NM_177374.2    | adaptor-related protein complex AP-4, sigma 1 ( <i>Ap4s1</i> )                                                                     | 0.67 |
| <i>Apaf1</i>    | NM_175265.4    | apoptotic peptidase activating factor 1 ( <i>Apaf1</i> ), transcript variant 1                                                     | 0.63 |
| <i>Apex1</i>    | NM_177138.2    | apurinic/apyrimidinic endonuclease 1 ( <i>Apex1</i> )                                                                              | 0.66 |
| <i>Apitd1</i>   |                | apoptosis-inducing, TAF9-like domain 1 ( <i>Apitd1</i> )                                                                           | 0.66 |
| <i>Aplp2</i>    |                | amyloid beta (A4) precursor-like protein 2 ( <i>Aplp2</i> ), transcript variant 3                                                  | 0.64 |
| <i>Appbp2</i>   | AK078743       |                                                                                                                                    | 0.57 |
| <i>Aprin</i>    | AK078769       | androgen-induced proliferation inhibitor ( <i>Aprin</i> )                                                                          | 0.62 |
| <i>Aprt</i>     | NM_145609.1    |                                                                                                                                    | 0.58 |
| <i>Arc</i>      | AK082376       | activity regulated cytoskeletal-associated protein ( <i>Arc</i> )                                                                  | 0.58 |

|                      |                |                                                                                                                                                                      |      |
|----------------------|----------------|----------------------------------------------------------------------------------------------------------------------------------------------------------------------|------|
| <i>Ard1</i>          | AK020369       |                                                                                                                                                                      | 0.57 |
| <i>Ard1a</i>         | AK034130       | ARD1 homolog A, N-acetyltransferase ( <i>S. cerevisiae</i> ) ( <i>Ard1a</i> )                                                                                        | 0.42 |
| <i>Areg</i>          | XM_128267      | amphiregulin ( <i>Areg</i> )                                                                                                                                         | 0.27 |
| <i>Arf6</i>          | NM_177462      | ADP-ribosylation factor 6 ( <i>Arf6</i> )                                                                                                                            | 0.53 |
| <i>Arhgap18</i>      | XM_284281.2    | Rho GTPase activating protein 18 ( <i>Arhgap18</i> )                                                                                                                 | 0.27 |
| <i>Arl2bp</i>        | AK034952       | ADP-ribosylation factor-like 2 binding protein ( <i>Arl2bp</i> ), transcript variant 1                                                                               | 0.65 |
| <i>Arl4c</i>         |                | ADP-ribosylation factor-like 4C ( <i>Arl4c</i> )                                                                                                                     | 0.57 |
| <i>Arl6ip1</i>       |                | ADP-ribosylation factor-like 6 interacting protein 1 ( <i>Arl6ip1</i> )                                                                                              | 0.63 |
| <i>Armcx2</i>        | NM_026633.1    | armadillo repeat containing, X-linked 2 ( <i>Armcx2</i> )                                                                                                            | 0.55 |
| <i>Arpc1b</i>        | XM_489200      | actin related protein 2/3 complex, subunit 1B ( <i>Arpc1b</i> )                                                                                                      | 0.30 |
| <i>Arpc2</i>         | AK035833       | actin related protein 2/3 complex, subunit 2 ( <i>Arpc2</i> )                                                                                                        | 0.67 |
| <i>Arpc3</i>         | AK036567       | actin related protein 2/3 complex, subunit 3 ( <i>Arpc3</i> )                                                                                                        | 0.58 |
| <i>Asah1</i>         | AK036626       | N-acylsphingosine amidohydrolase 1 ( <i>Asah1</i> )                                                                                                                  | 0.43 |
| <i>Ascc2</i>         | NM_172581.1    | activating signal cointegrator 1 complex subunit 2 ( <i>Ascc2</i> )                                                                                                  | 0.55 |
| <i>Asns</i>          | NM_177166.2    | asparagine synthetase ( <i>Asns</i> )                                                                                                                                | 0.48 |
| <i>Aspm</i>          | NM_001033375.2 | asp (abnormal spindle)-like, microcephaly associated ( <i>Drosophila</i> ) ( <i>Aspm</i> )                                                                           | 0.37 |
| <i>Atad3a</i>        | XM_489103      | ATPase family, AAA domain containing 3A ( <i>Atad3a</i> )                                                                                                            | 0.60 |
| <i>Atf4</i>          | AK038731       | activating transcription factor 4 ( <i>Atf4</i> )                                                                                                                    | 0.37 |
| <i>Atf7ip</i>        | AK038962       | activating transcription factor 7 interacting protein ( <i>Atf7ip</i> )                                                                                              | 0.55 |
| <i>Atg3</i>          | NM_172447.2    | autophagy-related 3 (yeast) ( <i>Atg3</i> )                                                                                                                          | 0.60 |
| <i>Atic</i>          | NM_175287.3    | 5-aminoimidazole-4-carboxamide ribonucleotide formyltransferase/IMP cyclohydrolase ( <i>Atic</i> )                                                                   | 0.55 |
| <i>Atp13a3</i>       | XM_989657.2    | PREDICTED: ATPase type 13A3, transcript variant 1 ( <i>Atp13a3</i> )                                                                                                 | 0.66 |
| <i>Atp1b3</i>        | NM_021427.1    | ATPase, Na <sup>+</sup> /K <sup>+</sup> transporting, beta 3 polypeptide ( <i>Atp1b3</i> )                                                                           | 0.52 |
| <i>Atp5a1</i>        | NM_177118      | ATP synthase, H <sup>+</sup> transporting, mitochondrial F1 complex, alpha subunit, isoform 1 ( <i>Atp5a1</i> ), nuclear gene encoding mitochondrial protein         | 0.43 |
| <i>Atp5b</i>         |                | ATP synthase, H <sup>+</sup> transporting mitochondrial F1 complex, beta subunit ( <i>Atp5b</i> ), nuclear gene encoding mitochondrial protein                       | 0.59 |
| <i>Atp5c1</i>        | AK044025       | ATP synthase, H <sup>+</sup> transporting, mitochondrial F1 complex, gamma polypeptide 1 ( <i>Atp5c1</i> )                                                           | 0.51 |
| <i>Atp5d</i>         | NM_177225      | ATP synthase, H <sup>+</sup> transporting, mitochondrial F1 complex, delta subunit ( <i>Atp5d</i> )                                                                  | 0.45 |
| <i>Atp5f1</i>        | NM_172768      | ATP synthase, H <sup>+</sup> transporting, mitochondrial F0 complex, subunit b, isoform 1 ( <i>Atp5f1</i> ), nuclear gene encoding mitochondrial protein             | 0.52 |
| <i>Atp5g2</i>        | AK044660       | ATP synthase, H <sup>+</sup> transporting, mitochondrial F0 complex, subunit c (subunit 9), isoform 2 ( <i>Atp5g2</i> )                                              | 0.55 |
| <i>Atp5g3</i>        | NM_133954.1    | ATP synthase, H <sup>+</sup> transporting, mitochondrial F0 complex, subunit c (subunit 9), isoform 3 ( <i>Atp5g3</i> ), nuclear gene encoding mitochondrial protein | 0.66 |
| <i>Atp5h</i>         | NM_153416.1    | ATP synthase, H <sup>+</sup> transporting, mitochondrial F0 complex, subunit d ( <i>Atp5h</i> ), nuclear gene encoding mitochondrial protein                         | 0.55 |
| <i>Atp5j</i>         | NM_030210.1    | ATP synthase, H <sup>+</sup> transporting, mitochondrial F0 complex, subunit F ( <i>Atp5j</i> ), nuclear gene encoding mitochondrial protein                         | 0.54 |
| <i>Atp5l</i>         | NM_178772.2    | ATP synthase, H <sup>+</sup> transporting, mitochondrial F0 complex, subunit g ( <i>Atp5l</i> ), nuclear gene encoding mitochondrial protein                         | 0.44 |
| <i>Atp5o</i>         | NM_175503.3    | ATP synthase, H <sup>+</sup> transporting, mitochondrial F1 complex, O subunit ( <i>Atp5o</i> ), nuclear gene encoding mitochondrial protein                         | 0.55 |
| <i>Atp6v0a1</i>      | NM_146217.3    |                                                                                                                                                                      | 0.62 |
| <i>Atp6v1c1</i>      | NM_144829.1    | ATPase, H <sup>+</sup> transporting, lysosomal V1 subunit C1 ( <i>Atp6v1c1</i> )                                                                                     | 0.62 |
| <i>Atp6v1d</i>       | NM_007377.3    | ATPase, H <sup>+</sup> transporting, lysosomal V1 subunit D ( <i>Atp6v1d</i> )                                                                                       | 0.63 |
| <i>Atp6v1e1</i>      | NM_172961.2    | ATPase, H <sup>+</sup> transporting, lysosomal V1 subunit E1 ( <i>Atp6v1e1</i> )                                                                                     | 0.60 |
| <i>Atp6v1h</i>       | NM_023732.2    | ATPase, H <sup>+</sup> transporting, lysosomal V1 subunit H ( <i>Atp6v1h</i> )                                                                                       | 0.58 |
| <i>Atpif1</i>        | XM_907304.2    | ATPase inhibitory factor 1 ( <i>Atpif1</i> ), nuclear gene encoding mitochondrial protein                                                                            | 0.62 |
| <i>Atxn10</i>        | NM_172912.4    | ataxin 10 ( <i>Atxn10</i> )                                                                                                                                          | 0.49 |
| <i>AU040320</i>      | NM_001033336.2 | expressed sequence AU040320 ( <i>AU040320</i> ), transcript variant 3                                                                                                | 0.54 |
| <i>Aup1</i>          | NM_176839.1    | ancient ubiquitous protein 1 ( <i>Aup1</i> )                                                                                                                         | 0.66 |
| <i>Aurka</i>         | NM_013854.1    | aurora kinase A ( <i>Aurka</i> )                                                                                                                                     | 0.19 |
| <i>Aurkaip1</i>      | NM_013853.1    | aurora kinase A interacting protein 1 ( <i>Aurkaip1</i> )                                                                                                            | 0.61 |
| <i>Aurkb</i>         | NR_003522.1    | aurora kinase B ( <i>Aurkb</i> )                                                                                                                                     | 0.25 |
| <i>AV028368</i>      | NM_029631.2    |                                                                                                                                                                      | 0.65 |
| <i>AW120700</i>      | NM_134130.1    |                                                                                                                                                                      | 0.55 |
| <i>B020018G12Rik</i> | NM_198127.1    | RIKEN cDNA B020018G12 gene ( <i>B020018G12Rik</i> )                                                                                                                  | 0.61 |
| <i>B230114H05Rik</i> | NM_177678.6    |                                                                                                                                                                      | 0.58 |
| <i>B230208H17Rik</i> | NM_177470      | RIKEN cDNA B230208H17 gene ( <i>B230208H17Rik</i> )                                                                                                                  | 0.65 |
| <i>B230343A10Rik</i> | NM_007382.1    |                                                                                                                                                                      | 0.56 |
| <i>B2m</i>           | NM_207223.1    | beta-2 microglobulin ( <i>B2m</i> )                                                                                                                                  | 0.62 |
| <i>B3galt6</i>       | NM_009338.3    | UDP-Gal:betaGal beta 1,3-galactosyltransferase, polypeptide 6 ( <i>B3galt6</i> )                                                                                     | 0.51 |
| <i>B3gnt5</i>        | NM_133225.2    | UDP-GlcNAc:betaGal beta-1,3-N-acetylglucosaminyltransferase 5 ( <i>B3gnt5</i> )                                                                                      | 0.66 |
| <i>B4galt3</i>       | NM_134037.2    | UDP-Gal:betaGlcNAc beta 1,4-galactosyltransferase, polypeptide 3 ( <i>B4galt3</i> )                                                                                  | 0.50 |
| <i>Bag1</i>          | XM_355744.1    | Bcl2-associated athanogene 1 ( <i>Bag1</i> )                                                                                                                         | 0.62 |

|                      |                |                                                                                                                 |      |
|----------------------|----------------|-----------------------------------------------------------------------------------------------------------------|------|
| <i>Bahcc1</i>        | NM_080633.2    | BAH domain and coiled-coil containing 1 (Bahcc1)                                                                | 0.42 |
| <i>Bai2</i>          | NM_012006.2    | brain-specific angiogenesis inhibitor 2 (Bai2)                                                                  | 0.63 |
| <i>Banf1</i>         | NM_025590.3    | barrier to autointegration factor 1 (Banf1), transcript variant 2                                               | 0.28 |
| <i>Bat1a</i>         | NM_133348.1    | HLA-B-associated transcript 1A (Bat1a)                                                                          | 0.66 |
| <i>Bax</i>           | NM_153420.2    | Bcl2-associated X protein (Bax)                                                                                 | 0.64 |
| <i>BC003236</i>      | NM_053178.2    |                                                                                                                 | 0.47 |
| <i>BC003885</i>      | NM_027976.2    | cDNA sequence BC003885 (BC003885)                                                                               | 0.59 |
| <i>BC003965</i>      | NM_080575.1    |                                                                                                                 | 0.52 |
| <i>BC017647</i>      | NM_019811.3    | cDNA sequence BC017647 (BC017647)                                                                               | 0.45 |
| <i>BC019806</i>      | NM_007392.2    |                                                                                                                 | 0.65 |
| <i>BC024659</i>      | NM_007393.3    | PREDICTED: cDNA sequence BC024659 (BC024659)                                                                    | 0.61 |
| <i>BC031781</i>      | NM_019673.1    | cDNA sequence BC031781 (BC031781)                                                                               | 0.66 |
| <i>BC039210</i>      | NM_134156.1    | PREDICTED: cDNA sequence BC039210 (BC039210)                                                                    | 0.57 |
| <i>BC046331</i>      | NM_019785.1    | cDNA sequence BC046331 (BC046331)                                                                               | 0.60 |
| <i>BC046404</i>      | NM_023735.1    | cDNA sequence BC046404 (BC046404)                                                                               | 0.62 |
| <i>BC051227</i>      | NM_007400.2    | cDNA sequence BC051227 (BC051227)                                                                               | 0.65 |
| <i>BC056474</i>      | NM_009614.2    | cDNA sequence BC056474 (BC056474)                                                                               | 0.62 |
| <i>BC060632</i>      | NM_009615.5    | cDNA sequence BC060632 (BC060632)                                                                               | 0.62 |
| <i>BC067047</i>      | NM_172053.2    | cDNA sequence BC067047 (BC067047)                                                                               | 0.47 |
| <i>BC085271</i>      | NM_175506.3    | cDNA sequence BC085271 (BC085271)                                                                               | 0.45 |
| <i>Bcas1</i>         | NM_172845.1    | breast carcinoma amplified sequence 1 (Bcas1)                                                                   | 0.42 |
| <i>Bccip</i>         |                | BRCA2 and CDKN1A interacting protein (Bccip)                                                                    | 0.57 |
| <i>Bcl7c</i>         | XM_131451.2    | B-cell CLL/lymphoma 7C (Bcl7c)                                                                                  | 0.54 |
| <i>Bcs1l</i>         | NM_172723.4    | BCS1-like (yeast) (Bcs1l)                                                                                       | 0.66 |
| <i>Bdnf</i>          | NM_133770.1    | brain derived neurotrophic factor (Bdnf), transcript variant 3                                                  | 0.66 |
| <i>Bex2</i>          | NM_153534.2    | brain expressed X-linked 2 (Bex2)                                                                               | 0.60 |
| <i>Bhlhb2</i>        | NM_009623.2    | basic helix-loop-helix domain containing, class B2 (Bhlhb2)                                                     | 0.57 |
| <i>Bicd2</i>         | NM_009627.1    |                                                                                                                 | 0.62 |
| <i>Bin1</i>          | NM_001008533.2 | bridging integrator 1 (Bin1)                                                                                    | 0.57 |
| <i>Birc5</i>         | NM_028121.1    | baculoviral IAP repeat-containing 5 (Birc5), transcript variant 1                                               | 0.30 |
| <i>Blm</i>           | NM_007414.3    | Bloom syndrome homolog (human) (Blm), transcript variant 1                                                      | 0.42 |
| <i>Bloc1s2</i>       | NM_007417.2    |                                                                                                                 | 0.65 |
| <i>Blvra</i>         | NM_007420.2    |                                                                                                                 | 0.62 |
| <i>Bmp7</i>          | NM_130863.1    | bone morphogenetic protein 7 (Bmp7)                                                                             | 0.64 |
| <i>Bnip2</i>         | NM_019822.3    | BCL2/adenovirus E1B interacting protein 2 (Bnip2), transcript variant alpha                                     | 0.55 |
| <i>Bok</i>           | NM_009634      |                                                                                                                 | 0.31 |
| <i>Bola2</i>         | NM_010347      | bolA-like 2 (E. coli) (Bola2)                                                                                   | 0.50 |
| <i>Bola3</i>         | NM_054070.2    | bolA-like 3 (E. coli) (Bola3)                                                                                   | 0.51 |
| <i>Bop1</i>          | NM_001037136.1 | block of proliferation 1 (Bop1)                                                                                 | 0.56 |
| <i>Bpnt1</i>         | NM_010472.2    | bisphosphate 3'-nucleotidase 1 (Bpnt1)                                                                          | 0.50 |
| <i>Brd2</i>          | NM_178162.2    | bromodomain containing 2 (Brd2), transcript variant 1                                                           | 0.65 |
| <i>Brip1</i>         | NM_018743.3    | BRCA1 interacting protein C-terminal helicase 1 (Brip1)                                                         | 0.63 |
| <i>Brn1</i>          | NM_007428.3    |                                                                                                                 | 0.22 |
| <i>Btaf1</i>         | NM_009642.4    | BTAF1 RNA polymerase II, B-TFIID transcription factor-associated, (Mot1 homolog, <i>S. cerevisiae</i> ) (Btaf1) | 0.61 |
| <i>Btbd11</i>        | NM_026375.1    | BTB (POZ) domain containing 11 (Btbd11), transcript variant 2                                                   | 0.40 |
| <i>Btf3</i>          | NM_016661      |                                                                                                                 | 0.57 |
| <i>Btg1</i>          | NM_145542.3    | B-cell translocation gene 1, anti-proliferative (Btg1)                                                          | 0.57 |
| <i>Bub1b</i>         | NM_009643.1    |                                                                                                                 | 0.17 |
| <i>Bub3</i>          | NM_001002895.2 | budding uninhibited by benzimidazoles 3 homolog ( <i>S. cerevisiae</i> ) (Bub3)                                 | 0.66 |
| <i>Bves</i>          | XM_136041.3    |                                                                                                                 | 0.59 |
| <i>Bxdc1</i>         | XM_148986.1    |                                                                                                                 | 0.58 |
| <i>Bxdc2</i>         | NM_177907.2    | brix domain containing 2 (Bxdc2)                                                                                | 0.56 |
| <i>Bxdc5</i>         | NM_198860.1    | brix domain containing 5 (Bxdc5), transcript variant 2                                                          | 0.60 |
| <i>Bzw1</i>          | NM_178926.2    |                                                                                                                 | 0.49 |
| <i>Bzw2</i>          | NM_182807.2    | basic leucine zipper and W2 domains 2 (Bzw2)                                                                    | 0.42 |
| <i>C030003D03Rik</i> |                | RIKEN cDNA C030003D03 gene (C030003D03Rik)                                                                      | 0.43 |
| <i>C030025P15Rik</i> | NM_016666.2    |                                                                                                                 | 0.64 |
| <i>C130007D14</i>    | NM_016895.3    |                                                                                                                 | 0.66 |
| <i>C130032J12Rik</i> | NM_009647.4    | RIKEN cDNA C130032J12 gene (C130032J12Rik)                                                                      | 0.55 |
| <i>C1galt1c1</i>     | NM_031185.2    | C1GALT1-specific chaperone 1 (C1galt1c1)                                                                        | 0.60 |
| <i>C230040D10Rik</i> | NM_001033785.1 | PREDICTED: RIKEN cDNA C230040D10 gene (C230040D10Rik)                                                           | 0.66 |
| <i>C230053B09Rik</i> | NM_018747.3    |                                                                                                                 | 0.62 |
| <i>C230071H18Rik</i> | NM_017476.2    | RIKEN cDNA C230071H18 gene (C230071H18Rik)                                                                      | 0.61 |
| <i>C230078M08Rik</i> | NM_023423.3    | RIKEN cDNA C230078M08 gene (C230078M08Rik)                                                                      | 0.64 |
| <i>C330006P03Rik</i> | NM_021473.2    |                                                                                                                 | 0.48 |
| <i>C330023M02Rik</i> | NM_013916.1    | RIKEN cDNA C330023M02 gene (C330023M02Rik)                                                                      | 0.51 |
| <i>C530008M17Rik</i> | NM_008525.3    | PREDICTED: RIKEN cDNA C530008M17 gene, transcript variant 3 (C530008M17Rik)                                     | 0.46 |
| <i>C730029F17Rik</i> | NM_020559.1    |                                                                                                                 | 0.58 |
| <i>C78339</i>        | NM_019698.1    |                                                                                                                 | 0.50 |
| <i>C79267</i>        | NM_007437      |                                                                                                                 | 0.49 |

|                      |                |                                                                                            |      |
|----------------------|----------------|--------------------------------------------------------------------------------------------|------|
| <i>C79407</i>        | NM_172532      | expressed sequence C79407 (C79407)                                                         | 0.45 |
| <i>C920004C08Rik</i> | NM_134042.2    |                                                                                            | 0.21 |
| <i>Cacna1h</i>       | NM_007438.3    | calcium channel, voltage-dependent, T type, alpha 1H subunit (Cacna1h)                     | 0.54 |
| <i>Cad</i>           | NM_009657.3    | carbamoyl-phosphate synthetase 2, aspartate transcarbamylase, and dihydroorotase (Cad)     | 0.66 |
| <i>Calm2</i>         | NM_199035.1    | calmodulin 2 (Calm2)                                                                       | 0.22 |
| <i>Calr</i>          | NM_133981.1    | calreticulin (Calr)                                                                        | 0.50 |
| <i>Calu</i>          | NM_001081395.1 | calumenin (Calu), transcript variant 1                                                     | 0.59 |
| <i>Camk1</i>         | NM_009667.2    | calcium/calmodulin-dependent protein kinase I (Camk1)                                      | 0.54 |
| <i>Camk2b</i>        | NM_175007.1    | calcium/calmodulin-dependent protein kinase II, beta (Camk2b)                              | 0.32 |
| <i>Camk2n2</i>       | NM_007446.1    | PREDICTED: calcium/calmodulin-dependent protein kinase II inhibitor 2 (Camk2)              | 0.53 |
| <i>Camkk2</i>        | NM_001042711.2 | calcium/calmodulin-dependent protein kinase kinase 2, beta (Camkk2)                        | 0.53 |
| <i>Camta1</i>        | NM_021505.2    | calmodulin binding transcription activator 1 (Camta1), transcript variant 1                | 0.59 |
| <i>Cand1</i>         | NM_009640.3    | PREDICTED: cullin associated and neddylation disassociated 1, transcript variant 1 (Cand1) | 0.64 |
| <i>Caprin1</i>       | NM_007426.3    | cell cycle associated protein 1 (Caprin1)                                                  | 0.59 |
| <i>Car2</i>          | NM_020581.1    | carbonic anhydrase 2 (Car2)                                                                | 0.43 |
| <i>Cask</i>          | NM_020332.3    | calcium/calmodulin-dependent serine protein kinase (MAGUK family) (Cask)                   | 0.37 |
| <i>Cbfb</i>          | NM_170687.3    | core binding factor beta (Cbfb)                                                            | 0.29 |
| <i>Cbr3</i>          | NM_028390.2    | carbonyl reductase 3 (Cbr3)                                                                | 0.58 |
| <i>Cbx3</i>          | NM_023210.3    |                                                                                            | 0.51 |
| <i>Cbx5</i>          | NM_013469.1    | chromobox homolog 5 (Drosophila HP1a) (Cbx5), transcript variant 2                         | 0.58 |
| <i>Ccdc101</i>       | NM_013470.1    | coiled-coil domain containing 101 (Ccdc101)                                                | 0.65 |
| <i>Ccdc124</i>       | NM_009673.1    | coiled-coil domain containing 124 (Ccdc124)                                                | 0.60 |
| <i>Ccdc43</i>        | NM_001035854.2 | coiled-coil domain containing 43 (Ccdc43)                                                  | 0.64 |
| <i>Ccdc58</i>        | NM_029505.1    | coiled-coil domain containing 58 (Ccdc58)                                                  | 0.61 |
| <i>Ccdc86</i>        | NM_021710.1    | coiled-coil domain containing 86 (Ccdc86)                                                  | 0.63 |
| <i>Ccdc99</i>        | NM_001042558.1 | coiled-coil domain containing 99 (Ccdc99)                                                  | 0.57 |
| <i>Ccnb1</i>         | NM_009687.1    | cyclin B1 (Ccnb1)                                                                          | 0.13 |
| <i>Ccnd1</i>         | NM_027263.1    |                                                                                            | 0.06 |
| <i>Ccnd2</i>         | NM_009691.2    |                                                                                            | 0.23 |
| <i>Ccne2</i>         | NM_009696.2    | cyclin E2 (Ccne2), transcript variant 1                                                    | 0.67 |
| <i>Ccng1</i>         | NM_025825      | cyclin G1 (Ccng1)                                                                          | 0.64 |
| <i>Ccnh</i>          | NM_175310.5    | cyclin H (Ccnh)                                                                            | 0.61 |
| <i>Ccny11</i>        | NM_009698.1    | cyclin Y-like 1 (Ccny11)                                                                   | 0.41 |
| <i>Cct3</i>          | NM_009700.1    | chaperonin containing Tcp1, subunit 3 (gamma) (Cct3)                                       | 0.48 |
| <i>Cct4</i>          | NM_022026.2    | chaperonin containing Tcp1, subunit 4 (delta) (Cct4)                                       | 0.52 |
| <i>Cct6a</i>         | NM_018790.2    | chaperonin containing Tcp1, subunit 6a (zeta) (Cct6a)                                      | 0.48 |
| <i>Cct8</i>          | NM_019870.1    | chaperonin containing Tcp1, subunit 8 (theta) (Cct8)                                       | 0.45 |
| <i>Cd164</i>         | NM_019870.2    | CD164 antigen (Cd164)                                                                      | 0.62 |
| <i>Cd276</i>         | NM_009704.3    | CD276 antigen (Cd276)                                                                      | 0.39 |
| <i>Cd8b</i>          | NM_007477.4    |                                                                                            | 0.64 |
| <i>Cdc20</i>         | NM_007481.3    | cell division cycle 20 homolog (S. cerevisiae) (Cdc20)                                     | 0.19 |
| <i>Cdc25a</i>        | NM_176837.2    | cell division cycle 25 homolog A (S. pombe) (Cdc25a)                                       | 0.62 |
| <i>Cdc25c</i>        | NM_183019.2    | cell division cycle 25 homolog C (S. pombe) (Cdc25c)                                       | 0.63 |
| <i>Cdc2a</i>         | NM_024191.1    | cell division cycle 2 homolog A (S. pombe) (Cdc2a)                                         | 0.16 |
| <i>Cdc42</i>         | NM_177305.3    | cell division cycle 42 homolog (S. cerevisiae) (Cdc42)                                     | 0.60 |
| <i>Cdc42ep1</i>      | NM_019419.1    | CDC42 effector protein (Rho GTPase binding) 1 (Cdc42ep1)                                   | 0.65 |
| <i>Cdc42se1</i>      | NM_001081083.1 | CDC42 small effector 1 (Cdc42se1), transcript variant 1                                    | 0.57 |
| <i>Cdc45l</i>        | NM_030184.2    | cell division cycle 45 homolog (S. cerevisiae)-like (Cdc45l)                               | 0.48 |
| <i>Cdc5l</i>         | NM_026139.3    | cell division cycle 5-like (S. pombe) (Cdc5l)                                              | 0.60 |
| <i>Cdc6</i>          | NM_023142.1    | cell division cycle 6 homolog (S. cerevisiae) (Cdc6), transcript variant 1                 | 0.58 |
| <i>Cdc7</i>          | NM_029711.1    | cell division cycle 7 (S. cerevisiae) (Cdc7)                                               | 0.31 |
| <i>Cdca2</i>         | NM_019824.3    | cell division cycle associated 2 (Cdca2)                                                   | 0.25 |
| <i>Cdca3</i>         | NM_178917.2    | cell division cycle associated 3 (Cdca3)                                                   | 0.11 |
| <i>Cdca4</i>         | NM_009712.3    | cell division cycle associated 4 (Cdca4)                                                   | 0.44 |
| <i>Cdca5</i>         | NM_028710.2    | cell division cycle associated 5 (Cdca5)                                                   | 0.58 |
| <i>Cdca7</i>         | NM_019734.1    | cell division cycle associated 7 (Cdca7)                                                   | 0.21 |
| <i>Cdca8</i>         | NM_029291.1    | cell division cycle associated 8 (Cdca8)                                                   | 0.13 |
| <i>Cdh13</i>         | NM_012055.1    | cadherin 13 (Cdh13)                                                                        | 0.35 |
| <i>Cdk2</i>          | NM_028386.1    | cyclin-dependent kinase 2 (Cdk2), transcript variant 1                                     | 0.41 |
| <i>Cdk4</i>          | NM_009791.4    | cyclin-dependent kinase 4 (Cdk4)                                                           | 0.47 |
| <i>Cdk8</i>          | NM_007494.3    | cyclin-dependent kinase 8 (Cdk8)                                                           | 0.62 |
| <i>Cdkn1a</i>        | NM_179203.1    | cyclin-dependent kinase inhibitor 1A (P21) (Cdkn1a)                                        | 0.49 |
| <i>Cdkn2aipnl</i>    | NM_007498.2    | CDKN2A interacting protein N-terminal like (Cdkn2aipnl)                                    | 0.55 |
| <i>Cdkn3</i>         | NM_009716.2    | PREDICTED: cyclin-dependent kinase inhibitor 3, transcript variant 5 (Cdkn3)               | 0.24 |
| <i>Cdon</i>          | NM_019426.2    |                                                                                            | 0.62 |
| <i>Cdr2</i>          | NM_026217.1    | cerebellar degeneration-related 2 (Cdr2)                                                   | 0.40 |
| <i>Cdr2l</i>         | NM_026402.3    | cerebellar degeneration-related protein 2-like (Cdr2l)                                     | 0.44 |
| <i>Cdt1</i>          | NM_026195.1    | chromatin licensing and DNA replication factor 1 (Cdt1)                                    | 0.28 |
| <i>Cebpd</i>         | XM_001480958.1 | CCAAT/enhancer binding protein (C/EBP), delta (Cebpd)                                      | 0.66 |

|                |                |                                                                                                                                                |      |
|----------------|----------------|------------------------------------------------------------------------------------------------------------------------------------------------|------|
| <i>Cenpa</i>   | NM_144900.1    | centromere protein A (Cenpa)                                                                                                                   | 0.06 |
| <i>Cenpb</i>   | NM_009721.4    | centromere protein B (Cenpb)                                                                                                                   | 0.62 |
| <i>Cenpf</i>   | NM_013415.5    | PREDICTED: centromere autoantigen F, transcript variant 3 (Cenpf)                                                                              | 0.23 |
| <i>Cenpi</i>   | NM_007502.3    | centromere protein I (Cenpi)                                                                                                                   | 0.62 |
| <i>Cenpk</i>   | NM_007505.2    | centromere protein K (Cenpk), transcript variant 1                                                                                             | 0.45 |
| <i>Cenpl</i>   | NM_016774.3    | centromere protein L (Cenpl)                                                                                                                   | 0.41 |
| <i>Cenpm</i>   | NM_020615.3    | centromere protein M (Cenpm), transcript variant 2                                                                                             | 0.57 |
| <i>Cenpn</i>   | NM_025313.1    | centromere protein N (Cenpn)                                                                                                                   | 0.55 |
| <i>Cenpp</i>   | NM_009725.3    | centromere protein P (Cenpp)                                                                                                                   | 0.58 |
| <i>Cenpq</i>   | NM_026468.1    | centromere protein Q (Cenpq)                                                                                                                   | 0.57 |
| <i>Centd1</i>  | NM_175015.2    | PREDICTED: centaurin, delta 1, transcript variant 5 (Centd1)                                                                                   | 0.56 |
| <i>Cep152</i>  | NM_027862.1    | centrosomal protein 152 (Cep152)                                                                                                               | 0.63 |
| <i>Cep170</i>  | NM_016755.2    | centrosomal protein 170 (Cep170)                                                                                                               | 0.61 |
| <i>Cep55</i>   | NM_013795.4    | centrosomal protein 55 (Cep55)                                                                                                                 | 0.60 |
| <i>Cep78</i>   | NM_138597.2    | centrosomal protein 78 (Cep78)                                                                                                                 | 0.59 |
| <i>Cetn3</i>   | NM_016920.1    | centrin 3 (Cetn3)                                                                                                                              | 0.63 |
| <i>Cfl1</i>    | NM_025494.2    | cofilin 1, non-muscle (Cfl1)                                                                                                                   | 0.64 |
| <i>Cggbp1</i>  | NM_023721.2    | CGG triplet repeat binding protein 1 (Cggbp1)                                                                                                  | 0.63 |
| <i>Chaf1a</i>  | NM_007510.2    | chromatin assembly factor 1, subunit A (p150) (Chaf1a)                                                                                         | 0.60 |
| <i>Chaf1b</i>  | NM_133826.2    | chromatin assembly factor 1, subunit B (p60) (Chaf1b)                                                                                          | 0.31 |
| <i>Chchd1</i>  | NM_009727.2    | coiled-coil-helix-coiled-coil-helix domain containing 1 (Chchd1)                                                                               | 0.47 |
| <i>Chchd4</i>  | NM_007512.2    | coiled-coil-helix-coiled-coil-helix domain containing 4 (Chchd4), nuclear gene encoding mitochondrial protein                                  | 0.61 |
| <i>Chd1</i>    | NM_009124.4    |                                                                                                                                                | 0.60 |
| <i>Chmp4b</i>  | NM_016843.3    | chromatin modifying protein 4B (Chmp4b)                                                                                                        | 0.57 |
| <i>Chmp7</i>   | NM_177629.2    | CHMP family, member 7 (Chmp7)                                                                                                                  | 0.64 |
| <i>Chn2</i>    | NM_133886.2    | chimerin (chimaerin) 2 (Chn2)                                                                                                                  | 0.27 |
| <i>Chrm3</i>   | NM_007517.3    | cholinergic receptor, muscarinic 3, cardiac (Chrm3)                                                                                            | 0.56 |
| <i>Chst11</i>  | NM_011497.3    | carbohydrate sulfotransferase 11 (Chst11)                                                                                                      | 0.66 |
| <i>Chst2</i>   | NM_025338.3    | carbohydrate sulfotransferase 2 (Chst2)                                                                                                        | 0.49 |
| <i>Chst7</i>   | NM_011496.1    | carbohydrate (N-acetylglucosamino) sulfotransferase 7 (Chst7)                                                                                  | 0.15 |
| <i>Chtf18</i>  | NM_177672      | CTF18, chromosome transmission fidelity factor 18 homolog (S. cerevisiae) (Chtf18)                                                             | 0.55 |
| <i>Cirh1a</i>  |                | cirrhosis, autosomal recessive 1A (human) (Cirh1a)                                                                                             | 0.59 |
| <i>Ckap2</i>   | XM_127132.3    |                                                                                                                                                | 0.32 |
| <i>Ckap2l</i>  | NM_009465.3    | cytoskeleton associated protein 2-like (Ckap2l)                                                                                                | 0.57 |
| <i>Cldnd1</i>  | NM_001039518.1 | claudin domain containing 1 (Cldnd1)                                                                                                           | 0.52 |
| <i>Clic1</i>   |                |                                                                                                                                                | 0.54 |
| <i>Clic4</i>   | AK045406       | chloride intracellular channel 4 (mitochondrial) (Clic4), nuclear gene encoding mitochondrial protein                                          | 0.43 |
| <i>Cln5</i>    | NM_001024616.1 |                                                                                                                                                | 0.47 |
| <i>Clns1a</i>  | XM_981366.1    | chloride channel, nucleotide-sensitive, 1A (Clns1a)                                                                                            | 0.60 |
| <i>Clpp</i>    | XM_001001884.2 | caseinolytic peptidase, ATP-dependent, proteolytic subunit homolog (E. coli) (Clpp)                                                            | 0.61 |
| <i>Clspn</i>   | NM_133898.3    | claspin homolog (Xenopus laevis) (Clspn)                                                                                                       | 0.28 |
| <i>Clta</i>    | AK046118       | clathrin, light polypeptide (Lca) (Clta), transcript variant 2                                                                                 | 0.63 |
| <i>Cltc</i>    |                |                                                                                                                                                | 0.56 |
| <i>Cmas</i>    | NM_009735.2    | cytidine monophospho-N-acetylneuraminic acid synthetase (Cmas)                                                                                 | 0.61 |
| <i>Cmc1</i>    | NM_033149.2    | COX assembly mitochondrial protein homolog (S. cerevisiae) (Cmc1), nuclear gene encoding mitochondrial protein                                 | 0.56 |
| <i>Cmpk</i>    | NM_080445.4    | cytidylate kinase (Cmpk)                                                                                                                       | 0.63 |
| <i>Cnih</i>    | NM_029792.1    | cornichon homolog (Drosophila) (Cnih)                                                                                                          | 0.60 |
| <i>Cnih4</i>   | NM_054052.2    | cornichon homolog 4 (Drosophila) (Cnih4)                                                                                                       | 0.43 |
| <i>Cntnap4</i> | NM_020579.1    |                                                                                                                                                | 0.42 |
| <i>Col16a1</i> | AK046967       | collagen, type XVI, alpha 1 (Col16a1)                                                                                                          | 0.30 |
| <i>Col18a1</i> | AK047284       | procollagen, type XVIII, alpha 1 (Col18a1)                                                                                                     | 0.11 |
| <i>Comm1d1</i> | NM_013717.2    | COMM domain containing 1 (Comm1d1)                                                                                                             | 0.59 |
| <i>Cops6</i>   | NM_019517.2    | COP9 (constitutive photomorphogenic) homolog, subunit 6 (Arabidopsis thaliana) (Cops6)                                                         | 0.61 |
| <i>Cops7a</i>  | NM_009736.1    | COP9 (constitutive photomorphogenic) homolog, subunit 7a (Arabidopsis thaliana) (Cops7a)                                                       | 0.61 |
| <i>Coq7</i>    | NM_198423.2    | demethyl-Q 7 (Coq7)                                                                                                                            | 0.64 |
| <i>Coro1c</i>  | NM_173071.1    | coronin, actin binding protein 1C (Coro1c)                                                                                                     | 0.40 |
| <i>Cox10</i>   | NM_001038231.1 | COX10 homolog, cytochrome c oxidase assembly protein, heme A: farnesyltransferase (yeast) (Cox10), nuclear gene encoding mitochondrial protein | 0.63 |
| <i>Cox17</i>   | NM_019693.2    | cytochrome c oxidase, subunit XVII assembly protein homolog (yeast) (Cox17)                                                                    | 0.48 |
| <i>Cox18</i>   | NM_007527.2    | COX18 cytochrome c oxidase assembly homolog (S. cerevisiae) (Cox18)                                                                            | 0.60 |
| <i>Cox5a</i>   | NM_172742      | cytochrome c oxidase, subunit Va (Cox5a), nuclear gene encoding mitochondrial protein                                                          | 0.42 |



|                      |                |                                                                                |      |
|----------------------|----------------|--------------------------------------------------------------------------------|------|
| <i>Cox5b</i>         | NM_133234.1    |                                                                                | 0.64 |
| <i>Cox6a1</i>        | NM_130452.1    |                                                                                | 0.57 |
| <i>Cox6b1</i>        | NM_026116.2    | cytochrome c oxidase, subunit VIb polypeptide 1 (Cox6b1)                       | 0.56 |
| <i>Cox6c</i>         | NM_175325.2    | cytochrome c oxidase, subunit VIc (Cox6c)                                      | 0.62 |
| <i>Cox7a2</i>        | NM_030249      | cytochrome c oxidase, subunit VIIa 2 (Cox7a2)                                  | 0.46 |
| <i>Cox7a2l</i>       | NM_198609.2    | cytochrome c oxidase subunit VIIa polypeptide 2-like (Cox7a2l)                 | 0.66 |
| <i>Cplx1</i>         | XM_128528.2    | complexin 1 (Cplx1)                                                            | 0.61 |
| <i>Cpne8</i>         | NM_145430.1    | copine VIII (Cpne8), transcript variant 2                                      | 0.50 |
| <i>Creld2</i>        | NM_145460      | cysteine-rich with EGF-like domains 2 (Creld2)                                 | 0.57 |
| <i>Crif3</i>         | NM_145450.3    | cytokine receptor-like factor 3 (Crif3)                                        | 0.66 |
| <i>Crtap</i>         | NM_146237.1    | cartilage associated protein (Crtap)                                           | 0.52 |
| <i>Cs</i>            | XM_001472442.1 | citrate synthase (Cs), nuclear gene encoding mitochondrial protein             | 0.38 |
| <i>Csad</i>          | NM_173421.1    |                                                                                | 0.67 |
| <i>Csda</i>          | NM_153584.1    | cold shock domain protein A (Csda)                                             | 0.52 |
| <i>Csde1</i>         | NM_145943.1    | cold shock domain containing E1, RNA binding (Csde1)                           | 0.62 |
| <i>Cse1l</i>         | XM_196478      | chromosome segregation 1-like ( <i>S. cerevisiae</i> ) (Cse1l)                 | 0.53 |
| <i>Csk</i>           | XM_001481316.1 | c-src tyrosine kinase (Csk)                                                    | 0.66 |
| <i>Csnk1d</i>        | NM_177673.2    | casein kinase 1, delta (Csnk1d), transcript variant 2                          | 0.61 |
| <i>Csnk1e</i>        | NM_198861.1    | casein kinase 1, epsilon (Csnk1e)                                              | 0.64 |
| <i>Csnk1g2</i>       | NM_178418.2    | casein kinase 1, gamma 2 (Csnk1g2)                                             | 0.66 |
| <i>Csnk2a1-rs3</i>   | NM_183170.2    |                                                                                | 0.56 |
| <i>Csnk2a2</i>       | NM_001001493.2 | casein kinase 2, alpha prime polypeptide (Csnk2a2)                             | 0.58 |
| <i>Cspg5</i>         | NM_198625.1    | chondroitin sulfate proteoglycan 5 (Cspg5)                                     | 0.49 |
| <i>Csrp2</i>         | NM_177782.3    | cysteine and glycine-rich protein 2 (Csrp2)                                    | 0.48 |
| <i>Cstf1</i>         | NM_001008551.1 | cleavage stimulation factor, 3' pre-RNA, subunit 1 (Cstf1)                     | 0.64 |
| <i>Ctgf</i>          | NM_013867.1    |                                                                                | 0.49 |
| <i>Ctps</i>          | NM_029815.1    | cytidine 5'-triphosphate synthase (Ctps)                                       | 0.60 |
| <i>Ctsc</i>          | NM_138681.3    | cathepsin C (Ctsc)                                                             | 0.39 |
| <i>Ctsh</i>          | NM_025392.1    | cathepsin H (Ctsh)                                                             | 0.59 |
| <i>Ctnbp2nl</i>      | NM_207680.2    | CTTNBP2 N-terminal like (Ctnbp2nl)                                             | 0.41 |
| <i>Cugbp1</i>        | NM_009746.2    | CUG triplet repeat, RNA binding protein 1 (Cugbp1), transcript variant 2       | 0.60 |
| <i>Cugbp2</i>        | NM_025784.2    | CUG triplet repeat, RNA binding protein 2 (Cugbp2), transcript variant 6       | 0.47 |
| <i>Cul3</i>          | NM_027208.1    | cullin 3 (Cul3)                                                                | 0.58 |
| <i>Cx3cl1</i>        | NM_001048141.1 | chemokine (C-X3-C motif) ligand 1 (Cx3cl1)                                     | 0.42 |
| <i>Cxadr</i>         | NM_009749.1    | coxsaekie virus and adenovirus receptor (Cxadr), transcript variant 1          | 0.33 |
| <i>Cxcl1</i>         | NM_011498.4    | chemokine (C-X-C motif) ligand 1 (Cxcl1)                                       | 0.46 |
| <i>Cxcl4</i>         | NM_031397.2    | chemokine (C-X-C motif) ligand 4 (Cxcl4)                                       | 0.47 |
| <i>Cyc1</i>          | NM_029791      | cytochrome c-1 (Cyc1)                                                          | 0.37 |
| <i>Cycs</i>          | NM_009668.1    | cytochrome c, somatic (Cycs), nuclear gene encoding mitochondrial protein      | 0.27 |
| <i>Cyp51</i>         |                | cytochrome P450, family 51 (Cyp51)                                             | 0.23 |
| <i>D030038A19Rik</i> | NM_009689.2    |                                                                                | 0.65 |
| <i>D030056L22Rik</i> | NM_007550.3    | RIKEN cDNA D030056L22 gene (D030056L22Rik)                                     | 0.58 |
| <i>D10627</i>        | XM_193940.2    | cDNA sequence D10627 (D10627)                                                  | 0.64 |
| <i>D10ErtD322e</i>   | NM_026678.3    | DNA segment, Chr 10, ERATO Doi 322, expressed (D10ErtD322e)                    | 0.49 |
| <i>D10Wsu102e</i>    | NM_007557.2    | DNA segment, Chr 10, Wayne State University 102, expressed (D10Wsu102e)        | 0.60 |
| <i>D10Wsu52e</i>     | NM_007560.3    | DNA segment, Chr 10, Wayne State University 52, expressed (D10Wsu52e)          | 0.58 |
| <i>D12ErtD553e</i>   | NM_001008238.2 | DNA segment, Chr 12, ERATO Doi 553, expressed (D12ErtD553e)                    | 0.61 |
| <i>D12Wsu95e</i>     | NM_016778      |                                                                                | 0.46 |
| <i>D130004H04Rik</i> | NM_175103.2    |                                                                                | 0.62 |
| <i>D15Mgi27</i>      | NM_175277.2    | DNA Segment, Chr 15, Mouse Genome Informatics 27 (D15Mgi27)                    | 0.60 |
| <i>D17H6S56E-5</i>   | NM_013481.1    | DNA segment, Chr 17, human D6S56E 5 (D17H6S56E-5)                              | 0.55 |
| <i>D17Wsu104e</i>    | NM_011794.3    |                                                                                | 0.56 |
| <i>D19Bwg1357e</i>   | NM_010238.3    | DNA segment, Chr 19, Brigham & Women's Genetics 1357 expressed (D19Bwg1357e)   | 0.48 |
| <i>D1ErtD471e</i>    | NM_178309.1    |                                                                                | 0.48 |
| <i>D2Bwg1335e</i>    | NM_144818      | DNA segment, Chr 2, Brigham & Women's Genetics 1335 expressed (D2Bwg1335e)     | 0.50 |
| <i>D2ErtD750e</i>    | NM_001080706.1 | DNA segment, Chr 2, ERATO Doi 750, expressed (D2ErtD750e)                      | 0.35 |
| <i>D4Bwg0951e</i>    | NM_001017525.1 | DNA segment, Chr 4, Brigham & Women's Genetics 0951 expressed (D4Bwg0951e)     | 0.52 |
| <i>D6Wsu176e</i>     | NM_145455.1    |                                                                                | 0.60 |
| <i>D930046M13Rik</i> | NM_007569.1    |                                                                                | 0.41 |
| <i>D9Wsu20e</i>      | NM_009773      |                                                                                | 0.58 |
| <i>Dad1</i>          | NM_009774.3    |                                                                                | 0.63 |
| <i>Dap3</i>          | NM_024285      | death associated protein 3 (Dap3), nuclear gene encoding mitochondrial protein | 0.67 |
| <i>Dazap1</i>        | NM_023323      |                                                                                | 0.33 |
| <i>Dbf4</i>          | NM_026396.2    | DBF4 homolog ( <i>S. cerevisiae</i> ) (Dbf4)                                   | 0.29 |
| <i>Dbt</i>           | NM_027371.2    | dihydroipoamide branched chain transacylase E2 (Dbt)                           | 0.61 |
| <i>Dbx2</i>          | NM_172449.1    |                                                                                | 0.56 |
| <i>Dclk1</i>         | NM_025824      | doublecortin-like kinase 1 (Dclk1)                                             | 0.27 |
| <i>Dcps</i>          | NM_025840.2    | decapping enzyme, scavenger (Dcps)                                             | 0.64 |

|                      |                |                                                                                                          |      |
|----------------------|----------------|----------------------------------------------------------------------------------------------------------|------|
| <i>Dcun1d5</i>       | NM_029881.2    | DCN1, defective in cullin neddylation 1, domain containing 5 ( <i>S. cerevisiae</i> ) ( <i>Dcun1d5</i> ) | 0.62 |
| <i>Ddost</i>         |                | dolichyl-di-phosphooligosaccharide-protein glycotransferase ( <i>Ddost</i> )                             | 0.55 |
| <i>Ddx1</i>          | NM_177287      | DEAD (Asp-Glu-Ala-Asp) box polypeptide 1 ( <i>Ddx1</i> )                                                 | 0.55 |
| <i>Ddx11</i>         |                |                                                                                                          | 0.39 |
| <i>Ddx20</i>         | XM_975397.2    | DEAD (Asp-Glu-Ala-Asp) box polypeptide 20 ( <i>Ddx20</i> )                                               | 0.59 |
| <i>Ddx21</i>         | NM_177914.1    | DEAD (Asp-Glu-Ala-Asp) box polypeptide 21 ( <i>Ddx21</i> )                                               | 0.53 |
| <i>Ddx25</i>         |                | DEAD (Asp-Glu-Ala-Asp) box polypeptide 25 ( <i>Ddx25</i> )                                               | 0.61 |
| <i>Ddx26</i>         | NM_178684.3    |                                                                                                          | 0.64 |
| <i>Ddx27</i>         | AK081724       | DEAD (Asp-Glu-Ala-Asp) box polypeptide 27 ( <i>Ddx27</i> )                                               | 0.65 |
| <i>Ddx3x</i>         | NM_021550.2    | DEAD/H (Asp-Glu-Ala-Asp/His) box polypeptide 3, X-linked ( <i>Ddx3x</i> )                                | 0.63 |
| <i>Ddx54</i>         | NM_207233.1    | DEAD (Asp-Glu-Ala-Asp) box polypeptide 54 ( <i>Ddx54</i> )                                               | 0.53 |
| <i>Ddx6</i>          | XM_976346.1    | DEAD (Asp-Glu-Ala-Asp) box polypeptide 6 ( <i>Ddx6</i> )                                                 | 0.57 |
| <i>Deb1</i>          | AK048765       | differentially expressed in B16F10 1 ( <i>Deb1</i> )                                                     | 0.48 |
| <i>Dek</i>           | AK082620       | DEK oncogene (DNA binding) ( <i>Dek</i> )                                                                | 0.61 |
| <i>Dennd2a</i>       | NM_207265.2    | DENN/MADD domain containing 2A ( <i>Dennd2a</i> )                                                        | 0.35 |
| <i>Dgkd</i>          | NM_176995.2    |                                                                                                          | 0.57 |
| <i>Dgkk</i>          | NM_009778.1    | diacylglycerol kinase kappa ( <i>Dgkk</i> )                                                              | 0.49 |
| <i>Dgkz</i>          |                | diacylglycerol kinase zeta ( <i>Dgkz</i> )                                                               | 0.47 |
| <i>Dhcr24</i>        | NM_172722.3    |                                                                                                          | 0.37 |
| <i>Dhcr7</i>         | NM_175286.3    | 7-dehydrocholesterol reductase ( <i>Dhcr7</i> )                                                          | 0.38 |
| <i>Dhh</i>           | NM_011413.2    | desert hedgehog ( <i>Dhh</i> )                                                                           | 0.42 |
| <i>Dhps</i>          | NM_009780.1    | deoxyhypusine synthase ( <i>Dhps</i> )                                                                   | 0.66 |
| <i>Dhrsx</i>         | XM_916109.2    | dehydrogenase/reductase (SDR family) X chromosome ( <i>Dhrsx</i> )                                       | 0.53 |
| <i>Dhx15</i>         |                | DEAH (Asp-Glu-Ala-His) box polypeptide 15 ( <i>Dhx15</i> ), transcript variant 2                         | 0.44 |
| <i>Dhx30</i>         | AK049826       | DEAH (Asp-Glu-Ala-His) box polypeptide 30 ( <i>Dhx30</i> )                                               | 0.65 |
| <i>Diras2</i>        | AK050233       |                                                                                                          | 0.55 |
| <i>Dlgap5</i>        | XM_127312      | discs, large ( <i>Drosophila</i> ) homolog-associated protein 5 ( <i>Dlgap5</i> )                        | 0.46 |
| <i>Dlst</i>          | NM_183148      |                                                                                                          | 0.51 |
| <i>Dnahc11</i>       | NM_172578.2    | dynein, axonemal, heavy chain 11 ( <i>Dnahc11</i> )                                                      | 0.32 |
| <i>Dnajb11</i>       |                |                                                                                                          | 0.47 |
| <i>Dnajc19</i>       | NM_198037.1    | DnaJ (Hsp40) homolog, subfamily C, member 19 ( <i>Dnajc19</i> ), transcript variant 2                    | 0.65 |
| <i>Dnajc2</i>        | NM_021415.3    | DnaJ (Hsp40) homolog, subfamily C, member 2 ( <i>Dnajc2</i> )                                            | 0.52 |
| <i>Dnmt1</i>         | NM_009785.1    | DNA methyltransferase (cytosine-5) 1 ( <i>Dnmt1</i> )                                                    | 0.36 |
| <i>Dock1</i>         | NM_146123.2    | dedicator of cytokinesis 1 ( <i>Dock1</i> )                                                              | 0.65 |
| <i>Dock10</i>        | NM_023525.1    |                                                                                                          | 0.43 |
| <i>Dos</i>           | NM_007589.4    | downstream of Stk11 ( <i>Dos</i> )                                                                       | 0.55 |
| <i>Dpm3</i>          | NM_007591.3    |                                                                                                          | 0.65 |
| <i>Dpp3</i>          | NM_007594.3    | dipeptidylpeptidase 3 ( <i>Dpp3</i> )                                                                    | 0.62 |
| <i>Dpy30</i>         | NM_133926.2    | dpy-30 homolog ( <i>C. elegans</i> ) ( <i>Dpy30</i> )                                                    | 0.56 |
| <i>Dpysl3</i>        | NM_007595.3    | dihydropyrimidinase-like 3 ( <i>Dpysl3</i> )                                                             | 0.60 |
| <i>Drg1</i>          | NM_178597.4    | developmentally regulated GTP binding protein 1 ( <i>Drg1</i> )                                          | 0.64 |
| <i>Dtymk</i>         | XM_990809.1    |                                                                                                          | 0.61 |
| <i>Dusp1</i>         | NM_145358.1    | dual specificity phosphatase 1 ( <i>Dusp1</i> )                                                          | 0.35 |
| <i>Dusp4</i>         | NM_001081557.1 | dual specificity phosphatase 4 ( <i>Dusp4</i> )                                                          | 0.36 |
| <i>Dusp6</i>         | XM_125901.8    | dual specificity phosphatase 6 ( <i>Dusp6</i> )                                                          | 0.10 |
| <i>Dusp7</i>         | NM_007600.2    | dual specificity phosphatase 7 ( <i>Dusp7</i> )                                                          | 0.29 |
| <i>Dynll1</i>        | NM_007602.3    | dynein light chain LC8-type 1 ( <i>Dynll1</i> )                                                          | 0.62 |
| <i>E030026I10Rik</i> | NM_016739.2    |                                                                                                          | 0.56 |
| <i>E130016E03Rik</i> | NM_009801.3    | RIKEN cDNA E130016E03 gene ( <i>E130016E03Rik</i> )                                                      | 0.33 |
| <i>E130306D19Rik</i> | NM_025821.2    |                                                                                                          | 0.48 |
| <i>E230013M07Rik</i> | NM_009806.2    |                                                                                                          | 0.31 |
| <i>E2f1</i>          | NM_009814.1    | E2F transcription factor 1 ( <i>E2f1</i> )                                                               | 0.32 |
| <i>E2f2</i>          | NM_009804.1    | E2F transcription factor 2 ( <i>E2f2</i> )                                                               | 0.54 |
| <i>E2f6</i>          | NM_022309.3    | E2F transcription factor 6 ( <i>E2f6</i> )                                                               | 0.64 |
| <i>E330016A19Rik</i> | NM_173047.2    | RIKEN cDNA E330016A19 gene ( <i>E330016A19Rik</i> )                                                      | 0.46 |
| <i>E430028B21Rik</i> | NM_007624      | RIKEN cDNA E430028B21 gene ( <i>E430028B21Rik</i> )                                                      | 0.64 |
| <i>E430039I23Rik</i> | NM_001076789.1 |                                                                                                          | 0.43 |
| <i>E530011J04Rik</i> | NM_172274.1    |                                                                                                          | 0.60 |
| <i>Ebna1bp2</i>      | NM_029339.2    | EBNA1 binding protein 2 ( <i>Ebna1bp2</i> )                                                              | 0.45 |
| <i>Ebp</i>           | NM_026964.3    | phenylalkylamine Ca2+ antagonist (emopamil) binding protein ( <i>Ebp</i> )                               | 0.66 |
| <i>Ece1</i>          | XM_355284.5    | endothelin converting enzyme 1 ( <i>Ece1</i> )                                                           | 0.53 |
| <i>Ecm1</i>          | NM_026222.2    | extracellular matrix protein 1 ( <i>Ecm1</i> )                                                           | 0.63 |
| <i>Edf1</i>          | NM_025918.3    | endothelial differentiation-related factor 1 ( <i>Edf1</i> )                                             | 0.56 |
| <i>Eef1a1</i>        | NM_198645.1    | eukaryotic translation elongation factor 1 alpha 1 ( <i>Eef1a1</i> )                                     | 0.62 |
| <i>Eef1b2</i>        | NM_023731.2    | eukaryotic translation elongation factor 1 beta 2 ( <i>Eef1b2</i> )                                      | 0.48 |
| <i>Eef1e1</i>        | NM_025725.2    | eukaryotic translation elongation factor 1 epsilon 1 ( <i>Eef1e1</i> )                                   | 0.33 |
| <i>Eef1g</i>         | NM_027411.1    | eukaryotic translation elongation factor 1 gamma ( <i>Eef1g</i> )                                        | 0.50 |
| <i>Efnb1</i>         | NM_172301.3    | ephrin B1 ( <i>Efnb1</i> )                                                                               | 0.66 |
| <i>Efs</i>           | NM_007631.1    | embryonal Fyn-associated substrate ( <i>Efs</i> )                                                        | 0.42 |

|                 |                |                                                                                                               |      |
|-----------------|----------------|---------------------------------------------------------------------------------------------------------------|------|
| <i>EG216185</i> | NM_009829      | PREDICTED: predicted gene, EG216185 (EG216185)                                                                | 0.50 |
| <i>EG237361</i> | NM_001037134.1 | PREDICTED: predicted gene, EG237361 (EG237361)                                                                | 0.36 |
| <i>EG243642</i> | NM_009831.2    | PREDICTED: predicted gene, EG243642 (EG243642)                                                                | 0.41 |
| <i>EG245297</i> | NM_023243.4    | predicted gene, EG245297 (EG245297)                                                                           | 0.64 |
| <i>EG268795</i> | NM_001097644.1 | PREDICTED: predicted gene, EG268795, transcript variant 4 (EG268795)                                          | 0.45 |
| <i>EG269105</i> | NM_053180.2    | PREDICTED: predicted gene, EG269105 (EG269105)                                                                | 0.57 |
| <i>EG382843</i> | NM_009836.1    | PREDICTED: predicted gene, EG382843 (EG382843)                                                                | 0.51 |
| <i>EG432448</i> | NM_009837.1    | PREDICTED: predicted gene, EG432448, transcript variant 1 (EG432448)                                          | 0.63 |
| <i>EG432681</i> | NM_009838.1    | PREDICTED: predicted gene, EG432681 (EG432681)                                                                | 0.47 |
| <i>EG432721</i> | NM_009840.3    | PREDICTED: predicted gene, EG432721 (EG432721)                                                                | 0.39 |
| <i>EG432879</i> | NM_153098.2    | predicted gene, EG432879 (EG432879)                                                                           | 0.58 |
| <i>EG433144</i> | NM_016898.2    | PREDICTED: predicted gene, EG433144 (EG433144)                                                                | 0.62 |
| <i>EG433182</i> | NM_133983.3    | predicted gene, EG433182 (EG433182)                                                                           | 0.58 |
| <i>EG433923</i> | NM_007652.2    | predicted gene, EG433923 (EG433923)                                                                           | 0.53 |
| <i>EG434404</i> | NM_007656.4    | PREDICTED: predicted gene, EG434404 (EG434404)                                                                | 0.57 |
| <i>EG434858</i> | NM_009858      | predicted gene, EG434858 (EG434858), non-coding RNA.                                                          | 0.64 |
| <i>EG545056</i> | NM_023223.1    | predicted gene, EG545056 (EG545056), non-coding RNA.                                                          | 0.65 |
| <i>EG622236</i> | NM_007658.3    | PREDICTED: predicted gene, EG622236, transcript variant 1 (EG622236)                                          | 0.49 |
| <i>EG622339</i> | NM_009860.2    | predicted gene, EG622339 (EG622339)                                                                           | 0.51 |
| <i>EG623818</i> | NM_007659.3    | PREDICTED: predicted gene, EG623818 (EG623818)                                                                | 0.57 |
| <i>EG624124</i> | NM_009861.1    | PREDICTED: predicted gene, EG624124, transcript variant 1 (EG624124)                                          | 0.48 |
| <i>EG625054</i> | NM_027219.3    | predicted gene, EG625054 (EG625054), non-coding RNA.                                                          | 0.58 |
| <i>EG625917</i> | NM_020006.1    | PREDICTED: predicted gene, EG625917 (EG625917)                                                                | 0.49 |
| <i>EG626175</i> | NM_172395.2    | PREDICTED: predicted gene, EG626175 (EG626175)                                                                | 0.40 |
| <i>EG629595</i> | NM_009862.1    | PREDICTED: predicted gene, EG629595 (EG629595)                                                                | 0.42 |
| <i>EG632248</i> | NM_152810.1    | PREDICTED: predicted gene, EG632248 (EG632248)                                                                | 0.42 |
| <i>EG633120</i> | NM_011799.2    | PREDICTED: predicted gene, EG633120 (EG633120), misc RNA.                                                     | 0.53 |
| <i>EG637748</i> | NM_009863.2    | PREDICTED: predicted gene, EG637748 (EG637748)                                                                | 0.49 |
| <i>EG665369</i> | NM_175384.3    | PREDICTED: predicted gene, EG665369 (EG665369)                                                                | 0.52 |
| <i>EG666577</i> | NM_013538.4    | PREDICTED: predicted gene, EG666577 (EG666577)                                                                | 0.45 |
| <i>EG666609</i> | NM_028023.3    | PREDICTED: predicted gene, EG666609 (EG666609)                                                                | 0.61 |
| <i>EG667190</i> | NM_026410.1    | PREDICTED: predicted gene, EG667190 (EG667190), misc RNA.                                                     | 0.30 |
| <i>EG667728</i> | NM_025866.3    | PREDICTED: predicted gene, EG667728 (EG667728), misc RNA.                                                     | 0.22 |
| <i>EG668668</i> | NM_026560.3    | predicted gene, EG668668 (EG668668)                                                                           | 0.65 |
| <i>EG668829</i> | NM_019707.4    | PREDICTED: predicted gene, EG668829 (EG668829)                                                                | 0.53 |
| <i>EG668850</i> | NM_183417.2    | PREDICTED: predicted gene, EG668850 (EG668850), misc RNA.                                                     | 0.51 |
| <i>Egr1</i>     | NM_009870.2    | early growth response 1 (Egr1)                                                                                | 0.60 |
| <i>Ehd4</i>     | NM_153599.3    | EH-domain containing 4 (Ehd4)                                                                                 | 0.35 |
| <i>Eif1a</i>    | NM_007669.2    | eukaryotic translation initiation factor 1A (Eif1a)                                                           | 0.61 |
| <i>Eif1ad</i>   | NM_029976.2    | eukaryotic translation initiation factor 1A domain containing (Eif1ad)                                        | 0.46 |
| <i>Eif2b3</i>   | XM_919022.2    |                                                                                                               | 0.56 |
| <i>Eif2s2</i>   | NM_033037.3    | eukaryotic translation initiation factor 2, subunit 2 (beta) (Eif2s2)                                         | 0.61 |
| <i>Eif2s3x</i>  | AK040711       | eukaryotic translation initiation factor 2, subunit 3, structural gene X-linked (Eif2s3x)                     | 0.56 |
| <i>Eif3a</i>    | NM_007672.1    | eukaryotic translation initiation factor 3, subunit A (Eif3a)                                                 | 0.50 |
| <i>Eif3b</i>    | NM_001080929.1 | eukaryotic translation initiation factor 3, subunit B (Eif3b)                                                 | 0.66 |
| <i>Eif3d</i>    | NM_026014.3    | eukaryotic translation initiation factor 3, subunit D (Eif3d)                                                 | 0.59 |
| <i>Eif3eip</i>  | NM_007679.4    | eukaryotic translation initiation factor 3, subunit E interacting protein (Eif3eip)                           | 0.65 |
| <i>Eif3f</i>    | NM_009886.2    | eukaryotic translation initiation factor 3, subunit F (Eif3f)                                                 | 0.66 |
| <i>Eif3g</i>    | NM_007681.2    | eukaryotic translation initiation factor 3, subunit G (Eif3g)                                                 | 0.49 |
| <i>Eif3i</i>    | NM_007682.2    | eukaryotic translation initiation factor 3, subunit I (Eif3i)                                                 | 0.58 |
| <i>Eif3k</i>    | XM_916605.2    | eukaryotic translation initiation factor 3, subunit K (Eif3k)                                                 | 0.62 |
| <i>Eif3s4</i>   | NM_145924.2    |                                                                                                               | 0.46 |
| <i>Eif3s5</i>   | NM_021790.1    |                                                                                                               | 0.65 |
| <i>Eif4a1</i>   | NM_027429.1    | eukaryotic translation initiation factor 4A1 (Eif4a1)                                                         | 0.28 |
| <i>Eif4a3</i>   | NM_178269.3    | eukaryotic translation initiation factor 4A, isoform 3 (Eif4a3)                                               | 0.66 |
| <i>Eif4ebp1</i> | NM_028131.3    | eukaryotic translation initiation factor 4E binding protein 1 (Eif4ebp1)                                      | 0.51 |
| <i>Eif4el3</i>  | NM_025495.1    |                                                                                                               | 0.55 |
| <i>Eif4g1</i>   | NM_031863.3    | eukaryotic translation initiation factor 4, gamma 1 (Eif4g1), transcript variant 2                            | 0.61 |
| <i>Eif5</i>     | XM_001001363.1 | eukaryotic translation initiation factor 5 (Eif5), transcript variant 1                                       | 0.58 |
| <i>Eif5a</i>    | NM_001081091.1 | eukaryotic translation initiation factor 5A (Eif5a)                                                           | 0.39 |
| <i>Eif6</i>     | NM_001099637.1 | eukaryotic translation initiation factor 6 (Eif6)                                                             | 0.62 |
| <i>Elavl1</i>   | NM_028760.1    | ELAV (embryonic lethal, abnormal vision, Drosophila)-like 1 (Hu antigen R) (Elavl1)                           | 0.52 |
| <i>Elk3</i>     | NM_198019.2    | ELK3, member of ETS oncogene family (Elk3), transcript variant 2                                              | 0.43 |
| <i>Elmo1</i>    | NM_207298.2    | engulfment and cell motility 1, ced-12 homolog (C. elegans) (Elmo1), transcript variant 2                     | 0.58 |
| <i>Elov11</i>   | NM_007684.3    | elongation of very long chain fatty acids (FEN1/Elo2, SUR4/Elo3, yeast)-like 1 (Elov11), transcript variant 2 | 0.51 |
| <i>Elov14</i>   | NM_145825.1    | elongation of very long chain fatty acids (FEN1/Elo2, SUR4/Elo3, yeast)-like 4 (Elov14)                       | 0.63 |

|                      |                |                                                                                                        |      |
|----------------------|----------------|--------------------------------------------------------------------------------------------------------|------|
| <i>Elov15</i>        | NM_007687.2    | ELOVL family member 5, elongation of long chain fatty acids (yeast) (Elov15)                           | 0.62 |
| <i>Elov16</i>        | NM_008823.3    | ELOVL family member 6, elongation of long chain fatty acids (yeast) (Elov16)                           | 0.21 |
| <i>Emg1</i>          | NM_178647.2    | EMG1 nucleolar protein homolog (S. cerevisiae) (Emg1)                                                  | 0.53 |
| <i>Eno1</i>          | NM_013733.3    | enolase 1, alpha non-neuron (Eno1)                                                                     | 0.39 |
| <i>Entpd4</i>        | NM_028083.3    | ectonucleoside triphosphate diphosphohydrolase 4 (Entpd4)                                              | 0.52 |
| <i>Epn2</i>          | NM_025366.2    |                                                                                                        | 0.20 |
| <i>Erc1</i>          | NM_133928.2    | excision repair cross-complementing rodent repair deficiency, complementation group 1 (Erc1)           | 0.64 |
| <i>Ergic1</i>        | AK021188       | endoplasmic reticulum-golgi intermediate compartment (ERGIC) 1 (Ergic1)                                | 0.39 |
| <i>Ergic2</i>        | NM_007695.2    | ERGIC and golgi 2 (Ergic2), transcript variant 1                                                       | 0.59 |
| <i>Erh</i>           | NM_001025566.1 | enhancer of rudimentary homolog (Drosophila) (Erh)                                                     | 0.58 |
| <i>Erlin1</i>        | NM_029362.3    | ER lipid raft associated 1 (Erlin1)                                                                    | 0.62 |
| <i>Ermp1</i>         | NM_134078.3    | endoplasmic reticulum metalloproteinase 1 (Ermp1)                                                      | 0.32 |
| <i>Erp29</i>         | NM_023543.1    | endoplasmic reticulum protein 29 (Erp29)                                                               | 0.64 |
| <i>Errf1</i>         | NM_033269.2    | ERBB receptor feedback inhibitor 1 (Errf1)                                                             | 0.62 |
| <i>Esco2</i>         | NM_021439.2    | establishment of cohesion 1 homolog 2 (S. cerevisiae) (Esco2)                                          | 0.31 |
| <i>Esp1</i>          | NM_018763.1    | extra spindle poles-like 1 (S. cerevisiae) (Esp1)                                                      | 0.65 |
| <i>Esrra</i>         | NM_021715.1    | estrogen related receptor, alpha (Esrra)                                                               | 0.55 |
| <i>Esrrb</i>         | NM_145409.1    | estrogen related receptor, beta (Esrrb)                                                                | 0.52 |
| <i>Etf1</i>          | NM_011574.1    | eukaryotic translation termination factor 1 (Etf1)                                                     | 0.54 |
| <i>Ets1</i>          | XM_134100.3    | E26 avian leukemia oncogene 1, 5' domain (Ets1), transcript variant 2                                  | 0.66 |
| <i>Ets2</i>          | NM_181589.2    | E26 avian leukemia oncogene 2, 3' domain (Ets2)                                                        | 0.48 |
| <i>Etv1</i>          | NM_029437.1    | ets variant gene 1 (Etv1)                                                                              | 0.35 |
| <i>Etv4</i>          | NM_008770.2    | ets variant gene 4 (E1A enhancer binding protein, E1AF) (Etv4)                                         | 0.38 |
| <i>Etv5</i>          | NM_171826.2    | ets variant gene 5 (Etv5)                                                                              | 0.22 |
| <i>Exosc1</i>        | NM_033444.1    | exosome component 1 (Exosc1)                                                                           | 0.55 |
| <i>Exosc2</i>        | NM_013885.2    | exosome component 2 (Exosc2)                                                                           | 0.66 |
| <i>Exosc6</i>        | NM_030179.2    | exosome component 6 (Exosc6)                                                                           | 0.65 |
| <i>Exosc7</i>        | NM_001042634.1 | exosome component 7 (Exosc7)                                                                           | 0.64 |
| <i>Exosc8</i>        | NM_007714.2    | exosome component 8 (Exosc8)                                                                           | 0.51 |
| <i>Ext1</i>          | XM_127882.3    | exostoses (multiple) 1 (Ext1)                                                                          | 0.61 |
| <i>Extl3</i>         | NM_023671.1    | exostoses (multiple)-like 3 (Extl3)                                                                    | 0.58 |
| <i>Ezh2</i>          | NM_017393.1    | enhancer of zeste homolog 2 (Drosophila) (Ezh2)                                                        | 0.35 |
| <i>F2r</i>           | NM_175554.3    | coagulation factor II (thrombin) receptor (F2r)                                                        | 0.36 |
| <i>F630043A04Rik</i> | NM_001080385.1 | RIKEN cDNA F630043A04 gene (F630043A04Rik)                                                             | 0.58 |
| <i>Faah</i>          | NM_001003908   | fatty acid amide hydrolase (Faah)                                                                      | 0.66 |
| <i>Fabp5</i>         | NM_009908.1    | fatty acid binding protein 5, epidermal (Fabp5)                                                        | 0.30 |
| <i>Fabp7</i>         | NM_026442.2    |                                                                                                        | 0.58 |
| <i>Faf1</i>          | NM_023160.1    | Fas-associated factor 1 (Faf1)                                                                         | 0.58 |
| <i>Fahd1</i>         | NM_023455.2    | fumarylacetoacetate hydrolase domain containing 1 (Fahd1), nuclear gene encoding mitochondrial protein | 0.62 |
| <i>Fam101a</i>       | NM_025647.2    | family with sequence similarity 101, member A (Fam101a)                                                | 0.48 |
| <i>Fam108a</i>       | NM_026066.2    | family with sequence similarity 108, member A (Fam108a)                                                | 0.64 |
| <i>Fam110a</i>       | NM_009919.1    | family with sequence similarity 110, member A (Fam110a), transcript variant 1                          | 0.54 |
| <i>Fam120a</i>       | NM_030131.2    | family with sequence similarity 120, member A (Fam120a)                                                | 0.56 |
| <i>Fam125a</i>       | NM_009923.1    | family with sequence similarity 125, member A (Fam125a)                                                | 0.65 |
| <i>Fam131a</i>       | AK039251       | family with sequence similarity 131, member A (Fam131a)                                                | 0.42 |
| <i>Fam171a1</i>      | NM_130457      | family with sequence similarity 171, member A1 (Fam171a1)                                              | 0.49 |
| <i>Fam173a</i>       | NM_028266.4    | family with sequence similarity 173, member A (Fam173a)                                                | 0.55 |
| <i>Fam84a</i>        | NM_009929.2    | family with sequence similarity 84, member A (Fam84a)                                                  | 0.38 |
| <i>Fancd2</i>        | XM_907370.3    | Fanconi anemia, complementation group D2 (Fancd2)                                                      | 0.66 |
| <i>Fance</i>         | NM_153393.1    | PREDICTED: Fanconi anemia, complementation group E (Fance)                                             | 0.56 |
| <i>Farsb</i>         | NM_199473      | phenylalanyl-tRNA synthetase, beta subunit (Farsb)                                                     | 0.42 |
| <i>Fastk</i>         | NM_144514.2    | Fas-activated serine/threonine kinase (Fastk)                                                          | 0.61 |
| <i>Fblim1</i>        | AK018238       | filamin binding LIM protein 1 (Fblim1)                                                                 | 0.55 |
| <i>Fbln1</i>         | NM_012002.3    | fibulin 1 (Fbln1)                                                                                      | 0.37 |
| <i>Fbln2</i>         | NM_012003.1    | fibulin 2 (Fbln2), transcript variant 2                                                                | 0.17 |
| <i>Fbn1</i>          | NM_009940.2    |                                                                                                        | 0.64 |
| <i>Fbxl10</i>        | NM_011779.3    | F-box and leucine-rich repeat protein 10 (Fbxl10), transcript variant 3                                | 0.51 |
| <i>Fbxl14</i>        | NM_178379.2    | F-box and leucine-rich repeat protein 14 (Fbxl14)                                                      | 0.51 |
| <i>Fbxl4</i>         | NM_001017429.2 | F-box and leucine-rich repeat protein 4 (Fbxl4)                                                        | 0.67 |
| <i>Fbxo9</i>         | NM_001033310.1 | f-box protein 9 (Fbxo9), transcript variant 1                                                          | 0.62 |
| <i>Fchsd2</i>        | NM_007747.2    | FCH and double SH3 domains 2 (Fchsd2)                                                                  | 0.63 |
| <i>Fcmd</i>          | NM_009942      |                                                                                                        | 0.65 |
| <i>Fdps</i>          | NM_007748.2    | farnesyl diphosphate synthetase (Fdps)                                                                 | 0.14 |
| <i>Fen1</i>          | NM_025628.2    | flap structure specific endonuclease 1 (Fen1)                                                          | 0.35 |
| <i>Fgf1</i>          | NM_053071.2    | fibroblast growth factor 1 (Fgf1)                                                                      | 0.64 |
| <i>Fgf22</i>         | NM_009945.3    | fibroblast growth factor 22 (Fgf22)                                                                    | 0.62 |
| <i>Fgfr1op2</i>      | NM_009187.1    | FGFR1 oncogene partner 2 (Fgfr1op2)                                                                    | 0.60 |
| <i>Fh1</i>           | NM_013494.2    | fumarate hydratase 1 (Fh1)                                                                             | 0.37 |

|                |                |                                                                                               |      |
|----------------|----------------|-----------------------------------------------------------------------------------------------|------|
| <i>Fibp</i>    | NM_007756.2    | fibroblast growth factor (acidic) intracellular binding protein (Fibp)                        | 0.51 |
| <i>Flgn1</i>   | NM_001033851.1 | fidgetin-like 1 (Flgn1)                                                                       | 0.27 |
| <i>Fkbp11</i>  | NM_029720.1    | FK506 binding protein 11 (Fkbp11)                                                             | 0.39 |
| <i>Fkbp1a</i>  | NM_018776.1    | FK506 binding protein 1a (Fkbp1a)                                                             | 0.44 |
| <i>Fkbp2</i>   | NM_019922.1    | FK506 binding protein 2 (Fkbp2)                                                               | 0.60 |
| <i>Fkbp4</i>   | NM_009964.1    | FK506 binding protein 4 (Fkbp4)                                                               | 0.48 |
| <i>Fkbp5</i>   | NM_009967.1    | FK506 binding protein 5 (Fkbp5)                                                               | 0.64 |
| <i>Fmnl2</i>   | NM_026444.3    | formin-like 2 (Fmnl2)                                                                         | 0.39 |
| <i>Fndc3b</i>  | NM_144942      | fibronectin type III domain containing 3B (Fndc3b)                                            | 0.35 |
| <i>Foxk2</i>   | NM_139117.2    | forkhead box K2 (Foxk2)                                                                       | 0.56 |
| <i>Foxm1</i>   | NM_144901.2    | forkhead box M1 (Foxm1)                                                                       | 0.45 |
| <i>Foxp3</i>   | NM_023565.2    | forkhead box P3 (Foxp3)                                                                       | 0.63 |
| <i>Foxred1</i> | NM_172753.3    | FAD-dependent oxidoreductase domain containing 1 (Foxred1)                                    | 0.64 |
| <i>Fpgs</i>    | NM_007783.2    | folylpolyglutamyl synthetase (Fpgs)                                                           | 0.62 |
| <i>Frmd4a</i>  | NM_027874.2    |                                                                                               | 0.40 |
| <i>Fscn1</i>   | NM_013767.5    | fascin homolog 1, actin bundling protein (Strongylocentrotus purpuratus) (Fscn1)              | 0.32 |
| <i>Ftl1</i>    | NM_134002.1    |                                                                                               | 0.63 |
| <i>Fubp1</i>   | AK031617       |                                                                                               | 0.65 |
| <i>Fus</i>     | NM_009974.2    |                                                                                               | 0.51 |
| <i>Fut8</i>    | NM_013884.2    | fucosyltransferase 8 (Fut8)                                                                   | 0.35 |
| <i>Fxc1</i>    | NM_026493.3    | fractured callus expressed transcript 1 (Fxc1)                                                | 0.42 |
| <i>Fxn</i>     | NM_007792.3    | frataxin (Fxn)                                                                                | 0.51 |
| <i>Fxr1h</i>   | NM_009976.3    |                                                                                               | 0.63 |
| <i>Fxr2</i>    | NM_024199.2    | fragile X mental retardation, autosomal homolog 2 (Fxr2)                                      | 0.63 |
| <i>Fyn</i>     | NM_146012.1    | Fyn proto-oncogene (Fyn)                                                                      | 0.57 |
| <i>Fzd1</i>    | NM_010217      | frizzled homolog 1 (Drosophila) (Fzd1)                                                        | 0.58 |
| <i>Fzr1</i>    | NM_009819.1    | fizzy/cell division cycle 20 related 1 (Drosophila) (Fzr1)                                    | 0.56 |
| <i>G3bp1</i>   | NM_018761.2    | Ras-GTPase-activating protein SH3-domain binding protein 1 (G3bp1)                            | 0.44 |
| <i>G3bp2</i>   | NM_016748.1    | GTPase activating protein (SH3 domain) binding protein 2 (G3bp2), transcript variant 1        | 0.60 |
| <i>Gaa</i>     | NM_001038492.1 | glucosidase, alpha, acid (Gaa)                                                                | 0.63 |
| <i>Gad1</i>    | NM_009982.3    | glutamic acid decarboxylase 1 (Gad1)                                                          | 0.53 |
| <i>Gadd45a</i> | NM_007801.1    | growth arrest and DNA-damage-inducible 45 alpha (Gadd45a)                                     | 0.41 |
| <i>Galnt1</i>  | NM_030249.3    | UDP-N-acetyl-alpha-D-galactosamine:polypeptide N-acetylgalactosaminyltransferase 1 (Galnt1)   | 0.56 |
| <i>Galnt10</i> | NM_198683.1    | UDP-N-acetyl-alpha-D-galactosamine:polypeptide N-acetylgalactosaminyltransferase 10 (Galnt10) | 0.53 |
| <i>Galnt2</i>  | NM_010160.2    | UDP-N-acetyl-alpha-D-galactosamine:polypeptide N-acetylgalactosaminyltransferase 2 (Galnt2)   | 0.59 |
| <i>Ganab</i>   | NM_016716.4    | alpha glucosidase 2 alpha neutral subunit (Ganab)                                             | 0.55 |
| <i>Gap43</i>   | NM_009142.3    | growth associated protein 43 (Gap43)                                                          | 0.31 |
| <i>Gapdh</i>   | NM_001025192.2 | glyceraldehyde-3-phosphate dehydrogenase (Gapdh)                                              | 0.44 |
| <i>Gars</i>    | NM_008176.1    | glycyl-tRNA synthetase (Gars)                                                                 | 0.47 |
| <i>Gart</i>    | NM_019932.2    | phosphoribosylglycinamide formyltransferase (Gart)                                            | 0.65 |
| <i>Gas2l3</i>  | NM_009911.2    | growth arrest-specific 2 like 3 (Gas2l3), transcript variant 2                                | 0.27 |
| <i>Gas7</i>    | NM_025567.2    | growth arrest specific 7 (Gas7)                                                               | 0.61 |
| <i>Gatad1</i>  | NM_007808.4    | GATA zinc finger domain containing 1 (Gatad1)                                                 | 0.56 |
| <i>Gcap14</i>  | NM_180962.1    | granule cell antiserum positive 14 (Gcap14), transcript variant 2                             | 0.41 |
| <i>Gcap27</i>  | NM_009994.1    |                                                                                               | 0.62 |
| <i>Gcat</i>    | NM_130882.1    |                                                                                               | 0.37 |
| <i>Gcs1</i>    | NM_022434.1    | glucosidase 1 (Gcs1)                                                                          | 0.41 |
| <i>Gdf15</i>   | NM_133969.2    | growth differentiation factor 15 (Gdf15)                                                      | 0.27 |
| <i>Gdpd1</i>   | NM_020010.2    | glycerophosphodiester phosphodiesterase domain containing 1 (Gdpd1)                           | 0.57 |
| <i>Gemin4</i>  | NM_007825.3    | gem (nuclear organelle) associated protein 4 (Gemin4)                                         | 0.56 |
| <i>Gfm1</i>    | AK050914       | G elongation factor, mitochondrial 1 (Gfm1)                                                   | 0.52 |
| <i>Gga2</i>    | AK083512       | golgi associated, gamma adaptin ear containing, ARF binding protein 2 (Gga2)                  | 0.65 |
| <i>Gins2</i>   | NM_177640.4    | GINS complex subunit 2 (Psf2 homolog) (Gins2)                                                 | 0.53 |
| <i>Gipc1</i>   | NM_053078.3    | GIPC PDZ domain containing family, member 1 (Gipc1)                                           | 0.52 |
| <i>Glb1</i>    | NM_001013379.2 | galactosidase, beta 1 (Glb1)                                                                  | 0.50 |
| <i>Glg1</i>    | NM_026065.2    |                                                                                               | 0.59 |
| <i>Glrx1</i>   | NM_028027.2    |                                                                                               | 0.66 |
| <i>Glrx2</i>   | NM_026579.2    | glutaredoxin 2 (thioltransferase) (Glrx2), transcript variant 1                               | 0.59 |
| <i>Glrx3</i>   | NM_145422.3    | glutaredoxin 3 (Glrx3)                                                                        | 0.61 |
| <i>Glrx5</i>   | NM_029758.3    | glutaredoxin 5 homolog (S. cerevisiae) (Glrx5)                                                | 0.53 |
| <i>Glt25d1</i> | NM_198023      | glycosyltransferase 25 domain containing 1 (Glt25d1)                                          | 0.39 |
| <i>Gm444</i>   |                | PREDICTED: gene model 444, (NCBI) (Gm444)                                                     | 0.62 |
| <i>Gm561</i>   | NM_134100.2    | gene model 561, (NCBI) (Gm561)                                                                | 0.41 |
| <i>Gmids</i>   | NM_138583.1    | GDP-mannose 4, 6-dehydratase (Gmids)                                                          | 0.57 |
| <i>Gmpr2</i>   | NM_033075.2    | guanosine monophosphate reductase 2 (Gmpr2)                                                   | 0.61 |
| <i>Gmps</i>    | NM_080837.1    | guanine monophosphate synthetase (Gmps)                                                       | 0.61 |

|                  |                |                                                                                                          |      |
|------------------|----------------|----------------------------------------------------------------------------------------------------------|------|
| <i>Gna11</i>     | NM_177474.4    |                                                                                                          | 0.63 |
| <i>Gnai1</i>     |                | guanine nucleotide binding protein (G protein), alpha inhibiting 1 (Gnai1)                               | 0.50 |
| <i>Gnaq</i>      | AK051822       | guanine nucleotide binding protein, alpha q polypeptide (Gnaq)                                           | 0.66 |
| <i>Gnb1</i>      | NM_026828.2    | guanine nucleotide binding protein (G protein), beta 1 (Gnb1)                                            | 0.49 |
| <i>Gnb4</i>      | NM_026412.1    | guanine nucleotide binding protein (G protein), beta 4 (Gnb4)                                            | 0.57 |
| <i>Gne</i>       | NM_177617.2    |                                                                                                          | 0.66 |
| <i>Gng12</i>     | NM_001081022.1 |                                                                                                          | 0.39 |
| <i>Gng2</i>      | NM_026821.4    | guanine nucleotide binding protein (G protein), gamma 2 (Gng2), transcript variant 2                     | 0.64 |
| <i>Gnl3</i>      |                | guanine nucleotide binding protein-like 3 (nucleolar) (Gnl3), transcript variant 2                       | 0.36 |
| <i>Gnpda1</i>    | NM_001081232.1 | glucosamine-6-phosphate deaminase 1 (Gnpda1)                                                             | 0.48 |
| <i>Golga3</i>    | NM_207274.1    | golgi autoantigen, golgin subfamily a, 3 (Golga3)                                                        | 0.66 |
| <i>Golim4</i>    | NM_138587.3    | golgi integral membrane protein 4 (Golim4)                                                               | 0.60 |
| <i>Golm1</i>     | NM_172681.2    | golgi membrane protein 1 (Golm1), transcript variant 2                                                   | 0.21 |
| <i>Gorasp2</i>   |                | golgi reassembly stacking protein 2 (Gorasp2)                                                            | 0.49 |
| <i>Got2</i>      | NM_028181      | glutamate oxaloacetate transaminase 2, mitochondrial (Got2), nuclear gene encoding mitochondrial protein | 0.41 |
| <i>Gpd1</i>      | NM_133718      | glycerol-3-phosphate dehydrogenase 1 (soluble) (Gpd1)                                                    | 0.58 |
| <i>Gpd2</i>      | NM_010015.1    | glycerol phosphate dehydrogenase 2, mitochondrial (Gpd2), nuclear gene encoding mitochondrial protein    | 0.57 |
| <i>Gpi1</i>      | NM_022994.2    | glucose phosphate isomerase 1 (Gpi1)                                                                     | 0.47 |
| <i>Gpnmb</i>     | NM_134062.1    | glycoprotein (transmembrane) nmb (Gpnmb)                                                                 | 0.40 |
| <i>Gpr162</i>    | NM_010045.2    | G protein-coupled receptor 162 (Gpr162)                                                                  | 0.54 |
| <i>Gpsm1</i>     | AK010657       | G-protein signalling modulator 1 (AGS3-like, C. elegans) (Gpsm1)                                         | 0.58 |
| <i>Gpsn2</i>     | NM_013726.2    | glycoprotein, synaptic 2 (Gpsn2)                                                                         | 0.62 |
| <i>Grcc10</i>    | NM_010022.1    | gene rich cluster, C10 gene (Grcc10)                                                                     | 0.54 |
| <i>Gria3</i>     | XM_147966.3    | glutamate receptor, ionotropic, AMPA3 (alpha 3) (Gria3)                                                  | 0.60 |
| <i>Grip1</i>     | NM_019978.2    |                                                                                                          | 0.56 |
| <i>Grm5</i>      | NM_027030.2    | glutamate receptor, metabotropic 5 (Grm5)                                                                | 0.16 |
| <i>Grwd1</i>     | NM_029775.2    | glutamate-rich WD repeat containing 1 (Grwd1)                                                            | 0.59 |
| <i>Gsg2</i>      | NM_028119.2    | germ cell-specific gene 2 (Gsg2)                                                                         | 0.56 |
| <i>Gspt1</i>     | NM_027442.4    | G1 to S phase transition 1 (Gspt1)                                                                       | 0.44 |
| <i>Gstm5</i>     | NM_007838.2    | glutathione S-transferase, mu 5 (Gstm5)                                                                  | 0.56 |
| <i>Gstp1</i>     | NM_007584.2    | glutathione S-transferase, pi 1 (Gstp1)                                                                  | 0.53 |
| <i>Gstt1</i>     | NM_134040.1    | glutathione S-transferase, theta 1 (Gstt1)                                                               | 0.52 |
| <i>Gtf2e2</i>    | XM_128714.3    | general transcription factor II E, polypeptide 2 (beta subunit) (Gtf2e2)                                 | 0.58 |
| <i>Gtf2f2</i>    | NM_017397.2    | general transcription factor IIF, polypeptide 2 (Gtf2f2)                                                 | 0.63 |
| <i>Gtf2h2</i>    | NM_019553.2    | general transcription factor II H, polypeptide 2 (Gtf2h2)                                                | 0.65 |
| <i>Gtf3a</i>     | NM_013932.3    | general transcription factor III A (Gtf3a)                                                               | 0.61 |
| <i>Gtf3c1</i>    | NM_008715      | general transcription factor III C 1 (Gtf3c1)                                                            | 0.65 |
| <i>Gtpbp3</i>    | NM_153065.3    | GTP binding protein 3 (Gtpbp3), nuclear gene encoding mitochondrial protein                              | 0.41 |
| <i>Gtpbp4</i>    | NM_010028.2    | GTP binding protein 4 (Gtpbp4)                                                                           | 0.52 |
| <i>Gtse1</i>     | NM_012008.1    | G two S phase expressed protein 1 (Gtse1)                                                                | 0.47 |
| <i>Gusb</i>      | NM_028041.2    | glucuronidase, beta (Gusb)                                                                               | 0.57 |
| <i>H1fx</i>      | NM_007841.3    | H1 histone family, member X (H1fx)                                                                       | 0.65 |
| <i>H2afx</i>     | NM_026794.2    | H2A histone family, member X (H2afx)                                                                     | 0.26 |
| <i>H2afz</i>     | NM_025900.1    | H2A histone family, member Z (H2afz)                                                                     | 0.21 |
| <i>Hat1</i>      | NM_172477.3    | histone aminotransferase 1 (Hat1)                                                                        | 0.42 |
| <i>Hbegf</i>     |                | heparin-binding EGF-like growth factor (Hbegf)                                                           | 0.42 |
| <i>Hccs</i>      | NM_177914.2    | holocytochrome c synthetase (Hccs)                                                                       | 0.61 |
| <i>Hdac2</i>     | NM_138306.1    |                                                                                                          | 0.44 |
| <i>Hdgf</i>      | XM_131538.1    | hepatoma-derived growth factor (Hdgf)                                                                    | 0.65 |
| <i>Heatr1</i>    | NM_007856.2    | HEAT repeat containing 1 (Heatr1)                                                                        | 0.52 |
| <i>Hectd1</i>    | NM_007857.3    | PREDICTED: HECT domain containing 1 (Hectd1)                                                             | 0.56 |
| <i>Hectd2</i>    | NM_001039514.1 | HECT domain containing 2 (Hectd2)                                                                        | 0.29 |
| <i>Herc4</i>     | NM_026819.2    | hect domain and RLD 4 (Herc4)                                                                            | 0.66 |
| <i>Hes1</i>      | NM_001033326.2 | hairy and enhancer of split 1 (Drosophila) (Hes1)                                                        | 0.55 |
| <i>Hes6</i>      | NM_007839.2    | hairy and enhancer of split 6 (Drosophila) (Hes6)                                                        | 0.66 |
| <i>Hif1a</i>     | NM_133347.1    | hypoxia inducible factor 1, alpha subunit (Hif1a)                                                        | 0.64 |
| <i>Hint1</i>     | NM_133941.2    | histidine triad nucleotide binding protein 1 (Hint1)                                                     | 0.54 |
| <i>Hip1</i>      | NM_011805.2    | huntingtin interacting protein 1 (Hip1)                                                                  | 0.12 |
| <i>HIP-1</i>     | NM_145217.2    |                                                                                                          | 0.52 |
| <i>Hip2</i>      |                |                                                                                                          | 0.53 |
| <i>Hirip3</i>    | NM_178118      | HIRA interacting protein 3 (Hirip3)                                                                      | 0.45 |
| <i>Hist1h2ad</i> | NM_177639.5    | histone cluster 1, H2ad (Hist1h2ad)                                                                      | 0.09 |
| <i>Hist1h2af</i> | NM_144553.1    | histone cluster 1, H2af (Hist1h2af)                                                                      | 0.08 |
| <i>Hist1h2ag</i> | NM_030225      | histone cluster 1, H2ag (Hist1h2ag)                                                                      | 0.26 |
| <i>Hist1h2ah</i> | NM_032418      | histone cluster 1, H2ah (Hist1h2ah)                                                                      | 0.13 |
| <i>Hist1h2ai</i> | NM_010060.2    | histone cluster 1, H2ai (Hist1h2ai)                                                                      | 0.08 |
| <i>Hist1h2ak</i> | XM_148071.1    | histone cluster 1, H2ak (Hist1h2ak)                                                                      | 0.15 |

|                  |                |                                                                                              |      |
|------------------|----------------|----------------------------------------------------------------------------------------------|------|
| <i>Hist1h2an</i> | NM_153527.2    | histone cluster 1, H2an (Hist1h2an)                                                          | 0.08 |
| <i>Hist1h2ao</i> | NM_178055.3    | histone cluster 1, H2ao (Hist1h2ao)                                                          | 0.09 |
| <i>Hist2h2ab</i> | NM_013760.3    | histone cluster 2, H2ab (Hist2h2ab)                                                          | 0.28 |
| <i>Hist2h2ac</i> | NM_001026211.1 | histone cluster 2, H2ac (Hist2h2ac)                                                          | 0.17 |
| <i>Hmga1</i>     | NM_009584.3    | high mobility group AT-hook 1 (Hmga1), transcript variant 1                                  | 0.36 |
| <i>Hmgb2</i>     | NM_138664.2    | high mobility group box 2 (Hmgb2)                                                            | 0.31 |
| <i>Hmgcl</i>     | NM_175223.2    | 3-hydroxy-3-methylglutaryl-Coenzyme A lyase (Hmgcl)                                          | 0.60 |
| <i>Hmgcr</i>     | NM_152915.1    | 3-hydroxy-3-methylglutaryl-Coenzyme A reductase (Hmgcr)                                      | 0.47 |
| <i>Hmgn2</i>     | NM_010066.3    | high mobility group nucleosomal binding domain 2 (Hmgn2)                                     | 0.62 |
| <i>Hn1</i>       | NM_001033420.2 | hematological and neurological expressed sequence 1 (Hn1)                                    | 0.49 |
| <i>Hn1l</i>      | XM_129913.4    | hematological and neurological expressed 1-like (Hn1l)                                       | 0.52 |
| <i>Hnrmpa2b1</i> | NM_015761.2    | heterogeneous nuclear ribonucleoprotein A2/B1 (Hnrmpa2b1), transcript variant 2              | 0.36 |
| <i>Hnrmpab</i>   | XM_130951.1    | heterogeneous nuclear ribonucleoprotein A/B (Hnrmpab), transcript variant 1                  | 0.41 |
| <i>Hnrmpf</i>    | NM_133803.1    | heterogeneous nuclear ribonucleoprotein F (Hnrmpf)                                           | 0.64 |
| <i>HnrmpH1</i>   | NM_024428.3    | heterogeneous nuclear ribonucleoprotein H1 (HnrmpH1)                                         | 0.50 |
| <i>Hnrmpk</i>    | NM_009468.3    | heterogeneous nuclear ribonucleoprotein K (Hnrmpk)                                           | 0.64 |
| <i>Hnrpa1</i>    | NM_011993.2    |                                                                                              | 0.24 |
| <i>Hnrpab</i>    | NM_023047.2    |                                                                                              | 0.64 |
| <i>HnrpdL</i>    | NM_007879.1    | heterogeneous nuclear ribonucleoprotein D-like (HnrpdL)                                      | 0.63 |
| <i>Hnrpl</i>     | NM_010078.2    | heterogeneous nuclear ribonucleoprotein L (Hnrpl)                                            | 0.51 |
| <i>Hnrpll</i>    | NM_019466.2    | heterogeneous nuclear ribonucleoprotein L-like (Hnrpll)                                      | 0.52 |
| <i>Hnrpm</i>     | NM_172442.2    | heterogeneous nuclear ribonucleoprotein M (Hnrpm)                                            | 0.60 |
| <i>Homer1</i>    | NM_023136      | homer homolog 1 (Drosophila) (Homer1), transcript variant d                                  | 0.53 |
| <i>Hpcal1</i>    | NM_013642.2    | hippocalcin-like 1 (Hpcal1)                                                                  | 0.51 |
| <i>Hprt1</i>     | NM_176933.4    | hypoxanthine guanine phosphoribosyl transferase 1 (Hprt1)                                    | 0.27 |
| <i>Hras1</i>     | NM_026268.2    |                                                                                              | 0.60 |
| <i>Hrmt1l2</i>   | NM_153459.2    |                                                                                              | 0.23 |
| <i>Hs2st1</i>    | NM_172256.1    | heparan sulfate 2-O-sulfotransferase 1 (Hs2st1)                                              | 0.62 |
| <i>Hs3st3b1</i>  | NM_019682.2    | heparan sulfate (glucosamine) 3-O-sulfotransferase 3B1 (Hs3st3b1)                            | 0.61 |
| <i>Hs6st2</i>    | NM_029297.1    | heparan sulfate 6-O-sulfotransferase 2 (Hs6st2), transcript variant 2                        | 0.55 |
| <i>Hsd17b12</i>  | NM_021469.2    | hydroxysteroid (17-beta) dehydrogenase 12 (Hsd17b12)                                         | 0.40 |
| <i>Hsd17b7</i>   | NM_175553      | hydroxysteroid (17-beta) dehydrogenase 7 (Hsd17b7)                                           | 0.60 |
| <i>Hsp90ab1</i>  | AK087162       | heat shock protein 90kDa alpha (cytosolic), class B member 1 (Hsp90ab1)                      | 0.51 |
| <i>Hsp90b1</i>   | NM_001081756.1 | heat shock protein 90, beta (Grp94), member 1 (Hsp90b1)                                      | 0.40 |
| <i>Hspa8</i>     | NM_001039556.2 | heat shock protein 8 (Hspa8)                                                                 | 0.63 |
| <i>Hspa9</i>     | NM_178791.4    | heat shock protein 9 (Hspa9)                                                                 | 0.60 |
| <i>Hspd1</i>     | XM_131404.3    | heat shock protein 1 (chaperonin) (Hspd1)                                                    | 0.36 |
| <i>Hspe1</i>     | NM_001015681.1 | heat shock protein 1 (chaperonin 10) (Hspe1)                                                 | 0.41 |
| <i>Hspg2</i>     | AK054036       |                                                                                              | 0.64 |
| <i>Htra1</i>     | NM_007891.3    | HtrA serine peptidase 1 (Htra1)                                                              | 0.66 |
| <i>Htra2</i>     | NM_177733.2    | HtrA serine peptidase 2 (Htra2), nuclear gene encoding mitochondrial protein                 | 0.65 |
| <i>Hyal2</i>     | NM_033270.1    | hyaluronoglucosaminidase 2 (Hyal2)                                                           | 0.50 |
| <i>Iars</i>      | NM_175528      | isoleucine-tRNA synthetase (Iars)                                                            | 0.47 |
| <i>Iars2</i>     | NM_173386.3    | isoleucine-tRNA synthetase 2, mitochondrial (Iars2)                                          | 0.65 |
| <i>Ibtk</i>      | NM_173749      |                                                                                              | 0.65 |
| <i>Ick</i>       | NM_178668.3    | intestinal cell kinase (Ick)                                                                 | 0.61 |
| <i>Ide</i>       | AK089103       | insulin degrading enzyme (Ide)                                                               | 0.59 |
| <i>Idh3a</i>     | AK089133       | isocitrate dehydrogenase 3 (NAD+) alpha (Idh3a), nuclear gene encoding mitochondrial protein | 0.46 |
| <i>Ier3</i>      | NM_026932.3    | immediate early response 3 (Ier3)                                                            | 0.18 |
| <i>Ier5l</i>     | NM_007898.2    | immediate early response 5-like (Ier5l)                                                      | 0.35 |
| <i>Igf2r</i>     | NM_199307.1    | insulin-like growth factor 2 receptor (Igf2r)                                                | 0.54 |
| <i>Igfbp2</i>    | NM_016772.1    | insulin-like growth factor binding protein 2 (Igfbp2)                                        | 0.06 |
| <i>Igfbp3</i>    | NM_026728.1    | insulin-like growth factor binding protein 3 (Igfbp3)                                        | 0.05 |
| <i>Igfbp4</i>    | NM_007899.1    | insulin-like growth factor binding protein 4 (Igfbp4)                                        | 0.08 |
| <i>Ilf2</i>      | NM_021519.1    | interleukin enhancer binding factor 2 (Ilf2)                                                 | 0.55 |
| <i>Ilvbl</i>     | NM_010332.2    | ilvB (bacterial acetolactate synthase)-like (Ilvbl)                                          | 0.63 |
| <i>Immt</i>      | NM_007904.3    | inner membrane protein, mitochondrial (Immt), nuclear gene encoding mitochondrial protein    | 0.43 |
| <i>Imp3</i>      | NM_010106.2    | IMP3, U3 small nucleolar ribonucleoprotein, homolog (yeast) (Imp3)                           | 0.45 |
| <i>Impa2</i>     | NM_018796.2    | inositol (myo)-1(or 4)-monophosphatase 2 (Impa2)                                             | 0.59 |
| <i>Impad1</i>    | NM_025380.2    | inositol monophosphatase domain containing 1 (Impad1)                                        | 0.47 |
| <i>Impdh2</i>    | NM_026007.4    |                                                                                              | 0.44 |
| <i>Incenp</i>    | NM_010110.2    | inner centromere protein (Incenp)                                                            | 0.37 |
| <i>Inpp5f</i>    | NM_010112.3    | inositol polyphosphate-5-phosphatase F (Inpp5f)                                              | 0.47 |
| <i>Insig1</i>    | XM_911906.3    | insulin induced gene 1 (Insig1)                                                              | 0.34 |
| <i>Ints7</i>     | NM_177689.3    | integrator complex subunit 7 (Ints7)                                                         | 0.64 |
| <i>Ipo4</i>      | XM_905111.2    | importin 4 (Ipo4)                                                                            | 0.62 |
| <i>Ipo5</i>      | XM_145024.8    | importin 5 (Ipo5)                                                                            | 0.46 |
| <i>Ipo9</i>      | NM_001018086.2 | importin 9 (Ipo9)                                                                            | 0.53 |

|                     |                |                                                                                                          |      |
|---------------------|----------------|----------------------------------------------------------------------------------------------------------|------|
| <i>Iqgap1</i>       | XM_921134.3    |                                                                                                          | 0.46 |
| <i>Iqgap3</i>       | XM_913807.2    | IQ motif containing GTPase activating protein 3 ( <i>Iqgap3</i> )                                        | 0.51 |
| <i>Isca1</i>        | XM_905000.3    | iron-sulfur cluster assembly 1 homolog ( <i>S. cerevisiae</i> ) ( <i>Isca1</i> )                         | 0.66 |
| <i>Isy1</i>         | XM_890293.3    | ISY1 splicing factor homolog ( <i>S. cerevisiae</i> ) ( <i>Isy1</i> )                                    | 0.54 |
| <i>Itgav</i>        | XM_484165.5    | integrin alpha V ( <i>Itgav</i> )                                                                        | 0.61 |
| <i>Itgb1</i>        | XM_484210.5    | integrin beta 1 (fibronectin receptor beta) ( <i>Itgb1</i> )                                             | 0.60 |
| <i>Itpr2</i>        | NM_001034882.2 | inositol 1,4,5-triphosphate receptor 2 ( <i>Itpr2</i> ), transcript variant 1                            | 0.39 |
| <i>Jagn1</i>        | XM_484670.5    | jagunal homolog 1 ( <i>Drosophila</i> ) ( <i>Jagn1</i> )                                                 | 0.62 |
| <i>Jam2</i>         | NM_001025388.1 | junction adhesion molecule 2 ( <i>Jam2</i> )                                                             | 0.62 |
| <i>Jmjd6</i>        | NM_001081233.1 | jumonji domain containing 6 ( <i>Jmjd6</i> )                                                             | 0.49 |
| <i>Josd2</i>        | XM_486222.5    | Josephin domain containing 2 ( <i>Josd2</i> )                                                            | 0.56 |
| <i>Jun</i>          | NR_002883.1    | Jun oncogene ( <i>Jun</i> )                                                                              | 0.60 |
| <i>Kars</i>         | NR_002889.2    | lysyl-tRNA synthetase ( <i>Kars</i> )                                                                    | 0.54 |
| <i>Kbtbd2</i>       | XM_620762.4    | kelch repeat and BTB (POZ) domain containing 2 ( <i>Kbtbd2</i> )                                         | 0.64 |
| <i>Kcnc1</i>        | XM_917756.3    | potassium voltage gated channel, Shaw-related subfamily, member 1 ( <i>Kcnc1</i> )                       | 0.33 |
| <i>Kcnc4</i>        | NM_001081297.1 | potassium voltage gated channel, Shaw-related subfamily, member 4 ( <i>Kcnc4</i> )                       | 0.38 |
| <i>Kcnip3</i>       | XM_888318.3    | Kv channel interacting protein 3, calsenilin ( <i>Kcnip3</i> )                                           | 0.42 |
| <i>Kcnk13</i>       | XM_889835.2    | potassium channel, subfamily K, member 13 ( <i>Kcnk13</i> )                                              | 0.66 |
| <i>Kctd12</i>       | NR_003363.1    | potassium channel tetramerisation domain containing 12 ( <i>Kctd12</i> )                                 | 0.44 |
| <i>Kctd20</i>       | XM_917009.3    | potassium channel tetramerisation domain containing 20 ( <i>Kctd20</i> )                                 | 0.63 |
| <i>Kdelc1</i>       | XM_908326.3    | KDEL (Lys-Asp-Glu-Leu) containing 1 ( <i>Kdelc1</i> )                                                    | 0.65 |
| <i>Kdelr2</i>       | XM_894495.2    | KDEL (Lys-Asp-Glu-Leu) endoplasmic reticulum protein retention receptor 2 ( <i>Kdelr2</i> )              | 0.43 |
| <i>Khdrbs1</i>      | XM_001473902.1 | KH domain containing, RNA binding, signal transduction associated 1 ( <i>Khdrbs1</i> )                   | 0.50 |
| <i>Kif11</i>        | XM_978542.1    | kinesin family member 11 ( <i>Kif11</i> )                                                                | 0.40 |
| <i>Kif15</i>        | XR_031485.1    | kinesin family member 15 ( <i>Kif15</i> )                                                                | 0.37 |
| <i>Kif18a</i>       | XM_917238.2    | kinesin family member 18A ( <i>Kif18a</i> )                                                              | 0.37 |
| <i>Kif20b</i>       | XM_912043.2    | kinesin family member 20B ( <i>Kif20b</i> )                                                              | 0.32 |
| <i>Kif22</i>        | NM_001081746.1 | kinesin family member 22 ( <i>Kif22</i> )                                                                | 0.16 |
| <i>Kif23</i>        | XM_984280.2    |                                                                                                          | 0.11 |
| <i>Kif2c</i>        | XM_984926.2    | kinesin family member 2C ( <i>Kif2c</i> )                                                                | 0.26 |
| <i>Kif3c</i>        | XR_002058.1    | kinesin family member 3C ( <i>Kif3c</i> )                                                                | 0.31 |
| <i>Kif4</i>         | XR_035278.1    | kinesin family member 4 ( <i>Kif4</i> )                                                                  | 0.31 |
| <i>Kifc1</i>        | NM_001081036.1 |                                                                                                          | 0.50 |
| <i>Kirrel3</i>      | XM_001005405.1 | kin of IRRE like 3 ( <i>Drosophila</i> ) ( <i>Kirrel3</i> )                                              | 0.44 |
| <i>Kitl</i>         | XR_002259.2    | kit ligand ( <i>Kitl</i> )                                                                               | 0.56 |
| <i>Klf6</i>         | NM_007913.5    | Kruppel-like factor 6 ( <i>Klf6</i> )                                                                    | 0.65 |
| <i>Klf7</i>         | NM_133838.4    |                                                                                                          | 0.62 |
| <i>Klhdc2</i>       | NM_010120.4    | kelch domain containing 2 ( <i>Klhdc2</i> )                                                              | 0.55 |
| <i>Kntc1</i>        | NM_027236.2    | kinetochore associated 1 ( <i>Kntc1</i> )                                                                | 0.38 |
| <i>Kpna1</i>        | XM_131572.4    | karyopherin (importin) alpha 1 ( <i>Kpna1</i> )                                                          | 0.64 |
| <i>Kpna2</i>        | NM_026030.2    | karyopherin (importin) alpha 2 ( <i>Kpna2</i> )                                                          | 0.56 |
| <i>Kpnb1</i>        | NM_012010.3    | karyopherin (importin) beta 1 ( <i>Kpnb1</i> )                                                           | 0.53 |
| <i>Kras</i>         | NM_010123.3    | v-Ki-ras2 Kirsten rat sarcoma viral oncogene homolog ( <i>Kras</i> )                                     | 0.65 |
| <i>Krtcap2</i>      | NM_133916.2    | keratinocyte associated protein 2 ( <i>Krtcap2</i> )                                                     | 0.53 |
| <i>Lama5</i>        | NM_018749.2    | laminin, alpha 5 ( <i>Lama5</i> )                                                                        | 0.43 |
| <i>Lamc1</i>        | NM_145139.2    | laminin, gamma 1 ( <i>Lamc1</i> )                                                                        | 0.59 |
| <i>Lass2</i>        | NM_025344.1    | LAG1 homolog, ceramide synthase 2 ( <i>Lass2</i> )                                                       | 0.54 |
| <i>Lass5</i>        | NM_016876.3    | LAG1 homolog, ceramide synthase 5 ( <i>Lass5</i> )                                                       | 0.59 |
| <i>Lbh</i>          | NM_018799.1    | limb-bud and heart ( <i>Lbh</i> )                                                                        | 0.38 |
| <i>Lbr</i>          | NM_028659.2    |                                                                                                          | 0.23 |
| <i>Ldha</i>         | NM_016876.2    | lactate dehydrogenase A ( <i>Ldha</i> )                                                                  | 0.33 |
| <i>Leo1</i>         | NM_025344      | Leo1, Paf1/RNA polymerase II complex component, homolog ( <i>S. cerevisiae</i> ) ( <i>Leo1</i> )         | 0.58 |
| <i>Lgals1</i>       | NM_144958.2    |                                                                                                          | 0.17 |
| <i>Lig1</i>         | NM_138669.1    | ligase I, DNA, ATP-dependent ( <i>Lig1</i> ), transcript variant 2                                       | 0.27 |
| <i>Lig3</i>         | NM_007918.3    |                                                                                                          | 0.60 |
| <i>Limd1</i>        | NM_023314.2    | LIM domains containing 1 ( <i>Limd1</i> )                                                                | 0.61 |
| <i>Lin54</i>        | NM_001005331.1 | lin-54 homolog ( <i>C. elegans</i> ) ( <i>Lin54</i> )                                                    | 0.49 |
| <i>Lip1</i>         | NM_173363.4    |                                                                                                          | 0.52 |
| <i>Liph</i>         | NM_181582.3    | lipase, member H ( <i>Liph</i> ), transcript variant 2                                                   | 0.58 |
| <i>Litaf</i>        | NM_010579.2    | LPS-induced TN factor ( <i>Litaf</i> )                                                                   | 0.36 |
| <i>Lman1</i>        | NM_010485.3    | lectin, mannose-binding, 1 ( <i>Lman1</i> )                                                              | 0.59 |
| <i>Lmnb1</i>        | NM_205536.1    | lamin B1 ( <i>Lmnb1</i> )                                                                                | 0.15 |
| <i>Lmo2</i>         | NM_198093.2    | LIM domain only 2 ( <i>Lmo2</i> )                                                                        | 0.32 |
| <i>LOC100039346</i> | NM_019422.2    | PREDICTED: hypothetical protein LOC100039346 ( <i>LOC100039346</i> )                                     | 0.33 |
| <i>LOC100039532</i> | NM_148941.1    | PREDICTED: similar to ribosomal protein L35a ( <i>LOC100039532</i> )                                     | 0.52 |
| <i>LOC100039571</i> | NM_134255.2    | PREDICTED: similar to ribosomal protein L23a ( <i>LOC100039571</i> )                                     | 0.35 |
| <i>LOC100039751</i> | NM_130450.2    | PREDICTED: similar to 40S ribosomal protein S12 ( <i>LOC100039751</i> ), misc RNA.                       | 0.37 |
| <i>LOC100039786</i> | NM_013536.1    | PREDICTED: similar to Ywhaq protein ( <i>LOC100039786</i> )                                              | 0.58 |
| <i>LOC100040573</i> | NM_007929.2    | PREDICTED: similar to putative transcription factor ZNF131, transcript variant 1 ( <i>LOC100040573</i> ) | 0.59 |



|              |                |                                                                                                                                                         |      |
|--------------|----------------|---------------------------------------------------------------------------------------------------------------------------------------------------------|------|
| LOC100040592 | NM_028013.2    | PREDICTED: similar to Hmgcs1 protein, transcript variant 1 (LOC100040592)                                                                               | 0.38 |
| LOC100040605 | NM_023119.1    | PREDICTED: similar to ribosomal protein L13 (LOC100040605)                                                                                              | 0.44 |
| LOC100041500 | NM_032003.1    | PREDICTED: similar to LSM7 homolog, U6 small nuclear RNA associated (LOC100041500)                                                                      | 0.58 |
| LOC100041835 | NM_009849.1    | PREDICTED: similar to H+ ATP synthase (LOC100041835)                                                                                                    | 0.41 |
| LOC100041864 | NM_026174.2    | PREDICTED: similar to Rpl11 protein (LOC100041864)                                                                                                      | 0.55 |
| LOC100042405 | NM_001026214.1 | PREDICTED: similar to high mobility group nucleosomal binding domain 2 (LOC100042405)                                                                   | 0.45 |
| LOC100042427 | NM_173447.2    | PREDICTED: similar to Glyceraldehyde-3-phosphate dehydrogenase (GAPDH), transcript variant 4 (LOC100042427)                                             | 0.39 |
| LOC100042777 | NM_007940.3    | PREDICTED: similar to human protein homologous to DROER protein (LOC100042777)                                                                          | 0.65 |
| LOC100042970 | NM_010148      | PREDICTED: similar to Kifc1 protein (LOC100042970)                                                                                                      | 0.42 |
| LOC100043192 | NM_007948.1    | PREDICTED: similar to ribosomal protein L31 (LOC100043192)                                                                                              | 0.50 |
| LOC100043209 | NM_026170.3    | PREDICTED: similar to ribosomal protein L15 (LOC100043209)                                                                                              | 0.54 |
| LOC100043257 | NM_026168.3    | PREDICTED: similar to RNA binding motif protein 3 (LOC100043257)                                                                                        | 0.48 |
| LOC100043391 | NM_007951.1    | PREDICTED: similar to QM protein (LOC100043391)                                                                                                         | 0.48 |
| LOC100043527 | NM_145502.2    | PREDICTED: similar to ribosomal protein S28 (LOC100043527)                                                                                              | 0.49 |
| LOC100043555 | NM_001081213.1 | PREDICTED: similar to Aak1 protein (LOC100043555)                                                                                                       | 0.52 |
| LOC100043671 | NM_026129.2    | PREDICTED: hypothetical protein LOC100043671 (LOC100043671)                                                                                             | 0.51 |
| LOC100043675 | NM_133753.1    | PREDICTED: similar to Translocase of inner mitochondrial membrane 23 homolog (yeast) (LOC100043675)                                                     | 0.54 |
| LOC100043796 | NM_028039.1    | PREDICTED: similar to macrophage migration inhibitory factor, transcript variant 1 (LOC100043796)                                                       | 0.53 |
| LOC100043822 | NM_001014976.1 | PREDICTED: hypothetical protein LOC100043822 (LOC100043822)                                                                                             | 0.63 |
| LOC100043906 | NM_007953.2    | PREDICTED: similar to nuclear pore-targeting complex component of 58 kDa, transcript variant 1 (LOC100043906)                                           | 0.36 |
| LOC100044322 | NM_011934.3    | PREDICTED: similar to UDP-glucose ceramide glucosyltransferase-like 1 (LOC100044322)                                                                    | 0.49 |
| LOC100044468 | NM_144866.3    | PREDICTED: similar to nemo-like kinase (LOC100044468)                                                                                                   | 0.58 |
| LOC100044475 | NM_001038642.1 | PREDICTED: similar to SH2/SH3 adaptor protein (LOC100044475)                                                                                            | 0.66 |
| LOC100044696 | NM_011809.2    | PREDICTED: similar to cysteine-rich PAK1inhibitor (LOC100044696)                                                                                        | 0.53 |
| LOC100044829 | NM_007960.3    | PREDICTED: similar to Fibrillarin, transcript variant 1 (LOC100044829)                                                                                  | 0.35 |
| LOC100044948 | NM_008815.2    | PREDICTED: similar to macrophage migration inhibitory factor (LOC100044948)                                                                             | 0.45 |
| LOC100045040 | NM_023794.2    | PREDICTED: similar to ING1 protein (LOC100045040), misc RNA.                                                                                            | 0.66 |
| LOC100045300 | NM_025644.3    | PREDICTED: similar to Dr1 associated protein 1 (negative cofactor 2 alpha) (LOC100045300)                                                               | 0.61 |
| LOC100045312 | NM_144886.1    | PREDICTED: similar to ribosomal protein (LOC100045312)                                                                                                  | 0.35 |
| LOC100045343 | NM_028274.2    | PREDICTED: similar to CDNA sequence BC046404 (LOC100045343), misc RNA.                                                                                  | 0.64 |
| LOC100045542 | NM_001081188.1 | PREDICTED: similar to FERMRhoGEF (Arhgef) and pleckstrin domain protein 1 (LOC100045542)                                                                | 0.63 |
| LOC100045668 | NM_027148.2    | PREDICTED: similar to Rpl17 protein (LOC100045668)                                                                                                      | 0.49 |
| LOC100045677 | NM_010162.2    | PREDICTED: similar to DNA replication licensing factor MCM3 (DNA polymerase alpha holoenzyme-associated protein P1) (P1-MCM3) (LOC100045677), misc RNA. | 0.49 |
| LOC100045697 | NM_018788.2    | PREDICTED: similar to ornithine decarboxylase antizyme (LOC100045697), misc RNA.                                                                        | 0.65 |
| LOC100045737 | NM_007971.1    | PREDICTED: hypothetical protein LOC100045737 (LOC100045737), misc RNA.                                                                                  | 0.62 |
| LOC100045780 | NM_010169.3    | PREDICTED: similar to metalloprotease-disintegrin meltrin beta (LOC100045780)                                                                           | 0.18 |
| LOC100045887 | NM_198605.1    | PREDICTED: similar to PTB-associated splicing factor (LOC100045887)                                                                                     | 0.51 |
| LOC100045967 | AK089303       | PREDICTED: hypothetical protein LOC100045967 (LOC100045967), misc RNA.                                                                                  | 0.34 |
| LOC100045981 | AK089567       | PREDICTED: similar to synaptotagmin XI (LOC100045981)                                                                                                   | 0.65 |
| LOC100045999 | NM_010173.3    | PREDICTED: similar to RAN, member RAS oncogene family (LOC100045999)                                                                                    | 0.42 |
| LOC100046039 | NM_010634.2    | PREDICTED: similar to histone deacetylase HD1 (LOC100046039)                                                                                            | 0.64 |
| LOC100046343 | NM_021272.2    | PREDICTED: similar to CCR4-NOT transcription complex, subunit 6 (LOC100046343)                                                                          | 0.49 |
| LOC100046650 | NM_021890.3    | PREDICTED: similar to PRELI domain containing 1 (LOC100046650)                                                                                          | 0.53 |
| LOC100046744 | NM_007983.2    | PREDICTED: similar to Serine/arginine repetitive matrix protein 2 (LOC100046744)                                                                        | 0.59 |
| LOC100046853 | NM_010176.2    | PREDICTED: similar to heterogeneous nuclear ribonucleoprotein K (LOC100046853)                                                                          | 0.26 |
| LOC100046855 | NM_023480.2    | PREDICTED: similar to BKLF (LOC100046855)                                                                                                               | 0.44 |
| LOC100046895 | NM_028443.2    | PREDICTED: similar to Quaking protein (LOC100046895)                                                                                                    | 0.66 |
| LOC100047155 | NM_153560.4    | PREDICTED: similar to Small nuclear ribonucleoprotein polypeptide A (LOC100047155)                                                                      | 0.44 |
| LOC100047167 | NM_145421.1    | PREDICTED: similar to mKIAA0990 protein (LOC100047167)                                                                                                  | 0.36 |
| LOC100047184 | NM_028666.2    | PREDICTED: similar to proteasome alpha7/C8 subunit (LOC100047184)                                                                                       | 0.65 |

|              |                |                                                                                                                                       |      |
|--------------|----------------|---------------------------------------------------------------------------------------------------------------------------------------|------|
| LOC100047261 | NM_001033268.2 | PREDICTED: similar to spermidine/spermine N1-acetyltransferase (LOC100047261), misc RNA.                                              | 0.63 |
| LOC100047268 | NM_028617.2    | PREDICTED: similar to Immediate early response 5-like (LOC100047268)                                                                  | 0.26 |
| LOC100047353 | NM_133778.2    | PREDICTED: similar to myocardial vascular inhibition factor (LOC100047353)                                                            | 0.63 |
| LOC100047579 | NM_025459.2    | PREDICTED: similar to transmembrane protein 20 (LOC100047579)                                                                         | 0.66 |
| LOC100047615 | NM_001081161.1 | PREDICTED: similar to 40S ribosomal protein S17 (LOC100047615), misc RNA.                                                             | 0.57 |
| LOC100047619 | NM_145410.3    | PREDICTED: similar to solute carrier family 7 (cationic amino acid transporter, y+ system), member 5 (LOC100047619), misc RNA.        | 0.32 |
| LOC100047634 | NM_001081428.1 | PREDICTED: similar to Eukaryotic translation initiation factor 2 alpha kinase 3 (LOC100047634), misc RNA.                             | 0.63 |
| LOC100047651 | NM_153782.1    | PREDICTED: similar to FOG (LOC100047651)                                                                                              | 0.56 |
| LOC100047712 | NM_029007.2    | PREDICTED: similar to coiled-coil domain containing 101 (LOC100047712)                                                                | 0.63 |
| LOC100047759 | NM_001033244.2 | PREDICTED: similar to acidic ribosomal phosphoprotein P1, transcript variant 1 (LOC100047759)                                         | 0.43 |
| LOC100047762 | XM_986338.2    | PREDICTED: similar to Aspartate aminotransferase, cytoplasmic (Transaminase A) (Glutamate oxaloacetate transaminase 1) (LOC100047762) | 0.59 |
| LOC100047827 | NM_025850.2    | PREDICTED: similar to Hmgn2 protein (LOC100047827)                                                                                    | 0.42 |
| LOC100047888 | NM_011811.2    | PREDICTED: similar to Neurocan (LOC100047888)                                                                                         | 0.42 |
| LOC100047934 | NM_007987.1    | PREDICTED: hypothetical protein LOC100047934 (LOC100047934)                                                                           | 0.45 |
| LOC100047935 | NM_023229.2    | PREDICTED: similar to ribosomal protein L5 (LOC100047935), misc RNA.                                                                  | 0.52 |
| LOC100047998 | NM_133754.3    | PREDICTED: similar to ribosomal protein L37a (LOC100047998)                                                                           | 0.43 |
| LOC100048187 | NM_010180.1    | PREDICTED: similar to ribosomal protein S27 (metallopanstimulin 1) (LOC100048187)                                                     | 0.59 |
| LOC100048413 | NM_001081437.1 | PREDICTED: similar to Myeloid leukemia factor 2 (LOC100048413)                                                                        | 0.56 |
| LOC100048445 | NM_007993      | PREDICTED: similar to fau (LOC100048445)                                                                                              | 0.50 |
| LOC100048480 | NM_001005866.1 | PREDICTED: similar to ubiquinol-cytochrome c reductase binding protein (LOC100048480)                                                 | 0.59 |
| LOC100048483 | NM_133940.1    | PREDICTED: similar to cytochrome c oxidase subunit VIII (LOC100048483)                                                                | 0.43 |
| LOC100048508 | NM_172988.1    | PREDICTED: similar to Rpl36 protein, transcript variant 1 (LOC100048508)                                                              | 0.43 |
| LOC100048613 | NM_176848.1    | PREDICTED: similar to cytochrome c oxidase, subunit VIIc, transcript variant 1 (LOC100048613)                                         | 0.47 |
| LOC100048645 | NM_145564.3    | PREDICTED: similar to cysteine and glycine-rich protein 2 binding protein (LOC100048645)                                              | 0.59 |
| LOC100048803 | NM_025785.2    | PREDICTED: hypothetical protein LOC100048803 (LOC100048803)                                                                           | 0.54 |
| LOC212399    | NM_026346.1    |                                                                                                                                       | 0.39 |
| LOC216443    | NM_025386.2    |                                                                                                                                       | 0.59 |
| LOC219049    | NM_001001160.2 |                                                                                                                                       | 0.50 |
| LOC219106    | NM_173401.2    |                                                                                                                                       | 0.57 |
| LOC219145    | NM_023605.2    |                                                                                                                                       | 0.40 |
| LOC225058    | NM_010189.1    |                                                                                                                                       | 0.47 |
| LOC225134    | NM_199012.1    | PREDICTED: similar to ribosomal protein S4, X-linked (LOC225134), misc RNA.                                                           | 0.42 |
| LOC226416    | NM_139309      |                                                                                                                                       | 0.47 |
| LOC229810    | NM_134469.3    |                                                                                                                                       | 0.63 |
| LOC230253    | NM_007999.3    |                                                                                                                                       | 0.25 |
| LOC230896    | XM_001480162.1 |                                                                                                                                       | 0.55 |
| LOC231368    | NM_183171.1    | PREDICTED: similar to 60S acidic ribosomal protein P0 (L10E) (LOC231368)                                                              | 0.40 |
| LOC232606    | NM_199448.1    |                                                                                                                                       | 0.59 |
| LOC232887    | NM_010197.3    |                                                                                                                                       | 0.60 |
| LOC232890    | NM_023304.1    |                                                                                                                                       | 0.47 |
| LOC236831    | NM_026218.2    | PREDICTED: similar to 60S ribosomal protein L7a (LOC236831)                                                                           | 0.43 |
| LOC237512    | NM_010209.1    |                                                                                                                                       | 0.40 |
| LOC237877    | NM_001077361.1 |                                                                                                                                       | 0.60 |
| LOC238943    | NM_021438.2    |                                                                                                                                       | 0.62 |
| LOC241621    | NM_021891.2    | PREDICTED: similar to ribosomal protein L27a-like (LOC241621)                                                                         | 0.29 |
| LOC245668    | NM_024169.3    |                                                                                                                                       | 0.45 |
| LOC245892    | NM_008019.2    |                                                                                                                                       | 0.16 |
| LOC268569    | NM_008020.2    |                                                                                                                                       | 0.20 |
| LOC268700    | NM_010219.3    |                                                                                                                                       | 0.39 |
| LOC269251    | NM_010220.2    |                                                                                                                                       | 0.33 |
| LOC270037    | NM_201518.1    |                                                                                                                                       | 0.33 |
| LOC271490    | NM_019445.1    |                                                                                                                                       | 0.49 |
| LOC271505    | NM_172409.2    |                                                                                                                                       | 0.54 |
| LOC272681    | NM_022014.2    |                                                                                                                                       | 0.48 |
| LOC277856    | NM_173182.1    |                                                                                                                                       | 0.56 |
| LOC280205    | NM_010234.2    |                                                                                                                                       | 0.56 |
| LOC329076    | NM_008240.2    |                                                                                                                                       | 0.41 |
| LOC329750    | NM_001080932.1 |                                                                                                                                       | 0.55 |
| LOC331102    | NM_008021.4    |                                                                                                                                       | 0.51 |
| LOC331507    | NM_054039.1    |                                                                                                                                       | 0.63 |
| LOC380692    | NM_172291.1    |                                                                                                                                       | 0.26 |

|           |                |                                                                                                                                                   |      |
|-----------|----------------|---------------------------------------------------------------------------------------------------------------------------------------------------|------|
| LOC380707 | NM_010236.1    |                                                                                                                                                   | 0.55 |
| LOC380927 | NM_172475      |                                                                                                                                                   | 0.57 |
| LOC380930 | NM_007984.2    |                                                                                                                                                   | 0.48 |
| LOC381046 | NM_008047.4    |                                                                                                                                                   | 0.37 |
| LOC381114 | NM_010240.1    |                                                                                                                                                   | 0.27 |
| LOC381140 | NM_057172.1    |                                                                                                                                                   | 0.50 |
| LOC381215 | NM_139149.1    |                                                                                                                                                   | 0.49 |
| LOC381230 | NM_016893.2    |                                                                                                                                                   | 0.54 |
| LOC381330 | NM_019502.2    |                                                                                                                                                   | 0.42 |
| LOC381365 | NM_008044.1    |                                                                                                                                                   | 0.38 |
| LOC381398 | AF124385       |                                                                                                                                                   | 0.37 |
| LOC381448 | NM_011814.2    |                                                                                                                                                   | 0.36 |
| LOC381561 | NM_148925.1    |                                                                                                                                                   | 0.49 |
| LOC381649 | NM_008054.1    |                                                                                                                                                   | 0.46 |
| LOC381799 | NM_021457.2    |                                                                                                                                                   | 0.64 |
| LOC381808 | NM_008056      |                                                                                                                                                   | 0.58 |
| LOC381891 | NM_019757.1    |                                                                                                                                                   | 0.60 |
| LOC381940 | NM_013716.2    |                                                                                                                                                   | 0.65 |
| LOC381999 | NM_011816.3    |                                                                                                                                                   | 0.44 |
| LOC382061 | NM_008064.2    |                                                                                                                                                   | 0.43 |
| LOC382230 | NM_021356.2    |                                                                                                                                                   | 0.52 |
| LOC382885 | NM_020590.4    |                                                                                                                                                   | 0.51 |
| LOC383010 | NM_008069.4    |                                                                                                                                                   | 0.63 |
| LOC383099 | NM_008077.4    |                                                                                                                                                   | 0.53 |
| LOC383308 | NM_007836.1    |                                                                                                                                                   | 0.34 |
| LOC383330 | NM_013814.2    |                                                                                                                                                   | 0.62 |
| LOC383897 | NM_134189.2    |                                                                                                                                                   | 0.54 |
| LOC383942 | NM_139272.2    |                                                                                                                                                   | 0.64 |
| LOC384104 | NM_001081421.1 |                                                                                                                                                   | 0.52 |
| LOC384206 | NM_008060.1    |                                                                                                                                                   | 0.58 |
| LOC384727 | NM_172672.2    |                                                                                                                                                   | 0.55 |
| LOC385699 | NM_008083.2    |                                                                                                                                                   | 0.62 |
| LOC385905 | NM_008084.2    | PREDICTED: similar to proteasome alpha7/C8 subunit (LOC385905), misc RNA                                                                          | 0.58 |
| LOC433476 | NM_178888.4    | PREDICTED: similar to ribosomal protein L27a (LOC433476)                                                                                          | 0.28 |
| LOC433546 | NM_180678.3    | PREDICTED: similar to 60S ribosomal protein L9 (LOC433546)                                                                                        | 0.59 |
| LOC433745 | NM_010256.2    | PREDICTED: similar to ribosomal protein L3 (LOC433745)                                                                                            | 0.50 |
| LOC433749 | NM_001079876.1 | PREDICTED: similar to Rho family GTPase RhoA (LOC433749)                                                                                          | 0.66 |
| LOC433943 | NM_008088.1    | PREDICTED: similar to Glutathione S-transferase Mu 1 (GST class-mu 1) (Glutathione S-transferase GT8.7) (pmGT10) (GST 1-1) (LOC433943), misc RNA. | 0.66 |
| LOC433955 | NM_026033.1    | PREDICTED: similar to HSPC008 (LOC433955), misc RNA.                                                                                              | 0.64 |
| LOC545056 | XM_289726.2    | ubiquitin-conjugating enzyme E2, J2 homolog pseudogene (LOC545056) on chromosome 14.                                                              | 0.53 |
| LOC545369 | NM_010260.1    | PREDICTED: similar to ribosomal protein L4 (LOC545369), misc RNA.                                                                                 | 0.60 |
| LOC545472 | NM_145523.3    | PREDICTED: similar to BTB (POZ) domain containing 1 (LOC545472)                                                                                   | 0.60 |
| LOC546015 | NM_028407.3    | PREDICTED: similar to ribosomal protein S9 (LOC546015), misc RNA.                                                                                 | 0.65 |
| LOC620678 |                | PREDICTED: similar to 60S ribosomal protein L7 (LOC620678), misc RNA.                                                                             | 0.53 |
| LOC622655 | NM_013847      | PREDICTED: similar to hCG31107 (LOC622655), misc RNA.                                                                                             | 0.34 |
| LOC622994 | NM_133219.1    | PREDICTED: hypothetical LOC622994 (LOC622994), misc RNA.                                                                                          | 0.45 |
| LOC623006 | NM_020619.2    | PREDICTED: similar to retinoblastoma-binding protein mRbAp46 (LOC623006), misc RNA.                                                               | 0.58 |
| LOC623466 | NM_144891.1    | PREDICTED: similar to MGC27348 protein (LOC623466), misc RNA.                                                                                     | 0.42 |
| LOC623568 | NM_011819.1    | PREDICTED: similar to ribosomal protein S20 (LOC623568)                                                                                           | 0.41 |
| LOC624662 | NM_025638.1    | PREDICTED: similar to MGC69457 protein (LOC624662), misc RNA.                                                                                     | 0.65 |
| LOC630729 | NM_023608.2    | PREDICTED: similar to glutathione reductase 1 (LOC630729)                                                                                         | 0.57 |
| LOC630936 | NM_177367.2    | PREDICTED: similar to nuclease sensitive element binding protein 1 (LOC630936), misc RNA.                                                         | 0.31 |
| LOC632022 | NM_010277      | PREDICTED: similar to 40S ribosomal protein S18 (LOC632022), misc RNA.                                                                            | 0.55 |
| LOC632230 | NM_138591.1    | PREDICTED: similar to Ribosomal protein L5 (LOC632230), misc RNA.                                                                                 | 0.46 |
| LOC632667 | NM_028758.2    | PREDICTED: similar to PNG protein (LOC632667)                                                                                                     | 0.39 |
| LOC632684 | NM_027544.1    | PREDICTED: hypothetical LOC632684 (LOC632684), misc RNA.                                                                                          | 0.58 |
| LOC633016 | NM_178856.1    | PREDICTED: similar to Chromobox homolog 3 (HP1 gamma homolog, Drosophila), transcript variant 2 (LOC633016)                                       | 0.54 |
| LOC634015 | NM_018771.3    | PREDICTED: similar to Proteasome subunit beta type 3 (Proteasome theta chain) (Proteasome chain 13) (Proteasome component C10-II) (LOC634015)     | 0.64 |
| LOC635470 | NM_010288.2    | PREDICTED: similar to ribosomal protein L27a-like (LOC635470)                                                                                     | 0.33 |
| LOC638892 | NM_009752.1    | PREDICTED: similar to cpn10 protein (LOC638892)                                                                                                   | 0.52 |
| LOC639931 |                | PREDICTED: similar to zinc RING finger protein SAG (LOC639931)                                                                                    | 0.57 |
| LOC640739 | NM_009149      | PREDICTED: hypothetical LOC640739 (LOC640739)                                                                                                     | 0.16 |

|                  |                |                                                                                                                                  |      |
|------------------|----------------|----------------------------------------------------------------------------------------------------------------------------------|------|
| <i>LOC654426</i> | NM_027450      | ATP synthase, H+ transporting, mitochondrial F0 complex, subunit F pseudogene ( <i>LOC654426</i> ), non-coding RNA.              | 0.53 |
| <i>LOC654467</i> | NM_053108      | heterogeneous nuclear ribonucleoprotein A1 pseudogene ( <i>LOC654467</i> ) on chromosome 9.                                      | 0.34 |
| <i>LOC654842</i> | NM_001038592.1 | hypothetical protein <i>LOC654842</i> ( <i>LOC654842</i> )                                                                       | 0.41 |
| <i>LOC664894</i> | NM_023140.4    | PREDICTED: similar to fusion protein: ubiquitin (bases 43_513); ribosomal protein S27a (bases 217_532) ( <i>LOC664894</i> )      | 0.63 |
| <i>LOC665032</i> | NM_028419.2    | PREDICTED: similar to ribosomal protein ( <i>LOC665032</i> )                                                                     | 0.50 |
| <i>LOC665235</i> | NM_146211.2    | PREDICTED: similar to hCG1642689 ( <i>LOC665235</i> ), misc RNA.                                                                 | 0.36 |
| <i>LOC665237</i> | NM_008133.2    | PREDICTED: similar to hCG31107 ( <i>LOC665237</i> ), misc RNA.                                                                   | 0.29 |
| <i>LOC665281</i> | NM_008134.2    | PREDICTED: similar to 40S ribosomal protein S12 ( <i>LOC665281</i> ), misc RNA.                                                  | 0.36 |
| <i>LOC666559</i> | XM_144253.6    | PREDICTED: similar to farnesyl pyrophosphate synthase ( <i>LOC666559</i> ), misc RNA                                             | 0.20 |
| <i>LOC666676</i> | NM_001033297.2 | PREDICTED: similar to ADP-ribosylation factor ( <i>LOC666676</i> ), misc RNA.                                                    | 0.46 |
| <i>LOC667005</i> | NM_001013771.2 | PREDICTED: similar to cyclin B1 ( <i>LOC667005</i> ), misc RNA.                                                                  | 0.43 |
| <i>LOC667251</i> | NM_146041.2    | PREDICTED: similar to NADPH cytochrome B5 oxidoreductase ( <i>LOC667251</i> ), misc RNA.                                         | 0.64 |
| <i>LOC668038</i> | NM_025508.3    | PREDICTED: similar to ribosomal protein ( <i>LOC668038</i> ), misc RNA.                                                          | 0.39 |
| <i>LOC668239</i> | NM_177992.2    | PREDICTED: similar to Rps13 protein ( <i>LOC668239</i> )                                                                         | 0.42 |
| <i>LOC668387</i> | NM_001033300.2 | PREDICTED: similar to ribosomal protein S6 ( <i>LOC668387</i> ), misc RNA.                                                       | 0.48 |
| <i>LOC668492</i> | NM_010301.1    | PREDICTED: similar to zinc finger CCHC-type and RNA binding motif 1 ( <i>LOC668492</i> ), misc RNA.                              | 0.58 |
| <i>LOC668573</i> | NM_010305.1    | PREDICTED: similar to ribosomal protein ( <i>LOC668573</i> ), misc RNA.                                                          | 0.42 |
| <i>LOC668706</i> | NM_010308.3    | PREDICTED: similar to Ribosomal protein L12 ( <i>LOC668706</i> )                                                                 | 0.32 |
| <i>LOC669658</i> | NM_008139.5    | PREDICTED: similar to melanoma antigen ( <i>LOC669658</i> )                                                                      | 0.67 |
| <i>LOC671523</i> | NM_008142.3    | PREDICTED: similar to ring finger and WD repeat domain 3 ( <i>LOC671523</i> )                                                    | 0.66 |
| <i>LOC671641</i> | NM_013531.3    | PREDICTED: similar to ribosomal protein S12 ( <i>LOC671641</i> )                                                                 | 0.44 |
| <i>LOC671878</i> | NM_015828      | PREDICTED: similar to spermine synthase ( <i>LOC671878</i> )                                                                     | 0.44 |
| <i>LOC672474</i> | AK005561       | PREDICTED: similar to 60S ribosomal protein L29 ( <i>LOC672474</i> )                                                             | 0.55 |
| <i>LOC674611</i> | NM_001038637.1 | PREDICTED: similar to Su48, transcript variant 3 ( <i>LOC674611</i> )                                                            | 0.33 |
| <i>LOC675377</i> | NM_178846.2    | PREDICTED: similar to Ribosomal protein L8 ( <i>LOC675377</i> ), misc RNA.                                                       | 0.47 |
| <i>LOC675440</i> | NM_011937.1    | PREDICTED: similar to SMT3 suppressor of mif two 3 homolog 2 ( <i>S. cerevisiae</i> ), transcript variant 1 ( <i>LOC675440</i> ) | 0.51 |
| <i>LOC675813</i> | NM_008146.3    | PREDICTED: similar to ribosomal protein S20 ( <i>LOC675813</i> ), misc RNA.                                                      | 0.63 |
| <i>LOC675899</i> | NM_175193.5    | PREDICTED: similar to H2A histone family, member Z ( <i>LOC675899</i> )                                                          | 0.22 |
| <i>LOC676640</i> | NM_001035122.2 | PREDICTED: similar to neuron navigator 3, transcript variant 5 ( <i>LOC676640</i> )                                              | 0.43 |
| <i>LOC676724</i> | NM_027352.3    | PREDICTED: hypothetical <i>LOC676724</i> ( <i>LOC676724</i> )                                                                    | 0.41 |
| <i>LOC676974</i> | NM_029674.1    | PREDICTED: similar to Glucose phosphate isomerase 1, transcript variant 2 ( <i>LOC676974</i> )                                   | 0.57 |
| <i>LOC677205</i> | NM_010325.2    | PREDICTED: similar to DEAD (Asp-Glu-Ala-Asp) box polypeptide 18 ( <i>LOC677205</i> ), misc RNA.                                  | 0.57 |
| <i>LOC677213</i> | NM_008149.3    | PREDICTED: similar to U2AF homology motif (UHM) kinase 1 ( <i>LOC677213</i> )                                                    | 0.66 |
| <i>LOC677215</i> | NM_010271.2    | PREDICTED: similar to acidic ribosomal phosphoprotein P1, transcript variant 1 ( <i>LOC677215</i> )                              | 0.58 |
| <i>LOC677317</i> | NM_010274.2    | PREDICTED: similar to Mod1 protein, transcript variant 4 ( <i>LOC677317</i> )                                                    | 0.50 |
| <i>LOC677448</i> | NM_008155.2    | PREDICTED: similar to actin ( <i>LOC677448</i> ), misc RNA.                                                                      | 0.55 |
| <i>LOC677551</i> | NM_008156.2    | PREDICTED: similar to Ribosomal protein L19 ( <i>LOC677551</i> ), misc RNA.                                                      | 0.62 |
| <i>Lor</i>       | AK020224       | loricrin ( <i>Lor</i> )                                                                                                          | 0.33 |
| <i>Lpl</i>       | NM_053110.3    | lipoprotein lipase ( <i>Lpl</i> )                                                                                                | 0.56 |
| <i>Lrig1</i>     | NM_177469.3    | leucine-rich repeats and immunoglobulin-like domains 1 ( <i>Lrig1</i> )                                                          | 0.51 |
| <i>Lrp12</i>     | NR_003568.1    | low density lipoprotein-related protein 12 ( <i>Lrp12</i> )                                                                      | 0.62 |
| <i>Lrrc59</i>    | NM_013533.3    | leucine rich repeat containing 59 ( <i>Lrrc59</i> )                                                                              | 0.39 |
| <i>Lrrfp1</i>    | NM_001025381.1 | leucine rich repeat (in FLII) interacting protein 1 ( <i>Lrrfp1</i> )                                                            | 0.32 |
| <i>Lsg1</i>      | NM_175271.2    | large subunit GTPase 1 homolog ( <i>S. cerevisiae</i> ) ( <i>Lsg1</i> )                                                          | 0.67 |
| <i>Lsm1</i>      | NM_134438.1    | LSM1 homolog, U6 small nuclear RNA associated ( <i>S. cerevisiae</i> ) ( <i>Lsm1</i> )                                           | 0.64 |
| <i>Lsm12</i>     | NM_022420.1    | LSM12 homolog ( <i>S. cerevisiae</i> ) ( <i>Lsm12</i> )                                                                          | 0.59 |
| <i>Lsm2</i>      | NM_153410.4    | LSM2 homolog, U6 small nuclear RNA associated ( <i>S. cerevisiae</i> ) ( <i>Lsm2</i> )                                           | 0.41 |
| <i>Lsm3</i>      | NM_134118.3    | LSM3 homolog, U6 small nuclear RNA associated ( <i>S. cerevisiae</i> ) ( <i>Lsm3</i> )                                           | 0.57 |
| <i>Lsm4</i>      | NM_008160.5    | LSM4 homolog, U6 small nuclear RNA associated ( <i>S. cerevisiae</i> ) ( <i>Lsm4</i> )                                           | 0.42 |
| <i>Lsm5</i>      | NM_013535.1    | LSM5 homolog, U6 small nuclear RNA associated ( <i>S. cerevisiae</i> ) ( <i>Lsm5</i> )                                           | 0.44 |
| <i>Lsm6</i>      | NM_080289.1    | LSM6 homolog, U6 small nuclear RNA associated ( <i>S. cerevisiae</i> ) ( <i>Lsm6</i> )                                           | 0.40 |
| <i>Lsm8</i>      | NM_008165.2    | LSM8 homolog, U6 small nuclear RNA associated ( <i>S. cerevisiae</i> ) ( <i>Lsm8</i> )                                           | 0.43 |
| <i>Lss</i>       | NM_016886.2    | lanosterol synthase ( <i>Lss</i> )                                                                                               | 0.37 |
| <i>Ltbp1</i>     | NM_028736      | latent transforming growth factor beta binding protein 1 ( <i>Ltbp1</i> ), transcript variant 2                                  | 0.46 |
| <i>Ly96</i>      | NM_019497.2    | lymphocyte antigen 96 ( <i>Ly96</i> )                                                                                            | 0.55 |
| <i>Lyar</i>      | NM_001081414.1 | Ly1 antibody reactive clone ( <i>Lyar</i> )                                                                                      | 0.58 |
| <i>Lypla2</i>    | NM_153419.1    | lysophospholipase 2 ( <i>Lypla2</i> )                                                                                            | 0.58 |
| <i>Mad21</i>     | NM_010353.1    | MAD2 (mitotic arrest deficient, homolog)-like 1 (yeast) ( <i>Mad21</i> )                                                         | 0.25 |
| <i>Mad21bp</i>   | NM_146066.1    | MAD2L1 binding protein ( <i>Mad21bp</i> )                                                                                        | 0.63 |
| <i>Maged1</i>    | NM_010356.3    | melanoma antigen, family D, 1 ( <i>Maged1</i> )                                                                                  | 0.39 |

|                  |             |                                                                                                          |      |
|------------------|-------------|----------------------------------------------------------------------------------------------------------|------|
| <i>Mageh1</i>    | NM_010357.1 | melanoma antigen, family H, 1 (Mageh1)                                                                   | 0.61 |
| <i>Mak16</i>     | NM_010360.2 | MAK16 homolog (S. cerevisiae) (Mak16)                                                                    | 0.50 |
| <i>Man2a1</i>    | NM_013541.1 | mannosidase 2, alpha 1 (Man2a1)                                                                          | 0.51 |
| <i>Manba</i>     | NM_008185.2 | mannosidase, beta A, lysosomal (Manba)                                                                   | 0.49 |
| <i>Map2k2</i>    | NM_026584.2 | mitogen activated protein kinase kinase 2 (Map2k2)                                                       | 0.66 |
| <i>Map2k3</i>    | NM_026816.3 | mitogen activated protein kinase kinase 3 (Map2k3)                                                       | 0.48 |
| <i>Map2k4</i>    | NM_022011.3 | mitogen activated protein kinase kinase 4 (Map2k4)                                                       | 0.66 |
| <i>Map3k11</i>   | NM_025652.1 | mitogen-activated protein kinase kinase kinase 11 (Map3k11)                                              | 0.64 |
| <i>Map4k4</i>    | NM_207239.1 | mitogen-activated protein kinase kinase kinase kinase 4 (Map4k4)                                         | 0.54 |
| <i>Mapk1ip11</i> | NM_032544.3 | mitogen-activated protein kinase 1 interacting protein 1-like (Mapk1ip11)                                | 0.64 |
| <i>Mapk4</i>     | NM_027000.4 | mitogen-activated protein kinase 4 (Mapk4)                                                               | 0.66 |
| <i>Mapk6</i>     | NM_013882.1 | mitogen-activated protein kinase 6 (Mapk6), transcript variant 2                                         | 0.53 |
| <i>Marcks11</i>  | NM_010368.1 | MARCKS-like 1 (Marcks11)                                                                                 | 0.57 |
| <i>Mast2</i>     | NM_010376.3 | microtubule associated serine/threonine kinase 2 (Mast2), transcript variant 2                           | 0.65 |
| <i>Mbd3</i>      | NM_198622.1 | methyl-CpG binding domain protein 3 (Mbd3)                                                               | 0.61 |
| <i>Mbnl1</i>     | NM_010436.2 | muscleblind-like 1 (Drosophila) (Mbnl1)                                                                  | 0.48 |
| <i>Mboat1</i>    | NM_016750.1 | membrane bound O-acyltransferase domain containing 1 (Mboat1)                                            | 0.47 |
| <i>Mcfcd2</i>    | NM_010380.3 | multiple coagulation factor deficiency 2 (Mcfcd2)                                                        | 0.61 |
| <i>Mcl1</i>      | XM_915849.1 | myeloid cell leukemia sequence 1 (Mcl1)                                                                  | 0.57 |
| <i>Mcm10</i>     | NM_026115.3 | minichromosome maintenance deficient 10 (S. cerevisiae) (Mcm10)                                          | 0.24 |
| <i>Mcm2</i>      | NM_010415.1 | minichromosome maintenance deficient 2 mitotin (S. cerevisiae) (Mcm2)                                    | 0.30 |
| <i>Mcm3</i>      | NM_153198   | minichromosome maintenance deficient 3 (S. cerevisiae) (Mcm3)                                            | 0.55 |
| <i>Mcm4</i>      | NM_010406.1 | minichromosome maintenance deficient 4 homolog (S. cerevisiae) (Mcm4)                                    | 0.27 |
| <i>Mcm5</i>      | NM_008222.2 | minichromosome maintenance deficient 5, cell division cycle 46 (S. cerevisiae) (Mcm5)                    | 0.15 |
| <i>Mcm6</i>      | NM_008229.1 | minichromosome maintenance deficient 6 (MIS5 homolog, S. pombe) (S. cerevisiae) (Mcm6)                   | 0.26 |
| <i>Mcm7</i>      | NM_008230.4 | minichromosome maintenance deficient 7 (S. cerevisiae) (Mcm7)                                            | 0.47 |
| <i>Mdga2</i>     | NM_008231.2 | MAM domain containing glycosylphosphatidylinositol anchor 2 (Mdga2)                                      | 0.38 |
| <i>Mdh1</i>      | NM_144835.4 | malate dehydrogenase 1, NAD (soluble) (Mdh1)                                                             | 0.49 |
| <i>Mdh2</i>      | XM_974905.2 | malate dehydrogenase 2, NAD (mitochondrial) (Mdh2), nuclear gene encoding mitochondrial protein          | 0.28 |
| <i>Med10</i>     | NM_172637.1 | mediator of RNA polymerase II transcription, subunit 10 homolog (NUT2, S. cerevisiae) (Med10)            | 0.58 |
| <i>Mela</i>      | NM_026101.2 |                                                                                                          | 0.23 |
| <i>Melk</i>      | NM_008235.2 | maternal embryonic leucine zipper kinase (Melk)                                                          | 0.66 |
| <i>Mest</i>      | NM_019479.2 | mesoderm specific transcript (Mest)                                                                      | 0.30 |
| <i>Metap1</i>    | NM_138753.2 | methionyl aminopeptidase 1 (Metap1)                                                                      | 0.64 |
| <i>Metrm</i>     | NM_010423.2 |                                                                                                          | 0.34 |
| <i>Mettl9</i>    | NM_029095.1 | methyltransferase like 9 (Mettl9)                                                                        | 0.65 |
| <i>Mex3a</i>     | NM_010431.1 | mex3 homolog A (C. elegans) (Mex3a)                                                                      | 0.57 |
| <i>Mfge8</i>     | NM_008248.2 |                                                                                                          | 0.65 |
| <i>Mfhas1</i>    | NM_146001.1 | malignant fibrous histiocytoma amplified sequence 1 (Mfhas1)                                             | 0.48 |
| <i>Mfn1</i>      | AK087586    | mitofusin 1 (Mfn1)                                                                                       | 0.58 |
| <i>Mif</i>       | NM_016786.2 | macrophage migration inhibitory factor (Mif)                                                             | 0.42 |
| <i>Mki67</i>     | NM_172746.2 | PREDICTED: antigen identified by monoclonal antibody Ki 67 (Mki67)                                       | 0.15 |
| <i>Mki67ip</i>   | NM_178189.3 | Mki67 (FHA domain) interacting nucleolar phosphoprotein (Mki67ip)                                        | 0.54 |
| <i>mkIAA0282</i> | NM_178188.3 |                                                                                                          | 0.32 |
| <i>Mkks</i>      | NM_175661.1 | McKusick-Kaufman syndrome protein (Mkks)                                                                 | 0.65 |
| <i>Mknk2</i>     | NM_178186.2 | MAP kinase-interacting serine/threonine kinase 2 (Mknk2)                                                 | 0.60 |
| <i>Mllt11</i>    | NM_175659.1 | myeloid/lymphoid or mixed-lineage leukemia (trithorax homolog, Drosophila); translocated to, 11 (Mllt11) | 0.40 |
| <i>Mmp14</i>     | NM_178182.1 | matrix metalloproteinase 14 (membrane-inserted) (Mmp14)                                                  | 0.64 |
| <i>Mmp15</i>     | NM_178183.1 | matrix metalloproteinase 15 (Mmp15)                                                                      | 0.31 |
| <i>Mmp17</i>     | NM_178184.1 | matrix metalloproteinase 17 (Mmp17)                                                                      | 0.58 |
| <i>Mod1</i>      | NM_178185.1 | malic enzyme, supernatant (Mod1)                                                                         | 0.51 |
| <i>Mphosph6</i>  | NM_178194.3 | M phase phosphoprotein 6 (Mphosph6)                                                                      | 0.55 |
| <i>Mphosph9</i>  | NM_013549.1 | M-phase phosphoprotein 9 (Mphosph9)                                                                      | 0.47 |
| <i>Mpi</i>       | NM_178212.1 | mannose phosphate isomerase (Mpi)                                                                        | 0.58 |
| <i>Mpnd</i>      | NM_178213.3 | MPN domain containing (Mpnd)                                                                             | 0.60 |
| <i>Mre11a</i>    | NM_175662.1 | meiotic recombination 11 homolog A (S. cerevisiae) (Mre11a)                                              | 0.57 |
| <i>Mrpl10</i>    | NM_016660.2 | mitochondrial ribosomal protein L10 (Mrpl10), nuclear gene encoding mitochondrial protein                | 0.63 |
| <i>Mrpl12</i>    | NM_008252.2 | mitochondrial ribosomal protein L12 (Mrpl12), nuclear gene encoding mitochondrial protein                | 0.43 |
| <i>Mrpl15</i>    | NM_008254.1 |                                                                                                          | 0.45 |
| <i>Mrpl17</i>    | NM_008255.1 |                                                                                                          | 0.51 |
| <i>Mrpl18</i>    | NM_016957.3 | mitochondrial ribosomal protein L18 (Mrpl18), nuclear gene encoding mitochondrial protein                | 0.60 |

|                   |                |                                                                                                   |      |
|-------------------|----------------|---------------------------------------------------------------------------------------------------|------|
| <i>Mrpl2</i>      | NM_008258.1    | mitochondrial ribosomal protein L2 (Mrpl2), nuclear gene encoding mitochondrial protein           | 0.52 |
| <i>Mrpl20</i>     | NM_198937.2    | mitochondrial ribosomal protein L20 (Mrpl20), nuclear gene encoding mitochondrial protein         | 0.49 |
| <i>Mrpl22</i>     | NM_182650.3    | mitochondrial ribosomal protein L22 (Mrpl22), nuclear gene encoding mitochondrial protein         | 0.62 |
| <i>Mrpl23</i>     | NM_001048061.1 | mitochondrial ribosomal protein L23 (Mrpl23), nuclear gene encoding mitochondrial protein         | 0.61 |
| <i>Mrpl3</i>      | NM_133834.1    | mitochondrial ribosomal protein L3 (Mrpl3), nuclear gene encoding mitochondrial protein           | 0.64 |
| <i>Mrpl30</i>     | NM_021510.2    | mitochondrial ribosomal protein L30 (Mrpl30), nuclear gene encoding mitochondrial protein         | 0.54 |
| <i>Mrpl34</i>     | NM_025279.2    | mitochondrial ribosomal protein L34 (Mrpl34), nuclear gene encoding mitochondrial protein         | 0.51 |
| <i>Mrpl37</i>     | NM_010447      | mitochondrial ribosomal protein L37 (Mrpl37), nuclear gene encoding mitochondrial protein         | 0.60 |
| <i>Mrpl38</i>     | AK013709       | mitochondrial ribosomal protein L38 (Mrpl38), nuclear gene encoding mitochondrial protein         | 0.60 |
| <i>Mrpl40</i>     | NM_016690.2    | mitochondrial ribosomal protein L40 (Mrpl40), nuclear gene encoding mitochondrial protein         | 0.61 |
| <i>Mrpl43</i>     | NM_177301.4    | mitochondrial ribosomal protein L43 (Mrpl43), nuclear gene encoding mitochondrial protein         | 0.65 |
| <i>Mrpl47</i>     | NM_144802.3    | mitochondrial ribosomal protein L47 (Mrpl47), nuclear gene encoding mitochondrial protein         | 0.64 |
| <i>Mrpl50</i>     | NM_029804.1    | mitochondrial ribosomal protein L50 (Mrpl50), nuclear gene encoding mitochondrial protein         | 0.66 |
| <i>Mrpl52</i>     | NM_152134.1    | mitochondrial ribosomal protein L52 (Mrpl52), nuclear gene encoding mitochondrial protein         | 0.54 |
| <i>Mrpl53</i>     | NM_175606.2    | mitochondrial ribosomal protein L53 (Mrpl53), nuclear gene encoding mitochondrial protein         | 0.44 |
| <i>Mrpl54</i>     | NM_016677.1    | mitochondrial ribosomal protein L54 (Mrpl54), nuclear gene encoding mitochondrial protein         | 0.58 |
| <i>Mrps10</i>     | NM_013556.2    |                                                                                                   | 0.50 |
| <i>Mrps16</i>     | NM_008284      | mitochondrial ribosomal protein S16 (Mrps16), nuclear gene encoding mitochondrial protein         | 0.49 |
| <i>Mrps18b</i>    | NM_019830.1    | mitochondrial ribosomal protein S18B (Mrps18b), nuclear gene encoding mitochondrial protein       | 0.50 |
| <i>Mrps18c</i>    | NM_008287.2    | mitochondrial ribosomal protein S18C (Mrps18c), nuclear gene encoding mitochondrial protein       | 0.62 |
| <i>Mrps2</i>      | NM_011828.2    | mitochondrial ribosomal protein S2 (Mrps2), nuclear gene encoding mitochondrial protein           | 0.64 |
| <i>Mrps23</i>     | NM_018805.2    | mitochondrial ribosomal protein S23 (Mrps23), nuclear gene encoding mitochondrial protein         | 0.66 |
| <i>Mrps24</i>     | NM_015819.3    | mitochondrial ribosomal protein S24 (Mrps24), nuclear gene encoding mitochondrial protein         | 0.66 |
| <i>Mrps28</i>     | NM_019657.2    | mitochondrial ribosomal protein S28 (Mrps28), nuclear gene encoding mitochondrial protein         | 0.57 |
| <i>Mrps30</i>     | NM_010476.3    | mitochondrial ribosomal protein S30 (Mrps30), nuclear gene encoding mitochondrial protein         | 0.61 |
| <i>Mrps31</i>     | NM_153193.2    | mitochondrial ribosomal protein S31 (Mrps31), nuclear gene encoding mitochondrial protein         | 0.65 |
| <i>Mrps35</i>     | NM_008302.3    | mitochondrial ribosomal protein S35 (Mrps35), nuclear gene encoding mitochondrial protein         | 0.56 |
| <i>Mrps7</i>      | NM_011631.1    | mitochondrial ribosomal protein S7 (Mrps7)                                                        | 0.49 |
| <i>Mrps9</i>      | NM_008301.4    | mitochondrial ribosomal protein S9 (Mrps9)                                                        | 0.62 |
| <i>Mrto4</i>      | NM_031165.4    | MRT4, mRNA turnover 4, homolog (S. cerevisiae) (Mrto4)                                            | 0.53 |
| <i>Msto1</i>      | NM_010481.1    | misato homolog 1 (Drosophila) (Msto1)                                                             | 0.66 |
| <i>Mta2</i>       | NM_030704.1    | metastasis-associated gene family, member 2 (Mta2)                                                | 0.66 |
| <i>Mtap</i>       | NM_010477.3    | methylthioadenosine phosphorylase (Mtap)                                                          | 0.56 |
| <i>Mtap1s</i>     | NM_008303.2    | microtubule-associated protein 1S (Mtap1s)                                                        | 0.66 |
| <i>Mtap7d1</i>    |                | microtubule-associated protein 7 domain containing 1 (Mtap7d1)                                    | 0.63 |
| <i>mt-Atp6</i>    | NM_016865.2    |                                                                                                   | 0.65 |
| <i>Mtch2</i>      | NM_019564.2    | mitochondrial carrier homolog 2 (C. elegans) (Mtch2), nuclear gene encoding mitochondrial protein | 0.56 |
| <i>mt-Co2</i>     | NM_019752.2    |                                                                                                   | 0.55 |
| <i>Mtdh</i>       | NM_010489.2    | Metadherin (Mtdh)                                                                                 | 0.49 |
| <i>mtDNA_ATP8</i> | NM_010490.2    |                                                                                                   | 0.55 |
| <i>mtDNA_ND1</i>  | NM_172015.1    |                                                                                                   | 0.66 |
| <i>Mthfd2</i>     | NM_198653.1    |                                                                                                   | 0.21 |
| <i>Mtmr11</i>     | XM_135030.4    | myotubularin related protein 11 (Mtmr11)                                                          | 0.40 |

|                       |                |                                                                                                                   |      |
|-----------------------|----------------|-------------------------------------------------------------------------------------------------------------------|------|
| <i>Mttr12</i>         | NM_019987.1    | myotubularin related protein 12 (Mttr12)                                                                          | 0.53 |
| <i>Mttr2</i>          | NM_031166.2    | myotubularin related protein 2 (Mttr2)                                                                            | 0.58 |
| <i>Mtx1</i>           | AK013239       | metaxin 1 (Mtx1)                                                                                                  | 0.66 |
| <i>Mvd</i>            | NM_031156.2    | mevalonate (diphospho) decarboxylase (Mvd)                                                                        | 0.56 |
| <i>Mxra8</i>          | NM_029573.2    | matrix-remodelling associated 8 (Mxra8)                                                                           | 0.44 |
| <i>Mybbp1a</i>        | NM_133662.2    | MYB binding protein (P160) 1a (Mybbp1a)                                                                           | 0.47 |
| <i>Mybl2</i>          | NM_030244.3    | myeloblastosis oncogene-like 2 (Mybl2)                                                                            | 0.48 |
| <i>Myef2</i>          | NM_010501.2    | myelin basic protein expression factor 2, repressor (Myef2)                                                       | 0.53 |
| <i>Myh9</i>           | NM_026820.2    |                                                                                                                   | 0.47 |
| <i>Mylk</i>           | NM_008338.2    | myosin, light polypeptide kinase (Mylk)                                                                           | 0.27 |
| <i>Myo1b</i>          | NM_031177.2    | myosin IB (Myo1b)                                                                                                 | 0.65 |
| <i>Myo5a</i>          | NM_009879.2    | myosin Va (Myo5a)                                                                                                 | 0.50 |
| <i>Myo6</i>           | NM_010515.1    | myosin VI (Myo6)                                                                                                  | 0.58 |
| <i>N4wbp5-pending</i> | NM_008342.2    |                                                                                                                   | 0.60 |
| <i>N6amt2</i>         | NM_008343.2    | N-6 adenine-specific DNA methyltransferase 2 (putative) (N6amt2)                                                  | 0.51 |
| <i>Nab1</i>           | NM_010517.3    | Ngfi-A binding protein 1 (Nab1)                                                                                   | 0.59 |
| <i>Naca</i>           | NM_010518.2    | nascent polypeptide-associated complex alpha polypeptide (Naca)                                                   | 0.43 |
| <i>Naglu</i>          | NM_008048.2    | alpha-N-acetylglucosaminidase (Sanfilippo disease IIIB) (Naglu)                                                   | 0.54 |
| <i>Nans</i>           | NM_018741.1    | N-acetylneuraminic acid synthase (sialic acid synthase) (Nans)                                                    | 0.48 |
| <i>Nap111</i>         | NM_170599.2    | nucleosome assembly protein 1-like 1 (Nap111)                                                                     | 0.39 |
| <i>Nap115</i>         | NM_019440.2    | nucleosome assembly protein 1-like 5 (Nap115)                                                                     | 0.60 |
| <i>Narg1</i>          | NM_010555.4    | NMDA receptor-regulated gene 1 (Narg1)                                                                            | 0.47 |
| <i>Nars</i>           | NM_010560.2    | asparaginyl-tRNA synthetase (Nars)                                                                                | 0.66 |
| <i>Nasp</i>           | NM_026374.3    |                                                                                                                   | 0.45 |
| <i>Nat5</i>           | NM_173751.3    | N-acetyltransferase 5 (ARD1 homolog, <i>S. cerevisiae</i> ) (Nat5)                                                | 0.47 |
| <i>Nav1</i>           | NM_029673.2    |                                                                                                                   | 0.45 |
| <i>Ncan</i>           | NM_133976.1    | neurocan (Ncan)                                                                                                   | 0.31 |
| <i>Ncapd2</i>         | NM_053261.2    | non-SMC condensin I complex, subunit D2 (Ncapd2)                                                                  | 0.22 |
| <i>Ncapd3</i>         | NM_177730.3    | non-SMC condensin II complex, subunit D3 (Ncapd3)                                                                 | 0.58 |
| <i>Ncaph</i>          | NM_011830      | non-SMC condensin I complex, subunit H (Ncaph)                                                                    | 0.19 |
| <i>Ncdn</i>           | NM_016692.1    | neurochondrin (Ncdn)                                                                                              | 0.56 |
| <i>Ncl</i>            | NM_133345.2    | nucleolin (Ncl)                                                                                                   | 0.66 |
| <i>Ncstn</i>          | NM_178641.3    | nicastrin (Ncstn)                                                                                                 | 0.57 |
| <i>Ndc80</i>          | NM_008916.2    | NDC80 homolog, kinetochore complex component ( <i>S. cerevisiae</i> ) (Ndc80)                                     | 0.43 |
| <i>Ndfip1</i>         | NM_153526.4    | Nedd4 family interacting protein 1 (Ndfip1)                                                                       | 0.61 |
| <i>Ndufa12</i>        | NM_013754.1    | NADH dehydrogenase (ubiquinone) 1 alpha subcomplex, 12 (Ndufa12)                                                  | 0.55 |
| <i>Ndufa12l</i>       | NM_178632.4    | PREDICTED: Ndufa12-like (Ndufa12l)                                                                                | 0.51 |
| <i>Ndufa3</i>         | NM_024267.6    | NADH dehydrogenase (ubiquinone) 1 alpha subcomplex, 3 (Ndufa3)                                                    | 0.67 |
| <i>Ndufa4</i>         | NM_023579.4    | NADH dehydrogenase (ubiquinone) 1 alpha subcomplex, 4 (Ndufa4)                                                    | 0.54 |
| <i>Ndufa5</i>         | NM_153774.1    | NADH dehydrogenase (ubiquinone) 1 alpha subcomplex, 5 (Ndufa5), nuclear gene encoding mitochondrial protein       | 0.54 |
| <i>Ndufa6</i>         | NM_177128.3    | NADH dehydrogenase (ubiquinone) 1 alpha subcomplex, 6 (B14) (Ndufa6), nuclear gene encoding mitochondrial protein | 0.60 |
| <i>Ndufa8</i>         | NM_178378.2    | NADH dehydrogenase (ubiquinone) 1 alpha subcomplex, 8 (Ndufa8), nuclear gene encoding mitochondrial protein       | 0.59 |
| <i>Ndufa9</i>         | NM_016721      | NADH dehydrogenase (ubiquinone) 1 alpha subcomplex, 9 (Ndufa9)                                                    | 0.61 |
| <i>Ndufb10</i>        | NM_001033484.1 |                                                                                                                   | 0.62 |
| <i>Ndufb3</i>         | NM_026921.2    | NADH dehydrogenase (ubiquinone) 1 beta subcomplex 3 (Ndufb3)                                                      | 0.60 |
| <i>Ndufb5</i>         | NM_133934.2    | NADH dehydrogenase (ubiquinone) 1 beta subcomplex, 5 (Ndufb5), nuclear gene encoding mitochondrial protein        | 0.58 |
| <i>Ndufb6</i>         | NM_013565.2    | NADH dehydrogenase (ubiquinone) 1 beta subcomplex, 6 (Ndufb6), nuclear gene encoding mitochondrial protein        | 0.44 |
| <i>Ndufb8</i>         | NM_008402.1    | NADH dehydrogenase (ubiquinone) 1 beta subcomplex 8 (Ndufb8)                                                      | 0.63 |
| <i>Ndufc1</i>         | NM_010578.1    | NADH dehydrogenase (ubiquinone) 1, subcomplex unknown, 1 (Ndufc1)                                                 | 0.49 |
| <i>Ndufc2</i>         | NM_010580.1    | NADH dehydrogenase (ubiquinone) 1, subcomplex unknown, 2 (Ndufc2)                                                 | 0.50 |
| <i>Ndufs2</i>         | NM_008407.1    | NADH dehydrogenase (ubiquinone) Fe-S protein 2 (Ndufs2)                                                           | 0.62 |
| <i>Ndufs3</i>         | NM_008410.1    | NADH dehydrogenase (ubiquinone) Fe-S protein 3 (Ndufs3)                                                           | 0.63 |
| <i>Ndufs4</i>         | NM_172584.3    | NADH dehydrogenase (ubiquinone) Fe-S protein 4 (Ndufs4), nuclear gene encoding mitochondrial protein              | 0.58 |
| <i>Ndufs7</i>         | XM_205854      | NADH dehydrogenase (ubiquinone) Fe-S protein 7 (Ndufs7), nuclear gene encoding mitochondrial protein              | 0.62 |
| <i>Ndufs8</i>         | NM_019923.3    | NADH dehydrogenase (ubiquinone) Fe-S protein 8 (Ndufs8)                                                           | 0.56 |
| <i>Ndufv1</i>         | NM_026365.2    | NADH dehydrogenase (ubiquinone) flavoprotein 1 (Ndufv1), nuclear gene encoding mitochondrial protein              | 0.66 |
| <i>Ndufv2</i>         | NM_146145.2    | NADH dehydrogenase (ubiquinone) flavoprotein 2 (Ndufv2)                                                           | 0.52 |
| <i>Necap1</i>         | NM_178394.3    | NECAP endocytosis associated 1 (Necap1)                                                                           | 0.62 |
| <i>Nedd1</i>          | NM_023844.2    |                                                                                                                   | 0.61 |
| <i>Nek3</i>           | NM_033398.2    | NIMA (never in mitosis gene a)-related expressed kinase 3 (Nek3)                                                  | 0.52 |
| <i>Nes</i>            | NM_025368.3    | nestin (Nes)                                                                                                      | 0.51 |
| <i>Neto2</i>          | NM_010591.1    | neuroligin (NRP) and tolloid (TLL)-like 2 (Neto2)                                                                 | 0.56 |

|                  |                |                                                                                                  |      |
|------------------|----------------|--------------------------------------------------------------------------------------------------|------|
| <i>Neu1</i>      | NM_172872.2    | neuraminidase 1 (Neu1)                                                                           | 0.65 |
| <i>Neurl</i>     | NM_053092.1    |                                                                                                  | 0.30 |
| <i>Nfatc3</i>    | NM_145958.1    | nuclear factor of activated T-cells, cytoplasmic, calcineurin-dependent 3 (Nfatc3)               | 0.61 |
| <i>Nfib</i>      | NM_013568.3    | nuclear factor I/B (Nfib)                                                                        | 0.65 |
| <i>Nfkbiz</i>    | NM_008421.2    | nuclear factor of kappa light polypeptide gene enhancer in B-cells inhibitor, zeta (Nfkbiz)      | 0.55 |
| <i>Nhlrc2</i>    | NM_145922.2    | NHL repeat containing 2 (Nhlrc2)                                                                 | 0.58 |
| <i>Nip7</i>      | NM_019789.2    | nuclear import 7 homolog (S. cerevisiae) (Nip7)                                                  | 0.63 |
| <i>Nipsnap3a</i> | NM_008430.1    | nipsnap homolog 3A (C. elegans) (Nipsnap3a)                                                      | 0.56 |
| <i>Nkrf</i>      | NM_146037.1    | NF-kappaB repressing factor (Nkrf)                                                               | 0.58 |
| <i>Nkx2-2</i>    | NM_010607.1    | NK2 transcription factor related, locus 2 (Drosophila) (Nkx2-2), transcript variant 1            | 0.37 |
| <i>Nme1</i>      | NM_177715.4    | non-metastatic cells 1, protein (NM23A) expressed in (Nme1)                                      | 0.37 |
| <i>Nme2</i>      | NM_025888.5    | non-metastatic cells 2, protein (NM23B) expressed in (Nme2), transcript variant 1                | 0.35 |
| <i>Nme4</i>      | NM_027008.1    | non-metastatic cells 4, protein expressed in (Nme4), nuclear gene encoding mitochondrial protein | 0.58 |
| <i>Nmral1</i>    | NM_023645.2    | NmrA-like family domain containing 1 (Nmral1)                                                    | 0.58 |
| <i>Nmt1</i>      | NM_025841.3    | N-myristoyltransferase 1 (Nmt1)                                                                  | 0.60 |
| <i>Noc2l</i>     | NM_011317.3    | nucleolar complex associated 2 homolog (S. cerevisiae) (Noc2l)                                   | 0.52 |
| <i>Noc4l</i>     | NM_010615.1    | nucleolar complex associated 4 homolog (S. cerevisiae) (Noc4l)                                   | 0.61 |
| <i>Nol1</i>      | NM_010620.1    | nucleolar protein 1 (Nol1)                                                                       | 0.55 |
| <i>Nol10</i>     | NM_139303.1    | nucleolar protein 10 (Nol10)                                                                     | 0.63 |
| <i>Nol5</i>      | NM_183046.1    | nucleolar protein 5 (Nol5)                                                                       | 0.27 |
| <i>Nol5a</i>     | NM_016705.2    | nucleolar protein 5A (Nol5a)                                                                     | 0.45 |
| <i>Nola1</i>     | NM_145588.1    | nucleolar protein family A, member 1 (H/ACA small nucleolar RNPs) (Nola1)                        | 0.38 |
| <i>Nola2</i>     | NM_024245      | nucleolar protein family A, member 2 (Nola2)                                                     | 0.47 |
| <i>Nola3</i>     | NM_134471.3    | nucleolar protein family A, member 3 (Nola3)                                                     | 0.40 |
| <i>Nomo1</i>     | NM_008445.2    | nodal modulator 1 (Nomo1)                                                                        | 0.37 |
| <i>Npc2</i>      | NM_008446.1    | Niemann Pick type C2 (Npc2)                                                                      | 0.64 |
| <i>Npm1</i>      | NM_016761.1    | nucleophosmin 1 (Npm1)                                                                           | 0.43 |
| <i>Npm3</i>      | NM_026324.2    | nucleoplasmin 3 (Npm3)                                                                           | 0.22 |
| <i>Npm3-ps1</i>  | NM_013598.1    | nucleoplasmin 3, pseudogene 1 (Npm3-ps1), non-coding RNA.                                        | 0.20 |
| <i>Nptn</i>      | NM_011803.2    | neuroplastin (Nptn)                                                                              | 0.54 |
| <i>Nptx1</i>     | AK086122       | neuronal pentraxin 1 (Nptx1)                                                                     | 0.22 |
| <i>Nqo2</i>      | NM_027117.1    | NAD(P)H dehydrogenase, quinone 2 (Nqo2)                                                          | 0.56 |
| <i>Nr2c2ap</i>   | NM_030075.1    | nuclear receptor 2C2-associated protein (Nr2c2ap), transcript variant 2                          | 0.67 |
| <i>Nr2f6</i>     | NM_172052.1    | nuclear receptor subfamily 2, group F, member 6 (Nr2f6)                                          | 0.62 |
| <i>Nrarp</i>     | NM_177261.4    | Notch-regulated ankyrin repeat protein (Nrarp)                                                   | 0.43 |
| <i>Nrcam</i>     | NM_001042421.1 | neuron-glia-CAM-related cell adhesion molecule (Nrcam)                                           | 0.53 |
| <i>Nrd1</i>      | NM_008465.4    | nardilysin, N-arginine dibasic convertase, NRD convertase 1 (Nrd1)                               | 0.60 |
| <i>Nrm</i>       | NM_010655.3    | nurim (nuclear envelope membrane protein) (Nrm)                                                  | 0.24 |
| <i>Nrn1</i>      | NM_008379.3    | neuritin 1 (Nrn1)                                                                                | 0.38 |
| <i>Nrp1</i>      | NM_021284.4    | neuropilin 1 (Nrp1)                                                                              | 0.46 |
| <i>Nsbp1</i>     | NM_025327.2    | nucleosome binding protein 1 (Nsbp1)                                                             | 0.53 |
| <i>Nsdhl</i>     | NM_024291.3    | NAD(P) dependent steroid dehydrogenase-like (Nsdhl)                                              | 0.44 |
| <i>Nsep1</i>     | NM_001081171.2 |                                                                                                  | 0.47 |
| <i>Nsfl1c</i>    | NM_008483.2    | NSFL1 (p97) cofactor (p47) (Nsfl1c)                                                              | 0.62 |
| <i>Nt5c</i>      | NM_010683.1    | 5',3'-nucleotidase, cytosolic (Nt5c)                                                             | 0.65 |
| <i>Nt5dc2</i>    | NM_001017959.1 | 5'-nucleotidase domain containing 2 (Nt5dc2)                                                     | 0.54 |
| <i>Ntan1</i>     | NM_029789.1    |                                                                                                  | 0.64 |
| <i>Nubp1</i>     | NM_028015.2    | nucleotide binding protein 1 (Nubp1)                                                             | 0.35 |
| <i>Nucb1</i>     | NM_029999.3    | nucleobindin 1 (Nucb1)                                                                           | 0.65 |
| <i>Nudc</i>      | NM_133815      | nuclear distribution gene C homolog (Aspergillus) (Nudc)                                         | 0.64 |
| <i>Nudt19</i>    | NM_010699.1    | nudix (nucleoside diphosphate linked moiety X)-type motif 19 (Nudt19)                            | 0.61 |
| <i>Nudt21</i>    | NM_001039522.1 | nudix (nucleoside diphosphate linked moiety X)-type motif 21 (Nudt21)                            | 0.44 |
| <i>Nudt5</i>     | NM_008495.1    | nudix (nucleoside diphosphate linked moiety X)-type motif 5 (Nudt5)                              | 0.44 |
| <i>Nup133</i>    | NM_010705.2    | nucleoporin 133 (Nup133)                                                                         | 0.61 |
| <i>Nup160</i>    | NM_010706.1    | nucleoporin 160 (Nup160)                                                                         | 0.52 |
| <i>Nup205</i>    | NM_018886.3    | PREDICTED: nucleoporin 205, transcript variant 1 (Nup205)                                        | 0.36 |
| <i>Nup210</i>    | NM_145219.2    | nucleoporin 210 (Nup210)                                                                         | 0.19 |
| <i>Nup43</i>     | NM_008133.3    | nucleoporin 43 (Nup43)                                                                           | 0.45 |
| <i>Nup62</i>     | NM_175386.3    | nucleoporin 62 (Nup62)                                                                           | 0.32 |
| <i>Nup85</i>     | NM_010715.2    | nucleoporin 85 (Nup85)                                                                           | 0.51 |
| <i>Nup88</i>     | NM_010716      | nucleoporin 88 (Nup88), transcript variant 1                                                     | 0.48 |
| <i>Nus1</i>      | NM_013860.1    | nuclear undecaprenyl pyrophosphate synthase 1 homolog (S. cerevisiae) (Nus1)                     | 0.57 |
| <i>Nusap1</i>    | NM_001034030.1 | nucleolar and spindle associated protein 1 (Nusap1), transcript variant 2                        | 0.21 |
| <i>Nxph1</i>     | NM_172714.1    | neurexophilin 1 (Nxph1)                                                                          | 0.16 |
| <i>Nxt1</i>      | NM_021460.1    | NTF2-related export protein 1 (Nxt1)                                                             | 0.54 |



|                 |                |                                                                                                     |      |
|-----------------|----------------|-----------------------------------------------------------------------------------------------------|------|
| <i>Ociad2</i>   | NM_153404.2    | OCIA domain containing 2 ( <i>Ociad2</i> )                                                          | 0.37 |
| <i>Ogdh</i>     | NM_019980.1    | oxoglutarate dehydrogenase (lipoamide) ( <i>Ogdh</i> ), nuclear gene encoding mitochondrial protein | 0.60 |
| <i>Ola1</i>     | NM_025681.2    | Obg-like ATPase 1 ( <i>Ola1</i> ), transcript variant 1                                             | 0.59 |
| <i>Olfm2</i>    | NM_008502.1    | olfactomedin 2 ( <i>Olfm2</i> )                                                                     | 0.43 |
| <i>Olfml2b</i>  | NM_027400.2    | olfactomedin-like 2B ( <i>Olfml2b</i> )                                                             | 0.41 |
| <i>Olig1</i>    | NM_010721.1    | oligodendrocyte transcription factor 1 ( <i>Olig1</i> )                                             | 0.41 |
| <i>Opn3</i>     | NM_008505.3    | opsin 3 ( <i>Opn3</i> )                                                                             | 0.53 |
| <i>Oprs1</i>    | XM_001472500.1 | opioid receptor, sigma 1 ( <i>Oprs1</i> )                                                           | 0.57 |
| <i>Orai1</i>    | XM_001473099.1 | ORAI calcium release-activated calcium modulator 1 ( <i>Orai1</i> )                                 | 0.61 |
| <i>Orc5l</i>    | XM_001473215.1 | origin recognition complex, subunit 5-like ( <i>S. cerevisiae</i> ) ( <i>Orc5l</i> )                | 0.62 |
| <i>Orc6l</i>    | XR_031048.1    | origin recognition complex, subunit 6-like ( <i>S. cerevisiae</i> ) ( <i>Orc6l</i> )                | 0.48 |
| <i>Osbp3</i>    | XM_001473500.1 | oxysterol binding protein-like 3 ( <i>Osbp3</i> )                                                   | 0.67 |
| <i>Osbp6</i>    | XM_001475112.1 | oxysterol binding protein-like 6 ( <i>Osbp6</i> )                                                   | 0.32 |
| <i>Osbp8</i>    | XM_001475189.1 | oxysterol binding protein-like 8 ( <i>Osbp8</i> ), transcript variant 1                             | 0.66 |
| <i>Ostm1</i>    | XM_001475096.1 | osteopetrosis associated transmembrane protein 1 ( <i>Ostm1</i> )                                   | 0.52 |
| <i>Oxct1</i>    | XM_001476627.1 | 3-oxoacid CoA transferase 1 ( <i>Oxct1</i> )                                                        | 0.65 |
| <i>Oxr1</i>     | XM_001478166.1 | oxidation resistance 1 ( <i>Oxr1</i> ), transcript variant 1                                        | 0.59 |
| <i>P2ry5</i>    | XM_001478119.1 | purinergic receptor P2Y, G-protein coupled, 5 ( <i>P2ry5</i> )                                      | 0.30 |
| <i>P4hb</i>     | XM_001477137.1 | prolyl 4-hydroxylase, beta polypeptide ( <i>P4hb</i> )                                              | 0.54 |
| <i>Pa2g4</i>    | XM_001478555.1 | proliferation-associated 2G4 ( <i>Pa2g4</i> )                                                       | 0.40 |
| <i>Pabpc4</i>   | XM_001478518.1 | poly A binding protein, cytoplasmic 4 ( <i>Pabpc4</i> ), transcript variant 1                       | 0.50 |
| <i>Pafah1b1</i> | XM_001478939.1 | platelet-activating factor acetylhydrolase, isoform 1b, beta1 subunit ( <i>Pafah1b1</i> )           | 0.55 |
| <i>Pafah1b3</i> | XM_001479207.1 | platelet-activating factor acetylhydrolase, isoform 1b, alpha1 subunit ( <i>Pafah1b3</i> )          | 0.66 |
| <i>Pak4</i>     | XM_001479822.1 | p21 (CDKN1A)-activated kinase 4 ( <i>Pak4</i> )                                                     | 0.66 |
| <i>Palmd</i>    | XM_001480293.1 | palmdelphin ( <i>Palmd</i> )                                                                        | 0.41 |
| <i>Pank1</i>    | XM_001480197.1 | pantothenate kinase 1 ( <i>Pank1</i> ), transcript variant 2                                        | 0.62 |
| <i>Pank3</i>    | XM_001479903.1 | pantothenate kinase 3 ( <i>Pank3</i> )                                                              | 0.64 |
| <i>Parp1</i>    | XM_001480106.1 | poly (ADP-ribose) polymerase family, member 1 ( <i>Parp1</i> )                                      | 0.52 |
| <i>Pbk</i>      | XM_001480194.1 | PDZ binding kinase ( <i>Pbk</i> )                                                                   | 0.08 |
| <i>Pbrm1</i>    | XM_001481024.1 | polybromo 1 ( <i>Pbrm1</i> )                                                                        | 0.66 |
| <i>Pcbp1</i>    | XM_001480621.1 | poly(rC) binding protein 1 ( <i>Pcbp1</i> )                                                         | 0.45 |
| <i>Pcbp2</i>    | XM_001481075.1 | poly(rC) binding protein 2 ( <i>Pcbp2</i> )                                                         | 0.57 |
| <i>Pcdh17</i>   | XM_001481083.1 | protocadherin 17 ( <i>Pcdh17</i> )                                                                  | 0.46 |
| <i>Pcdh7</i>    | XM_001481017.1 | protocadherin 7 ( <i>Pcdh7</i> )                                                                    | 0.45 |
| <i>Pcdh9</i>    | XM_001481025.1 | protocadherin 9 ( <i>Pcdh9</i> )                                                                    | 0.55 |
| <i>Pcyt2</i>    | XM_001481214.1 | phosphate cytidyltransferase 2, ethanolamine ( <i>Pcyt2</i> )                                       | 0.64 |
| <i>Pdap1</i>    | XM_001474702.1 | PDGFA associated protein 1 ( <i>Pdap1</i> )                                                         | 0.36 |
| <i>Pdcd2l</i>   | XM_001471637.1 | programmed cell death 2-like ( <i>Pdcd2l</i> )                                                      | 0.62 |
| <i>Pdgfa</i>    | XM_001471968.1 |                                                                                                     | 0.38 |
| <i>Pdhb</i>     | XM_001472489.1 | pyruvate dehydrogenase (lipoamide) beta ( <i>Pdhb</i> )                                             | 0.54 |
| <i>Pdia3</i>    | XM_001472256.1 | protein disulfide isomerase associated 3 ( <i>Pdia3</i> )                                           | 0.49 |
| <i>Pdia5</i>    | XM_001473268.1 | protein disulfide isomerase associated 5 ( <i>Pdia5</i> )                                           | 0.41 |
| <i>Pdlim4</i>   | XM_001472872.1 | PDZ and LIM domain 4 ( <i>Pdlim4</i> )                                                              | 0.63 |
| <i>Pdlim5</i>   | XM_001473652.1 | PDZ and LIM domain 5 ( <i>Pdlim5</i> ), transcript variant 1                                        | 0.62 |
| <i>Pdss1</i>    | XR_031422.1    | prenyl (solaneyl) diphosphate synthase, subunit 1 ( <i>Pdss1</i> )                                  | 0.53 |
| <i>Pdpx</i>     | XR_031278.1    | pyridoxal (pyridoxine, vitamin B6) phosphatase ( <i>Pdpx</i> )                                      | 0.54 |
| <i>Pdzrn4</i>   | XM_001474658.1 | PREDICTED: PDZ domain containing RING finger 4 ( <i>Pdzrn4</i> )                                    | 0.49 |
| <i>Peli1</i>    | XM_001473900.1 | pellino 1 ( <i>Peli1</i> )                                                                          | 0.56 |
| <i>Pfdn2</i>    | XR_031575.1    | prefoldin 2 ( <i>Pfdn2</i> )                                                                        | 0.59 |
| <i>Pfdn4</i>    | XM_001474411.1 | prefoldin 4 ( <i>Pfdn4</i> ), transcript variant 2                                                  | 0.32 |
| <i>Pfn1</i>     | XM_001473941.1 | profilin 1 ( <i>Pfn1</i> )                                                                          | 0.44 |
| <i>Pgam1</i>    | XM_001474718.1 | phosphoglycerate mutase 1 ( <i>Pgam1</i> )                                                          | 0.54 |
| <i>Pgam5</i>    | XR_031705.1    | phosphoglycerate mutase family member 5 ( <i>Pgam5</i> )                                            | 0.45 |
| <i>Pgk1</i>     | XM_001475152.1 | phosphoglycerate kinase 1 ( <i>Pgk1</i> )                                                           | 0.55 |
| <i>Pgls</i>     | XR_031796.1    | 6-phosphogluconolactonase ( <i>Pgls</i> )                                                           | 0.52 |
| <i>Pgp</i>      | XR_031944.1    | phosphoglycolate phosphatase ( <i>Pgp</i> )                                                         | 0.34 |
| <i>Pgs1</i>     | XM_001475019.1 | phosphatidylglycerophosphate synthase 1 ( <i>Pgs1</i> )                                             | 0.64 |
| <i>Phb2</i>     | XM_001475055.1 | prohibitin 2 ( <i>Phb2</i> )                                                                        | 0.42 |
| <i>Phc2</i>     | XM_001475106.1 | polyhomeotic-like 2 ( <i>Drosophila</i> ) ( <i>Phc2</i> )                                           | 0.41 |
| <i>Phca</i>     | XR_032154.1    | phytoceramidase, alkaline ( <i>Phca</i> )                                                           | 0.65 |
| <i>Phf10</i>    | XM_001475298.1 | PHD finger protein 10 ( <i>Phf10</i> )                                                              | 0.62 |
| <i>Phf20</i>    | XM_001475422.1 | PHD finger protein 20 ( <i>Phf20</i> )                                                              | 0.46 |
| <i>Phf5a</i>    | XM_001475447.1 | PHD finger protein 5A ( <i>Phf5a</i> )                                                              | 0.57 |
| <i>Phf6</i>     | XM_001475611.1 | PHD finger protein 6 ( <i>Phf6</i> )                                                                | 0.61 |
| <i>Phlda1</i>   | XM_001475801.1 | pleckstrin homology-like domain, family A, member 1 ( <i>Phlda1</i> )                               | 0.41 |
| <i>Phft2</i>    | XM_001475830.1 | putative homeodomain transcription factor 2 ( <i>Phft2</i> )                                        | 0.60 |
| <i>Pi4ka</i>    | XM_001476721.1 | phosphatidylinositol 4-kinase, catalytic, alpha polypeptide ( <i>Pi4ka</i> )                        | 0.58 |
| <i>Picalm</i>   | XM_001476728.1 |                                                                                                     | 0.60 |
| <i>Pif1</i>     | XM_001475765.1 | PIF1 5'-to-3' DNA helicase homolog ( <i>S. cerevisiae</i> ) ( <i>Pif1</i> )                         | 0.39 |
| <i>Piga</i>     | XM_001476780.1 | phosphatidylinositol glycan anchor biosynthesis, class A ( <i>Piga</i> )                            | 0.63 |

|                 |                |                                                                                                        |      |
|-----------------|----------------|--------------------------------------------------------------------------------------------------------|------|
| <i>Pih1d1</i>   | XM_001476909.1 | PIH1 domain containing 1 (Pih1d1)                                                                      | 0.65 |
| <i>Pip4k2b</i>  | XM_001476916.1 | phosphatidylinositol-5-phosphate 4-kinase, type II, beta (Pip4k2b)                                     | 0.56 |
| <i>Pitpnb</i>   | XM_001477026.1 | phosphatidylinositol transfer protein, beta (Pitpnb)                                                   | 0.63 |
| <i>Pitrm1</i>   | XM_001477492.1 | pitrilysin metallopeptidase 1 (Pitrm1)                                                                 | 0.63 |
| <i>Pja1</i>     | XM_001477537.1 |                                                                                                        | 0.58 |
| <i>Pja2</i>     | XM_001477568.1 | praja 2, RING-H2 motif containing (Pja2), transcript variant 2                                         | 0.57 |
| <i>Pkd1</i>     | XM_001477596.1 | polycystic kidney disease 1 homolog (Pkd1)                                                             | 0.66 |
| <i>Pkia</i>     | XR_033770.1    | protein kinase inhibitor, alpha (Pkia)                                                                 | 0.62 |
| <i>Pkm2</i>     | XM_001477665.1 |                                                                                                        | 0.43 |
| <i>Pkn2</i>     | XR_033502.1    | protein kinase N2 (Pkn2)                                                                               | 0.65 |
| <i>Pla2g12a</i> | XR_033381.1    | phospholipase A2, group X1IA (Pla2g12a), transcript variant 1                                          | 0.63 |
| <i>Plaa</i>     | XM_001477759.1 | phospholipase A2, activating protein (Plaa)                                                            | 0.61 |
| <i>Pld1</i>     | XM_001477774.1 |                                                                                                        | 0.52 |
| <i>Plekha8</i>  | XM_001477963.1 | pleckstrin homology domain containing, family A (phosphoinositide binding specific) member 8 (Plekha8) | 0.61 |
| <i>Plekhk1</i>  | XM_001478437.1 |                                                                                                        | 0.28 |
| <i>Plk1</i>     | XR_033484.1    | polo-like kinase 1 (Drosophila) (Plk1)                                                                 | 0.11 |
| <i>Plk2</i>     | XR_033736.1    | polo-like kinase 2 (Drosophila) (Plk2)                                                                 | 0.21 |
| <i>Plk4</i>     | XR_032896.1    |                                                                                                        | 0.57 |
| <i>Plvap</i>    | XM_001478602.1 | plasmalemma vesicle associated protein (Plvap)                                                         | 0.15 |
| <i>Plxna2</i>   | XM_001478657.1 | plexin A2 (Plxna2)                                                                                     | 0.59 |
| <i>Pml</i>      | XM_001478724.1 | promyelocytic leukemia (Pml), transcript variant 1                                                     | 0.61 |
| <i>Pmp22</i>    | XM_001478788.1 | peripheral myelin protein 22 (Pmp22)                                                                   | 0.38 |
| <i>Pno1</i>     | XM_001479214.1 | partner of NOB1 homolog (S. cerevisiae) (Pno1)                                                         | 0.46 |
| <i>Pola2</i>    | XM_001478835.1 | polymerase (DNA directed), alpha 2 (Pola2)                                                             | 0.66 |
| <i>Pold1</i>    | XM_001479392.1 | polymerase (DNA directed), delta 1, catalytic subunit (Pold1)                                          | 0.29 |
| <i>Pold2</i>    | XM_001479068.1 | polymerase (DNA directed), delta 2, regulatory subunit (Pold2)                                         | 0.51 |
| <i>Pold4</i>    | XM_001478074.1 |                                                                                                        | 0.55 |
| <i>Pole</i>     | XR_033756.1    | polymerase (DNA directed), epsilon (Pole)                                                              | 0.45 |
| <i>Pole4</i>    | XR_033905.1    | polymerase (DNA-directed), epsilon 4 (p12 subunit) (Pole4)                                             | 0.60 |
| <i>Polg</i>     | XM_001479497.1 | polymerase (DNA directed), gamma (Polg)                                                                | 0.65 |
| <i>Polr1a</i>   | XR_034387.1    | polymerase (RNA) I polypeptide A (Polr1a)                                                              | 0.58 |
| <i>Polr1d</i>   | XM_001480136.1 | polymerase (RNA) I polypeptide D (Polr1d), transcript variant 1                                        | 0.61 |
| <i>Polr1e</i>   | XR_034509.1    | polymerase (RNA) I polypeptide E (Polr1e)                                                              | 0.58 |
| <i>Polr2a</i>   | XM_001480186.1 |                                                                                                        | 0.59 |
| <i>Polr2g</i>   | XM_001480467.1 | polymerase (RNA) II (DNA directed) polypeptide G (Polr2g)                                              | 0.66 |
| <i>Polr2h</i>   | XM_001480451.1 | polymerase (RNA) II (DNA directed) polypeptide H (Polr2h)                                              | 0.64 |
| <i>Polr3k</i>   | XM_001480453.1 | polymerase (RNA) III (DNA directed) polypeptide K (Polr3k)                                             | 0.53 |
| <i>Pomt2</i>    | XM_001480806.1 | protein-O-mannosyltransferase 2 (Pomt2)                                                                | 0.63 |
| <i>Pop5</i>     | XM_001480785.1 | processing of precursor 5, ribonuclease P/MRP family (S. cerevisiae) (Pop5)                            | 0.57 |
| <i>Por</i>      | XM_001480380.1 | P450 (cytochrome) oxidoreductase (Por)                                                                 | 0.60 |
| <i>Pou3f1</i>   | XM_001480791.1 | POU domain, class 3, transcription factor 1 (Pou3f1)                                                   | 0.20 |
| <i>Ppa1</i>     | XM_001471617.1 | pyrophosphatase (inorganic) 1 (Ppa1)                                                                   | 0.43 |
| <i>Ppa2</i>     | XM_137003.2    | pyrophosphatase (inorganic) 2 (Ppa2), nuclear gene encoding mitochondrial protein                      | 0.56 |
| <i>Ppan</i>     | XM_125952.4    |                                                                                                        | 0.42 |
| <i>Ppargc1a</i> | XM_122711.2    | peroxisome proliferative activated receptor, gamma, coactivator 1 alpha (Ppargc1a)                     | 0.58 |
| <i>Ppat</i>     | XM_139078.2    | PREDICTED: phosphoribosyl pyrophosphate amidotransferase, transcript variant 8 (Ppat)                  | 0.59 |
| <i>Ppia</i>     | XM_122761.3    | peptidylprolyl isomerase A (Ppia)                                                                      | 0.43 |
| <i>Ppib</i>     | XM_140116.1    | peptidylprolyl isomerase B (Ppib)                                                                      | 0.44 |
| <i>Ppic</i>     | XR_031257.1    | peptidylprolyl isomerase C (Ppic)                                                                      | 0.65 |
| <i>Ppid</i>     | XM_129460.4    |                                                                                                        | 0.58 |
| <i>Ppif</i>     | XM_124173.2    | peptidylprolyl isomerase F (cyclophilin F) (Ppif), nuclear gene encoding mitochondrial protein         | 0.43 |
| <i>Ppih</i>     | XM_124269.2    |                                                                                                        | 0.56 |
| <i>Ppm1b</i>    | XM_124427.4    | protein phosphatase 1B, magnesium dependent, beta isoform (Ppm1b)                                      | 0.62 |
| <i>Ppm1g</i>    | XR_002491.1    | protein phosphatase 1G (formerly 2C), magnesium-dependent, gamma isoform (Ppm1g)                       | 0.61 |
| <i>Ppp1ca</i>   | XM_124826.2    | protein phosphatase 1, catalytic subunit, alpha isoform (Ppp1ca)                                       | 0.63 |
| <i>Ppp1r12a</i> | XM_124858.2    | protein phosphatase 1, regulatory (inhibitor) subunit 12A (Ppp1r12a)                                   | 0.53 |
| <i>Ppp1r14b</i> | XM_145374.2    |                                                                                                        | 0.39 |
| <i>Ppp1r8</i>   | XR_001889.1    | protein phosphatase 1, regulatory (inhibitor) subunit 8 (Ppp1r8)                                       | 0.64 |
| <i>Ppp2cb</i>   | XM_137226.3    | protein phosphatase 2 (formerly 2A), catalytic subunit, beta isoform (Ppp2cb)                          | 0.61 |
| <i>Ppp2r5c</i>  | XM_111221.4    | protein phosphatase 2, regulatory subunit B (B56), gamma isoform (Ppp2r5c), transcript variant 3       | 0.41 |
| <i>Ppp3ca</i>   | XM_138902.2    | protein phosphatase 3, catalytic subunit, alpha isoform (Ppp3ca)                                       | 0.66 |
| <i>Ppp3cb</i>   | XM_917314.2    |                                                                                                        | 0.47 |

|                 |             |                                                                                             |      |
|-----------------|-------------|---------------------------------------------------------------------------------------------|------|
| <i>Ppp3r1</i>   | XM_142236.4 | protein phosphatase 3, regulatory subunit B, alpha isoform (calcineurin B, type I) (Ppp3r1) | 0.63 |
| <i>Ppp6c</i>    | XM_147335.2 | protein phosphatase 6, catalytic subunit (Ppp6c)                                            | 0.60 |
| <i>Pprc1</i>    | XM_195821.2 | peroxisome proliferative activated receptor, gamma, coactivator-related 1 (Pprc1)           | 0.54 |
| <i>Prc1</i>     | XM_193742.2 | protein regulator of cytokinesis 1 (Prc1)                                                   | 0.06 |
| <i>Prpc</i>     | XM_193262.3 | prolylcarboxypeptidase (angiotensinase C) (Prpc)                                            | 0.33 |
| <i>Prdx4</i>    | XM_193374.2 | peroxiredoxin 4 (Prdx4)                                                                     | 0.48 |
| <i>Prep</i>     | XM_193524.2 | prolyl endopeptidase (Prep)                                                                 | 0.46 |
| <i>Prkaca</i>   | XM_195069.2 | protein kinase, cAMP dependent, catalytic, alpha (Prkaca)                                   | 0.49 |
| <i>Prkacb</i>   | XM_195066.3 | protein kinase, cAMP dependent, catalytic, beta (Prkacb)                                    | 0.63 |
| <i>Prkar1a</i>  | XM_195399.2 | protein kinase, cAMP dependent regulatory, type I, alpha (Prkar1a)                          | 0.66 |
| <i>Prkar2b</i>  | XM_204210.2 | protein kinase, cAMP dependent regulatory, type II beta (Prkar2b)                           | 0.55 |
| <i>Prkcb</i>    | XM_207178.1 | protein kinase C, beta (Prkcb)                                                              | 0.09 |
| <i>Prkcbp1</i>  | XM_282724.2 | protein kinase C binding protein 1 (Prkcbp1)                                                | 0.61 |
| <i>Prkcsh</i>   | XM_287286.2 | protein kinase C substrate 80K-H (Prkcsh)                                                   | 0.60 |
| <i>Prkd3</i>    | XM_284573.2 | protein kinase D3 (Prkd3)                                                                   | 0.61 |
| <i>Prmt3</i>    | XM_284733.2 | protein arginine N-methyltransferase 3 (Prmt3)                                              | 0.58 |
| <i>Prmt5</i>    | XM_284853.2 | protein arginine N-methyltransferase 5 (Prmt5)                                              | 0.60 |
| <i>Prmt7</i>    | XR_032458.1 | protein arginine N-methyltransferase 7 (Prmt7)                                              | 0.47 |
| <i>Prokr1</i>   | XM_354560.1 | prokineticin receptor 1 (Prokr1)                                                            | 0.51 |
| <i>Prpf19</i>   | XM_354604.1 | PRP19/PSO4 pre-mRNA processing factor 19 homolog (S. cerevisiae) (Prpf19)                   | 0.58 |
| <i>Prpf38a</i>  | XM_354622.1 | PRP38 pre-mRNA processing factor 38 (yeast) domain containing A (Prpf38a)                   | 0.52 |
| <i>Prr18</i>    | XM_354834.1 | proline rich region 18 (Prr18)                                                              | 0.49 |
| <i>Prrc1</i>    | XM_358467.1 | proline-rich coiled-coil 1 (Prrc1)                                                          | 0.58 |
| <i>Prss35</i>   | XM_354911.1 | protease, serine, 35 (Prss35)                                                               | 0.27 |
| <i>Psip1</i>    | XM_354963.1 | PC4 and SFRS1 interacting protein 1 (Psip1)                                                 | 0.61 |
| <i>Psm5</i>     | XM_355032.1 | proteasome (prosome, macropain) subunit, alpha type 5 (Psm5)                                | 0.56 |
| <i>Psm7</i>     | XM_355049.1 | proteasome (prosome, macropain) subunit, alpha type 7 (Psm7)                                | 0.52 |
| <i>Psm1</i>     | XM_355056.1 | proteasome (prosome, macropain) subunit, beta type 1 (Psm1)                                 | 0.62 |
| <i>Psm10</i>    | XM_355149.1 | proteasome (prosome, macropain) subunit, beta type 10 (Psm10)                               | 0.50 |
| <i>Psm2</i>     | XM_355167.1 | proteasome (prosome, macropain) subunit, beta type 2 (Psm2)                                 | 0.65 |
| <i>Psm3</i>     | XM_355202.1 | proteasome (prosome, macropain) subunit, beta type 3 (Psm3)                                 | 0.63 |
| <i>Psm4</i>     | XM_355288.1 | proteasome (prosome, macropain) subunit, beta type 4 (Psm4)                                 | 0.59 |
| <i>Psm5</i>     | XM_355330.1 | proteasome (prosome, macropain) subunit, beta type 5 (Psm5)                                 | 0.55 |
| <i>Psm6</i>     | XM_355356.1 | proteasome (prosome, macropain) subunit, beta type 6 (Psm6)                                 | 0.66 |
| <i>Psm7</i>     | XM_355403.1 | proteasome (prosome, macropain) subunit, beta type 7 (Psm7)                                 | 0.55 |
| <i>Psm1</i>     | XM_355526.1 |                                                                                             | 0.53 |
| <i>Psm2</i>     | XM_355612.1 | proteasome (prosome, macropain) 26S subunit, ATPase 2 (Psm2)                                | 0.61 |
| <i>Psm3ip</i>   | XM_355721.1 | proteasome (prosome, macropain) 26S subunit, ATPase 3, interacting protein (Psm3ip)         | 0.52 |
| <i>Psm4</i>     | XM_355801.1 | proteasome (prosome, macropain) 26S subunit, ATPase, 4 (Psm4)                               | 0.63 |
| <i>Psm5</i>     | XM_355809.1 | protease (prosome, macropain) 26S subunit, ATPase 5 (Psm5)                                  | 0.63 |
| <i>Psm12</i>    | XM_355907.1 | proteasome (prosome, macropain) 26S subunit, non-ATPase, 12 (Psm12)                         | 0.50 |
| <i>Psm14</i>    | XM_355964.1 |                                                                                             | 0.62 |
| <i>Psm8</i>     | XM_358681.1 | proteasome (prosome, macropain) 26S subunit, non-ATPase, 8 (Psm8)                           | 0.57 |
| <i>Psm3</i>     | XM_356062.1 | proteaseome (prosome, macropain) 28 subunit, 3 (Psm3)                                       | 0.59 |
| <i>Ptcd2</i>    | XM_356141.1 | pentatricopeptide repeat domain 2 (Ptcd2)                                                   | 0.64 |
| <i>Pten</i>     | XM_356263.1 | phosphatase and tensin homolog (Pten)                                                       | 0.65 |
| <i>Ptk2</i>     | XM_356342.1 | PTK2 protein tyrosine kinase 2 (Ptk2)                                                       | 0.39 |
| <i>Ptn</i>      | XM_356731.1 | pleiotrophin (Ptn)                                                                          | 0.55 |
| <i>Ptpn12</i>   | XM_356798.1 | protein tyrosine phosphatase, non-receptor type 12 (Ptpn12)                                 | 0.63 |
| <i>Ptpro</i>    | XM_356873.1 | protein tyrosine phosphatase, receptor type, O (Ptpro)                                      | 0.31 |
| <i>Ptprz1</i>   | XM_356900.1 | protein tyrosine phosphatase, receptor type Z, polypeptide 1 (Ptprz1)                       | 0.46 |
| <i>Pum2</i>     | XM_356977.1 | pumilio 2 (Drosophila) (Pum2)                                                               | 0.64 |
| <i>Pus7l</i>    | XM_356987.1 | pseudouridylate synthase 7 homolog (S. cerevisiae)-like (Pus7l)                             | 0.48 |
| <i>Pus1</i>     | XM_357315.1 | PREDICTED: pseudouridylate synthase-like 1, transcript variant 1 (Pus1)                     | 0.58 |
| <i>Pvrl3</i>    | XM_357338.1 | poliovirus receptor-related 3 (Pvrl3), transcript variant alpha                             | 0.62 |
| <i>Pycr2</i>    | XM_357429.1 | pyrroline-5-carboxylate reductase family, member 2 (Pycr2)                                  | 0.59 |
| <i>Qpct</i>     | XM_357488.1 | glutaminyl-peptide cyclotransferase (glutaminyl cyclase) (Qpct)                             | 0.55 |
| <i>Qrs1</i>     | XM_357823.1 | glutaminyl-tRNA synthase (glutamine-hydrolyzing)-like 1 (Qrs1)                              | 0.55 |
| <i>Rab26</i>    | XM_358153.1 | PREDICTED: RAB26, member RAS oncogene family, transcript variant 1 (Rab26)                  | 0.06 |
| <i>Rab34</i>    | XM_358163.1 | RAB34, member of RAS oncogene family (Rab34)                                                | 0.56 |
| <i>Rab35</i>    | XM_358915.1 | RAB35, member RAS oncogene family (Rab35)                                                   | 0.51 |
| <i>Rab3a</i>    | XM_358960.1 | RAB3A, member RAS oncogene family (Rab3a)                                                   | 0.47 |
| <i>Rab3b</i>    | XM_358981.1 |                                                                                             | 0.37 |
| <i>Rab3gap2</i> | XR_034995.1 | PREDICTED: RAB3 GTPase activating protein subunit 2, transcript variant 4 (Rab3gap2)        | 0.52 |
| <i>Rab5c</i>    | XM_359014.1 | RAB5C, member RAS oncogene family (Rab5c)                                                   | 0.59 |
| <i>Rab8b</i>    | XM_359028.1 | RAB8B, member RAS oncogene family (Rab8b)                                                   | 0.38 |
| <i>Rabggtb</i>  | XM_359031.1 | RAB geranylgeranyl transferase, b subunit (Rabggtb)                                         | 0.54 |

|                 |                |                                                                                         |      |
|-----------------|----------------|-----------------------------------------------------------------------------------------|------|
| <i>Rabif</i>    | XM_359035.1    | RAB interacting factor (Rabif)                                                          | 0.63 |
| <i>Rad51</i>    | XM_359058.1    | RAD51 homolog (S. cerevisiae) (Rad51)                                                   | 0.57 |
| <i>Rad51c</i>   | XM_359091.1    | Rad51 homolog c (S. cerevisiae) (Rad51c)                                                | 0.48 |
| <i>Rad54l</i>   | XM_359123.1    | RAD54 like (S. cerevisiae) (Rad54l)                                                     | 0.56 |
| <i>Raet1b</i>   | XM_359142.1    | retinoic acid early transcript beta (Raet1b)                                            | 0.36 |
| <i>Rag1ap1</i>  | XM_359148.1    | recombination activating gene 1 activating protein 1 (Rag1ap1)                          | 0.64 |
| <i>Rai12</i>    | XM_359163.1    | retinoic acid induced 12 (Rai12)                                                        | 0.65 |
| <i>Raly</i>     | XM_359184.1    | hnRNP-associated with lethal yellow (Raly)                                              | 0.34 |
| <i>Ramp2</i>    | XM_917865.2    | receptor (calcitonin) activity modifying protein 2 (Ramp2)                              | 0.65 |
| <i>Ran</i>      | XM_906947.2    | RAN, member RAS oncogene family (Ran)                                                   | 0.57 |
| <i>Ranbp1</i>   | XM_001475733.1 | RAN binding protein 1 (Ranbp1)                                                          | 0.36 |
| <i>Rangap1</i>  | XM_485435.3    |                                                                                         | 0.44 |
| <i>Rangrf</i>   | XR_034042.1    | RAN guanine nucleotide release factor (Rangrf)                                          | 0.50 |
| <i>Rap1b</i>    | XR_033167.1    | RAS related protein 1b (Rap1b)                                                          | 0.50 |
| <i>Rap2c</i>    | NR_002889.1    | RAP2C, member of RAS oncogene family (Rap2c)                                            | 0.29 |
| <i>Rars</i>     | XR_034542.1    | arginyl-tRNA synthetase (Rars)                                                          | 0.66 |
| <i>Rasa3</i>    | XM_619824.4    | RAS p21 protein activator 3 (Rasa3)                                                     | 0.33 |
| <i>Rasal2</i>   | XR_034790.1    | RAS protein activator like 2 (Rasal2)                                                   | 0.61 |
| <i>Rassf3</i>   | XR_031536.1    | Ras association (RalGDS/AF-6) domain family member 3 (Rassf3)                           | 0.18 |
| <i>Rbbp4</i>    | XR_032410.1    | retinoblastoma binding protein 4 (Rbbp4)                                                | 0.64 |
| <i>Rbbp7</i>    | XR_031862.1    | retinoblastoma binding protein 7 (Rbbp7)                                                | 0.57 |
| <i>Rbl1</i>     | XR_004752.1    | retinoblastoma-like 1 (p107) (Rbl1)                                                     | 0.39 |
| <i>Rbm13</i>    | XR_033501.1    | RNA binding motif protein 13 (Rbm13)                                                    | 0.37 |
| <i>Rbm15</i>    | XM_001480472.1 |                                                                                         | 0.61 |
| <i>Rbms3</i>    | XR_033663.1    | RNA binding motif, single stranded interacting protein (Rbms3)                          | 0.55 |
| <i>Rbmx</i>     | XM_904332.3    | RNA binding motif protein, X chromosome (Rbmx)                                          | 0.31 |
| <i>Rbx1</i>     | XR_001819.2    | ring-box 1 (Rbx1)                                                                       | 0.60 |
| <i>Rcc1</i>     | XR_030945.1    | regulator of chromosome condensation 1 (Rcc1)                                           | 0.54 |
| <i>Rcl1</i>     | XR_031205.1    | RNA terminal phosphate cyclase-like 1 (Rcl1)                                            | 0.63 |
| <i>Rdh11</i>    | XM_906862.3    |                                                                                         | 0.53 |
| <i>Reps1</i>    | XR_031426.1    | RalBP1 associated Eps domain containing protein (Reps1)                                 | 0.52 |
| <i>Rerg</i>     | XM_921371.2    | RAS-like, estrogen-regulated, growth-inhibitor (Rerg)                                   | 0.35 |
| <i>Rev3l</i>    | XM_907756.3    | REV3-like, catalytic subunit of DNA polymerase zeta RAD54 like (S. cerevisiae) (Rev3l)  | 0.59 |
| <i>Rfc1</i>     | XR_003906.1    | replication factor C (activator 1) 1 (Rfc1)                                             | 0.67 |
| <i>Rfc2</i>     | XM_915945.3    | replication factor C (activator 1) 2 (Rfc2)                                             | 0.60 |
| <i>Rfc3</i>     | XM_915073.1    |                                                                                         | 0.65 |
| <i>Rfc4</i>     | XM_915139.3    |                                                                                         | 0.33 |
| <i>Rfc5</i>     | XM_916567.2    | replication factor C (activator 1) 5 (Rfc5)                                             | 0.55 |
| <i>Rgl1</i>     | XM_925296.2    | ral guanine nucleotide dissociation stimulator,-like 1 (Rgl1)                           | 0.59 |
| <i>Rgs7</i>     | NR_002690.1    | regulator of G protein signaling 7 (Rgs7)                                               | 0.35 |
| <i>Rgs7bp</i>   | NR_002885.1    | regulator of G-protein signalling 7 binding protein (Rgs7bp)                            | 0.47 |
| <i>Rhbd1</i>    | NM_001081681.1 | rhomboid family 1 (Drosophila) (Rhbd1)                                                  | 0.59 |
| <i>Rhobtb2</i>  | XM_973311.2    | Rho-related BTB domain containing 2 (Rhobtb2)                                           | 0.58 |
| <i>Rhoc</i>     | XM_991641.1    | ras homolog gene family, member C (Rhoc)                                                | 0.57 |
| <i>Rhoj</i>     | XR_031650.1    | ras homolog gene family, member J (Rhoj)                                                | 0.64 |
| <i>Rhot2</i>    | XR_031476.1    | ras homolog gene family, member T2 (Rhot2), nuclear gene encoding mitochondrial protein | 0.64 |
| <i>Riok3</i>    | XR_031065.1    | RIO kinase 3 (yeast) (Riok3)                                                            | 0.63 |
| <i>Rn18s</i>    | XR_031145.1    | 18S RNA (Rn18s), non-coding RNA.                                                        | 0.28 |
| <i>Rnaseh2b</i> | XR_030655.1    | ribonuclease H2, subunit B (Rnaseh2b)                                                   | 0.57 |
| <i>Rnf14</i>    | XR_030797.1    | ring finger protein 14 (Rnf14)                                                          | 0.62 |
| <i>Rnf145</i>   | XR_032081.1    | ring finger protein 145 (Rnf145)                                                        | 0.65 |
| <i>Rnf26</i>    | XM_001480084.1 | ring finger protein 26 (Rnf26)                                                          | 0.42 |
| <i>Rnf4</i>     | XR_034201.1    | ring finger protein 4 (Rnf4)                                                            | 0.63 |
| <i>Rnf44</i>    | XM_001000226.2 | ring finger protein 44 (Rnf44)                                                          | 0.53 |
| <i>Rnps1</i>    | XR_031651.1    |                                                                                         | 0.54 |
| <i>Robo1</i>    | XR_034647.1    | roundabout homolog 1 (Drosophila) (Robo1)                                               | 0.40 |
| <i>Rpa3</i>     | XR_035016.1    | replication protein A3 (Rpa3)                                                           | 0.46 |
| <i>Rpl10a</i>   | XM_001003212.2 | ribosomal protein L10A (Rpl10a)                                                         | 0.48 |
| <i>Rpl12</i>    | XM_976371.1    | ribosomal protein L12 (Rpl12)                                                           | 0.30 |
| <i>Rpl13a</i>   | XM_987550.1    | ribosomal protein L13a (Rpl13a)                                                         | 0.26 |
| <i>Rpl18</i>    | XM_001479052.1 | ribosomal protein L18 (Rpl18)                                                           | 0.42 |
| <i>Rpl18a</i>   | XM_001473434.1 | Ribosomal protein L18A (Rpl18a)                                                         | 0.42 |
| <i>Rpl19</i>    | XM_993721.1    | ribosomal protein L19 (Rpl19)                                                           | 0.37 |
| <i>Rpl23</i>    | XM_980150.1    | ribosomal protein L23 (Rpl23)                                                           | 0.58 |
| <i>Rpl24</i>    | XR_005113.2    | ribosomal protein L24 (Rpl24)                                                           | 0.62 |
| <i>Rpl26</i>    | XM_001479274.1 | ribosomal protein L26 (Rpl26)                                                           | 0.49 |
| <i>Rpl27</i>    | XM_001481199.1 | ribosomal protein L27 (Rpl27)                                                           | 0.45 |
| <i>Rpl27a</i>   | XR_032773.1    | ribosomal protein L27a (Rpl27a)                                                         | 0.30 |
| <i>Rpl28</i>    | XM_985882.1    |                                                                                         | 0.43 |

|                      |                |                                                                               |      |
|----------------------|----------------|-------------------------------------------------------------------------------|------|
| <i>Rpl29</i>         | XM_001003712.1 | ribosomal protein L29 (Rpl29)                                                 | 0.41 |
| <i>Rpl3</i>          | XM_992449.1    | ribosomal protein L3 (Rpl3)                                                   | 0.64 |
| <i>Rpl30</i>         | XM_001003154.1 | ribosomal protein L30 (Rpl30)                                                 | 0.54 |
| <i>Rpl31</i>         | XR_034818.1    | ribosomal protein L31 (Rpl31)                                                 | 0.46 |
| <i>Rpl32</i>         | XM_001001408.2 |                                                                               | 0.42 |
| <i>Rpl34</i>         | XM_001001411.2 | ribosomal protein L34 (Rpl34), transcript variant 1                           | 0.54 |
| <i>Rpl35</i>         | XM_001004685.1 | ribosomal protein L35 (Rpl35)                                                 | 0.40 |
| <i>Rpl36a</i>        | XR_005046.1    | ribosomal protein L36a (Rpl36a)                                               | 0.37 |
| <i>Rpl36al</i>       | XM_001002943.1 | ribosomal protein L36a-like (Rpl36al)                                         | 0.42 |
| <i>Rpl37</i>         | XR_005062.2    | ribosomal protein L37 (Rpl37)                                                 | 0.57 |
| <i>Rpl38</i>         | XR_005084.2    | ribosomal protein L38 (Rpl38), transcript variant 1                           | 0.59 |
| <i>Rpl39</i>         | NM_008508.2    | ribosomal protein L39 (Rpl39)                                                 | 0.46 |
| <i>Rpl4</i>          | NM_008509.2    | ribosomal protein L4 (Rpl4)                                                   | 0.38 |
| <i>Rpl41</i>         | NM_008377.2    | ribosomal protein L41 (Rpl41)                                                 | 0.63 |
| <i>Rpl711</i>        | NM_172814.1    | ribosomal protein L7-like 1 (Rpl711)                                          | 0.65 |
| <i>Rpl9</i>          | NM_001081088.1 | ribosomal protein L9 (Rpl9)                                                   | 0.62 |
| <i>Rplp0</i>         | NM_001033371.2 | ribosomal protein, large, P0 (Rplp0)                                          | 0.52 |
| <i>Rplp1</i>         | NM_029044.2    | ribosomal protein, large, P1 (Rplp1)                                          | 0.51 |
| <i>Rplp2</i>         | XM_890234.2    | ribosomal protein, large P2 (Rplp2)                                           | 0.43 |
| <i>Rpn2</i>          | NM_133807.1    | ribophorin II (Rpn2)                                                          | 0.47 |
| <i>Rpp21</i>         | NM_177725.2    | ribonuclease P 21 subunit (human) (Rpp21)                                     | 0.60 |
| <i>Rprm</i>          | NM_008515.1    | reprimo, TP53 dependent G2 arrest mediator candidate (Rprm)                   | 0.40 |
| <i>Rps10</i>         | NM_008516.2    | ribosomal protein S10 (Rps10)                                                 | 0.50 |
| <i>Rps11</i>         | NM_178069.5    | ribosomal protein S11 (Rps11)                                                 | 0.52 |
| <i>Rps12</i>         | NM_026032.1    |                                                                               | 0.43 |
| <i>Rps13</i>         | NM_172947.1    | ribosomal protein S13 (Rps13)                                                 | 0.41 |
| <i>Rps15</i>         | NM_030597.2    | ribosomal protein S15 (Rps15)                                                 | 0.51 |
| <i>Rps16</i>         | NM_026309.1    | ribosomal protein S16 (Rps16)                                                 | 0.40 |
| <i>Rps19</i>         | NM_015816.1    | ribosomal protein S19 (Rps19)                                                 | 0.48 |
| <i>Rps2</i>          | NM_025520.2    | ribosomal protein S2 (Rps2)                                                   | 0.53 |
| <i>Rps21</i>         | NM_030145.2    | ribosomal protein S21 (Rps21)                                                 | 0.58 |
| <i>Rps24</i>         | NM_133939.1    | ribosomal protein S24 (Rps24), transcript variant 1                           | 0.61 |
| <i>Rps25</i>         | NM_146006.1    | ribosomal protein S25 (Rps25)                                                 | 0.45 |
| <i>Rps26</i>         | NM_206958.1    | ribosomal protein S26 (Rps26)                                                 | 0.40 |
| <i>Rps27a</i>        | NM_138680      | ribosomal protein S27a (Rps27a), transcript variant 2                         | 0.45 |
| <i>Rps27l</i>        | NM_178705.5    | ribosomal protein S27-like (Rps27l)                                           | 0.55 |
| <i>Rps29</i>         | NM_016753.4    | ribosomal protein S29 (Rps29)                                                 | 0.53 |
| <i>Rps3</i>          | NM_016923.1    |                                                                               | 0.49 |
| <i>Rps3a</i>         | NM_025281.2    | ribosomal protein S3a (Rps3a)                                                 | 0.56 |
| <i>Rps4x</i>         | NM_145100.3    | ribosomal protein S4, X-linked (Rps4x)                                        | 0.53 |
| <i>Rps5</i>          | NM_011942.1    | ribosomal protein S5 (Rps5)                                                   | 0.41 |
| <i>Rps6</i>          | NM_134147.3    | ribosomal protein S6 (Rps6)                                                   | 0.50 |
| <i>Rps6ka1</i>       | NM_019499.2    | ribosomal protein S6 kinase polypeptide 1 (Rps6ka1)                           | 0.61 |
| <i>Rps7</i>          | NM_025649.1    | ribosomal protein S7 (Rps7)                                                   | 0.48 |
| <i>Rps8</i>          | NM_019791.2    | ribosomal protein S8 (Rps8)                                                   | 0.49 |
| <i>Rps9</i>          | NM_023788.3    | ribosomal protein S9 (Rps9)                                                   | 0.62 |
| <i>Rrbp1</i>         | NM_026453.3    | ribosome binding protein 1 (Rrbp1), transcript variant 2                      | 0.23 |
| <i>Rrm1</i>          | NM_207237      |                                                                               | 0.33 |
| <i>Rrm2</i>          | NM_008549.1    | ribonucleotide reductase M2 (Rrm2)                                            | 0.30 |
| <i>Rrp12</i>         | NM_027288.2    | ribosomal RNA processing 12 homolog (S. cerevisiae) (Rrp12)                   | 0.66 |
| <i>Rrp15</i>         | NM_026160.3    | ribosomal RNA processing 15 homolog (S. cerevisiae) (Rrp15)                   | 0.54 |
| <i>Rrp1b</i>         | NM_023138.3    | ribosomal RNA processing 1 homolog B (S. cerevisiae) (Rrp1b)                  | 0.63 |
| <i>Rrp9</i>          | NM_008928.3    | RRP9, small subunit (SSU) processome component, homolog (yeast) (Rrp9)        | 0.63 |
| <i>Rsl1d1</i>        | NM_009157.2    | ribosomal L1 domain containing 1 (Rsl1d1)                                     | 0.49 |
| <i>Rtkn2</i>         | NM_022012.3    | rhotekin 2 (Rtkn2)                                                            | 0.54 |
| <i>Rtn3</i>          | NM_138667.2    |                                                                               | 0.55 |
| <i>Rtn4r11</i>       | NM_008696.2    | reticulum 4 receptor-like 1 (Rtn4r11)                                         | 0.57 |
| <i>Ruvb1</i>         | NM_178684.5    | RuvB-like protein 1 (Ruvb1)                                                   | 0.66 |
| <i>Ruvb2</i>         | NM_172632.2    | RuvB-like protein 2 (Ruvb2)                                                   | 0.53 |
| <i>Rwdd1</i>         | NM_027418.1    | RWD domain containing 1 (Rwdd1)                                               | 0.58 |
| <i>Rybp</i>          | NM_011162.2    | RING1 and YY1 binding protein (Rybp)                                          | 0.66 |
| <i>Ryk</i>           | NM_021921.2    | receptor-like tyrosine kinase (Ryk), transcript variant 2                     | 0.53 |
| <i>Saal1</i>         | NM_010838.2    | PREDICTED: serum amyloid A-like 1, transcript variant 1 (Saal1)               | 0.63 |
| <i>Sacm11</i>        | NM_010807.3    | SAC1 (suppressor of actin mutations 1, homolog)-like (S. cerevisiae) (Sacm11) | 0.43 |
| <i>Sae1</i>          | NM_008641.2    | SUMO1 activating enzyme subunit 1 (Sae1)                                      | 0.58 |
| <i>Sall3</i>         | NM_013592.2    | sal-like 3 (Drosophila) (Sall3)                                               | 0.65 |
| <i>Sap30</i>         | NM_013595.2    | sin3 associated polypeptide (Sap30)                                           | 0.42 |
| <i>Sart3</i>         | NM_020007.3    | squamous cell carcinoma antigen recognized by T-cells 3 (Sart3)               | 0.62 |
| <i>Sc4mol</i>        | NM_153546.3    | sterol-C4-methyl oxidase-like (Sc4mol)                                        | 0.31 |
| <i>Scd1</i>          | NM_026037.2    | stearoyl-Coenzyme A desaturase 1 (Scd1)                                       | 0.52 |
| <i>sci000118.1_0</i> | NM_139295.2    |                                                                               | 0.57 |

|                          |                |                                                                                                                                                   |      |
|--------------------------|----------------|---------------------------------------------------------------------------------------------------------------------------------------------------|------|
| <i>scI0001284.1_18</i>   | NM_008562.3    |                                                                                                                                                   | 0.61 |
| <i>scI0001849.1_2273</i> | NM_027290.1    |                                                                                                                                                   | 0.33 |
| <i>scI0001978.1_6</i>    | NM_008564.1    |                                                                                                                                                   | 0.59 |
| <i>scI0002315.1_12</i>   | NM_008563.2    |                                                                                                                                                   | 0.63 |
| <i>scI0002507.1_236</i>  | NM_008565.2    |                                                                                                                                                   | 0.60 |
| <i>scI0002624.1_576</i>  | NM_008566.2    |                                                                                                                                                   | 0.56 |
| <i>scI0002791.1_134</i>  | NM_008567.1    |                                                                                                                                                   | 0.65 |
| <i>scI0004020.1_31</i>   | NM_008568.2    |                                                                                                                                                   | 0.65 |
| <i>Scml4</i>             | NM_207010.1    | sex comb on midleg-like 4 ( <i>Drosophila</i> ) ( <i>Scml4</i> )                                                                                  | 0.48 |
| <i>Scoc</i>              | NM_008618.2    | short coiled-coil protein ( <i>Scoc</i> ), transcript variant 2                                                                                   | 0.55 |
| <i>Scye1</i>             | NM_029696.3    | small inducible cytokine subfamily E, member 1 ( <i>Scye1</i> )                                                                                   | 0.65 |
| <i>Sdc3</i>              | NM_008617.2    | syndecan 3 ( <i>Sdc3</i> )                                                                                                                        | 0.35 |
| <i>Sdhb</i>              | NM_138596.1    | succinate dehydrogenase complex, subunit B, iron sulfur (Ip) ( <i>Sdhb</i> ), nuclear gene encoding mitochondrial protein                         | 0.45 |
| <i>Sdhd</i>              | NM_008581      | succinate dehydrogenase complex, subunit D, integral membrane protein ( <i>Sdhd</i> ), nuclear gene encoding mitochondrial protein                | 0.60 |
| <i>Sdpr</i>              | NM_010790.2    | serum deprivation response ( <i>Sdpr</i> )                                                                                                        | 0.51 |
| <i>Sec11a</i>            | NM_008590.1    | SEC11 homolog A ( <i>S. cerevisiae</i> ) ( <i>Sec11a</i> )                                                                                        | 0.64 |
| <i>Sec11c</i>            | NM_175224.4    | SEC11 homolog C ( <i>S. cerevisiae</i> ) ( <i>Sec11c</i> )                                                                                        | 0.44 |
| <i>Sec13</i>             | NM_133719      | SEC13 homolog ( <i>S. cerevisiae</i> ) ( <i>Sec13</i> )                                                                                           | 0.54 |
| <i>Sec61g</i>            | NM_021554.2    | SEC61, gamma subunit ( <i>Sec61g</i> )                                                                                                            | 0.57 |
| <i>Sec63</i>             | NM_001029890.1 | SEC63-like ( <i>S. cerevisiae</i> ) ( <i>Sec63</i> )                                                                                              | 0.53 |
| <i>Seh1l</i>             | NM_008594      | SEH1-like ( <i>S. cerevisiae</i> ) ( <i>Seh1l</i> ), transcript variant 1                                                                         | 0.60 |
| <i>Sema3a</i>            | NM_001081279.1 | sema domain, immunoglobulin domain (Ig), short basic domain, secreted, (semaphorin) 3A ( <i>Sema3a</i> )                                          | 0.63 |
| <i>Sema5a</i>            | NM_024200.2    |                                                                                                                                                   | 0.56 |
| <i>Sept2</i>             | NM_145486.4    | septin 2 ( <i>Sept2</i> )                                                                                                                         | 0.60 |
| <i>Sept6</i>             | NM_010891.1    | septin 6 ( <i>Sept6</i> )                                                                                                                         | 0.57 |
| <i>Sept9</i>             | NM_011889.2    | septin 9 ( <i>Sept9</i> )                                                                                                                         | 0.13 |
| <i>Sept11</i>            | NM_019942.2    | septin 11 ( <i>Sept11</i> )                                                                                                                       | 0.38 |
| <i>Serbp1</i>            | NM_001081259.1 | Serpine1 mRNA binding protein 1 ( <i>Serbp1</i> )                                                                                                 | 0.49 |
| <i>Serf2</i>             | NM_011844.3    | small EDRK-rich factor 2 ( <i>Serf2</i> )                                                                                                         | 0.61 |
| <i>Serpine2</i>          | NM_019946.3    | serine (or cysteine) peptidase inhibitor, clade E, member 2 ( <i>Serpine2</i> )                                                                   | 0.49 |
| <i>Set</i>               | NM_019394      |                                                                                                                                                   | 0.60 |
| <i>Setd8</i>             | NM_026524.2    | SET domain containing (lysine methyltransferase) 8 ( <i>Setd8</i> )                                                                               | 0.66 |
| <i>Sf3a1</i>             | NM_010798.2    | splicing factor 3a, subunit 1 ( <i>Sf3a1</i> )                                                                                                    | 0.60 |
| <i>Sf3a3</i>             | XM_001000692.2 | splicing factor 3a, subunit 3 ( <i>Sf3a3</i> )                                                                                                    | 0.63 |
| <i>Sf3b3</i>             | NM_026472.3    | splicing factor 3b, subunit 3 ( <i>Sf3b3</i> )                                                                                                    | 0.51 |
| <i>Sf3b4</i>             | AK129109       | splicing factor 3b, subunit 4 ( <i>Sf3b4</i> )                                                                                                    | 0.51 |
| <i>Sf3b5</i>             | NM_021527.1    |                                                                                                                                                   | 0.64 |
| <i>Sfrs1</i>             | NM_021462.3    | splicing factor, arginine/serine-rich 1 (ASF/SF2) ( <i>Sfrs1</i> ), transcript variant 1                                                          | 0.55 |
| <i>Sfrs10</i>            | NM_001039684.2 | splicing factor, arginine/serine-rich 10 (transformer 2 homolog, <i>Drosophila</i> ) ( <i>Sfrs10</i> )                                            | 0.46 |
| <i>Sfrs11</i>            | NM_133241.2    | splicing factor, arginine/serine-rich 11 ( <i>Sfrs11</i> ), transcript variant 1                                                                  | 0.48 |
| <i>Sfrs2</i>             | NM_010801.1    | splicing factor, arginine/serine-rich 2 (SC-35) ( <i>Sfrs2</i> )                                                                                  | 0.39 |
| <i>Sfrs4</i>             | XM_485570      | splicing factor, arginine/serine-rich 4 (SRp75) ( <i>Sfrs4</i> )                                                                                  | 0.64 |
| <i>Sfrs9</i>             | NM_019914.3    | splicing factor, arginine/serine rich 9 ( <i>Sfrs9</i> )                                                                                          | 0.47 |
| <i>Sfxn1</i>             | NM_026178.2    | sideroflexin 1 ( <i>Sfxn1</i> )                                                                                                                   | 0.60 |
| <i>Sgk1</i>              | NM_175217.6    | serum/glucocorticoid regulated kinase 1 ( <i>Sgk1</i> )                                                                                           | 0.45 |
| <i>Sgk3</i>              | NM_008608.2    | serum/glucocorticoid regulated kinase 3 ( <i>Sgk3</i> ), transcript variant 1                                                                     | 0.64 |
| <i>Sgol1</i>             | NM_008609.3    | shugoshin-like 1 ( <i>S. pombe</i> ) ( <i>Sgol1</i> )                                                                                             | 0.51 |
| <i>Sgol2</i>             | NM_011846.4    | shugoshin-like 2 ( <i>S. pombe</i> ) ( <i>Sgol2</i> )                                                                                             | 0.34 |
| <i>Sgpp1</i>             | NM_008610.2    | sphingosine-1-phosphate phosphatase 1 ( <i>Sgpp1</i> )                                                                                            | 0.52 |
| <i>Sh3glb1</i>           | NM_010808.3    | SH3-domain GRB2-like B1 (endophilin) ( <i>Sh3glb1</i> )                                                                                           | 0.65 |
| <i>Sh3glb2</i>           | NM_008615.1    | SH3-domain GRB2-like endophilin B2 ( <i>Sh3glb2</i> )                                                                                             | 0.50 |
| <i>Sh3pxd2b</i>          | NM_029309.2    | SH3 and PX domains 2B ( <i>Sh3pxd2b</i> )                                                                                                         | 0.39 |
| <i>Shc1</i>              | NM_010820.2    | src homology 2 domain-containing transforming protein C1 ( <i>Shc1</i> )                                                                          | 0.66 |
| <i>Shmt1</i>             | NM_026758.3    |                                                                                                                                                   | 0.38 |
| <i>Sipa1l2</i>           | NM_001081323.1 | signal-induced proliferation-associated 1 like 2 ( <i>Sipa1l2</i> )                                                                               | 0.66 |
| <i>Siva1</i>             | NM_025837.2    | SIVA1, apoptosis-inducing factor ( <i>Siva1</i> )                                                                                                 | 0.48 |
| <i>Skil</i>              | NM_026530.5    | SKI-like ( <i>Skil</i> ), transcript variant 2                                                                                                    | 0.52 |
| <i>Skiv2l2</i>           | NM_019939.1    | superkiller viralicidic activity 2-like 2 ( <i>S. cerevisiae</i> ) ( <i>Skiv2l2</i> )                                                             | 0.50 |
| <i>Skp2</i>              | NM_033564.2    | S-phase kinase-associated protein 2 (p45) ( <i>Skp2</i> ), transcript variant 2                                                                   | 0.32 |
| <i>Slain2</i>            | NM_008624.3    | SLAIN motif family, member 2 ( <i>Slain2</i> )                                                                                                    | 0.65 |
| <i>Slc12a2</i>           | NM_018736.2    | solute carrier family 12, member 2 ( <i>Slc12a2</i> )                                                                                             | 0.62 |
| <i>Slc19a2</i>           | NM_026154.1    | solute carrier family 19 (thiamine transporter), member 2 ( <i>Slc19a2</i> )                                                                      | 0.57 |
| <i>Slc1a4</i>            | NM_027204.2    | solute carrier family 1 (glutamate/neutral amino acid transporter), member 4 ( <i>Slc1a4</i> )                                                    | 0.47 |
| <i>Slc25a11</i>          | AK003026       | solute carrier family 25 (mitochondrial carrier oxoglutarate carrier), member 11 ( <i>Slc25a11</i> ), nuclear gene encoding mitochondrial protein | 0.57 |

|                 |             |                                                                                                                                                    |      |
|-----------------|-------------|----------------------------------------------------------------------------------------------------------------------------------------------------|------|
| <i>Slc25a19</i> | NM_025301.1 | solute carrier family 25 (mitochondrial thiamine pyrophosphate carrier), member 19 (Slc25a19), nuclear gene encoding mitochondrial protein         | 0.64 |
| <i>Slc25a25</i> | NM_026310.3 | solute carrier family 25 (mitochondrial carrier, phosphate carrier), member 25 (Slc25a25), nuclear gene encoding mitochondrial protein             | 0.27 |
| <i>Slc25a3</i>  | NM_025302.3 | solute carrier family 25 (mitochondrial carrier, phosphate carrier), member 3 (Slc25a3)                                                            | 0.53 |
| <i>Slc25a38</i> | NM_025570.2 | solute carrier family 25, member 38 (Slc25a38)                                                                                                     | 0.61 |
| <i>Slc25a39</i> | NM_175001.2 | solute carrier family 25, member 39 (Slc25a39)                                                                                                     | 0.43 |
| <i>Slc25a5</i>  | NM_011288.1 | solute carrier family 25 (mitochondrial carrier, adenine nucleotide translocator), member 5 (Slc25a5), nuclear gene encoding mitochondrial protein | 0.59 |
| <i>Slc29a1</i>  | NM_053159.3 | solute carrier family 29 (nucleoside transporters), member 1 (Slc29a1)                                                                             | 0.53 |
| <i>Slc30a5</i>  | NM_027098.2 | solute carrier family 30 (zinc transporter), member 5 (Slc30a5)                                                                                    | 0.59 |
| <i>Slc30a7</i>  | NM_053162.2 | solute carrier family 30 (zinc transporter), member 7 (Slc30a7)                                                                                    | 0.65 |
| <i>Slc31a1</i>  | NM_025500.1 | solute carrier family 31, member 1 (Slc31a1)                                                                                                       | 0.56 |
| <i>Slc35c2</i>  | NM_024177.3 | solute carrier family 35, member C2 (Slc35c2)                                                                                                      | 0.53 |
| <i>Slc35e1</i>  | NM_010922.1 | solute carrier family 35, member E1 (Slc35e1)                                                                                                      | 0.58 |
| <i>Slc35f3</i>  | NM_053164.3 | solute carrier family 35, member F3 (Slc35f3)                                                                                                      | 0.51 |
| <i>Slc38a10</i> | NM_029017.1 | solute carrier family 38, member 10 (Slc38a10)                                                                                                     | 0.57 |
| <i>Slc39a6</i>  | NM_178603.4 | solute carrier family 39 (metal ion transporter), member 6 (Slc39a6)                                                                               | 0.56 |
| <i>Slc39a7</i>  | NM_026851.2 | solute carrier family 39 (zinc transporter), member 7 (Slc39a7), transcript variant 1                                                              | 0.65 |
| <i>Slc41a2</i>  | NM_026744.3 | solute carrier family 41, member 2 (Slc41a2)                                                                                                       | 0.52 |
| <i>Slc4a4</i>   | NM_025317.2 | solute carrier family 4 (anion exchanger), member 4 (Slc4a4)                                                                                       | 0.61 |
| <i>Slc4a7</i>   | NM_183086   |                                                                                                                                                    | 0.44 |
| <i>Slc4a8</i>   | NM_025440.2 | solute carrier family 4 (anion exchanger), member 8 (Slc4a8)                                                                                       | 0.60 |
| <i>Slc6a1</i>   | NM_025878.1 | solute carrier family 6 (neurotransmitter transporter, GABA), member 1 (Slc6a1)                                                                    | 0.64 |
| <i>Slc6a6</i>   | NM_026826.1 | solute carrier family 6 (neurotransmitter transporter, taurine), member 6 (Slc6a6)                                                                 | 0.26 |
| <i>Slimap</i>   | NM_080452.2 | sarcolemma associated protein (Slimap)                                                                                                             | 0.64 |
| <i>Slimo2</i>   | NM_024174.5 | slowmo homolog 2 (Drosophila) (Slimo2)                                                                                                             | 0.46 |
| <i>Sltm</i>     | NM_026080.2 | SAFB-like, transcription modulator (Sltm), transcript variant 1                                                                                    | 0.66 |
| <i>Smad3</i>    | NM_025434.2 |                                                                                                                                                    | 0.63 |
| <i>Smap2</i>    | NM_021556.3 | stromal membrane-associated GTPase-activating protein 2 (Smap2)                                                                                    | 0.62 |
| <i>Smc1a</i>    | NM_020560.1 | structural maintenance of chromosomes 1A (Smc1a)                                                                                                   | 0.59 |
| <i>Smn1</i>     | NM_145573.2 | survival motor neuron 1 (Smn1)                                                                                                                     | 0.52 |
| <i>Smtn</i>     | NM_025305.1 | smoothelin (Smtn)                                                                                                                                  | 0.33 |
| <i>Smyd2</i>    | NM_023514.3 | SET and MYND domain containing 2 (Smyd2)                                                                                                           | 0.63 |
| <i>Snappc4</i>  | NM_023536.2 | small nuclear RNA activating complex, polypeptide 4 (Snappc4)                                                                                      | 0.49 |
| <i>Snca</i>     | AK031365    | synuclein, alpha (Snca), transcript variant 2                                                                                                      | 0.49 |
| <i>Snora65</i>  | NM_144898.1 | small nucleolar RNA, H/ACA box 65 (Snora65) on chromosome 2.                                                                                       | 0.65 |
| <i>Snrpa</i>    | NM_010835.2 | small nuclear ribonucleoprotein polypeptide A (Snrpa), transcript variant 2                                                                        | 0.59 |
| <i>Snrpb</i>    | NM_008630.2 | small nuclear ribonucleoprotein B (Snrpb)                                                                                                          | 0.45 |
| <i>Snrpd1</i>   | NM_013603.1 | small nuclear ribonucleoprotein D1 (Snrpd1)                                                                                                        | 0.48 |
| <i>Snrpd2</i>   | NM_011842.3 | small nuclear ribonucleoprotein D2 (Snrpd2)                                                                                                        | 0.58 |
| <i>Snrpd3</i>   | NM_024433.1 | small nuclear ribonucleoprotein D3 (Snrpd3)                                                                                                        | 0.57 |
| <i>Snrpf</i>    | NM_173013.2 | PREDICTED: small nuclear ribonucleoprotein polypeptide F (Snrpf)                                                                                   | 0.37 |
| <i>Snx9</i>     | NM_144941.2 | sorting nexin 9 (Snx9)                                                                                                                             | 0.61 |
| <i>Socs5</i>    |             | suppressor of cytokine signaling 5 (Socs5)                                                                                                         | 0.36 |
| <i>Sod2</i>     | NM_019758.2 |                                                                                                                                                    | 0.56 |
| <i>Sorcs1</i>   |             | VPS10 domain receptor protein SORCS 1 (Sorcs1)                                                                                                     | 0.43 |
| <i>Sorcs2</i>   | NM_026002.4 | sorilin-related VPS10 domain containing receptor 2 (Sorcs2)                                                                                        | 0.59 |
| <i>Sox11</i>    |             |                                                                                                                                                    | 0.42 |
| <i>Sox5</i>     |             | SRY-box containing gene 5 (Sox5)                                                                                                                   | 0.61 |
| <i>Spag5</i>    | NM_008638   | sperm associated antigen 5 (Spag5)                                                                                                                 | 0.22 |
| <i>Spag7</i>    | NM_181409.2 | sperm associated antigen 7 (Spag7)                                                                                                                 | 0.63 |
| <i>Spast</i>    | NM_172958.3 | spastin (Spast)                                                                                                                                    | 0.61 |
| <i>Spata6</i>   | NM_023858.1 | spermatogenesis associated 6 (Spata6)                                                                                                              | 0.63 |
| <i>Spc25</i>    | NM_013604.1 | SPC25, NDC80 kinetochore complex component, homolog (S. cerevisiae) (Spc25)                                                                        | 0.29 |
| <i>Spcs3</i>    | NM_138656.1 | signal peptidase complex subunit 3 homolog (S. cerevisiae) (Spcs3)                                                                                 | 0.48 |
| <i>Specc1</i>   | NM_024263.3 | sperm antigen with calponin homology and coiled-coil domains 1 (Specc1)                                                                            | 0.45 |
| <i>Spg7</i>     | NM_016969.1 | spastic paraplegia 7 homolog (human) (Spg7), nuclear gene encoding mitochondrial protein                                                           | 0.64 |
| <i>Sphk1</i>    | NM_016776.2 | sphingosine kinase 1 (Sphk1), transcript variant 1                                                                                                 | 0.47 |
| <i>Spna2</i>    | NM_008652.2 |                                                                                                                                                    | 0.46 |
| <i>Spp1</i>     | NM_170671.1 | secreted phosphoprotein 1 (Spp1)                                                                                                                   | 0.26 |
| <i>Spred1</i>   | NM_010852.1 |                                                                                                                                                    | 0.45 |
| <i>Spry4</i>    | NM_177369.3 | sprouty homolog 4 (Drosophila) (Spry4)                                                                                                             | 0.31 |
| <i>Spsb4</i>    | NM_022410.1 | sp1A/ryanodine receptor domain and SOCS box containing 4 (Spsb4)                                                                                   | 0.23 |
| <i>Sqle</i>     | XM_977718.2 | squalene epoxidase (Sqle)                                                                                                                          | 0.50 |
| <i>Srebf2</i>   | NM_139300.3 | sterol regulatory element binding factor 2 (Srebf2)                                                                                                | 0.59 |

|                   |                |                                                                                                                             |      |
|-------------------|----------------|-----------------------------------------------------------------------------------------------------------------------------|------|
| <i>Srgap2</i>     | NM_010863.2    | PREDICTED: SLIT-ROBO Rho GTPase activating protein 2, transcript variant 3 (Srgap2)                                         | 0.61 |
| <i>Srm</i>        | NM_010864.2    | spermidine synthase (Srm)                                                                                                   | 0.41 |
| <i>Srpk1</i>      | NM_001039546.1 | serine/arginine-rich protein specific kinase 1 (Srpk1)                                                                      | 0.58 |
| <i>Srpr</i>       | NM_017479.2    | signal recognition particle receptor ('docking protein') (Srpr)                                                             | 0.63 |
| <i>Srprb</i>      | NM_008665.3    | signal recognition particle receptor, B subunit (Srprb)                                                                     | 0.64 |
| <i>Srm2</i>       | NM_001024917.1 | serine/arginine repetitive matrix 2 (Srm2)                                                                                  | 0.45 |
| <i>Ssbp4</i>      | AK050560       |                                                                                                                             | 0.48 |
| <i>Ssna1</i>      | NM_026526.2    | Sjogren's syndrome nuclear autoantigen 1 (Ssna1)                                                                            | 0.60 |
| <i>Ssr3</i>       | NM_008667.2    | signal sequence receptor, gamma (Ssr3)                                                                                      | 0.57 |
| <i>Ssrp1</i>      | NM_013608.2    | structure specific recognition protein 1 (Ssrp1)                                                                            | 0.63 |
| <i>Sssca1</i>     | NM_001037098.1 | Sjogren's syndrome/scleroderma autoantigen 1 homolog (human) (Sssca1)                                                       | 0.53 |
| <i>Ssu72</i>      | NM_013792.1    | Ssu72 RNA polymerase II CTD phosphatase homolog (yeast) (Ssu72)                                                             | 0.66 |
| <i>St13</i>       | NM_053179.3    | suppression of tumorigenicity 13 (St13)                                                                                     | 0.61 |
| <i>St3gal3</i>    | NM_015781.3    | ST3 beta-galactoside alpha-2,3-sialyltransferase 3 (St3gal3)                                                                | 0.61 |
| <i>St6gal1</i>    | NM_021432.2    | beta galactoside alpha 2,6 sialyltransferase 1 (St6gal1)                                                                    | 0.47 |
| <i>St6galnac5</i> | NM_053089.2    | ST6 (alpha-N-acetyl-neuraminyl-2,3-beta-galactosyl-1, 3)-N-acetylgalactosaminide alpha-2,6-sialyltransferase 5 (St6galnac5) | 0.62 |
| <i>Stab1</i>      | NM_027350.2    | stabilin 1 (Stab1)                                                                                                          | 0.37 |
| <i>Stag2</i>      | NM_016777.2    | stromal antigen 2 (Stag2), transcript variant 2                                                                             | 0.65 |
| <i>Stambpl1</i>   | NM_026425.1    | Stam binding protein like 1 (Stambpl1)                                                                                      | 0.35 |
| <i>Stard4</i>     | NM_173437      | StAR-related lipid transfer (START) domain containing 4 (Stard4)                                                            | 0.40 |
| <i>Stau2</i>      | NM_008675.1    | staufen (RNA binding protein) homolog 2 (Drosophila) (Stau2), transcript variant 3                                          | 0.65 |
| <i>Stc1</i>       | NM_007789.2    | stanniocalcin 1 (Stc1)                                                                                                      | 0.35 |
| <i>Stim2</i>      | NM_146171.1    | stromal interaction molecule 2 (Stim2)                                                                                      | 0.62 |
| <i>Stip1</i>      | NM_178113.2    | stress-induced phosphoprotein 1 (Stip1)                                                                                     | 0.47 |
| <i>Stk17b</i>     | NM_144818.1    | serine/threonine kinase 17b (apoptosis-inducing) (Stk17b)                                                                   | 0.38 |
| <i>Strap</i>      | NM_011986.2    | serine/threonine kinase receptor associated protein (Strap)                                                                 | 0.58 |
| <i>Strn4</i>      | NM_010880.3    | striatin, calmodulin binding protein 4 (Strn4), transcript variant 1                                                        | 0.66 |
| <i>Stt3b</i>      | NM_021607.2    | STT3, subunit of the oligosaccharyltransferase complex, homolog B (S. cerevisiae) (Stt3b)                                   | 0.66 |
| <i>Stx4a</i>      | NM_023294.1    | syntaxin 4A (placental) (Stx4a)                                                                                             | 0.53 |
| <i>Stxbp1</i>     | NM_022996.1    | syntaxin binding protein 1 (Stxbp1)                                                                                         | 0.48 |
| <i>Suclg2</i>     | NM_008681.2    | succinate-Coenzyme A ligase, GDP-forming, beta subunit (Suclg2)                                                             | 0.66 |
| <i>Sulf2</i>      | NM_013864      | sulfatase 2 (Sulf2)                                                                                                         | 0.58 |
| <i>Sumo2</i>      | NM_008681      | SMT3 suppressor of mif two 3 homolog 2 (yeast) (Sumo2)                                                                      | 0.53 |
| <i>Sumo3</i>      | NM_025551.3    | SMT3 suppressor of mif two 3 homolog 3 (yeast) (Sumo3)                                                                      | 0.56 |
| <i>Supt3h</i>     | XM_001476048.1 | suppressor of Ty 3 homolog (S. cerevisiae) (Supt3h)                                                                         | 0.64 |
| <i>Supv311</i>    | NM_025348.1    | suppressor of var1, 3-like 1 (S. cerevisiae) (Supv311)                                                                      | 0.67 |
| <i>Suz12</i>      | NM_010886.1    | suppressor of zeste 12 homolog (Drosophila) (Suz12)                                                                         | 0.50 |
| <i>Sv2a</i>       | NM_026614.2    | synaptic vesicle glycoprotein 2 a (Sv2a)                                                                                    | 0.39 |
| <i>Swap70</i>     | NM_025987.1    | SWA-70 protein (Swap70)                                                                                                     | 0.62 |
| <i>Syde1</i>      | NM_026703.2    | PREDICTED: synapse defective 1, Rho GTPase, homolog 1 (C. elegans) (Syde1)                                                  | 0.63 |
| <i>Syncrip</i>    | NM_025358.2    | synaptotagmin binding, cytoplasmic RNA interacting protein (Syncrip), transcript variant 2                                  | 0.59 |
| <i>Tada1l</i>     | XM_128594.4    | transcriptional adaptor 1 (HFI1 homolog, yeast) like (Tada1l)                                                               | 0.59 |
| <i>Taf10</i>      | NM_025597.2    | TAF10 RNA polymerase II, TATA box binding protein (TBP)-associated factor (Taf10)                                           | 0.52 |
| <i>Taf12</i>      | NM_025316.2    |                                                                                                                             | 0.56 |
| <i>Taf9</i>       | NM_001033305.2 | TAF9 RNA polymerase II, TATA box binding protein (TBP)-associated factor (Taf9), transcript variant 1                       | 0.49 |
| <i>Tagap</i>      | NM_026061.2    | T-cell activation Rho GTPase-activating protein (Tagap)                                                                     | 0.59 |
| <i>Tagln2</i>     | NM_025523.1    | transgelin 2 (Tagln2)                                                                                                       | 0.51 |
| <i>Tanc1</i>      | NM_024220.1    | tetratricopeptide repeat, ankyrin repeat and coiled-coil containing 1 (Tanc1)                                               | 0.46 |
| <i>Tank</i>       | NM_153064.4    | TRAF family member-associated Nf-kappa B activator (Tank)                                                                   | 0.66 |
| <i>Tbc1d1</i>     | NM_026688.2    | TBC1 domain family, member 1 (Tbc1d1)                                                                                       | 0.40 |
| <i>Tbca</i>       | NM_010887.1    | tubulin cofactor a (Tbca)                                                                                                   | 0.60 |
| <i>Tbrg4</i>      | NM_029272.3    | transforming growth factor beta regulated gene 4 (Tbrg4)                                                                    | 0.39 |
| <i>Tceal8</i>     | NM_144870.4    | transcription elongation factor A (SII)-like 8 (Tceal8)                                                                     | 0.66 |
| <i>Tcerg1</i>     | NM_133666.2    | transcription elongation regulator 1 (CA150) (Tcerg1)                                                                       | 0.52 |
| <i>Tcf12</i>      | NM_028388.1    | transcription factor 12 (Tcf12)                                                                                             | 0.52 |
| <i>Tcf4</i>       | NM_026267.1    | transcription factor 4 (Tcf4), transcript variant 1                                                                         | 0.60 |
| <i>Tcn2</i>       | NM_008682      | transcobalamin 2 (Tcn2)                                                                                                     | 0.64 |
| <i>Tcp1</i>       | NM_031881.1    | t-complex protein 1 (Tcp1)                                                                                                  | 0.37 |
| <i>Tead2</i>      | NM_017464.2    | TEA domain family member 2 (Tead2)                                                                                          | 0.45 |
| <i>Tfdp1</i>      | XM_973899.1    |                                                                                                                             | 0.48 |
| <i>Tfg</i>        | NM_011848.2    | Trk-fused gene (Tfg)                                                                                                        | 0.61 |
| <i>Tfrc</i>       | NM_177898.4    | transferrin receptor (Tfrc)                                                                                                 | 0.44 |



|                  |                |                                                                                                                                          |      |
|------------------|----------------|------------------------------------------------------------------------------------------------------------------------------------------|------|
| <i>Thap4</i>     | NM_145138.1    | THAP domain containing 4 (Thap4)                                                                                                         | 0.66 |
| <i>Them2</i>     | NM_016701.3    | thioesterase superfamily member 2 (Them2)                                                                                                | 0.65 |
| <i>Thoc4</i>     | NM_001081324.1 | THO complex 4 (Thoc4)                                                                                                                    | 0.35 |
| <i>Thoc7</i>     | NM_010893.2    | THO complex 7 homolog (Drosophila) (Thoc7), transcript variant 1                                                                         | 0.48 |
| <i>Thumpd1</i>   | NM_021360      | THUMP domain containing 1 (Thumpd1)                                                                                                      | 0.58 |
| <i>Thyn1</i>     | NM_010901.2    | thymocyte nuclear protein 1 (Thyn1)                                                                                                      | 0.54 |
| <i>Timeless</i>  | NM_177176.2    | timeless homolog (Drosophila) (Timeless), transcript variant 2                                                                           | 0.41 |
| <i>Timm10</i>    | NM_008687.2    | translocase of inner mitochondrial membrane 10 homolog (yeast) (Timm10)                                                                  | 0.56 |
| <i>Timm17a</i>   | NM_030612.2    | translocase of inner mitochondrial membrane 17a (Timm17a), nuclear gene enc                                                              | 0.44 |
| <i>Timm50</i>    | NM_019867      | translocase of inner mitochondrial membrane 50 homolog (yeast) (Timm50), nuc                                                             | 0.62 |
| <i>Timm8a1</i>   | NM_025811.1    | translocase of inner mitochondrial membrane 8 homolog a1 (yeast) (Timm8a1)                                                               | 0.49 |
| <i>Timm8b</i>    | NM_008695.2    | translocase of inner mitochondrial membrane 8 homolog b (yeast) (Timm8b)                                                                 | 0.50 |
| <i>Timm9</i>     | NM_025391.1    | translocase of inner mitochondrial membrane 9 homolog (yeast) (Timm9), nuclear gene encoding mitochondrial protein, transcript variant 1 | 0.54 |
| <i>Timp1</i>     | NM_025623.2    | tissue inhibitor of metalloproteinase 1 (Timp1), transcript variant 2                                                                    | 0.31 |
| <i>Timp4</i>     | AK036043       | tissue inhibitor of metalloproteinase 4 (Timp4)                                                                                          | 0.22 |
| <i>Tipin</i>     | NM_029891.2    | timeless interacting protein (Tipin)                                                                                                     | 0.41 |
| <i>Tk1</i>       | NM_010919.2    | thymidine kinase 1 (Tk1)                                                                                                                 | 0.19 |
| <i>Tlcd1</i>     | NM_008704.2    | TLC domain containing 1 (Tlcd1)                                                                                                          | 0.50 |
| <i>Tle2</i>      | NM_008705.4    | transducin-like enhancer of split 2, homolog of Drosophila E(spl) (Tle2)                                                                 | 0.57 |
| <i>Tle6</i>      | NM_019731.1    | transducin-like enhancer of split 6, homolog of Drosophila E(spl) (Tle6)                                                                 | 0.17 |
| <i>Tlk1</i>      | NM_080637.3    | tousled-like kinase 1 (Tlk1)                                                                                                             | 0.61 |
| <i>Tmed3</i>     | NM_138314.2    | transmembrane emp24 domain containing 3 (Tmed3)                                                                                          | 0.54 |
| <i>Tmed9</i>     | NM_026393.1    | transmembrane emp24 protein transport domain containing 9 (Tmed9)                                                                        | 0.59 |
| <i>Tmem109</i>   | NM_008707.3    | transmembrane protein 109 (Tmem109)                                                                                                      | 0.50 |
| <i>Tmem11</i>    | NM_021303.2    | transmembrane protein 11 (Tmem11)                                                                                                        | 0.49 |
| <i>Tmem126a</i>  | NM_153570.2    | transmembrane protein 126A (Tmem126a)                                                                                                    | 0.49 |
| <i>Tmem132a</i>  | NM_138747.1    | transmembrane protein 132A (Tmem132a)                                                                                                    | 0.39 |
| <i>Tmem147</i>   | NM_001008421.1 | transmembrane protein 147 (Tmem147)                                                                                                      | 0.66 |
| <i>Tmem14c</i>   | NM_018868.2    | transmembrane protein 14C (Tmem14c)                                                                                                      | 0.57 |
| <i>Tmem176a</i>  | NM_024193.2    | transmembrane protein 176A (Tmem176a)                                                                                                    | 0.23 |
| <i>Tmem176b</i>  | NM_026578.2    | transmembrane protein 176B (Tmem176b)                                                                                                    | 0.29 |
| <i>Tmem184b</i>  | NM_026631.3    | transmembrane protein 184b (Tmem184b)                                                                                                    | 0.56 |
| <i>Tmem185b</i>  | NM_025403.2    | transmembrane protein 185B (Tmem185b)                                                                                                    | 0.60 |
| <i>Tmem199</i>   | NM_153057.3    | transmembrane protein 199 (Tmem199)                                                                                                      | 0.58 |
| <i>Tmem41a</i>   | NM_020043.2    | transmembrane protein 41a (Tmem41a)                                                                                                      | 0.56 |
| <i>Tmem44</i>    | NM_028995.3    | transmembrane protein 44 (Tmem44)                                                                                                        | 0.43 |
| <i>Tmem48</i>    | NM_023409.4    | transmembrane protein 48 (Tmem48)                                                                                                        | 0.51 |
| <i>Tmem49</i>    | NM_008722.1    | transmembrane protein 49 (Tmem49)                                                                                                        | 0.41 |
| <i>Tmem55a</i>   | NM_008723.1    | transmembrane protein 55A (Tmem55a)                                                                                                      | 0.64 |
| <i>Tmem55b</i>   | NR_002702.1    | transmembrane protein 55b (Tmem55b)                                                                                                      | 0.48 |
| <i>Tmem56</i>    | NM_009145.1    | transmembrane protein 56 (Tmem56)                                                                                                        | 0.62 |
| <i>Tmem63b</i>   | NM_008730.2    | transmembrane protein 63b (Tmem63b)                                                                                                      | 0.51 |
| <i>Tmem68</i>    | NM_020282.2    | transmembrane protein 68 (Tmem68)                                                                                                        | 0.48 |
| <i>Tmem70</i>    | NM_001025587.1 | transmembrane protein 70 (Tmem70), transcript variant 1                                                                                  | 0.61 |
| <i>Tmem88</i>    | NM_010150.2    | transmembrane protein 88 (Tmem88)                                                                                                        | 0.56 |
| <i>Tmem97</i>    | NM_025980.2    | transmembrane protein 97 (Tmem97)                                                                                                        | 0.27 |
| <i>Tmpo</i>      | NM_144847.1    | thymopoietin (Tmpo), transcript variant 6                                                                                                | 0.62 |
| <i>Tmsb10</i>    | NM_176930.3    | thymosin, beta 10 (Tmsb10)                                                                                                               | 0.63 |
| <i>Tmsb4x</i>    | NM_146150.2    | thymosin, beta 4, X chromosome (Tmsb4x)                                                                                                  | 0.58 |
| <i>Tnc</i>       | NM_134122.2    | tenascin C (Tnc)                                                                                                                         | 0.04 |
| <i>Tnfaip8</i>   | NM_153529.1    | tumor necrosis factor, alpha-induced protein 8 (Tnfaip8)                                                                                 | 0.59 |
| <i>Tnfrsf10b</i> | NM_008737.1    | tumor necrosis factor receptor superfamily, member 10b (Tnfrsf10b)                                                                       | 0.62 |
| <i>Tnfrsf12a</i> | NM_172544.2    | tumor necrosis factor receptor superfamily, member 12a (Tnfrsf12a)                                                                       | 0.44 |
| <i>Tnfrsf21</i>  | NM_016710.2    | tumor necrosis factor receptor superfamily, member 21 (Tnfrsf21)                                                                         | 0.36 |
| <i>Tomm22</i>    | NM_010941.3    | translocase of outer mitochondrial membrane 22 homolog (yeast) (Tomm22), nuclear gene encoding mitochondrial protein                     | 0.55 |
| <i>Tomm40l</i>   | NM_011732      | translocase of outer mitochondrial membrane 40 homolog-like (yeast) (Tomm40l), nuclear gene encoding mitochondrial protein               | 0.54 |
| <i>Tomm70a</i>   | NM_198326.2    | translocase of outer mitochondrial membrane 70 homolog A (yeast) (Tomm70a)                                                               | 0.66 |
| <i>Top2a</i>     | NM_008741.1    | topoisomerase (DNA) II alpha (Top2a)                                                                                                     | 0.16 |
| <i>Tpi1</i>      | NM_015807.1    | triosephosphate isomerase 1 (Tpi1)                                                                                                       | 0.40 |
| <i>Tpm3</i>      | NM_027289.1    | tropomyosin 3, gamma (Tpm3)                                                                                                              | 0.39 |
| <i>Tpm4</i>      | NM_010946.2    | tropomyosin 4 (Tpm4)                                                                                                                     | 0.46 |
| <i>Tpr</i>       | NM_001025074.1 | translocated promoter region (Tpr)                                                                                                       | 0.64 |
| <i>Tpst1</i>     | NM_008747.2    | protein-tyrosine sulfotransferase 1 (Tpst1), transcript variant 2                                                                        | 0.61 |
| <i>Tpx2</i>      | NM_001004363.1 | TPX2, microtubule-associated protein homolog (Xenopus laevis) (Tpx2)                                                                     | 0.31 |
| <i>Traf3</i>     | NM_028778.3    | Tnf receptor-associated factor 3 (Traf3), transcript variant 1                                                                           | 0.58 |
| <i>Traf4</i>     | NM_011955.1    | Tnf receptor associated factor 4 (Traf4)                                                                                                 | 0.49 |
| <i>Trak2</i>     | NM_008749.1    | trafficking protein, kinesin binding 2 (Trak2)                                                                                           | 0.52 |
| <i>Tram1</i>     | NM_010948.1    | translocating chain-associating membrane protein 1 (Tram1)                                                                               | 0.55 |

|                  |                |                                                                                                     |      |
|------------------|----------------|-----------------------------------------------------------------------------------------------------|------|
| <i>Trap1</i>     | NM_001031664.1 | TNF receptor-associated protein 1 (Trap1)                                                           | 0.64 |
| <i>Trappc1</i>   | NM_033080.2    | trafficking protein particle complex 1 (Trappc1)                                                    | 0.63 |
| <i>Trappc4</i>   | NM_026623.3    | trafficking protein particle complex 4 (Trappc4)                                                    | 0.58 |
| <i>Trf</i>       | NM_016918.2    | transferrin (Trf)                                                                                   | 0.13 |
| <i>Trib2</i>     | NM_172288.1    |                                                                                                     | 0.31 |
| <i>Trim27</i>    | NM_021512.2    | tripartite motif-containing 27 (Trim27)                                                             | 0.65 |
| <i>Trim28</i>    | XM_133073.7    | tripartite motif protein 28 (Trim28)                                                                | 0.44 |
| <i>Trim59</i>    | NM_018815.1    | tripartite motif-containing 59 (Trim59)                                                             | 0.49 |
| <i>Trim62</i>    | NM_145706.1    | tripartite motif-containing 62 (Trim62)                                                             | 0.43 |
| <i>Trim8</i>     | NM_053074.1    | tripartite motif protein 8 (Trim8)                                                                  | 0.43 |
| <i>Trio</i>      | NM_001002929.3 |                                                                                                     | 0.57 |
| <i>Trip12</i>    | NM_172394.2    | thyroid hormone receptor interactor 12 (Trip12)                                                     | 0.58 |
| <i>Troap</i>     | NM_030250.1    | PREDICTED: trophinin associated protein (Troap)                                                     | 0.30 |
| <i>Trp53</i>     | NM_001042652.1 | transformation related protein 53 (Trp53)                                                           | 0.55 |
| <i>Trp53i11</i>  | NM_008750.4    | transformation related protein 53 inducible protein 11 (Trp53i11)                                   | 0.32 |
| <i>Trp53inp2</i> | NM_008751.2    | transformation related protein 53 inducible nuclear protein 2 (Trp53inp2)                           | 0.42 |
| <i>Tsen15</i>    | NM_019761.4    | tRNA splicing endonuclease 15 homolog (S. cerevisiae) (Tsen15)                                      | 0.67 |
| <i>Tsfm</i>      | NM_016978.1    | Ts translation elongation factor, mitochondrial (Tsfm), nuclear gene encoding mitochondrial protein | 0.65 |
| <i>Tsg101</i>    | NM_026950.3    | tumor susceptibility gene 101 (Tsg101)                                                              | 0.62 |
| <i>Tspan12</i>   | NM_011858.3    | tetraspanin 12 (Tspan12)                                                                            | 0.57 |
| <i>Tssc4</i>     | NM_010956.3    | tumor-suppressing subchromosomal transferable fragment 4 (Tssc4), transcript variant 2              | 0.58 |
| <i>Ttc3</i>      | NM_008760.2    | tetratricopeptide repeat domain 3 (Ttc3)                                                            | 0.66 |
| <i>Ttc7b</i>     | NM_139144.2    | PREDICTED: tetratricopeptide repeat domain 7B, transcript variant 1 (Ttc7b)                         | 0.51 |
| <i>Ttc9c</i>     | NM_025942.2    | tetratricopeptide repeat domain 9C (Ttc9c)                                                          | 0.63 |
| <i>Ttyh3</i>     | NM_173777.2    | tweety homolog 3 (Drosophila) (Ttyh3)                                                               | 0.46 |
| <i>Tuba6</i>     | NM_172907.2    |                                                                                                     | 0.36 |
| <i>Tubb5</i>     | NM_177068.3    | tubulin, beta 5 (Tubb5)                                                                             | 0.39 |
| <i>Tubb6</i>     | NM_016968.4    | tubulin, beta 6 (Tubb6)                                                                             | 0.26 |
| <i>Tubg1</i>     | NM_153122.2    | tubulin, gamma 1 (Tubg1)                                                                            | 0.43 |
| <i>Tufm</i>      | NM_010098.2    | Tu translation elongation factor, mitochondrial (Tufm), nuclear gene encoding mitochondrial protein | 0.56 |
| <i>Txn1</i>      | NM_011014.2    | thioredoxin 1 (Txn1)                                                                                | 0.28 |
| <i>Txndc12</i>   | NM_175423.3    | thioredoxin domain containing 12 (endoplasmic reticulum) (Txndc12)                                  | 0.47 |
| <i>Txn14</i>     | NM_011959.2    |                                                                                                     | 0.58 |
| <i>Txn14a</i>    | NM_019716.1    | thioredoxin-like 4A (Txn14a), transcript variant 2                                                  | 0.63 |
| <i>Tyms</i>      | NM_025661.3    | thymidylate synthase (Tyms)                                                                         | 0.34 |
| <i>Tyms-ps</i>   | NM_027881.1    | thymidylate synthase, pseudogene (Tyms-ps), non-coding RNA.                                         | 0.37 |
| <i>U2af1</i>     | NM_024289      |                                                                                                     | 0.63 |
| <i>U2af2</i>     | NM_145525.2    | U2 small nuclear ribonucleoprotein auxiliary factor (U2AF) 2 (U2af2)                                | 0.55 |
| <i>Uaca</i>      | NM_175489.3    | uveal autoantigen with coiled-coil domains and ankyrin repeats (Uaca)                               | 0.55 |
| <i>Uba1</i>      | NM_011019.1    | ubiquitin-like modifier activating enzyme 1 (Uba1)                                                  | 0.53 |
| <i>Uba2</i>      | NM_172416.2    | ubiquitin-like modifier activating enzyme 2 (Uba2)                                                  | 0.53 |
| <i>Ubap2</i>     | NM_024188.5    | ubiquitin-associated protein 2 (Ubap2)                                                              | 0.62 |
| <i>Ube2f</i>     | NM_130885.2    | ubiquitin-conjugating enzyme E2F (putative) (Ube2f)                                                 | 0.50 |
| <i>Ube2g1</i>    | NM_175116.2    | ubiquitin-conjugating enzyme E2G 1 (UBC7 homolog, C. elegans) (Ube2g1)                              | 0.63 |
| <i>Ube2k</i>     | NM_011032.2    | ubiquitin-conjugating enzyme E2K (UBC1 homolog, yeast) (Ube2k)                                      | 0.59 |
| <i>Ube2m</i>     | NM_011119.3    | ubiquitin-conjugating enzyme E2M (UBC12 homolog, yeast) (Ube2m)                                     | 0.60 |
| <i>Ube2q1</i>    | NM_130881.2    | ubiquitin-conjugating enzyme E2Q (putative) 1 (Ube2q1)                                              | 0.63 |
| <i>Ube2t</i>     | NM_027032.2    | ubiquitin-conjugating enzyme E2T (putative) (Ube2t)                                                 | 0.58 |
| <i>Ube3c</i>     | NM_001081170.1 | ubiquitin protein ligase E3C (Ube3c)                                                                | 0.64 |
| <i>Ubfd1</i>     | NM_008812.1    | ubiquitin family domain containing 1 (Ubfd1)                                                        | 0.66 |
| <i>Ubr7</i>      | NM_013625.1    | ubiquitin protein ligase E3 component n-recogin 7 (putative) (Ubr7)                                 | 0.58 |
| <i>Uchl5</i>     | NM_008776.1    | ubiquitin carboxyl-terminal esterase L5 (Uchl5)                                                     | 0.54 |
| <i>Uck2</i>      | NM_027470.3    | uridine-cytidine kinase 2 (Uck2)                                                                    | 0.35 |
| <i>Ugcg</i>      | XM_974900.1    |                                                                                                     | 0.53 |
| <i>Uhrf1</i>     | NM_023245.3    | ubiquitin-like, containing PHD and RING finger domains, 1 (Uhrf1)                                   | 0.12 |
| <i>Uhrf2</i>     | NM_023792.1    | ubiquitin-like, containing PHD and RING finger domains 2 (Uhrf2)                                    | 0.61 |
| <i>Ung</i>       | NM_145962.2    | uracil DNA glycosylase (Ung), transcript variant 2                                                  | 0.37 |
| <i>Upp1</i>      | NM_027995.2    | uridine phosphorylase 1 (Upp1)                                                                      | 0.23 |
| <i>Uqcr</i>      | NM_007415.2    | ubiquinol-cytochrome c reductase (6.4kD) subunit (Uqcr)                                             | 0.66 |
| <i>Uqcrc1</i>    | NM_054056.2    | ubiquinol-cytochrome c reductase core protein 1 (Uqcrc1)                                            | 0.54 |
| <i>Uqcrc2</i>    | NM_023209.1    | ubiquinol cytochrome c reductase core protein 2 (Uqcrc2)                                            | 0.62 |
| <i>Uqcrh</i>     | NM_001081251.1 | ubiquinol-cytochrome c reductase hinge protein (Uqcrh)                                              | 0.53 |
| <i>Usp1</i>      | NM_011865.3    | ubiquitin specific peptidase 1 (Usp1)                                                               | 0.47 |
| <i>Usp39</i>     | NM_011042.1    | ubiquitin specific peptidase 39 (Usp39)                                                             | 0.63 |
| <i>Usp11</i>     | NM_021567.2    | ubiquitin specific peptidase like 1 (Usp11)                                                         | 0.62 |
| <i>Utp111</i>    | NM_011043.3    | UTP11-like, U3 small nucleolar ribonucleoprotein, (yeast) (Utp111)                                  | 0.55 |
| <i>Uxt</i>       | NM_001013753.1 | ubiquitously expressed transcript (Uxt)                                                             | 0.49 |

|                 |                |                                                                                                   |      |
|-----------------|----------------|---------------------------------------------------------------------------------------------------|------|
| <i>Vamp3</i>    | NM_018764.1    | vesicle-associated membrane protein 3 (Vamp3)                                                     | 0.60 |
| <i>Vapa</i>     | NM_001081377.1 | vesicle-associated membrane protein, associated protein A (Vapa)                                  | 0.60 |
| <i>Vapb</i>     | NM_177546.2    | vesicle-associated membrane protein, associated protein B and C (Vapb)                            | 0.58 |
| <i>Vars</i>     | NM_024229.2    | valyl-tRNA synthetase (Vars), nuclear gene encoding mitochondrial protein                         | 0.46 |
| <i>Vav3</i>     | NM_001033313.3 | vav 3 oncogene (Vav3), transcript variant 1                                                       | 0.28 |
| <i>Vbp1</i>     | NM_026549.3    | von Hippel-Lindau binding protein 1 (Vbp1)                                                        | 0.57 |
| <i>Vdac1</i>    | NM_008808      | voltage-dependent anion channel 1 (Vdac1)                                                         | 0.54 |
| <i>Vdac2</i>    | NM_026840.2    | voltage-dependent anion channel 2 (Vdac2)                                                         | 0.26 |
| <i>Vdac3</i>    | NM_024221.3    | voltage-dependent anion channel 3 (Vdac3)                                                         | 0.57 |
| <i>Vegfa</i>    | NM_007952.2    | vascular endothelial growth factor A (Vegfa), transcript variant 2                                | 0.40 |
| <i>Vegfb</i>    | NM_028295.1    | vascular endothelial growth factor B (Vegfb)                                                      | 0.54 |
| <i>Vegfc</i>    | NM_145978.1    | vascular endothelial growth factor C (Vegfc)                                                      | 0.56 |
| <i>Vkorc1</i>   | NM_019417.2    | vitamin K epoxide reductase complex, subunit 1 (Vkorc1)                                           | 0.64 |
| <i>Vkorc111</i> | NM_019808.1    | vitamin K epoxide reductase complex, subunit 1-like 1 (Vkorc111), transcript variant 1            | 0.48 |
| <i>Vldlr</i>    | NM_026131      | very low density lipoprotein receptor (Vldlr)                                                     | 0.45 |
| <i>Vps29</i>    | NM_178939.2    | vacuolar protein sorting 29 (S. pombe) (Vps29)                                                    | 0.51 |
| <i>Vps36</i>    | NM_019501.3    | vacuolar protein sorting 36 (yeast) (Vps36)                                                       | 0.29 |
| <i>Vps54</i>    | NM_020271.3    | vacuolar protein sorting 54 (yeast) (Vps54)                                                       | 0.57 |
| <i>Vrk1</i>     | NM_018884.1    |                                                                                                   | 0.44 |
| <i>Wasf2</i>    | XM_001481302.1 |                                                                                                   | 0.52 |
| <i>Wbp11</i>    | NM_008556.1    | WW domain binding protein 11 (Wbp11)                                                              | 0.57 |
| <i>Wbscr17</i>  | NM_023324.2    | Williams-Beuren syndrome chromosome region 17 homolog (human) (Wbscr17)                           | 0.53 |
| <i>Wdr43</i>    | NM_033602      | PREDICTED: WD repeat domain 43, transcript variant 9 (Wdr43)                                      | 0.65 |
| <i>Wdr51b</i>   | NM_011070.3    | WD repeat domain 51B (Wdr51b)                                                                     | 0.61 |
| <i>Wdr74</i>    | NM_001013369.1 | WD repeat domain 74 (Wdr74)                                                                       | 0.60 |
| <i>Wdr75</i>    | NM_008825.3    | WD repeat domain 75 (Wdr75)                                                                       | 0.55 |
| <i>Wdr76</i>    | NM_173019.5    | WD repeat domain 76 (Wdr76)                                                                       | 0.54 |
| <i>Wdr82</i>    | NM_011072.3    | WD repeat domain containing 82 (Wdr82)                                                            | 0.62 |
| <i>Wdr89</i>    | NM_023418.2    | PREDICTED: WD repeat domain 89, transcript variant 2 (Wdr89)                                      | 0.56 |
| <i>Wdsof1</i>   | NM_028273.1    | WD repeats and SOF domain containing 1 (Wdsof1)                                                   | 0.66 |
| <i>Whsc1</i>    | NM_008828.2    |                                                                                                   | 0.47 |
| <i>Wsb2</i>     | NM_025396.3    | WD repeat and SOCS box-containing 2 (Wsb2)                                                        | 0.34 |
| <i>Wscd1</i>    | NM_025954.3    | WSC domain containing 1 (Wscd1)                                                                   | 0.41 |
| <i>Wwp1</i>     | NM_133757.2    | WW domain containing E3 ubiquitin protein ligase 1 (Wwp1)                                         | 0.65 |
| <i>Wwtr1</i>    | NM_007531.2    | WW domain containing transcription regulator 1 (Wwtr1)                                            | 0.60 |
| <i>Xbp1</i>     | NM_018774.3    | X-box binding protein 1 (Xbp1)                                                                    | 0.46 |
| <i>Xpnpep1</i>  | NM_025408.2    | X-prolyl aminopeptidase (aminopeptidase P) 1, soluble (Xpnpep1)                                   | 0.54 |
| <i>Xpo6</i>     | NM_024250.3    | exportin 6 (Xpo6)                                                                                 | 0.64 |
| <i>Xrcc6</i>    | NM_028716.1    | X-ray repair complementing defective repair in Chinese hamster cells 6 (Xrcc6)                    | 0.50 |
| <i>Yeats4</i>   | NM_172674.2    | YEATS domain containing 4 (Yeats4)                                                                | 0.58 |
| <i>Ywhab</i>    | NM_026737.3    | tyrosine 3-monooxygenase/tryptophan 5-monooxygenase activation protein, beta polypeptide (Ywhab)  | 0.58 |
| <i>Ywhag</i>    | NM_027642.1    | tyrosine 3-monooxygenase/tryptophan 5-monooxygenase activation protein, gamma polypeptide (Ywhag) | 0.47 |
| <i>Ywhah</i>    | NM_011079.2    | tyrosine 3-monooxygenase/tryptophan 5-monooxygenase activation protein, eta polypeptide (Ywhah)   | 0.35 |
| <i>Ywhaq</i>    | NM_009344.1    | tyrosine 3-monooxygenase/tryptophan 5-monooxygenase activation protein, theta polypeptide (Ywhaq) | 0.62 |
| <i>Zbtb7c</i>   | NM_172992.2    | zinc finger and BTB domain containing 7C (Zbtb7c)                                                 | 0.54 |
| <i>Zbtb8os</i>  | NM_008835.1    | zinc finger and BTB domain containing 8 opposite strand (Zbtb8os)                                 | 0.63 |
| <i>Zc3hc1</i>   | NM_001001983.1 | zinc finger, C3HC type 1 (Zc3hc1)                                                                 | 0.62 |
| <i>Zcrb1</i>    | NM_146194      | zinc finger CCHC-type and RNA binding motif 1 (Zcrb1)                                             | 0.63 |
| <i>Zdhhc21</i>  | NM_172453.1    | zinc finger, DHHC domain containing 21 (Zdhhc21)                                                  | 0.55 |
| <i>Zdhhc6</i>   | NM_011081.2    | zinc finger, DHHC domain containing 6 (Zdhhc6), transcript variant 2                              | 0.62 |
| <i>Zeb1</i>     | NM_029406.1    | zinc finger E-box binding homeobox 1 (Zeb1)                                                       | 0.31 |
| <i>Zfp106</i>   | NM_178149.4    | zinc finger protein 106 (Zfp106)                                                                  | 0.63 |
| <i>Zfp131</i>   | NM_054051.1    | zinc finger protein 131 (Zfp131)                                                                  | 0.63 |
| <i>Zfp148</i>   | NM_019640.4    | zinc finger protein 148 (Zfp148)                                                                  | 0.58 |
| <i>Zfp180</i>   | NM_011256.1    |                                                                                                   | 0.65 |
| <i>Zfp207</i>   | NM_145131.1    | zinc finger protein 207 (Zfp207)                                                                  | 0.62 |
| <i>Zfp330</i>   | NM_008853.1    | zinc finger protein 330 (Zfp330)                                                                  | 0.54 |
| <i>Zfp365</i>   | NM_144859.2    | zinc finger protein 365 (Zfp365)                                                                  | 0.41 |
| <i>Zfp518b</i>  | NM_013630.2    | zinc finger protein 518B (Zfp518b)                                                                | 0.63 |
| <i>Zfp710</i>   | NM_008862.3    | zinc finger protein 710 (Zfp710)                                                                  | 0.48 |
| <i>Zfp770</i>   | XM_131934.4    | zinc finger protein 770 (Zfp770)                                                                  | 0.51 |
| <i>Znrd1</i>    | NM_023058.3    | zinc ribbon domain containing, 1 (Znrd1)                                                          | 0.58 |
| <i>Znrf2</i>    | NM_178654.3    | zinc and ring finger 2 (Znrf2)                                                                    | 0.26 |
| <i>Zswim6</i>   | NM_175464.2    |                                                                                                   | 0.60 |

Zwint  
Zyx

NM\_023196.2  
NM\_013737.2

zyxin (Zyx)

0.62  
0.54
