# Supplementary material for: miR-30 Family miRNAs Mediate the Effect of Chronic Social Defeat Stress on Hippocampal Neurogenesis in Mouse Depression Model
Source: PubMed Central journal article supplement (PMC6694739; doi:10.3389/fnmol.2019.00188), 2019-08-08
Supplement: Table_9.pdf [file Table_9.pdf]

**Table S9. List of genes, which demonstrated increased expression (fold change  $\geq 1.5$  and  $p \leq 0.05$ ) in the differentiated cells from the late phase (day 7) when compared with the proliferating neurospheres**

| <u>Gene Symbol</u> | <u>Accession No.</u> | <u>Gene Definition</u>                                                       | <u>Fold Change</u> |
|--------------------|----------------------|------------------------------------------------------------------------------|--------------------|
| 0610010D24Rik      | NM_026681            |                                                                              | 1.59               |
| 1110012J17Rik      | NM_172963.3          | RIKEN cDNA 1110012J17 gene (1110012J17Rik)                                   | 1.90               |
| 1110017I16Rik      | NM_026754.2          | RIKEN cDNA 1110017I16 gene (1110017I16Rik), transcript variant 1             | 9.28               |
| 1110036D12Rik      |                      |                                                                              | 2.25               |
| 1190002N15Rik      | XM_147036            |                                                                              | 1.53               |
| 1190005I06Rik      | NM_197988.1          | RIKEN cDNA 1190005I06 gene (1190005I06Rik)                                   | 2.64               |
| 1190007F08Rik      | NM_001033144.1       | RIKEN cDNA 1190007F08 gene (1190007F08Rik)                                   | 2.68               |
| 1300010F03Rik      | XM_001002205.2       | PREDICTED: RIKEN cDNA 1300010F03 gene (1300010F03Rik)                        | 1.55               |
| 1500015O10Rik      | NM_024283.2          | RIKEN cDNA 1500015O10 gene (1500015O10Rik)                                   | 2.92               |
| 1500031L02Rik      | NM_025892.1          | RIKEN cDNA 1500031L02 gene (1500031L02Rik)                                   | 1.51               |
| 1700003E16Rik      | XM_001478332.1       | PREDICTED: RIKEN cDNA 1700003E16 gene, transcript variant 1 (1700003E16Rik)  | 2.08               |
| 1700007K13Rik      | NM_027040.1          | RIKEN cDNA 1700007K13 gene (1700007K13Rik)                                   | 4.02               |
| 1700009P17Rik      | NM_001081275.1       | RIKEN cDNA 1700009P17 gene (1700009P17Rik)                                   | 2.09               |
| 1700016J18Rik      | XM_994504.1          | PREDICTED: RIKEN cDNA 1700016J18 gene (1700016J18Rik)                        | 3.01               |
| 1700019L03Rik      | NM_025619.1          | RIKEN cDNA 1700019L03 gene (1700019L03Rik)                                   | 1.59               |
| 1700025K23Rik      | NM_183254.1          | RIKEN cDNA 1700025K23 gene (1700025K23Rik)                                   | 1.95               |
| 1700027A23Rik      | NM_029604.2          | RIKEN cDNA 1700027A23 gene (1700027A23Rik)                                   | 1.58               |
| 1700027N10Rik      | NM_029338.3          | RIKEN cDNA 1700027N10 gene (1700027N10Rik)                                   | 3.65               |
| 1700029J07Rik      | NM_001033148.2       | RIKEN cDNA 1700029J07 gene (1700029J07Rik)                                   | 2.87               |
| 1700073K01Rik      | NM_026626            |                                                                              | 1.76               |
| 1700084C01Rik      | NM_001033185.2       | RIKEN cDNA 1700084C01 gene (1700084C01Rik)                                   | 5.74               |
| 1700088E04Rik      | NM_138581.2          | RIKEN cDNA 1700088E04 gene (1700088E04Rik)                                   | 3.77               |
| 1810007P19Rik      | NM_172701.2          | RIKEN cDNA 1810007P19 gene (1810007P19Rik)                                   | 1.78               |
| 1810013B01Rik      | NM_029631            |                                                                              | 2.32               |
| 2010001J22Rik      | NM_001013022.1       | RIKEN cDNA 2010001J22 gene (2010001J22Rik)                                   | 1.51               |
| 2010004M13Rik      |                      |                                                                              | 2.35               |
| 2010005O13Rik      | NM_145512            |                                                                              | 1.54               |
| 2310001H12Rik      | XM_901486.2          | PREDICTED: RIKEN cDNA 2310001H12 gene, transcript variant 21 (2310001H12Rik) | 1.62               |
| 2310007A19Rik      | NM_025506.2          | RIKEN cDNA 2310007A19 gene (2310007A19Rik)                                   | 2.49               |
| 2310009E04Rik      | XM_131496.4          |                                                                              | 1.74               |
| 2310014G06Rik      | NM_001082975.1       | RIKEN cDNA 2310014G06 gene (2310014G06Rik)                                   | 1.66               |
| 2310022B05Rik      | NM_175149.3          | RIKEN cDNA 2310022B05 gene (2310022B05Rik)                                   | 3.15               |
| 2310040A07Rik      | XM_912979.2          | PREDICTED: RIKEN cDNA 2310040A07 gene (2310040A07Rik)                        | 1.83               |
| 2310043N10Rik      | NR_003513.2          | RIKEN cDNA 2310043N10 gene (2310043N10Rik), non-coding RNA.                  | 3.26               |
| 2310061J03Rik      | XM_148411.1          |                                                                              | 1.98               |
| 2310079P10Rik      |                      |                                                                              | 1.96               |
| 2410001C21Rik      | NM_025542.1          | RIKEN cDNA 2410001C21 gene (2410001C21Rik)                                   | 1.69               |
| 2410025L10Rik      | NM_028596.2          | RIKEN cDNA 2410025L10 gene (2410025L10Rik)                                   | 1.83               |
| 2410187C16Rik      | NM_029734.1          | RIKEN cDNA 2410187C16 gene (2410187C16Rik)                                   | 1.58               |
| 2610035D17Rik      | XM_902349.2          | PREDICTED: RIKEN cDNA 2610035D17 gene (2610035D17Rik)                        | 1.97               |
| 2610204M08Rik      | NM_198411.2          | RIKEN cDNA 2610204M08 gene (2610204M08Rik)                                   | 1.51               |
| 2610524A10Rik      | NM_028258.1          |                                                                              | 1.83               |
| 2700046G09Rik      | XR_035347.1          | PREDICTED: RIKEN cDNA 2700046G09 gene (2700046G09Rik), misc RNA.             | 1.53               |
| 2700050C19Rik      |                      |                                                                              | 1.83               |
| 2700060E02Rik      | NM_026528.3          | RIKEN cDNA 2700060E02 gene (2700060E02Rik)                                   | 3.78               |
| 2810003C17Rik      | NM_145144.1          | RIKEN cDNA 2810003C17 gene (2810003C17Rik)                                   | 3.75               |
| 2810029C07Rik      |                      |                                                                              | 1.74               |
| 2810441K11Rik      | NM_026798.1          | RIKEN cDNA 2810441K11 gene (2810441K11Rik)                                   | 1.83               |
| 2810459M11Rik      | XM_484890            |                                                                              | 2.19               |
| 2900011O08Rik      | NM_144518.3          | RIKEN cDNA 2900011O08 gene (2900011O08Rik)                                   | 2.56               |
| 2900026A02Rik      | NM_172884            |                                                                              | 1.54               |
| 3010015F07Rik      | AK076147             |                                                                              | 1.56               |
| 3100002J23Rik      | XM_001002726.1       | PREDICTED: RIKEN cDNA 3100002J23 gene, transcript variant 2 (3100002J23Rik)  | 5.16               |
| 3110018K01Rik      |                      |                                                                              | 2.48               |
| 3110023G01Rik      | AK014074             |                                                                              | 1.63               |
| 4432405B04Rik      | NM_026486.1          | RIKEN cDNA 4432405B04 gene (4432405B04Rik)                                   | 1.97               |
| 4631416L12Rik      | NM_001081295.1       | RIKEN cDNA 4631416L12 gene (4631416L12Rik)                                   | 1.82               |
| 4632408A20Rik      | XM_126946.2          |                                                                              | 1.57               |
| 4832420L08Rik      | AK029315             |                                                                              | 1.97               |
| 4833409N03Rik      |                      |                                                                              | 2.40               |
| 4833414E09Rik      | NM_027845.1          |                                                                              | 1.69               |
| 4833420G17Rik      | NM_026127.3          | RIKEN cDNA 4833420G17 gene (4833420G17Rik)                                   | 1.57               |
| 4833441J24Rik      | NM_133923.2          |                                                                              | 3.13               |

|                      |                |                                                                                       |      |
|----------------------|----------------|---------------------------------------------------------------------------------------|------|
| <i>4921530F17Rik</i> | AK029558       |                                                                                       | 1.61 |
| <i>4922501L14Rik</i> | XM_001481326.1 | PREDICTED: RIKEN cDNA 4922501L14 gene (4922501L14Rik)                                 | 1.71 |
| <i>4930402H24Rik</i> | AK015050       |                                                                                       | 2.74 |
| <i>4930438O05Rik</i> | NM_027507.1    |                                                                                       | 1.77 |
| <i>4930455F23Rik</i> | NM_029115.1    | RIKEN cDNA 4930455F23 gene (4930455F23Rik)                                            | 1.91 |
| <i>4930528G09Rik</i> | XM_355576.1    |                                                                                       | 1.78 |
| <i>4930533K18Rik</i> |                |                                                                                       | 2.09 |
| <i>4930570C03Rik</i> | NM_026353.2    | RIKEN cDNA 4930570C03 gene (4930570C03Rik)                                            | 1.85 |
| <i>4931426K16Rik</i> | XM_357260.1    |                                                                                       | 1.82 |
| <i>4932425I24Rik</i> | NM_001081025.1 | RIKEN cDNA 4932425I24 gene (4932425I24Rik)                                            | 3.18 |
| <i>4932441K18Rik</i> | NM_178935.2    | RIKEN cDNA 4932441K18 gene (4932441K18Rik)                                            | 1.66 |
| <i>4932443I19Rik</i> | XM_620624.3    | PREDICTED: RIKEN cDNA 4932443I19 gene, transcript variant 1 (4932443I19Rik)           | 2.07 |
| <i>4933407L21Rik</i> | XM_129929.1    |                                                                                       | 4.03 |
| <i>4933421G18Rik</i> | NM_027707      |                                                                                       | 2.14 |
| <i>4933428D01Rik</i> | XM_127662.2    |                                                                                       | 1.55 |
| <i>4933434I06Rik</i> | NM_027728.2    | RIKEN cDNA 4933434I06 gene (4933434I06Rik)                                            | 5.62 |
| <i>4933439C20Rik</i> | NM_001004146.1 | RIKEN cDNA 4933439C20 gene (4933439C20Rik)                                            | 2.14 |
| <i>5031425E22Rik</i> | XM_149592.1    |                                                                                       | 1.70 |
| <i>5031428M13Rik</i> | AK030317       |                                                                                       | 2.06 |
| <i>5031436O03Rik</i> |                |                                                                                       | 1.54 |
| <i>5031439G07Rik</i> | XM_128281      |                                                                                       | 1.77 |
| <i>5033414K04Rik</i> | NM_001003948.1 | RIKEN cDNA 5033414K04 gene (5033414K04Rik)                                            | 2.06 |
| <i>5330403J18Rik</i> | AK030367       |                                                                                       | 2.57 |
| <i>5330431K02Rik</i> | NM_026606.1    |                                                                                       | 1.71 |
| <i>5430405G05Rik</i> | AK077378       |                                                                                       | 2.01 |
| <i>5430434G16Rik</i> |                |                                                                                       | 1.67 |
| <i>5430435G22Rik</i> | NM_145509.1    | RIKEN cDNA 5430435G22 gene (5430435G22Rik)                                            | 1.52 |
| <i>5730402C02Rik</i> | NM_027442      |                                                                                       | 2.45 |
| <i>5730410E15Rik</i> | NM_178765.3    | RIKEN cDNA 5730410E15 gene (5730410E15Rik), transcript variant c                      | 2.22 |
| <i>5830407P18Rik</i> | XM_147876.1    |                                                                                       | 1.59 |
| <i>6030410I10Rik</i> | AK031346       |                                                                                       | 2.00 |
| <i>6230400G14Rik</i> |                |                                                                                       | 1.79 |
| <i>6330403K07Rik</i> | NM_134022.2    | RIKEN cDNA 6330403K07 gene (6330403K07Rik)                                            | 2.21 |
| <i>6330405H19</i>    | XM_358637.1    |                                                                                       | 1.70 |
| <i>6330414G02Rik</i> |                |                                                                                       | 9.37 |
| <i>6330505N24Rik</i> | NM_001033301.2 | RIKEN cDNA 6330505N24 gene (6330505N24Rik)                                            | 2.08 |
| <i>6430537H07Rik</i> | NM_178689.3    | RIKEN cDNA 6430537H07 gene (6430537H07Rik)                                            | 2.28 |
| <i>6430548M08Rik</i> | NM_172286      |                                                                                       | 2.62 |
| <i>7330410H16Rik</i> |                |                                                                                       | 1.82 |
| <i>7530408C15Rik</i> |                |                                                                                       | 1.74 |
| <i>8030404L10Rik</i> |                |                                                                                       | 1.51 |
| <i>8030467N07Rik</i> | AK078769       |                                                                                       | 1.64 |
| <i>9130020G22Rik</i> | AK082376       |                                                                                       | 1.61 |
| <i>9330155G14Rik</i> | AK079073       |                                                                                       | 1.53 |
| <i>9330177P20Rik</i> | NM_177462      |                                                                                       | 1.65 |
| <i>9330185J12Rik</i> |                |                                                                                       | 2.05 |
| <i>9630009A08Rik</i> | AK035833       |                                                                                       | 2.25 |
| <i>9630025I21Rik</i> | NM_001076791.2 | RIKEN cDNA 9630025I21 gene (9630025I21Rik)                                            | 1.71 |
| <i>9830134K01Rik</i> | AK036567       |                                                                                       | 1.58 |
| <i>9830169C18Rik</i> | NM_172581.1    | RIKEN cDNA 9830169C18 gene (9830169C18Rik)                                            | 1.65 |
| <i>A130022A09Rik</i> | AK037499       |                                                                                       | 1.52 |
| <i>A230057G18Rik</i> | XM_489103      |                                                                                       | 3.67 |
| <i>A230057M07Rik</i> | AK038731       |                                                                                       | 1.83 |
| <i>a2ld1</i>         | NM_145466.1    | AIG2-like domain 1 (a2ld1)                                                            | 1.50 |
| <i>A330021E22Rik</i> | NM_172447.2    | RIKEN cDNA A330021E22 gene (A330021E22Rik)                                            | 2.48 |
| <i>A430010E21Rik</i> | AK039823       |                                                                                       | 1.51 |
| <i>A730036E13Rik</i> | XM_989657.2    | PREDICTED: RIKEN cDNA A730036E13 gene (A730036E13Rik)                                 | 1.54 |
| <i>A830073O21Rik</i> | NM_177118      |                                                                                       | 2.44 |
| <i>A830080H07Rik</i> |                |                                                                                       | 1.91 |
| <i>A830087P12Rik</i> | AK044077       |                                                                                       | 1.51 |
| <i>A830094I09Rik</i> | NM_177225      |                                                                                       | 1.91 |
| <i>A930008A22Rik</i> | NM_172768      |                                                                                       | 2.94 |
| <i>Abat</i>          | NM_172961.2    | 4-aminobutyrate aminotransferase (Abat), nuclear gene encoding mitochondrial protein  | 1.59 |
| <i>Abcc12</i>        | NM_172912.4    | ATP-binding cassette, sub-family C (CFTR/MRP), member 12 (Abcc12)                     | 2.79 |
| <i>Abcc5</i>         | NM_176839.1    | ATP-binding cassette, sub-family C (CFTR/MRP), member 5 (Abcc5), transcript variant 2 | 1.85 |
| <i>Abhd1</i>         | NR_003522.1    | abhydrolase domain containing 1 (Abhd1), transcribed RNA.                             | 1.80 |
| <i>Abhd14b</i>       | NM_029631.2    | abhydrolase domain containing 14b (Abhd14b)                                           | 5.69 |
| <i>Abhd4</i>         | NM_134076.1    | abhydrolase domain containing 4 (Abhd4)                                               | 1.55 |

|                 |                |                                                                                                                                  |       |
|-----------------|----------------|----------------------------------------------------------------------------------------------------------------------------------|-------|
| <i>Abhd7</i>    | NM_001001804.2 | abhydrolase domain containing 7 (Abhd7)                                                                                          | 1.50  |
| <i>Ablim2</i>   | NM_177678.6    | actin-binding LIM protein 2 (Ablim2)                                                                                             | 2.29  |
| <i>Acadsb</i>   | NM_025826.3    | acyl-Coenzyme A dehydrogenase, short/branched chain (Acadsb), nuclear gene encoding mitochondrial protein                        | 1.53  |
| <i>Acot1</i>    | NM_012006.2    | acyl-CoA thioesterase 1 (Acot1)                                                                                                  | 1.87  |
| <i>Acot11</i>   | NM_025590.3    | acyl-CoA thioesterase 11 (Acot11)                                                                                                | 2.15  |
| <i>Acsl6</i>    | NM_001033597.1 | acyl-CoA synthetase long-chain family member 6 (Acsl6), transcript variant 2                                                     | 2.28  |
| <i>Acss1</i>    | NM_080575.1    | acyl-CoA synthetase short-chain family member 1 (Acss1), nuclear gene encoding mitochondrial protein                             | 2.04  |
| <i>Acta2</i>    | NM_007392.2    | actin, alpha 2, smooth muscle, aorta (Acta2)                                                                                     | 2.38  |
| <i>Actn1</i>    | NM_134156.1    | actinin, alpha 1 (Actn1)                                                                                                         | 2.59  |
| <i>Adamts16</i> | NM_172053.2    | a disintegrin-like and metallopeptidase (reprolysin type) with thrombospondin type 1 motif, 16 (Adamts16)                        | 2.14  |
| <i>Adamtsl4</i> | NM_144899.2    | ADAMTS-like 4 (Adamtsl4)                                                                                                         | 2.33  |
| <i>Adck4</i>    | NM_133770.1    |                                                                                                                                  | 1.85  |
| <i>Adcy2</i>    | NM_153534.2    | adenylate cyclase 2 (Adcy2)                                                                                                      | 2.43  |
| <i>Adcy8</i>    | NM_009623.2    | adenylate cyclase 8 (Adcy8)                                                                                                      | 2.36  |
| <i>Adora1</i>   | NM_001008533.2 | adenosine A1 receptor (Adora1), transcript variant 1                                                                             | 1.63  |
| <i>Adra2a</i>   | NM_007417.2    | adrenergic receptor, alpha 2a (Adra2a)                                                                                           | 8.83  |
| <i>Agpat3</i>   | NM_053014.3    | 1-acylglycerol-3-phosphate O-acyltransferase 3 (Agpat3)                                                                          | 1.52  |
| <i>Agpat4</i>   | NM_026644.1    | 1-acylglycerol-3-phosphate O-acyltransferase 4 (lysophosphatidic acid acyltransferase, delta) (Agpat4)                           | 1.79  |
| <i>Ahnak</i>    | NM_009643.1    | AHNAK nucleoprotein (desmoyokin) (Ahnak), transcript variant 1                                                                   | 22.31 |
| <i>AI316807</i> | NM_001012667.1 | expressed sequence AI316807 (AI316807)                                                                                           | 1.53  |
| <i>AI646023</i> | NM_198860.1    | expressed sequence AI646023 (AI646023)                                                                                           | 1.58  |
| <i>AI662250</i> | NM_178926.2    | expressed sequence AI662250 (AI662250)                                                                                           | 1.95  |
| <i>AI875142</i> |                |                                                                                                                                  | 2.74  |
| <i>Aifm2</i>    | NM_153779.1    | apoptosis-inducing factor, mitochondrion-associated 2 (Aifm2), nuclear gene encoding mitochondrial protein, transcript variant 1 | 1.53  |
| <i>Ak3</i>      | NM_021299.1    | adenylate kinase 3 (Ak3), nuclear gene encoding mitochondrial protein                                                            | 1.51  |
| <i>Ak3l1</i>    | NM_009647.4    | adenylate kinase 3-like 1 (Ak3l1), nuclear gene encoding mitochondrial protein                                                   | 1.73  |
| <i>Akap14</i>   | NM_001033785.1 | A kinase (PRKA) anchor protein 14 (Akap14)                                                                                       | 2.75  |
| <i>Akap8l</i>   | NM_017476.2    | A kinase (PRKA) anchor protein 8-like (Akap8l)                                                                                   | 2.03  |
| <i>Aktip</i>    | NM_010241.1    | thymoma viral proto-oncogene 1 interacting protein (Aktip)                                                                       | 1.71  |
| <i>Aldh1a1</i>  | NM_013467.3    | aldehyde dehydrogenase family 1, subfamily A1 (Aldh1a1)                                                                          | 2.29  |
| <i>Aldh3a2</i>  | NM_007437      |                                                                                                                                  | 1.72  |
| <i>Aldh4a1</i>  | NM_175438.3    | aldehyde dehydrogenase 4 family, member A1 (Aldh4a1), nuclear gene encoding mitochondrial protein                                | 1.90  |
| <i>Aldh6a1</i>  | NM_134042.2    | aldehyde dehydrogenase family 6, subfamily A1 (Aldh6a1), nuclear gene encoding mitochondrial protein                             | 1.76  |
| <i>Aldoc</i>    | NM_009657.3    | aldolase C, fructose-bisphosphate (Aldoc)                                                                                        | 1.55  |
| <i>Amy1</i>     | NM_007446.1    | amylase 1, salivary (Amy1)                                                                                                       | 1.67  |
| <i>Amy2-2</i>   | NM_001042711.2 | amylase 2-2, pancreatic (Amy2-2)                                                                                                 | 4.70  |
| <i>Anapc2</i>   | NM_175300.2    | anaphase promoting complex subunit 2 (Anapc2)                                                                                    | 1.95  |
| <i>Angpt1</i>   | NM_009640.3    | angiopoietin 1 (Angpt1)                                                                                                          | 1.76  |
| <i>Angptl4</i>  | NM_020581.1    | angiopoietin-like 4 (Angptl4)                                                                                                    | 2.20  |
| <i>Ank</i>      | NM_020332.3    | progressive ankylosis (Ank)                                                                                                      | 3.90  |
| <i>Anks3</i>    | NM_028301.2    | ankyrin repeat and sterile alpha motif domain containing 3 (Anks3)                                                               | 1.56  |
| <i>Anxa11</i>   | NM_013469.1    | annexin A11 (Anxa11)                                                                                                             | 1.75  |
| <i>Anxa4</i>    | NM_013471      |                                                                                                                                  | 1.57  |
| <i>Anxa5</i>    | NM_009673.1    | annexin A5 (Anxa5)                                                                                                               | 2.74  |
| <i>Ap3m2</i>    | NM_029505.1    | adaptor-related protein complex 3, mu 2 subunit (Ap3m2)                                                                          | 3.35  |
| <i>Apbb1</i>    | NM_009685.2    | amyloid beta (A4) precursor protein-binding, family B, member 1 (Apbb1)                                                          | 1.64  |
| <i>Aph1b</i>    | NM_177583.4    | anterior pharynx defective 1b homolog (C. elegans) (Aph1b)                                                                       | 1.78  |
| <i>Apoe</i>     | NM_009696.2    | apolipoprotein E (Apoe)                                                                                                          | 7.47  |
| <i>Appl2</i>    | NM_145220.2    | adaptor protein, phosphotyrosine interaction, PH domain and leucine zipper containing 2 (Appl2)                                  | 1.54  |
| <i>Aqp4</i>     | NM_009700.1    | aquaporin 4 (Aqp4)                                                                                                               | 4.26  |
| <i>Aqp9</i>     | NM_022026.2    | aquaporin 9 (Aqp9)                                                                                                               | 1.62  |
| <i>Arf2</i>     | NM_007477.4    | ADP-ribosylation factor 2 (Arf2)                                                                                                 | 1.63  |
| <i>Arhgap12</i> | NM_029277.2    | Rho GTPase activating protein 12 (Arhgap12), transcript variant 2                                                                | 2.32  |
| <i>Arhgef18</i> | NM_133962.3    | rho/rac guanine nucleotide exchange factor (GEF) 18 (Arhgef18)                                                                   | 2.08  |
| <i>Arhgef4</i>  | NM_183019.2    | Rho guanine nucleotide exchange factor (GEF) 4 (Arhgef4)                                                                         | 3.57  |
| <i>Armc3</i>    | NM_001081083.1 | armadillo repeat containing 3 (Armc3)                                                                                            | 2.37  |
| <i>Armc9</i>    | NM_030184.2    | armadillo repeat containing 9 (Armc9), transcript variant 1                                                                      | 1.69  |
| <i>Arrdc3</i>   | NM_178917.2    |                                                                                                                                  | 2.53  |
| <i>Arsb</i>     | NM_009712.3    | arylsulfatase B (Arsb)                                                                                                           | 4.94  |
| <i>Ascc1</i>    | NM_026937.1    | activating signal cointegrator 1 complex subunit 1 (Ascc1)                                                                       | 1.97  |
| <i>Asphd2</i>   | NM_028386.1    | aspartate beta-hydroxylase domain containing 2 (Asphd2)                                                                          | 1.77  |
| <i>Ass1</i>     | NM_007494.3    | argininosuccinate synthetase 1 (Ass1)                                                                                            | 2.32  |
| <i>Atf3</i>     | NM_007498.2    | activating transcription factor 3 (Atf3)                                                                                         | 1.92  |

|                      |                |                                                                                               |       |
|----------------------|----------------|-----------------------------------------------------------------------------------------------|-------|
| <i>Atp1a1</i>        | NM_144900.1    | ATPase, Na <sup>+</sup> /K <sup>+</sup> transporting, alpha 1 polypeptide (Atp1a1)            | 2.31  |
| <i>Atp1b1</i>        | NM_009721.4    | ATPase, Na <sup>+</sup> /K <sup>+</sup> transporting, beta 1 polypeptide (Atp1b1)             | 2.17  |
| <i>AU021034</i>      | NM_177629.2    | expressed sequence AU021034 (AU021034)                                                        | 4.04  |
| <i>AU040829</i>      | NM_175003.3    | expressed sequence AU040829 (AU040829), transcript variant 2                                  | 1.53  |
| <i>AW555464</i>      | XM_127132.3    |                                                                                               | 2.82  |
| <i>Axl</i>           | NM_009465.3    | AXL receptor tyrosine kinase (Axl)                                                            | 2.27  |
| <i>B230112P13Rik</i> |                |                                                                                               | 2.27  |
| <i>B230208N19Rik</i> | XM_981366.1    | PREDICTED: RIKEN cDNA B230208N19 gene, transcript variant 1 (B230208N19Rik)                   | 1.65  |
| <i>B230311B06Rik</i> | XM_001001884.2 | PREDICTED: RIKEN cDNA B230311B06 gene (B230311B06Rik)                                         | 1.79  |
| <i>B230312I18Rik</i> | XM_001002154.1 | PREDICTED: RIKEN cDNA B230312I18 gene, transcript variant 3 (B230312I18Rik)                   | 1.57  |
| <i>B230326M20Rik</i> | AK045953       |                                                                                               | 2.32  |
| <i>B230342M21Rik</i> | NM_133898.3    | RIKEN cDNA B230342M21 gene (B230342M21Rik)                                                    | 1.58  |
| <i>B230342N21Rik</i> | AK046118       |                                                                                               | 1.88  |
| <i>B230373P09Rik</i> | NM_177336.2    |                                                                                               | 1.50  |
| <i>B3galt5</i>       | NM_033149.2    | UDP-Gal:betaGlcNAc beta 1,3-galactosyltransferase, polypeptide 5 (B3galt5)                    | 1.52  |
| <i>B930008G03Rik</i> | AK046967       |                                                                                               | 4.55  |
| <i>B930041G04</i>    | NM_177750.2    | hypothetical protein B930041G04 (B930041G04)                                                  | 1.62  |
| <i>B930045J24Rik</i> | AK047284       |                                                                                               | 1.87  |
| <i>B9d1</i>          | NM_013717.2    | B9 protein domain 1 (B9d1)                                                                    | 2.25  |
| <i>Bace2</i>         | NM_019517.2    | beta-site APP-cleaving enzyme 2 (Bace2)                                                       | 2.91  |
| <i>BB128963</i>      | NM_172742      |                                                                                               | 1.57  |
| <i>Bbc3</i>          | NM_133234.1    | BCL2 binding component 3 (Bbc3)                                                               | 1.94  |
| <i>Bbox1</i>         | NM_130452.1    | butyrobetaine (gamma), 2-oxoglutarate dioxygenase 1 (gamma-butyrobetaine hydroxylase) (Bbox1) | 3.68  |
| <i>Bbs2</i>          | NM_026116.2    | Bardet-Biedl syndrome 2 (human) (Bbs2)                                                        | 1.96  |
| <i>Bbs4</i>          | NM_175325.2    | Bardet-Biedl syndrome 4 (human) (Bbs4)                                                        | 2.30  |
| <i>Bbs9</i>          | NM_181316.3    | Bardet-Biedl syndrome 9 (Bbs9)                                                                | 1.79  |
| <i>BC022687</i>      | NM_145450.3    | cDNA sequence BC022687 (BC022687)                                                             | 1.63  |
| <i>BC024537</i>      | NM_146237.1    |                                                                                               | 1.68  |
| <i>BC030476</i>      | NM_173421.1    | cDNA sequence BC030476 (BC030476)                                                             | 3.19  |
| <i>BC038167</i>      | XM_196478      |                                                                                               | 3.23  |
| <i>BC050811</i>      | NM_178418.2    | cDNA sequence BC050811 (BC050811)                                                             | 2.23  |
| <i>BC051142</i>      | NM_001001177.1 | cDNA sequence BC051142 (BC051142)                                                             | 1.58  |
| <i>BC099439</i>      | NM_001025564.1 | cDNA sequence BC099439 (BC099439)                                                             | 3.32  |
| <i>Bcar3</i>         | NM_013867.1    | breast cancer anti-estrogen resistance 3 (Bcar3)                                              | 1.72  |
| <i>Bcas3</i>         | NM_138681.3    | breast carcinoma amplified sequence 3 (Bcas3)                                                 | 2.39  |
| <i>Bdh2</i>          | NM_027208.1    | 3-hydroxybutyrate dehydrogenase, type 2 (Bdh2)                                                | 5.05  |
| <i>Bicc1</i>         | NM_031397.2    | bicaudal C homolog 1 (Drosophila) (Bicc1)                                                     | 2.27  |
| <i>Birc1cl</i>       |                |                                                                                               | 2.79  |
| <i>Bloc1s1</i>       | NM_015740.2    | biogenesis of lysosome-related organelles complex-1, subunit 1 (Bloc1s1)                      | 1.54  |
| <i>Bmpr1b</i>        | NM_007560.3    | bone morphogenetic protein receptor, type 1B (Bmpr1b)                                         | 1.50  |
| <i>Bzrap1</i>        | NM_172449.1    | benzodiazapine receptor associated protein 1 (Bzrap1)                                         | 3.28  |
| <i>C030009J22Rik</i> |                |                                                                                               | 7.44  |
| <i>C030014I23Rik</i> |                |                                                                                               | 1.61  |
| <i>C030027H14Rik</i> |                |                                                                                               | 1.95  |
| <i>C030048H21Rik</i> | XM_975397.2    | PREDICTED: RIKEN cDNA C030048H21 gene (C030048H21Rik)                                         | 1.80  |
| <i>C130023A14Rik</i> |                |                                                                                               | 1.78  |
| <i>C130072A16Rik</i> | AK081724       |                                                                                               | 1.55  |
| <i>C130092E12</i>    |                |                                                                                               | 1.72  |
| <i>C1ql2</i>         | NM_207233.1    | complement component 1, q subcomponent-like 2 (C1ql2)                                         | 1.72  |
| <i>C230037E05Rik</i> |                |                                                                                               | 1.52  |
| <i>C230070D10Rik</i> | AK082620       |                                                                                               | 2.72  |
| <i>C3</i>            | NM_009778.1    |                                                                                               | 51.54 |
| <i>C330001K17Rik</i> | XM_134745.2    |                                                                                               | 1.60  |
| <i>C430004E15Rik</i> | NM_175286.3    | RIKEN cDNA C430004E15 gene (C430004E15Rik)                                                    | 1.60  |
| <i>C4a</i>           | NM_011413.2    | complement component 4A (Rodgers blood group) (C4a)                                           | 7.50  |
| <i>C4b</i>           | NM_009780.1    | complement component 4B (Childo blood group) (C4b)                                            | 6.26  |
| <i>C530044C16Rik</i> |                |                                                                                               | 7.10  |
| <i>C530044N13Rik</i> | NM_146067.3    | RIKEN cDNA C530044N13 gene (C530044N13Rik)                                                    | 1.51  |
| <i>C630002C17Rik</i> | AK049826       |                                                                                               | 3.41  |
| <i>C730013011Rik</i> | AK050083       |                                                                                               | 1.70  |
| <i>Cachd1</i>        | NM_198037.1    | cache domain containing 1 (Cachd1)                                                            | 2.54  |
| <i>Cacna2d3</i>      | NM_009785.1    | calcium channel, voltage-dependent, alpha2/delta subunit 3 (Cacna2d3)                         | 1.53  |
| <i>Cacnb4</i>        | NM_146123.2    | calcium channel, voltage-dependent, beta 4 subunit (Cacnb4), transcript variant 2             | 1.64  |
| <i>Camk2g</i>        | NM_178597.4    | calcium/calmodulin-dependent protein kinase II gamma (Camk2g)                                 | 1.62  |
| <i>Capn1</i>         | NM_007600.2    | calpain 1 (Capn1)                                                                             | 1.53  |
| <i>Capn6</i>         | NM_007603.2    | calpain 6 (Capn6)                                                                             | 1.55  |
| <i>Capns1</i>        | NM_009795      |                                                                                               | 1.62  |

|                 |                |                                                                                                   |      |
|-----------------|----------------|---------------------------------------------------------------------------------------------------|------|
| <i>Capsl</i>    | NM_029341.1    | calcyphosine-like (Capsl)                                                                         | 1.72 |
| <i>Carhsp1</i>  | NM_025821.2    | calcium regulated heat stable protein 1 (Carhsp1)                                                 | 1.79 |
| <i>Casq2</i>    | NM_009814.1    | calsequestrin 2 (Casq2)                                                                           | 2.03 |
| <i>Cbx7</i>     | NM_144811.3    | chromobox homolog 7 (Cbx7)                                                                        | 1.59 |
| <i>Cc2d2a</i>   | NM_172274.1    | coiled-coil and C2 domain containing 2A (Cc2d2a)                                                  | 1.52 |
| <i>Ccdc103</i>  | NM_028492.2    | coiled-coil domain containing 103 (Ccdc103)                                                       | 1.55 |
| <i>Ccdc114</i>  | NM_001033243.2 | coiled-coil domain containing 114 (Ccdc114)                                                       | 1.70 |
| <i>Ccdc19</i>   | XM_355284.5    | PREDICTED: coiled-coil domain containing 19, transcript variant 1 (Ccdc19)                        | 2.52 |
| <i>Ccdc39</i>   | NM_026222.2    | coiled-coil domain containing 39 (Ccdc39)                                                         | 2.24 |
| <i>Ccdc65</i>   | NM_153518.1    | coiled-coil domain containing 65 (Ccdc65)                                                         | 1.65 |
| <i>Ccdc80</i>   | NM_026439.2    | coiled-coil domain containing 80 (Ccdc80)                                                         | 1.54 |
| <i>Ccdc96</i>   | NM_025725.2    | coiled-coil domain containing 96 (Ccdc96)                                                         | 1.89 |
| <i>Ccl27</i>    | NM_001048179.1 | chemokine (C-C motif) ligand 27 (Ccl27), transcript variant 2                                     | 1.62 |
| <i>Ccrk</i>     | NM_053180.2    | cell cycle related kinase (Ccrk)                                                                  | 2.18 |
| <i>Cd109</i>    | NM_153098.2    | CD109 antigen (Cd109)                                                                             | 2.37 |
| <i>Cd14</i>     | NM_009841.3    | CD14 antigen (Cd14)                                                                               | 1.96 |
| <i>Cd200</i>    | NM_010818.3    | CD200 antigen (Cd200)                                                                             | 1.53 |
| <i>Cd59a</i>    | NM_007652.2    | CD59a antigen (Cd59a)                                                                             | 6.72 |
| <i>Cd59b</i>    | NM_181858.1    | CD59b antigen (Cd59b)                                                                             | 1.68 |
| <i>Cdc42ep4</i> | NM_020006.1    | CDC42 effector protein (Rho GTPase binding) 4 (Cdc42ep4)                                          | 2.29 |
| <i>Cdkn2b</i>   | NM_007670.3    | cyclin-dependent kinase inhibitor 2B (p15, inhibits CDK4) (Cdkn2b)                                | 1.88 |
| <i>Cdo1</i>     | NM_033037.3    | cysteine dioxygenase 1, cytosolic (Cdo1)                                                          | 2.10 |
| <i>Cds1</i>     | NM_173370.3    | CDP-diacylglycerol synthase 1 (Cds1)                                                              | 1.86 |
| <i>Celsr1</i>   | NM_009886.2    | cadherin, EGF LAG seven-pass G-type receptor 1 (flamingo homolog, Drosophila) (Celsr1)            | 1.69 |
| <i>Cetn4</i>    | NM_145825.1    | centrin 4 (Cetn4)                                                                                 | 2.74 |
| <i>Chchd10</i>  | NM_175329.3    | coiled-coil-helix-coiled-coil-helix domain containing 10 (Chchd10)                                | 2.89 |
| <i>Chchd6</i>   | NM_025351.2    | coiled-coil-helix-coiled-coil-helix domain containing 6 (Chchd6)                                  | 1.51 |
| <i>Chd5</i>     | NM_001081376.1 | chromodomain helicase DNA binding protein 5 (Chd5), transcript variant 1                          | 1.64 |
| <i>Chi3l1</i>   | NM_007695.2    | chitinase 3-like 1 (Chi3l1)                                                                       | 8.13 |
| <i>Chka</i>     | NM_001025566.1 | choline kinase alpha (Chka), transcript variant 2                                                 | 1.93 |
| <i>Ckap5</i>    | NM_029437.1    | cytoskeleton associated protein 5 (Ckap5)                                                         | 1.57 |
| <i>Ckmt1</i>    | NM_009897.2    | creatine kinase, mitochondrial 1, ubiquitous (Ckmt1), nuclear gene encoding mitochondrial protein | 1.69 |
| <i>Cldn2</i>    | NM_016675.3    | claudin 2 (Cldn2)                                                                                 | 1.51 |
| <i>Clip4</i>    | NM_030179.2    | CAP-GLY domain containing linker protein family, member 4 (Clip4)                                 | 1.82 |
| <i>Cln3</i>     | NM_009907.2    | ceroid lipofuscinosis, neuronal 3, juvenile (Batten, Spielmeyer-Vogt disease) (Cln3)              | 1.58 |
| <i>Cml1</i>     | NM_023160.1    | camello-like 1 (Cml1)                                                                             | 3.11 |
| <i>Cml4</i>     | NM_023455.2    | camello-like 4 (Cml4)                                                                             | 2.21 |
| <i>Cmtm5</i>    | NM_026066.2    | CKLF-like MARVEL transmembrane domain containing 5 (Cmtm5)                                        | 6.81 |
| <i>Cnp</i>      | NM_009923.1    | 2',3'-cyclic nucleotide 3' phosphodiesterase (Cnp)                                                | 1.67 |
| <i>Col22a1</i>  | XM_907370.3    | PREDICTED: collagen, type XXII, alpha 1, transcript variant 3 (Col22a1)                           | 1.93 |
| <i>Col8a2</i>   | NM_199473      |                                                                                                   | 1.95 |
| <i>Cox6b2</i>   | NM_183405.1    | cytochrome c oxidase subunit VIb polypeptide 2 (Cox6b2)                                           | 1.58 |
| <i>Cp</i>       | NM_007752      |                                                                                                   | 2.68 |
| <i>Cpe</i>      | NM_013494.2    |                                                                                                   | 1.74 |
| <i>Cpt1c</i>    | NM_153679.1    | carnitine palmitoyltransferase 1c (Cpt1c)                                                         | 1.60 |
| <i>Crip2</i>    | NM_024223.1    | cysteine rich protein 2 (Crip2)                                                                   | 1.55 |
| <i>Crtc3</i>    | NM_173863.2    | CREB regulated transcription coactivator 3 (Crtc3)                                                | 1.51 |
| <i>Cryab</i>    | NM_009964.1    | crystallin, alpha B (Cryab)                                                                       | 3.40 |
| <i>Crygs</i>    | NM_009967.1    | crystallin, gamma S (Crygs)                                                                       | 2.00 |
| <i>Csf1</i>     | NM_007778.3    | colony stimulating factor 1 (macrophage) (Csf1)                                                   | 2.24 |
| <i>Cspp1</i>    | NM_026493.3    | centrosome and spindle pole associated protein 1 (Cspp1)                                          | 1.61 |
| <i>Csrp1</i>    | NM_007791.4    | cysteine and glycine-rich protein 1 (Csrp1)                                                       | 1.57 |
| <i>Ctdsp2</i>   | NM_146012.1    | CTD (carboxy-terminal domain, RNA polymerase II, polypeptide A) small phosphatase 2 (Ctdsp2)      | 1.65 |
| <i>Ctnna2</i>   | NM_009819.1    | catenin (cadherin associated protein), alpha 2 (Ctnna2), transcript variant 2                     | 2.32 |
| <i>Ctnnal1</i>  | NM_018761.2    | catenin (cadherin associated protein), alpha-like 1 (Ctnnal1)                                     | 3.35 |
| <i>Ctns</i>     | NM_031251.4    | cystinosis, nephropathic (Ctns)                                                                   | 1.59 |
| <i>Ctsa</i>     | NM_001038492.1 | cathepsin A (Ctsa), transcript variant 2                                                          | 8.16 |
| <i>Ctsb</i>     | NM_007798.2    | cathepsin B (Ctsb)                                                                                | 2.19 |
| <i>Cxcl10</i>   | NM_021274.1    | chemokine (C-X-C motif) ligand 10 (Cxcl10)                                                        | 1.88 |
| <i>Cxcr4</i>    | NM_009911.2    |                                                                                                   | 3.50 |
| <i>Cyhr1</i>    | NM_180962.1    | cysteine and histidine rich 1 (Cyhr1), transcript variant 2                                       | 2.29 |
| <i>Cyld</i>     | NM_173369.1    | cyliindromatosis (turban tumor syndrome) (Cyld)                                                   | 1.72 |
| <i>Cyp1b1</i>   | NM_009994.1    | cytochrome P450, family 1, subfamily b, polypeptide 1 (Cyp1b1)                                    | 3.17 |
| <i>Cyp2j9</i>   | NM_028979.2    | cytochrome P450, family 2, subfamily j, polypeptide 9 (Cyp2j9)                                    | 1.62 |
| <i>Cyp4f13</i>  | NM_130882.1    | cytochrome P450, family 4, subfamily f, polypeptide 13 (Cyp4f13)                                  | 2.07 |
| <i>Cyp4f14</i>  | NM_022434.1    | cytochrome P450, family 4, subfamily f, polypeptide 14 (Cyp4f14)                                  | 3.05 |
| <i>Cyp4v3</i>   | NM_133969.2    | cytochrome P450, family 4, subfamily v, polypeptide 3 (Cyp4v3)                                    | 2.31 |

|                      |                |                                                                                                 |      |
|----------------------|----------------|-------------------------------------------------------------------------------------------------|------|
| <i>Cyp7b1</i>        | NM_007825.3    | cytochrome P450, family 7, subfamily b, polypeptide 1 (Cyp7b1)                                  | 1.76 |
| <i>Cyr61</i>         | NM_010516.1    | cysteine rich protein 61 (Cyr61)                                                                | 1.59 |
| <i>D030034I04Rik</i> | AK050914       |                                                                                                 | 1.51 |
| <i>D0H4S114</i>      | NM_053078.3    | DNA segment, human D4S114 (D0H4S114)                                                            | 2.60 |
| <i>D10Ert610e</i>    | NM_028027.2    | DNA segment, Chr 10, ERATO Doi 610, expressed (D10Ert610e)                                      | 2.06 |
| <i>D12Ert647e</i>    | NM_194068.1    | DNA segment, Chr 12, ERATO Doi 647, expressed (D12Ert647e), transcript variant 4                | 1.59 |
| <i>D15Mit260</i>     |                |                                                                                                 | 1.56 |
| <i>D16H22S680E</i>   | NM_138583.1    | DNA segment, Chr 16, human D22S680E, expressed (D16H22S680E)                                    | 1.67 |
| <i>D230005E09Rik</i> | AK051822       |                                                                                                 | 1.83 |
| <i>D330014H01Rik</i> | NM_177617.2    |                                                                                                 | 2.05 |
| <i>D430042O09Rik</i> | NM_001081022.1 | RIKEN cDNA D430042O09 gene (D430042O09Rik)                                                      | 2.43 |
| <i>D4Bwg1540e</i>    | NM_026257.1    |                                                                                                 | 1.64 |
| <i>D4Ert22e</i>      | NM_001025608.1 | DNA segment, Chr 4, ERATO Doi 22, expressed (D4Ert22e), transcript variant 1                    | 1.51 |
| <i>D4Ert681e</i>     |                |                                                                                                 | 2.03 |
| <i>D630003M21Rik</i> | NM_177657.2    | RIKEN cDNA D630003M21 gene (D630003M21Rik)                                                      | 1.57 |
| <i>D730039F16Rik</i> | NM_030021.1    | RIKEN cDNA D730039F16 gene (D730039F16Rik)                                                      | 1.61 |
| <i>D9Ert392e</i>     | NM_028181      |                                                                                                 | 2.14 |
| <i>Dapk1</i>         | NM_134062.1    | death associated protein kinase 1 (Dapk1), transcript variant 2                                 | 1.58 |
| <i>Darc</i>          | NM_010045.2    | Duffy blood group, chemokine receptor (Darc)                                                    | 1.94 |
| <i>Dbi</i>           | NM_007830.3    | diazepam binding inhibitor (Dbi), transcript variant 2                                          | 1.76 |
| <i>Dbp</i>           | NM_016974.1    | D site albumin promoter binding protein (Dbp)                                                   | 1.61 |
| <i>Dcun1d4</i>       | NM_178896.4    | DCN1, defective in cullin neddylation 1, domain containing 4 ( <i>S. cerevisiae</i> ) (Dcun1d4) | 1.54 |
| <i>Ddit4l</i>        | NM_030143.3    | DNA-damage-inducible transcript 4-like (Ddit4l)                                                 | 1.55 |
| <i>Ddo</i>           | NM_027442.3    | D-aspartate oxidase (Ddo)                                                                       | 6.50 |
| <i>Ddr1</i>          | NM_007584.2    | discoidin domain receptor family, member 1 (Ddr1), transcript variant 1                         | 2.58 |
| <i>Ddx3y</i>         | NM_012008.1    | DEAD (Asp-Glu-Ala-Asp) box polypeptide 3, Y-linked (Ddx3y)                                      | 1.62 |
| <i>Dedd2</i>         | NM_207677.3    | death effector domain-containing DNA binding protein 2 (Dedd2)                                  | 1.55 |
| <i>Dhrs1</i>         | NM_026819.2    | dehydrogenase/reductase (SDR family) member 1 (Dhrs1)                                           | 4.26 |
| <i>Dhx32</i>         | NM_133941.2    | DEAH (Asp-Glu-Ala-His) box polypeptide 32 (Dhx32)                                               | 1.93 |
| <i>Dido1</i>         | NM_011805.2    | death inducer-obliterator 1 (Dido1), transcript variant 1                                       | 1.52 |
| <i>Dixdc1</i>        | NM_178118      |                                                                                                 | 1.66 |
| <i>Dm15</i>          | NM_032418      |                                                                                                 | 1.87 |
| <i>Dnahc9</i>        | XM_917040.2    | PREDICTED: dynein, axonemal, heavy chain 9, transcript variant 5 (Dnahc9)                       | 1.64 |
| <i>Dnaic1</i>        | NM_175138.3    | dynein, axonemal, intermediate chain 1 (Dnaic1)                                                 | 1.61 |
| <i>Dnajb13</i>       | NM_153527.2    | DnaJ (Hsp40) related, subfamily B, member 13 (Dnajb13)                                          | 4.31 |
| <i>Dnajb2</i>        | NM_178055.3    | DnaJ (Hsp40) homolog, subfamily B, member 2 (Dnajb2), transcript variant 2                      | 2.03 |
| <i>Dnajb4</i>        | NM_025926.1    | DnaJ (Hsp40) homolog, subfamily B, member 4 (Dnajb4)                                            | 1.52 |
| <i>Dnajb9</i>        | NM_013760.3    | DnaJ (Hsp40) homolog, subfamily B, member 9 (Dnajb9)                                            | 1.66 |
| <i>Dnajc3</i>        | NM_008929.2    | DnaJ (Hsp40) homolog, subfamily C, member 3 (Dnajc3)                                            | 1.93 |
| <i>Dnali1</i>        | NM_175223.2    | dynein, axonemal, light intermediate polypeptide 1 (Dnali1)                                     | 3.48 |
| <i>Dner</i>          | NM_152915.1    | delta/notch-like EGF-related receptor (Dner)                                                    | 1.79 |
| <i>Dock6</i>         | NM_177030.3    | dedicator of cytokinesis 6 (Dock6)                                                              | 2.57 |
| <i>Dpysl5</i>        | NM_023047.2    | dihydropyrimidinase-like 5 (Dpysl5)                                                             | 2.89 |
| <i>Drp2</i>          | NM_010078.2    | dystrophin related protein 2 (Drp2)                                                             | 5.02 |
| <i>Dscr1</i>         | NM_019466.2    |                                                                                                 | 1.85 |
| <i>Dtna</i>          | NM_010087.3    | dystrobrevin alpha (Dtna), transcript variant 2                                                 | 1.53 |
| <i>Dtx4</i>          | NM_172442.2    | deltex 4 homolog ( <i>Drosophila</i> ) (Dtx4)                                                   | 1.76 |
| <i>Dync2li1</i>      | NM_172256.1    | dynein cytoplasmic 2 light intermediate chain 1 (Dync2li1)                                      | 2.33 |
| <i>Dynlrb2</i>       | NM_029297.1    | dynein light chain roadblock-type 2 (Dynlrb2)                                                   | 6.62 |
| <i>Dysf</i>          | NM_021469.2    | dysferlin (Dysf), transcript variant 1                                                          | 1.96 |
| <i>E130203B14Rik</i> | NM_178791.4    | RIKEN cDNA E130203B14 gene (E130203B14Rik)                                                      | 2.90 |
| <i>E330035H20Rik</i> | AK054516       |                                                                                                 | 1.65 |
| <i>E430002G05Rik</i> | NM_173749      |                                                                                                 | 4.40 |
| <i>E430013K19Rik</i> |                |                                                                                                 | 1.61 |
| <i>Ech1</i>          | NM_016772.1    | enoyl coenzyme A hydratase 1, peroxisomal (Ech1)                                                | 1.66 |
| <i>Ednra</i>         | NM_010332.2    | endothelin receptor type A (Ednra)                                                              | 2.00 |
| <i>Ednrb</i>         | NM_007904.2    | endothelin receptor type B (Ednrb)                                                              | 1.60 |
| <i>EG232599</i>      | NM_177689.3    | predicted gene, EG232599 (EG232599)                                                             | 1.93 |
| <i>EG433229</i>      | XM_899874.3    | PREDICTED: predicted gene, EG433229, transcript variant 7 (EG433229)                            | 1.66 |
| <i>EG546143</i>      | XM_620762.4    | PREDICTED: predicted gene, EG546143 (EG546143)                                                  | 2.43 |
| <i>EG630499</i>      | NM_001081015.1 | predicted gene, EG630499 (EG630499)                                                             | 1.62 |
| <i>EG632802</i>      | XM_978542.1    | PREDICTED: predicted gene, EG632802 (EG632802)                                                  | 2.20 |
| <i>EG665378</i>      | NM_001081746.1 | predicted gene, EG665378 (EG665378)                                                             | 3.03 |
| <i>Ei24</i>          | NM_007915      |                                                                                                 | 1.53 |
| <i>Endod1</i>        | NM_028013.2    | endonuclease domain containing 1 (Endod1)                                                       | 2.59 |
| <i>Enpp5</i>         | NM_032003.1    | ectonucleotide pyrophosphatase/phosphodiesterase 5 (Enpp5)                                      | 1.71 |
| <i>Entpd2</i>        | NM_009849.1    | ectonucleoside triphosphate diphosphohydrolase 2 (Entpd2)                                       | 5.54 |
| <i>Etl4</i>          | NM_001081006.1 | enhancer trap locus 4 (Etl4)                                                                    | 1.62 |

|                      |                |                                                                                                         |      |
|----------------------|----------------|---------------------------------------------------------------------------------------------------------|------|
| <i>F830002E14Rik</i> | AK089567       |                                                                                                         | 6.28 |
| <i>Fads3</i>         | NM_021890.3    | fatty acid desaturase 3 (Fads3)                                                                         | 1.88 |
| <i>Fah</i>           | NM_010176.2    | fumarylacetoacetate hydrolase (Fah)                                                                     | 1.84 |
| <i>Fam102a</i>       | NM_153560.4    | family with sequence similarity 102, member A (Fam102a)                                                 | 2.69 |
| <i>Fam129b</i>       | NM_146119.1    | family with sequence similarity 129, member B (Fam129b)                                                 | 1.79 |
| <i>Fam134b</i>       | NM_025459.2    | family with sequence similarity 134, member B (Fam134b), transcript variant 2                           | 3.72 |
| <i>Fam178a</i>       | NM_001081225.1 | family with sequence similarity 178, member A (Fam178a)                                                 | 1.64 |
| <i>Fam184a</i>       | NM_001081428.1 | family with sequence similarity 184, member A (Fam184a)                                                 | 3.08 |
| <i>Fam20a</i>        | NM_153782.1    | family with sequence similarity 20, member A (Fam20a)                                                   | 1.69 |
| <i>Fank1</i>         | NM_025850.2    | fibronectin type 3 and ankyrin repeat domains 1 (Fank1)                                                 | 1.80 |
| <i>Fas</i>           | NM_007987.1    | Fas (TNF receptor superfamily member 6) (Fas)                                                           | 4.91 |
| <i>Fbxo2</i>         | NM_176848.1    | F-box protein 2 (Fbxo2)                                                                                 | 8.52 |
| <i>Fbxo32</i>        | NM_026346.1    | F-box protein 32 (Fbxo32)                                                                               | 1.53 |
| <i>Fbxo44</i>        | NM_173401.2    | F-box protein 44 (Fbxo44)                                                                               | 1.74 |
| <i>Fcgrt</i>         | NM_010189      |                                                                                                         | 1.97 |
| <i>Fer1l3</i>        | XM_001480162.1 | PREDICTED: fer-1-like 3, myoferlin (C. elegans), transcript variant 1 (Fer1l3)                          | 2.16 |
| <i>Fez1</i>          | NM_183171.1    | fasciculation and elongation protein zeta 1 (zygin I) (Fez1)                                            | 1.76 |
| <i>Fez2</i>          | NM_199448.1    |                                                                                                         | 1.81 |
| <i>Fhl1</i>          | NM_001077361.1 | four and a half LIM domains 1 (Fhl1), transcript variant 1                                              | 2.54 |
| <i>Fhod1</i>         | NM_177699      |                                                                                                         | 1.52 |
| <i>Fin15</i>         | NM_008016.1    |                                                                                                         | 1.71 |
| <i>Flnb</i>          | NM_134080.1    | filamin, beta (Flnb)                                                                                    | 1.84 |
| <i>Fmn2</i>          | AK013585       |                                                                                                         | 1.57 |
| <i>Fn3k</i>          | NM_022014.2    | fructosamine 3 kinase (Fn3k), transcript variant 1                                                      | 2.12 |
| <i>Fnbp1</i>         | NM_001038700.1 | formin binding protein 1 (Fnbp1), transcript variant 1                                                  | 1.79 |
| <i>Folr1</i>         | NM_008034.2    | folate receptor 1 (adult) (Folr1)                                                                       | 1.64 |
| <i>Fos</i>           | NM_010234.2    | FBJ osteosarcoma oncogene (Fos)                                                                         | 2.68 |
| <i>Frm6</i>          | NM_028127.3    | FERM domain containing 6 (Frm6)                                                                         | 1.55 |
| <i>Fundc1</i>        | NM_028058.3    | FUN14 domain containing 1 (Fundc1)                                                                      | 1.93 |
| <i>Fyco1</i>         | NM_148925.1    | FYVE and coiled-coil domain containing 1 (Fyco1)                                                        | 1.81 |
| <i>Gab1</i>          | NM_021356.2    | growth factor receptor bound protein 2-associated protein 1 (Gab1)                                      | 3.05 |
| <i>Gabarapl1</i>     | NM_020590.4    | gamma-aminobutyric acid (GABA(A)) receptor-associated protein-like 1 (Gabarapl1)                        | 2.03 |
| <i>Gabbr1</i>        | NM_008069.4    | gamma-aminobutyric acid (GABA-A) receptor, subunit beta 1 (Gabbr1)                                      | 1.71 |
| <i>Galnt1</i>        | NM_001081421.1 | UDP-N-acetyl-alpha-D-galactosamine:polypeptide N-acetylgalactosaminyltransferase-like 1 (Galnt1)        | 3.77 |
| <i>Ganc</i>          | NM_172672.2    | glucosidase, alpha; neutral C (Ganc)                                                                    | 1.56 |
| <i>Garnl3</i>        | NM_178888.4    | GTPase activating RANGAP domain-like 3 (Garnl3)                                                         | 3.83 |
| <i>Gats</i>          | XM_289726.2    |                                                                                                         | 1.62 |
| <i>Gbp2</i>          | NM_010260.1    | guanylate binding protein 2 (Gbp2)                                                                      | 6.50 |
| <i>Gca</i>           | NM_145523.3    | grancalcin (Gca)                                                                                        | 1.79 |
| <i>Gcnt2</i>         | NM_133219.1    | glucosaminyl (N-acetyl) transferase 2, I-branching enzyme (Gcnt2), transcript variant 3                 | 1.76 |
| <i>Gdap111</i>       | NM_144891.1    | ganglioside-induced differentiation-associated protein 1-like 1 (Gdap111)                               | 1.54 |
| <i>Gdpd2</i>         | NM_023608.2    | glycerophosphodiester phosphodiesterase domain containing 2 (Gdpd2)                                     | 2.26 |
| <i>Gdpd5</i>         | NM_201352.2    | glycerophosphodiester phosphodiesterase domain containing 5 (Gdpd5)                                     | 1.50 |
| <i>Gfap</i>          | NM_010277      |                                                                                                         | 7.80 |
| <i>Ggnbp1</i>        | NM_027544.1    | gametogenetin binding protein 1 (Ggnbp1)                                                                | 2.04 |
| <i>Ggta1</i>         | NM_010283.1    | glycoprotein galactosyltransferase alpha 1, 3 (Ggta1)                                                   | 1.78 |
| <i>Gja1</i>          | NM_010288.2    | gap junction membrane channel protein alpha 1 (Gja1)                                                    | 2.36 |
| <i>Glb1l</i>         |                |                                                                                                         | 2.05 |
| <i>Glpr2</i>         | NM_027450      |                                                                                                         | 2.59 |
| <i>Glycam1</i>       | NM_008134.2    | glycosylation dependent cell adhesion molecule 1 (Glycam1)                                              | 2.21 |
| <i>Gm347</i>         | NM_001005420.1 | gene model 347, (NCBI) (Gm347)                                                                          | 1.56 |
| <i>Gm973</i>         | NM_001013771.2 | gene model 973, (NCBI) (Gm973)                                                                          | 2.89 |
| <i>Gmpr</i>          | NM_025508.3    | guanosine monophosphate reductase (Gmpr)                                                                | 1.78 |
| <i>Gnao1</i>         | NM_010308.3    | guanine nucleotide binding protein, alpha O (Gnao1), transcript variant A                               | 1.55 |
| <i>Gnptg</i>         | NM_172529.3    | N-acetylglucosamine-1-phosphotransferase, gamma subunit (Gnptg)                                         | 1.54 |
| <i>Golgb1</i>        | XM_001001861.2 | PREDICTED: golgi autoantigen, golgin subfamily b, macrogolgin 1, transcript variant 9 (Golgb1)          | 1.57 |
| <i>Gp38</i>          | NM_010329.1    |                                                                                                         | 1.84 |
| <i>Gpam</i>          | NM_008149.3    | glycerol-3-phosphate acyltransferase, mitochondrial (Gpam), nuclear gene encoding mitochondrial protein | 1.63 |
| <i>Gpc4</i>          | NM_008150.1    | glypican 4 (Gpc4)                                                                                       | 1.57 |
| <i>Gpld1</i>         | NM_008156.2    | glycosylphosphatidylinositol specific phospholipase D1 (Gpld1)                                          | 1.87 |
| <i>Gpr123</i>        | NM_177469.3    | G protein-coupled receptor 123 (Gpr123)                                                                 | 2.05 |
| <i>Gpr137b-ps</i>    | NR_003568.1    | G protein-coupled receptor 137B, pseudogene (Gpr137b-ps), non-coding RNA.                               | 1.56 |
| <i>Gpr17</i>         | NM_001025381.1 | G protein-coupled receptor 17 (Gpr17)                                                                   | 1.50 |
| <i>Gpr23</i>         | NM_175271      |                                                                                                         | 2.13 |
| <i>Gpr37l1</i>       | NM_134438.1    | G protein-coupled receptor 37-like 1 (Gpr37l1)                                                          | 3.20 |
| <i>Gprc5b</i>        | NM_022420.1    | G protein-coupled receptor, family C, group 5, member B (Gprc5b)                                        | 2.09 |

|                   |                |                                                                                                          |       |
|-------------------|----------------|----------------------------------------------------------------------------------------------------------|-------|
| <i>Gpx1</i>       | NM_008160.5    | glutathione peroxidase 1 (Gpx1)                                                                          | 2.78  |
| <i>Gpx4</i>       | NM_001037741.2 | glutathione peroxidase 4 (Gpx4), transcript variant 1                                                    | 1.87  |
| <i>Grhpr</i>      | NM_080289.1    | glyoxylate reductase/hydroxypyruvate reductase (Grhpr)                                                   | 2.10  |
| <i>Gria1</i>      | NM_008165.2    | glutamate receptor, ionotropic, AMPA1 (alpha 1) (Gria1)                                                  | 3.88  |
| <i>Grk4</i>       | NM_019497.2    | G protein-coupled receptor kinase 4 (Grk4), transcript variant 1                                         | 1.60  |
| <i>Gsta3</i>      | NM_010356.3    | glutathione S-transferase, alpha 3 (Gsta3), transcript variant 2                                         | 1.62  |
| <i>Gsta4</i>      | NM_010357.1    | glutathione S-transferase, alpha 4 (Gsta4)                                                               | 2.12  |
| <i>H13</i>        | NM_010376.3    | histocompatibility 13 (H13)                                                                              | 1.54  |
| <i>H2-D1</i>      | NM_010380.3    | histocompatibility 2, D region locus 1 (H2-D1)                                                           | 1.98  |
| <i>H2-K1</i>      | NM_001001892.2 | histocompatibility 2, K1, K region (H2-K1), transcript variant 1                                         | 1.66  |
| <i>Hbp1</i>       | NM_153198      |                                                                                                          | 1.62  |
| <i>Hc</i>         | NM_010406.1    | hemolytic complement (Hc)                                                                                | 1.97  |
| <i>Hdc</i>        | NM_008230.4    | histidine decarboxylase (Hdc)                                                                            | 4.30  |
| <i>Heg1</i>       | NM_172934.4    | HEG homolog 1 (zebrafish) (Heg1), transcript variant 2                                                   | 1.70  |
| <i>Herpud1</i>    | NM_022331.1    | homocysteine-inducible, endoplasmic reticulum stress-inducible, ubiquitin-like domain member 1 (Herpud1) | 1.61  |
| <i>Hexdc</i>      | NM_001001333.1 | hexosaminidase (glycosyl hydrolase family 20, catalytic domain) containing (Hexdc)                       | 1.64  |
| <i>Hexim1</i>     | NM_138753.2    | hexamethylene bis-acetamide inducible 1 (Hexim1)                                                         | 1.58  |
| <i>Hey1</i>       | NM_010423.2    | hairly/enhancer-of-split related with YRPW motif 1 (Hey1)                                                | 2.46  |
| <i>Hist1h2be</i>  | NM_178194.3    | histone cluster 1, H2be (Hist1h2be)                                                                      | 2.28  |
| <i>Hist1h4a</i>   | NM_178192.1    | histone cluster 1, H4a (Hist1h4a)                                                                        | 1.74  |
| <i>Hist1h4j</i>   | NM_178210.1    | histone cluster 1, H4j (Hist1h4j)                                                                        | 1.66  |
| <i>Hist2h2aa1</i> | NM_013549.1    | histone cluster 2, H2aa1 (Hist2h2aa1)                                                                    | 2.78  |
| <i>Hist2h2aa2</i> | NM_178212.1    | histone cluster 2, H2aa2 (Hist2h2aa2)                                                                    | 2.56  |
| <i>Hopx</i>       | NM_175606.2    | HOP homeobox (Hopx)                                                                                      | 3.50  |
| <i>Hrsp12</i>     | NM_008287.2    | heat-responsive protein 12 (Hrsp12)                                                                      | 3.31  |
| <i>Hsd3b2</i>     | NM_153193.2    | hydroxy-delta-5-steroid dehydrogenase, 3 beta- and steroid delta-isomerase 2 (Hsd3b2)                    | 3.94  |
| <i>Hspa2</i>      | NM_008301.4    | heat shock protein 2 (Hspa2), transcript variant 1                                                       | 2.29  |
| <i>Hspb8</i>      | NM_030704.1    | heat shock protein 8 (Hspb8)                                                                             | 9.66  |
| <i>Htatip2</i>    | NM_016865.2    | HIV-1 tat interactive protein 2, homolog (human) (Htatip2)                                               | 1.57  |
| <i>Id4</i>        | NM_031166.2    | inhibitor of DNA binding 4 (Id4)                                                                         | 4.70  |
| <i>ldh2</i>       | NM_173011.1    | isocitrate dehydrogenase 2 (NADP+), mitochondrial (ldh2), nuclear gene encoding mitochondrial protein    | 1.57  |
| <i>Ifit2</i>      | NM_008332.2    | interferon-induced protein with tetratricopeptide repeats 2 (Ifit2)                                      | 1.97  |
| <i>Ifit3</i>      | NM_010501.1    | interferon-induced protein with tetratricopeptide repeats 3 (Ifit3)                                      | 8.11  |
| <i>Ifngr2</i>     | NM_008338.2    | interferon gamma receptor 2 (Ifngr2)                                                                     | 2.15  |
| <i>Ift122</i>     | NM_031177.2    | intraflagellar transport 122 homolog (Chlamydomonas) (Ift122)                                            | 1.69  |
| <i>Ift172</i>     | NM_026298.4    | intraflagellar transport 172 homolog (Chlamydomonas) (Ift172)                                            | 1.72  |
| <i>Ift80</i>      | NM_026641.1    | intraflagellar transport 80 homolog (Chlamydomonas) (Ift80)                                              | 1.65  |
| <i>Ift81</i>      | NM_009879.2    | intraflagellar transport 81 homolog (Chlamydomonas) (Ift81)                                              | 2.18  |
| <i>Igfbp5</i>     | NM_010518.2    | insulin-like growth factor binding protein 5 (Igfbp5)                                                    | 18.71 |
| <i>Igfbp7</i>     | NM_008048.2    | insulin-like growth factor binding protein 7 (Igfbp7)                                                    | 2.78  |
| <i>IGFBPL</i>     | AK043464       |                                                                                                          | 1.60  |
| <i>Igfbpl1</i>    | NM_018741.2    | insulin-like growth factor binding protein-like 1 (Igfbpl1)                                              | 5.75  |
| <i>Igsf11</i>     | NM_170599.2    | immunoglobulin superfamily, member 11 (Igsf11)                                                           | 7.84  |
| <i>Igtp</i>       | NM_018738.3    | interferon gamma induced GTPase (Igtp)                                                                   | 1.92  |
| <i>Ihpk1</i>      | NM_013785.2    | inositol hexaphosphate kinase 1 (Ihpk1)                                                                  | 1.54  |
| <i>Iigp2</i>      | NM_019440.2    | interferon inducible GTPase 2 (Iigp2)                                                                    | 2.07  |
| <i>Il6st</i>      | NM_010560.2    | interleukin 6 signal transducer (Il6st)                                                                  | 3.06  |
| <i>Inpp5k</i>     | NM_008916.2    | inositol polyphosphate 5-phosphatase K (Inpp5k)                                                          | 2.88  |
| <i>Insl6</i>      | NM_013754.1    | insulin-like 6 (Insl6)                                                                                   | 1.93  |
| <i>Iqcb1</i>      | NM_177128.3    | IQ calmodulin-binding motif containing 1 (Iqcb1)                                                         | 1.65  |
| <i>Iqcg</i>       | NM_178378.2    | IQ motif containing G (Iqcg)                                                                             | 1.75  |
| <i>Iftg3</i>      | NM_207217.3    | integrin alpha FG-GAP repeat containing 3 (Iftg3)                                                        | 1.54  |
| <i>Itga3</i>      | NM_013565.2    | integrin alpha 3 (Itga3)                                                                                 | 3.26  |
| <i>Itgb4</i>      | NM_133663.2    | integrin beta 4 (Itgb4), transcript variant 2                                                            | 1.69  |
| <i>Itgb5</i>      | NM_010580.1    | integrin beta 5 (Itgb5)                                                                                  | 1.87  |
| <i>Itih3</i>      | NM_008407      |                                                                                                          | 3.82  |
| <i>Itm2b</i>      | NM_008410.1    | integral membrane protein 2B (Itm2b)                                                                     | 2.63  |
| <i>Itpk1</i>      | NM_172584.3    | inositol 1,3,4-triphosphate 5/6 kinase (Itpk1)                                                           | 1.56  |
| <i>Itpkb</i>      | XM_205854      |                                                                                                          | 2.50  |
| <i>Jakmip1</i>    | NM_178394.3    | janus kinase and microtubule interacting protein 1 (Jakmip1)                                             | 2.28  |
| <i>Kank4</i>      | NM_172872.2    | KN motif and ankyrin repeat domains 4 (Kank4)                                                            | 2.01  |
| <i>Kcna6</i>      | NM_013568.3    |                                                                                                          | 2.92  |
| <i>Kcnk2</i>      | NM_010607.1    | potassium channel, subfamily K, member 2 (Kcnk2)                                                         | 1.81  |
| <i>Khk</i>        | NM_008439.3    | ketoheokinase (Khk)                                                                                      | 1.60  |
| <i>Kif1c</i>      | NM_153103.2    | kinesin family member 1C (Kif1c)                                                                         | 1.97  |
| <i>Kif21a</i>     | NM_016705.2    | kinesin family member 21A (Kif21a)                                                                       | 2.52  |
| <i>Kif27</i>      | NM_175214.3    | kinesin family member 27 (Kif27)                                                                         | 1.59  |



|                     |                |                                                                                                                                           |       |
|---------------------|----------------|-------------------------------------------------------------------------------------------------------------------------------------------|-------|
| <i>Kif9</i>         | NM_010628.2    | kinesin family member 9 (Kif9)                                                                                                            | 1.51  |
| <i>Klhdc8b</i>      | NM_030075.1    | kelch domain containing 8B (Klhdc8b)                                                                                                      | 2.32  |
| <i>Klhdc9</i>       | NM_001033039.2 | kelch domain containing 9 (Klhdc9)                                                                                                        | 1.62  |
| <i>Klhl26</i>       | NM_172052.1    | kelch-like 26 (Drosophila) (Klhl26), transcript variant 1                                                                                 | 2.17  |
| <i>Kndc1</i>        | NM_177261.4    | kinase non-catalytic C-lobe domain (KIND) containing 1 (Kndc1)                                                                            | 7.75  |
| <i>Ky</i>           | NM_024291.3    | kyphoscoliosis peptidase (Ky)                                                                                                             | 2.09  |
| <i>Lamb2</i>        | NM_008483.2    | laminin, beta 2 (Lamb2)                                                                                                                   | 2.27  |
| <i>Lamp2</i>        | NM_001017959.1 | lysosomal-associated membrane protein 2 (Lamp2), transcript variant 1                                                                     | 1.53  |
| <i>Lbp</i>          | NM_008489.2    | lipopolysaccharide binding protein (Lbp)                                                                                                  | 3.16  |
| <i>Lcn2</i>         | NM_008491.1    | lipocalin 2 (Lcn2)                                                                                                                        | 10.93 |
| <i>Lgals3</i>       | NM_010705.2    | lectin, galactose binding, soluble 3 (Lgals3)                                                                                             | 10.89 |
| <i>Lgals4</i>       | NM_010706.1    | lectin, galactose binding, soluble 4 (Lgals4)                                                                                             | 1.79  |
| <i>Lgi2</i>         | NM_144945.2    | leucine-rich repeat LGI family, member 2 (Lgi2)                                                                                           | 1.89  |
| <i>Limk2</i>        | NM_001034030.1 | LIM motif-containing protein kinase 2 (Limk2), transcript variant 3                                                                       | 1.94  |
| <i>Lix1</i>         | NM_025681.2    | limb expression 1 homolog (chicken) (Lix1)                                                                                                | 1.87  |
| <i>LOC100041569</i> | XM_001476596.1 | PREDICTED: hypothetical protein LOC100041569 (LOC100041569)                                                                               | 1.52  |
| <i>LOC100043798</i> | XM_001481083.1 | PREDICTED: hypothetical protein LOC100043798 (LOC100043798)                                                                               | 1.51  |
| <i>LOC100043821</i> | XM_001481017.1 | PREDICTED: hypothetical protein LOC100043821 (LOC100043821)                                                                               | 2.42  |
| <i>LOC100044124</i> | XM_001474702.1 | PREDICTED: similar to Nedd4 binding protein 2 (LOC100044124)                                                                              | 1.77  |
| <i>LOC100044177</i> | XM_001471637.1 | PREDICTED: hypothetical protein LOC100044177 (LOC100044177)                                                                               | 3.16  |
| <i>LOC100045005</i> | XR_031422.1    | PREDICTED: similar to Deltex3 (LOC100045005), misc RNA.                                                                                   | 2.07  |
| <i>LOC100045501</i> | XM_001474411.1 | PREDICTED: hypothetical protein LOC100045501 (LOC100045501)                                                                               | 1.78  |
| <i>LOC100045680</i> | XM_001475152.1 | PREDICTED: similar to complement C4 (LOC100045680)                                                                                        | 1.90  |
| <i>LOC100045864</i> | XR_032055.1    | PREDICTED: similar to HLA-G protein (LOC100045864), misc RNA.                                                                             | 1.65  |
| <i>LOC100045869</i> | XM_001475055.1 | PREDICTED: similar to Limb expression 1 homolog (chicken) (LOC100045869)                                                                  | 4.71  |
| <i>LOC100046120</i> | XM_001475611.1 | PREDICTED: similar to clusterin (LOC100046120)                                                                                            | 11.41 |
| <i>LOC100046207</i> | XM_001475801.1 | PREDICTED: similar to Lymphocyte antigen 6H precursor (Ly-6H) (LOC100046207)                                                              | 2.83  |
| <i>LOC100046690</i> | XM_001476775.1 | PREDICTED: hypothetical protein LOC100046690 (LOC100046690)                                                                               | 1.54  |
| <i>LOC100046741</i> | XM_001476728.1 | PREDICTED: similar to red-1 (LOC100046741)                                                                                                | 4.78  |
| <i>LOC100047126</i> | XM_001477492.1 | PREDICTED: similar to Sctr protein, transcript variant 1 (LOC100047126)                                                                   | 2.18  |
| <i>LOC100047193</i> | XR_033770.1    | PREDICTED: similar to kinesin family member 9 (LOC100047193), misc RNA.                                                                   | 1.93  |
| <i>LOC100047214</i> | XM_001477665.1 | PREDICTED: similar to PTEN induced putative kinase 1 (LOC100047214)                                                                       | 3.64  |
| <i>LOC100047226</i> | XR_033502.1    | PREDICTED: hypothetical protein LOC100047226 (LOC100047226), misc RNA.                                                                    | 1.59  |
| <i>LOC100047264</i> | XM_001477759.1 | PREDICTED: hypothetical protein LOC100047264 (LOC100047264)                                                                               | 1.93  |
| <i>LOC100047674</i> | XM_001478657.1 | PREDICTED: similar to solute carrier family 35 (UDP-glucuronic acid/UDP-N-acetylgalactosamine dual transporter), member D1 (LOC100047674) | 1.94  |
| <i>LOC100047738</i> | XM_001478788.1 | PREDICTED: similar to DENN/MADD domain containing 1A (LOC100047738)                                                                       | 2.47  |
| <i>LOC100047856</i> | XM_001479297.1 | PREDICTED: similar to calponin 3, acidic (LOC100047856)                                                                                   | 1.61  |
| <i>LOC100047936</i> | XR_033905.1    | PREDICTED: similar to sortilin-related receptor, LDLR class A repeats-containing (LOC100047936), misc RNA.                                | 2.54  |
| <i>LOC100048083</i> | XR_034387.1    | PREDICTED: similar to Tect2 (LOC100048083), misc RNA.                                                                                     | 1.99  |
| <i>LOC100048331</i> | XR_034509.1    | PREDICTED: similar to DnaJ (Hsp40) homolog, subfamily A, member 4 (LOC100048331), misc RNA.                                               | 2.03  |
| <i>LOC100048534</i> | XM_001480785.1 | PREDICTED: similar to D19Erttd652e protein (LOC100048534)                                                                                 | 1.80  |
| <i>LOC234987</i>    | XM_134668.2    |                                                                                                                                           | 1.64  |
| <i>LOC331595</i>    | XM_284853.2    |                                                                                                                                           | 1.75  |
| <i>LOC380653</i>    | XM_354560.1    |                                                                                                                                           | 1.91  |
| <i>LOC381000</i>    | XM_354911.1    |                                                                                                                                           | 2.91  |
| <i>LOC381105</i>    | XM_355021.1    |                                                                                                                                           | 1.78  |
| <i>LOC381132</i>    | XM_355049.1    |                                                                                                                                           | 2.60  |
| <i>LOC381150</i>    | XM_358516.1    |                                                                                                                                           | 1.53  |
| <i>LOC381260</i>    | XM_355202.1    |                                                                                                                                           | 1.79  |
| <i>LOC381738</i>    | XM_355721.1    |                                                                                                                                           | 3.25  |
| <i>LOC381739</i>    | XM_358649.1    |                                                                                                                                           | 1.84  |
| <i>LOC382050</i>    | XM_356123.1    |                                                                                                                                           | 1.55  |
| <i>LOC382163</i>    | XM_356263.1    |                                                                                                                                           | 2.75  |
| <i>LOC382237</i>    | XM_356351.1    |                                                                                                                                           | 1.79  |
| <i>LOC382308</i>    | XM_358725.1    |                                                                                                                                           | 1.51  |
| <i>LOC383154</i>    | XM_356900.1    |                                                                                                                                           | 1.85  |
| <i>LOC385256</i>    | XM_358153.1    |                                                                                                                                           | 2.23  |
| <i>LOC385274</i>    | XM_358163.1    |                                                                                                                                           | 2.07  |
| <i>LOC385825</i>    | XM_358960.1    |                                                                                                                                           | 1.72  |
| <i>LOC385877</i>    | XM_358981.1    |                                                                                                                                           | 1.54  |
| <i>LOC386005</i>    | XM_359031.1    |                                                                                                                                           | 3.37  |
| <i>LOC386021</i>    | XM_359035.1    |                                                                                                                                           | 1.61  |
| <i>LOC386078</i>    | XM_359058.1    |                                                                                                                                           | 1.73  |
| <i>LOC386085</i>    | XM_359063.1    |                                                                                                                                           | 1.66  |

|                  |                |                                                                                                   |      |
|------------------|----------------|---------------------------------------------------------------------------------------------------|------|
| <i>LOC386169</i> | XM_359104.1    |                                                                                                   | 2.19 |
| <i>LOC386218</i> | XM_359123.1    |                                                                                                   | 1.61 |
| <i>LOC386233</i> | XM_359128.1    |                                                                                                   | 1.70 |
| <i>LOC386256</i> | XM_359142.1    |                                                                                                   | 1.65 |
| <i>LOC386405</i> | XM_359211.1    |                                                                                                   | 1.55 |
| <i>LOC633360</i> | XM_907756.3    | PREDICTED: hypothetical LOC633360 (LOC633360)                                                     | 1.67 |
| <i>LOC633966</i> | XM_908539.2    | PREDICTED: similar to guanine nucleotide binding protein-like 2 (nucleolar) (LOC633966)           | 1.54 |
| <i>LOC638935</i> | XM_915139.3    | PREDICTED: similar to peptidylarginine deiminase, type II (LOC638935)                             | 1.70 |
| <i>LOC667370</i> | XM_001480084.1 | PREDICTED: similar to interferon-induced protein with tetratricopeptide repeats 3 (LOC667370)     | 2.71 |
| <i>LOC675572</i> | XM_001481199.1 | PREDICTED: hypothetical LOC675572 (LOC675572)                                                     | 7.85 |
| <i>LOC677369</i> | XR_005046.1    | PREDICTED: similar to Alpha-2-macroglobulin (LOC677369), misc RNA.                                | 3.29 |
| <i>LOC677375</i> | XM_001002943.1 | PREDICTED: hypothetical LOC677375 (LOC677375)                                                     | 2.34 |
| <i>Lrp2</i>      | NM_001081088.1 | low density lipoprotein receptor-related protein 2 (Lrp2)                                         | 3.57 |
| <i>Lrrc23</i>    | NM_013588.1    | leucine rich repeat containing 23 (Lrrc23)                                                        | 1.69 |
| <i>Lrrc36</i>    | NM_001033371.2 | leucine rich repeat containing 36 (Lrrc36)                                                        | 1.69 |
| <i>Lrrc48</i>    | NM_029044.1    | leucine rich repeat containing 48 (Lrrc48)                                                        | 2.28 |
| <i>Lrrc51</i>    | XM_890234.2    | PREDICTED: leucine rich repeat containing 51, transcript variant 2 (Lrrc51)                       | 2.23 |
| <i>Lrrc8</i>     | NM_177725.2    |                                                                                                   | 2.20 |
| <i>Lrrn4cl</i>   | NM_001013019.2 | LRRN4 C-terminal like (Lrrn4cl)                                                                   | 1.57 |
| <i>Luzp2</i>     | NM_178705.5    | leucine zipper protein 2 (Luzp2)                                                                  | 1.60 |
| <i>Lxn</i>       | NM_016753.4    | latexin (Lxn)                                                                                     | 2.44 |
| <i>Macf1</i>     | XM_110503      |                                                                                                   | 1.62 |
| <i>Macrod1</i>   | NM_134147.3    | MACRO domain containing 1 (Macrod1)                                                               | 2.11 |
| <i>Man1c1</i>    | NM_207237      |                                                                                                   | 1.55 |
| <i>Map1lc3b</i>  | NM_026160.3    | microtubule-associated protein 1 light chain 3 beta (Map1lc3b)                                    | 1.92 |
| <i>Map3k7ip2</i> | NM_138667.2    | mitogen-activated protein kinase kinase kinase 7 interacting protein 2 (Map3k7ip2)                | 1.88 |
| <i>Mapk1ip1</i>  | NM_001045483.1 | mitogen-activated protein kinase 1 interacting protein 1 (Mapk1ip1), transcript variant 1         | 1.53 |
| <i>Mapt</i>      | NM_010838.2    |                                                                                                   | 1.97 |
| <i>March 2</i>   | NM_145486.4    | membrane-associated ring finger (C3HC4) 2 (March2)                                                | 1.60 |
| <i>Matn4</i>     | NM_013592.2    | matrilin 4 (Matn4)                                                                                | 2.50 |
| <i>Mdh1b</i>     | NM_029696.3    | malate dehydrogenase 1B, NAD (soluble) (Mdh1b)                                                    | 2.09 |
| <i>Med25</i>     | NM_029365.1    | mediator of RNA polymerase II transcription, subunit 25 homolog (yeast) (Med25)                   | 1.50 |
| <i>Mfsd7b</i>    | NM_001081259.1 | major facilitator superfamily domain containing 7B (Mfsd7b)                                       | 4.93 |
| <i>Mgmt</i>      | NM_008598.1    |                                                                                                   | 1.64 |
| <i>Mgst1</i>     | NM_019946.4    | microsomal glutathione S-transferase 1 (Mgst1)                                                    | 2.54 |
| <i>Mia1</i>      | NM_019394      |                                                                                                   | 1.75 |
| <i>Mib2</i>      | NM_145124.2    | mindbomb homolog 2 (Drosophila) (Mib2)                                                            | 1.72 |
| <i>Mid1ip1</i>   | NM_026524.2    | Mid1 interacting protein 1 (gastrulation specific G12-like (zebrafish)) (Mid1ip1)                 | 2.04 |
| <i>Mif4gd</i>    | NM_027162.3    | MIF4G domain containing (Mif4gd)                                                                  | 1.79 |
| <i>Mkrn1</i>     | NM_018810.2    | makorin, ring finger protein, 1 (Mkrn1)                                                           | 1.63 |
| <i>Mks1</i>      | NM_001039684.2 | Meckel syndrome, type 1 (Mks1)                                                                    | 1.69 |
| <i>Mlf1</i>      | NM_001039543.1 | myeloid leukemia factor 1 (Mlf1), transcript variant 1                                            | 2.32 |
| <i>Mmd2</i>      | NM_175217.6    | monocyte to macrophage differentiation-associated 2 (Mmd2)                                        | 4.55 |
| <i>Mmp11</i>     | NM_008606.2    | matrix metalloproteinase 11 (Mmp11)                                                               | 1.81 |
| <i>Mobkl2b</i>   | NM_178061.4    | MOB1, Mps One Binder kinase activator-like 2B (yeast) (Mobkl2b)                                   | 1.65 |
| <i>Morn2</i>     | NM_194269.1    | MORN repeat containing 2 (Morn2)                                                                  | 2.02 |
| <i>Morn5</i>     | NM_029309.2    | MORN repeat containing 5 (Morn5)                                                                  | 1.94 |
| <i>Mpdz</i>      | NM_010820.2    | multiple PDZ domain protein (Mpdz)                                                                | 1.67 |
| <i>Mpp6</i>      | NM_019939.1    | membrane protein, palmitoylated 6 (MAGUK p55 subfamily member 6) (Mpp6)                           | 2.93 |
| <i>Msi2h</i>     | AK031365       |                                                                                                   | 1.65 |
| <i>Mt2</i>       | NM_008630.2    | metallothionein 2 (Mt2)                                                                           | 3.06 |
| <i>Mt3</i>       | NM_013603.1    | metallothionein 3 (Mt3)                                                                           | 3.73 |
| <i>Mtap6</i>     | NM_001043355.2 | microtubule-associated protein 6 (Mtap6), transcript variant 3                                    | 1.52 |
| <i>Mvp</i>       | NM_080638.1    | major vault protein (Mvp)                                                                         | 2.00 |
| <i>Myadm</i>     | NM_016969.1    | myeloid-associated differentiation marker (Myadm)                                                 | 3.42 |
| <i>Myo1e</i>     | NM_181072      |                                                                                                   | 1.75 |
| <i>Myo7a</i>     | NM_008663.2    | myosin VIIa (Myo7a)                                                                               | 1.50 |
| <i>Myst4</i>     | NM_017479.2    | MYST histone acetyltransferase monocytic leukemia 4 (Myst4)                                       | 1.56 |
| <i>Nacc2</i>     | NM_001037098.1 | nucleus accumbens associated 2, BEN and BTB (POZ) domain containing (Nacc2), transcript variant 2 | 1.65 |
| <i>Nbl1</i>      | NM_008675.1    | neuroblastoma, suppression of tumorigenicity 1 (Nbl1)                                             | 4.82 |
| <i>Ndrp1</i>     | NM_008681.2    | N-myc downstream regulated gene 1 (Ndrp1)                                                         | 2.53 |
| <i>Ndrp2</i>     | NM_013864      |                                                                                                   | 7.25 |
| <i>Ndr1</i>      | NM_008681      |                                                                                                   | 2.39 |
| <i>Ndst1</i>     | NM_008306      |                                                                                                   | 1.56 |

|                                    |                |                                                                                                           |       |
|------------------------------------|----------------|-----------------------------------------------------------------------------------------------------------|-------|
| <i>Nedd4l</i>                      | NM_031881.1    | neural precursor cell expressed, developmentally down-regulated gene 4-like (Nedd4l)                      | 1.90  |
| <i>Nedd9</i>                       | NM_017464.2    | neural precursor cell expressed, developmentally down-regulated gene 9 (Nedd9)                            | 1.56  |
| <i>Nek5</i>                        | NM_177898.4    | NIMA (never in mitosis gene a)-related expressed kinase 5 (Nek5)                                          | 1.62  |
| <i>Nek9</i>                        | NM_145138.1    | NIMA (never in mitosis gene a)-related expressed kinase 9 (Nek9)                                          | 1.57  |
| <i>Nfkbia</i>                      | NM_010907      |                                                                                                           | 1.58  |
| <i>Ngef</i>                        | NM_019867      |                                                                                                           | 3.57  |
| <i>Nicn1</i>                       | NM_025449.2    | nicolin 1 (Nicn1)                                                                                         | 1.58  |
| <i>Nid2</i>                        | NM_008695.2    | nidogen 2 (Nid2)                                                                                          | 2.85  |
| <i>Nme5</i>                        | NM_080637.3    | non-metastatic cells 5, protein expressed in (nucleoside-diphosphate kinase) (Nme5)                       | 5.98  |
| <i>Nme7</i>                        | NM_138314.2    | non-metastatic cells 7, protein expressed in (nucleoside-diphosphate kinase) (Nme7), transcript variant 1 | 1.66  |
| <i>Nope</i>                        | NM_020043.2    | neighbor of Punc E11 (Nope)                                                                               | 2.24  |
| <i>Npal3</i>                       | NM_028995.3    | NIPA-like domain containing 3 (Npal3)                                                                     | 3.09  |
| <i>Npr2</i>                        | NM_173788.3    | natriuretic peptide receptor 2 (Npr2)                                                                     | 1.61  |
| <i>Nrbp2</i>                       | NM_144847.1    | nuclear receptor binding protein 2 (Nrbp2)                                                                | 12.59 |
| <i>Nrxn3</i>                       | NM_172544.2    | neurexin III (Nrxn3)                                                                                      | 1.76  |
| <i>Ntrk2</i>                       | NM_008745.2    | neurotrophic tyrosine kinase, receptor, type 2 (Ntrk2), transcript variant 2                              | 2.00  |
| <i>Ntsr2</i>                       | NM_008747.2    | neurotensin receptor 2 (Ntsr2)                                                                            | 8.93  |
| <i>Nuak1</i>                       | NM_001004363.1 | NUAK family, SNF1-like kinase, 1 (Nuak1)                                                                  | 4.94  |
| <i>Nuak2</i>                       | NM_028778.3    | NUAK family, SNF1-like kinase, 2 (Nuak2)                                                                  | 3.56  |
| <i>Nudt10</i>                      | NM_001031664.1 | nudix (nucleoside diphosphate linked moiety X)-type motif 10 (Nudt10)                                     | 1.63  |
| <i>Nxn</i>                         | NM_008750.4    | nucleoredoxin (Nxn)                                                                                       | 4.17  |
| <i>Oasl2</i>                       | NM_011854.1    | 2'-5' oligoadenylate synthetase-like 2 (Oasl2)                                                            | 1.68  |
| <i>Oat</i>                         | NM_016978.1    | ornithine aminotransferase (Oat)                                                                          | 2.37  |
| <i>Ogn</i>                         | NM_008760.2    | osteoglycin (Ogn)                                                                                         | 1.90  |
| <i>Olfm1</i>                       | NM_001038612.1 | olfactomedin 1 (Olfm1), transcript variant 2                                                              | 2.25  |
| <i>Olfml1</i>                      | NM_172907.2    | olfactomedin-like 1 (Olfml1)                                                                              | 3.11  |
| <i>Oplah</i>                       | NM_153122.2    | 5-oxoprolinase (ATP-hydrolysing) (Oplah)                                                                  | 2.19  |
| <i>Orc3l</i>                       | NM_015824.3    | origin recognition complex, subunit 3-like (S. cerevisiae) (Orc3l)                                        | 1.78  |
| <i>Ormdl3</i>                      | NM_025661.3    | ORM1-like 3 (S. cerevisiae) (Ormdl3)                                                                      | 1.73  |
| <i>Osbp15</i>                      | NM_024289      |                                                                                                           | 3.29  |
| <i>Osmr</i>                        | NM_011019.1    | oncostatin M receptor (Osmr)                                                                              | 2.60  |
| <i>OTTMUSG00000025-NR_003564.1</i> |                | predicted gene, OTTMUSG00000025408 (OTTMUSG00000025408), non-coding RNA.                                  | 3.57  |
| <i>Pacrg</i>                       | NM_027032.2    | Park2 co-regulated (Pacrg)                                                                                | 5.00  |
| <i>Pacs2</i>                       | NM_001081170.1 | phosphofurin acidic cluster sorting protein 2 (Pacs2)                                                     | 1.88  |
| <i>Padi2</i>                       | NM_008812.1    | peptidyl arginine deiminase, type II (Padi2)                                                              | 1.81  |
| <i>Palld</i>                       | XM_974582.1    | PREDICTED: palladin, cytoskeletal associated protein, transcript variant 4 (Palld)                        | 1.99  |
| <i>Palm</i>                        | NM_023128.2    | paralemmin (Palm)                                                                                         | 2.05  |
| <i>Paqr7</i>                       | NM_027995.2    | progesterin and adiponQ receptor family member VII (Paqr7)                                                | 1.74  |
| <i>Parp14</i>                      | NM_001039530.1 | poly (ADP-ribose) polymerase family, member 14 (Parp14)                                                   | 1.55  |
| <i>Parp4</i>                       | XM_994286.2    | PREDICTED: poly (ADP-ribose) polymerase family, member 4 (Parp4)                                          | 1.54  |
| <i>Pawr</i>                        | NM_054056.2    | PRKC, apoptosis, WT1, regulator (Pawr)                                                                    | 2.91  |
| <i>Pbx1</i>                        | NM_183355.2    | pre B-cell leukemia transcription factor 1 (Pbx1), transcript variant a                                   | 1.58  |
| <i>Pcbp4</i>                       | NM_021567.2    | poly(rC) binding protein 4 (Pcbp4)                                                                        | 1.90  |
| <i>Pcdh10</i>                      | NM_011043.3    | protocadherin 10 (Pcdh10), transcript variant 4                                                           | 1.66  |
| <i>Pcyt1b</i>                      | NM_177546.2    | phosphate cytidylyltransferase 1, choline, beta isoform (Pcyt1b), transcript variant 2                    | 1.59  |
| <i>Pdgfrl</i>                      | NM_026840.2    | platelet-derived growth factor receptor-like (Pdgfrl)                                                     | 1.64  |
| <i>Pdk4</i>                        | NM_013743.2    | pyruvate dehydrogenase kinase, isoenzyme 4 (Pdk4)                                                         | 1.54  |
| <i>Pdlim2</i>                      | NM_145978.1    | PDZ and LIM domain 2 (Pdlim2)                                                                             | 2.38  |
| <i>Pdlim7</i>                      | NM_026131      |                                                                                                           | 1.87  |
| <i>Pdzrn3</i>                      | NM_018884.1    | PDZ domain containing RING finger 3 (Pdzrn3)                                                              | 2.24  |
| <i>Pea15</i>                       | NM_008556.1    |                                                                                                           | 1.69  |
| <i>Peli2</i>                       | NM_033602      |                                                                                                           | 2.18  |
| <i>Pfkfb2</i>                      | NM_008825.3    | 6-phosphofructo-2-kinase/fructose-2,6-biphosphatase 2 (Pfkfb2)                                            | 1.65  |
| <i>Pfkfb4</i>                      | NM_173019.5    | 6-phosphofructo-2-kinase/fructose-2,6-biphosphatase 4 (Pfkfb4)                                            | 1.98  |
| <i>Pfkl</i>                        | NM_008826.3    | phosphofructokinase, liver, B-type (Pfkl)                                                                 | 1.56  |
| <i>Pgpep1</i>                      | NM_023217.2    | pyroglutamyl-peptidase I (Pgpep1)                                                                         | 1.95  |
| <i>Phkg1</i>                       | NM_011079.2    | phosphorylase kinase gamma 1 (Phkg1)                                                                      | 3.53  |
| <i>Phxr4</i>                       | NM_008835.1    |                                                                                                           | 2.16  |
| <i>Pik3ip1</i>                     | NM_178149.4    | phosphoinositide-3-kinase interacting protein 1 (Pik3ip1)                                                 | 2.63  |
| <i>Pitpnm2</i>                     | NM_011256.1    | phosphatidylinositol transfer protein, membrane-associated 2 (Pitpnm2)                                    | 2.93  |
| <i>Pitpnm3</i>                     | NM_001024927.2 | PITPNM family member 3 (Pitpnm3), transcript variant 1                                                    | 1.67  |
| <i>Pkd2</i>                        | NM_008861.2    | polycystic kidney disease 2 (Pkd2)                                                                        | 1.66  |
| <i>Pkmyt1</i>                      | NM_023058.3    | protein kinase, membrane associated tyrosine/threonine 1 (Pkmyt1)                                         | 1.52  |
| <i>Pkp2</i>                        | NM_026163.1    | plakophilin 2 (Pkp2)                                                                                      | 1.74  |

|                  |                |                                                                                                                                           |      |
|------------------|----------------|-------------------------------------------------------------------------------------------------------------------------------------------|------|
| <i>Pkp4</i>      | NM_175464.2    | plakophilin 4 (Pkp4), transcript variant 2                                                                                                | 1.86 |
| <i>Pla2g15</i>   | NM_133792.2    | phospholipase A2, group XV (Pla2g15)                                                                                                      | 1.68 |
| <i>Pla2g7</i>    | NM_013737.2    | phospholipase A2, group VII (platelet-activating factor acetylhydrolase, plasma) (Pla2g7)                                                 | 4.20 |
| <i>Plcd1</i>     | NM_019676.1    |                                                                                                                                           | 2.01 |
| <i>Plcd4</i>     | NM_001081456.1 | phospholipase C, delta 4 (Plcd4), transcript variant 1                                                                                    | 2.04 |
| <i>Plce1</i>     | NM_019588.2    | phospholipase C, epsilon 1 (Plce1)                                                                                                        | 1.60 |
| <i>Pld2</i>      | NM_008876.2    | phospholipase D2 (Pld2)                                                                                                                   | 1.61 |
| <i>Plekha2</i>   | NM_031257.2    | pleckstrin homology domain-containing, family A (phosphoinositide binding specific) member 2 (Plekha2)                                    | 1.87 |
| <i>Plekha1</i>   | NM_013746.1    | pleckstrin homology domain containing, family B (evectins) member 1 (Plekha1)                                                             | 3.58 |
| <i>Plekhm3</i>   | NM_001039493.1 | pleckstrin homology domain containing, family M, member 3 (Plekhm3)                                                                       | 1.56 |
| <i>Plp1</i>      | NM_011123.2    | proteolipid protein (myelin) 1 (Plp1)                                                                                                     | 1.50 |
| <i>Plscr2</i>    | NM_008880.2    | phospholipid scramblase 2 (Plscr2)                                                                                                        | 2.25 |
| <i>Plscr4</i>    | NM_178711.2    |                                                                                                                                           | 2.33 |
| <i>Pltp</i>      | NM_011125.2    | phospholipid transfer protein (Pltp)                                                                                                      | 2.08 |
| <i>Plxdc1</i>    | NM_028199.2    | plexin domain containing 1 (Plxdc1)                                                                                                       | 2.40 |
| <i>Plxnb1</i>    | NM_172775.1    | plexin B1 (Plxnb1)                                                                                                                        | 1.69 |
| <i>Pnma2</i>     | NM_175498.3    | paraneoplastic antigen MA2 (Pnma2)                                                                                                        | 2.60 |
| <i>Podxl</i>     | NM_013723.2    | podocalyxin-like (Podxl)                                                                                                                  | 1.81 |
| <i>Porcn</i>     | NM_145908.1    | porcupine homolog (Drosophila) (Porcn), transcript variant Mporc-b                                                                        | 1.51 |
| <i>Ppap2a</i>    | NM_008247.2    | phosphatidic acid phosphatase 2a (Ppap2a), transcript variant 1                                                                           | 1.77 |
| <i>Ppap2b</i>    | NM_080555.2    | phosphatidic acid phosphatase type 2B (Ppap2b)                                                                                            | 2.00 |
| <i>Ppapdc2</i>   | NM_028922.2    | phosphatidic acid phosphatase type 2 domain containing 2 (Ppapdc2)                                                                        | 1.71 |
| <i>Ppil6</i>     | XM_994766.1    | PREDICTED: peptidylprolyl isomerase (cyclophilin)-like 6, transcript variant 2 (Ppil6)                                                    | 2.19 |
| <i>Ppm2c</i>     | NM_001098231.1 | protein phosphatase 2C, magnesium dependent, catalytic subunit (Ppm2c), nuclear gene encoding mitochondrial protein, transcript variant 1 | 5.03 |
| <i>Ppp1r13b</i>  | NM_011625.1    | protein phosphatase 1, regulatory (inhibitor) subunit 13B (Ppp1r13b)                                                                      | 1.50 |
| <i>Ppp1r1b</i>   | NM_144828.1    | protein phosphatase 1, regulatory (inhibitor) subunit 1B (Ppp1r1b)                                                                        | 2.07 |
| <i>Ppp2r2b</i>   | NM_028392.2    | protein phosphatase 2 (formerly 2A), regulatory subunit B (PR 52), beta isoform (Ppp2r2b), transcript variant 2                           | 4.33 |
| <i>Pqlc3</i>     | NM_172574.1    | PQ loop repeat containing (Pqlc3)                                                                                                         | 1.81 |
| <i>Prdm16</i>    | NM_027504.3    | PR domain containing 16 (Prdm16)                                                                                                          | 1.64 |
| <i>Prdx6</i>     | NM_007453.3    | peroxiredoxin 6 (Prdx6)                                                                                                                   | 1.90 |
| <i>Prelp</i>     | NM_054077.3    | proline arginine-rich end leucine-rich repeat (Prelp)                                                                                     | 9.89 |
| <i>Prf1</i>      | NM_011073.2    | perforin 1 (pore forming protein) (Prf1)                                                                                                  | 2.62 |
| <i>Prkcdp</i>    | NM_028444.1    | protein kinase C, delta binding protein (Prkcdp)                                                                                          | 1.57 |
| <i>Prnp</i>      | NM_011170.1    | prion protein (Prnp)                                                                                                                      | 1.92 |
| <i>Prodh</i>     | NM_011172.1    |                                                                                                                                           | 2.57 |
| <i>Prom</i>      | AK029921       |                                                                                                                                           | 2.10 |
| <i>Prosapip1</i> | NM_197945.2    | ProSAPiP1 protein (Prosapip1)                                                                                                             | 2.07 |
| <i>Prps2</i>     | NM_026662.4    | phosphoribosyl pyrophosphate synthetase 2 (Prps2)                                                                                         | 1.74 |
| <i>Psap</i>      | NM_011179.2    | prosaposin (Psap)                                                                                                                         | 1.62 |
| <i>Psd2</i>      | NM_028707.3    | pleckstrin and Sec7 domain containing 2 (Psd2)                                                                                            | 7.68 |
| <i>Psg23</i>     | NM_020261.2    | pregnancy-specific glycoprotein 23 (Psg23)                                                                                                | 1.57 |
| <i>Pstpip1</i>   | NM_011193.1    | proline-serine-threonine phosphatase-interacting protein 1 (Pstpip1)                                                                      | 1.65 |
| <i>Punc</i>      | NM_008988.2    | putative neuronal cell adhesion molecule (Punc)                                                                                           | 2.24 |
| <i>Pvalb</i>     | NM_013645.3    | parvalbumin (Pvalb)                                                                                                                       | 6.87 |
| <i>Pygb</i>      | NM_153781.1    | brain glycogen phosphorylase (Pygb)                                                                                                       | 5.82 |
| <i>Rab11b</i>    | NM_008997.3    | RAB11B, member RAS oncogene family (Rab11b)                                                                                               | 1.95 |
| <i>Rab11fip4</i> | NM_175543      |                                                                                                                                           | 2.29 |
| <i>Rab32</i>     | NM_026405.3    | RAB32, member RAS oncogene family (Rab32)                                                                                                 | 1.57 |
| <i>Rab3d</i>     | NM_031874.4    | RAB3D, member RAS oncogene family (Rab3d)                                                                                                 | 1.92 |
| <i>Rab6b</i>     | NM_173781.3    |                                                                                                                                           | 1.61 |
| <i>Rab711</i>    | NM_144875.1    | RAB7, member RAS oncogene family-like 1 (Rab711)                                                                                          | 1.60 |
| <i>Rabl2a</i>    | NM_026817.3    | RAB, member of RAS oncogene family-like 2A (Rabl2a)                                                                                       | 1.80 |
| <i>Rabl5</i>     | NM_026073.2    |                                                                                                                                           | 1.51 |
| <i>Rage</i>      | NM_011973.2    | renal tumor antigen (Rage)                                                                                                                | 2.20 |
| <i>Ralgps1</i>   | NM_175211      |                                                                                                                                           | 2.08 |
| <i>Rapgef3</i>   | NM_144850.1    | Rap guanine nucleotide exchange factor (GEF) 3 (Rapgef3)                                                                                  | 1.96 |
| <i>Rarres2</i>   | NM_027852.2    | retinoic acid receptor responder (tazarotene induced) 2 (Rarres2)                                                                         | 1.79 |
| <i>Rassf4</i>    | NM_178045.3    | Ras association (RalGDS/AF-6) domain family member 4 (Rassf4)                                                                             | 6.70 |
| <i>Rcsd1</i>     | NM_178593.3    | RCSD domain containing 1 (Rcsd1), transcript variant 1                                                                                    | 1.99 |
| <i>Rdh5</i>      | NM_134006.4    | retinol dehydrogenase 5 (Rdh5)                                                                                                            | 2.62 |
| <i>Reep1</i>     | NM_178608.2    | receptor accessory protein 1 (Reep1)                                                                                                      | 1.81 |
| <i>Reep5</i>     | NM_007874.2    | receptor accessory protein 5 (Reep5)                                                                                                      | 2.14 |
| <i>Reln</i>      | NM_011261.2    | reelin (Reln)                                                                                                                             | 3.28 |
| <i>Retsat</i>    | NM_026159.4    | retinol saturase (all trans retinol 13,14 reductase) (Retsat)                                                                             | 1.51 |
| <i>Rftn2</i>     | NM_028713.1    | raftlin family member 2 (Rftn2)                                                                                                           | 1.97 |

|                       |                |                                                                                                                           |      |
|-----------------------|----------------|---------------------------------------------------------------------------------------------------------------------------|------|
| <i>Rfx2</i>           | NM_009056.1    | regulatory factor X, 2 (influences HLA class II expression) (Rfx2)                                                        | 4.18 |
| <i>Rgl2</i>           | NM_009059.2    | ral guanine nucleotide dissociation stimulator-like 2 (Rgl2)                                                              | 1.86 |
| <i>Rgma</i>           | NM_177740.4    | RGM domain family, member A (Rgma)                                                                                        | 2.33 |
| <i>Rgs4</i>           | NM_009062.3    | regulator of G-protein signaling 4 (Rgs4)                                                                                 | 1.68 |
| <i>Rgs9</i>           | NM_011268.2    | regulator of G-protein signaling 9 (Rgs9)                                                                                 | 1.89 |
| <i>Rhbdl2</i>         | NM_183163.2    | rhomboid, veinlet-like 2 (Drosophila) (Rhbdl2)                                                                            | 2.51 |
| <i>Rhob</i>           | NM_007483.2    | ras homolog gene family, member B (Rhob)                                                                                  | 2.36 |
| <i>Rhou</i>           | NM_133955.3    | ras homolog gene family, member U (Rhou)                                                                                  | 1.69 |
| <i>Rhpn1</i>          | NM_008164.1    | rhopilin, Rho GTPase binding protein 1 (Rhpn1)                                                                            | 1.52 |
| <i>Rhpn2</i>          | NM_027897.3    | rhopilin, Rho GTPase binding protein 2 (Rhpn2)                                                                            | 2.51 |
| <i>Rin2</i>           | NM_028724.2    | Ras and Rab interactor 2 (Rin2)                                                                                           | 1.83 |
| <i>Rln1</i>           | NM_011272.1    | relaxin 1 (Rln1)                                                                                                          | 1.65 |
| <i>Rnase1</i>         | NM_011271.2    | ribonuclease, RNase A family, 1 (pancreatic) (Rnase1)                                                                     | 2.65 |
| <i>Rnf167</i>         | NM_027445.1    | ring finger protein 167 (Rnf167)                                                                                          | 1.68 |
| <i>Rnf19a</i>         | NM_013923.2    | ring finger protein 19A (Rnf19a)                                                                                          | 1.61 |
| <i>Rorc</i>           | NM_011281.1    | RAR-related orphan receptor gamma (Rorc)                                                                                  | 1.75 |
| <i>Rpgr</i>           | NM_011285.1    | retinitis pigmentosa GTPase regulator (Rpgr)                                                                              | 1.75 |
| <i>Rps6ka5</i>        | NM_153587.2    | ribosomal protein S6 kinase, polypeptide 5 (Rps6ka5)                                                                      | 1.65 |
| <i>Rshl3</i>          | XM_137041.6    | PREDICTED: radial spokehead-like 3 (Rshl3)                                                                                | 4.55 |
| <i>Rsph1</i>          | NM_025290.3    | radial spoke head 1 homolog (Chlamydomonas) (Rsph1)                                                                       | 2.98 |
| <i>Rtn1</i>           | NM_001007596.1 | reticulon 1 (Rtn1), transcript variant 2                                                                                  | 1.89 |
| <i>S100a1</i>         | NM_011309.3    | S100 calcium binding protein A1 (S100a1)                                                                                  | 2.35 |
| <i>S100a13</i>        | NM_009113.3    | S100 calcium binding protein A13 (S100a13)                                                                                | 1.56 |
| <i>S100a6</i>         | NM_011313.2    | S100 calcium binding protein A6 (calcyclin) (S100a6)                                                                      | 4.52 |
| <i>S3-12</i>          | NM_020568.2    | plasma membrane associated protein, S3-12 (S3-12)                                                                         | 1.54 |
| <i>Sall2</i>          | NM_015772.2    | sal-like 2 (Drosophila) (Sall2)                                                                                           | 1.67 |
| <i>Samd9l</i>         | XM_620286.3    | PREDICTED: sterile alpha motif domain containing 9-like, transcript variant 1 (Samd9l)                                    | 3.18 |
| <i>Scd4</i>           | NM_183216.3    | stearoyl-coenzyme A desaturase 4 (Scd4)                                                                                   | 2.11 |
| <i>Scg3</i>           | NM_009130.1    | secretogranin III (Scg3)                                                                                                  | 4.33 |
| <i>Scg5</i>           | NM_009162.3    | secretogranin V (Scg5)                                                                                                    | 1.68 |
| <i>scl0002540.1_6</i> | AK019418.1     |                                                                                                                           | 2.61 |
| <i>scl0003799.1_2</i> | AK076154.1     |                                                                                                                           | 1.97 |
| <i>Sdc2</i>           | NM_008304.2    | syndecan 2 (Sdc2)                                                                                                         | 2.18 |
| <i>Sema4g</i>         | NM_011976.1    | sema domain, immunoglobulin domain (Ig), transmembrane domain (TM) and short cytoplasmic domain, (semaphorin) 4G (Sema4g) | 1.66 |
| <i>Sema6d</i>         | NM_172537.2    | sema domain, transmembrane domain (TM), and cytoplasmic domain, (semaphorin) 6D (Sema6d), transcript variant 1            | 2.04 |
| <i>Serpina3n</i>      | NM_009252.2    | serine (or cysteine) peptidase inhibitor, clade A, member 3N (Serpina3n)                                                  | 6.59 |
| <i>Serpib6a</i>       | NM_009254.2    | serine (or cysteine) peptidase inhibitor, clade B, member 6a (Serpib6a)                                                   | 3.46 |
| <i>Serping1</i>       | NM_009776.1    | serine (or cysteine) peptidase inhibitor, clade G, member 1 (Serping1)                                                    | 2.15 |
| <i>Sesn1</i>          | NM_001013370.1 | sestrin 1 (Sesn1)                                                                                                         | 2.89 |
| <i>Sft2d2</i>         | NM_145512.3    | SFT2 domain containing 2 (Sft2d2)                                                                                         | 1.62 |
| <i>Sfxn5</i>          | NM_178639.2    | sideroflexin 5 (Sfxn5)                                                                                                    | 2.55 |
| <i>Sh3bp5l</i>        | NM_024480.3    | SH3 binding domain protein 5 like (Sh3bp5l)                                                                               | 1.58 |
| <i>Shisa4</i>         | NM_175259.4    | shisa homolog 4 (Xenopus laevis) (Shisa4)                                                                                 | 2.07 |
| <i>Shroom2</i>        | NM_172441.2    | shroom family member 2 (Shroom2)                                                                                          | 1.71 |
| <i>Shroom3</i>        | NM_001077596.1 | shroom family member 3 (Shroom3), transcript variant 3                                                                    | 3.15 |
| <i>Sidt2</i>          | NM_172257.3    | SID1 transmembrane family, member 2 (Sidt2)                                                                               | 1.52 |
| <i>Sirpa</i>          | NM_007547.2    | signal-regulatory protein alpha (Sirpa)                                                                                   | 1.80 |
| <i>Sirt2</i>          | NM_022432.3    | sirtuin 2 (silent mating type information regulation 2, homolog) 2 (S. cerevisiae) (Sirt2)                                | 2.08 |
| <i>Sirt3</i>          | NM_022433.1    | sirtuin 3 (silent mating type information regulation 2, homolog) 3 (S. cerevisiae) (Sirt3)                                | 1.70 |
| <i>Slc15a2</i>        | XM_147213.1    |                                                                                                                           | 1.70 |
| <i>Slc16a9</i>        | NM_025807.1    | solute carrier family 16 (monocarboxylic acid transporters), member 9 (Slc16a9)                                           | 1.78 |
| <i>Slc22a4</i>        | NM_019687.3    | solute carrier family 22 (organic cation transporter), member 4 (Slc22a4)                                                 | 3.22 |
| <i>Slc22a5</i>        | NM_011396.2    | solute carrier family 22 (organic cation transporter), member 5 (Slc22a5)                                                 | 1.63 |
| <i>Slc24a4</i>        | NM_172152      |                                                                                                                           | 1.73 |
| <i>Slc25a18</i>       | NM_001081048.1 | solute carrier family 25 (mitochondrial carrier), member 18 (Slc25a18)                                                    | 2.19 |
| <i>Slc26a3</i>        | AK018566       |                                                                                                                           | 1.80 |
| <i>Slc29a3</i>        | NM_023596.3    | solute carrier family 29 (nucleoside transporters), member 3 (Slc29a3)                                                    | 1.69 |
| <i>Slc2a1</i>         | NM_011400.2    | solute carrier family 2 (facilitated glucose transporter), member 1 (Slc2a1)                                              | 3.79 |
| <i>Slc38a2</i>        | NM_175121.3    | solute carrier family 38, member 2 (Slc38a2)                                                                              | 2.15 |
| <i>Slc38a3</i>        | NM_023805.2    | solute carrier family 38, member 3 (Slc38a3)                                                                              | 1.90 |
| <i>Slc39a12</i>       | NM_001012305.1 | solute carrier family 39 (zinc transporter), member 12 (Slc39a12)                                                         | 5.12 |
| <i>Slc39a13</i>       | NM_026721.2    | solute carrier family 39 (metal ion transporter), member 13 (Slc39a13)                                                    | 1.73 |
| <i>Slc39a4</i>        | NM_028064.2    | solute carrier family 39 (zinc transporter), member 4 (Slc39a4)                                                           | 1.93 |
| <i>Slc44a2</i>        | NM_152808.2    | solute carrier family 44, member 2 (Slc44a2)                                                                              | 2.40 |
| <i>Slc46a3</i>        | NM_027872.3    | solute carrier family 46, member 3 (Slc46a3)                                                                              | 2.38 |

|                 |                |                                                                                                                                   |      |
|-----------------|----------------|-----------------------------------------------------------------------------------------------------------------------------------|------|
| <i>Slc6a8</i>   | NM_133987.1    | solute carrier family 6 (neurotransmitter transporter, creatine), member 8 (Slc6a8)                                               | 1.61 |
| <i>Slc7a3</i>   | NM_007515.2    | solute carrier family 7 (cationic amino acid transporter, y+ system), member 3 (Slc7a3)                                           | 1.55 |
| <i>Slc8a1</i>   | NM_011406.1    |                                                                                                                                   | 1.71 |
| <i>Slco1a5</i>  | NM_130861.2    | solute carrier organic anion transporter family, member 1a5 (Slco1a5)                                                             | 1.66 |
| <i>Smad1</i>    | NM_008539.3    | MAD homolog 1 (Drosophila) (Smad1)                                                                                                | 1.55 |
| <i>Smarca2</i>  | NM_011416.2    | SWI/SNF related, matrix associated, actin dependent regulator of chromatin, subfamily a, member 2 (Smarca2), transcript variant 1 | 1.64 |
| <i>Smoc1</i>    | NM_022316.1    | SPARC related modular calcium binding 1 (Smoc1)                                                                                   | 1.58 |
| <i>Snopc3</i>   | NM_029949.1    | small nuclear RNA activating complex, polypeptide 3 (Snopc3)                                                                      | 1.51 |
| <i>Snph</i>     | NM_198214.2    | syntaphilin (Snph)                                                                                                                | 2.82 |
| <i>Snta1</i>    | NM_009228.1    | syntrophin, acidic 1 (Snta1)                                                                                                      | 3.16 |
| <i>Sntg2</i>    | NM_172951.1    | syntrophin, gamma 2 (Sntg2)                                                                                                       | 1.80 |
| <i>Soat1</i>    | NM_009230.3    | sterol O-acyltransferase 1 (Soat1)                                                                                                | 1.89 |
| <i>Sobp</i>     | NM_175407.3    | sine oculis-binding protein homolog (Drosophila) (Sobp)                                                                           | 2.04 |
| <i>Socs3</i>    | NM_007707.2    | suppressor of cytokine signaling 3 (Socs3)                                                                                        | 1.85 |
| <i>Sorbs1</i>   | NM_009166.3    | sorbin and SH3 domain containing 1 (Sorbs1), transcript variant 1                                                                 | 2.44 |
| <i>Sorl1</i>    | NM_011436.3    | sortilin-related receptor, LDLR class A repeats-containing (Sorl1)                                                                | 1.81 |
| <i>Sox21</i>    | NM_145464.1    | SRY-box containing gene 21 (Sox21)                                                                                                | 1.58 |
| <i>Sox6</i>     | AK084290       |                                                                                                                                   | 1.59 |
| <i>Sox9</i>     | NM_011448      |                                                                                                                                   | 2.64 |
| <i>Spag1</i>    | NM_012031.1    | sperm associated antigen 1 (Spag1)                                                                                                | 1.54 |
| <i>Spag6</i>    | NM_015773.1    | sperm associated antigen 6 (Spag6)                                                                                                | 3.99 |
| <i>Spata13</i>  | XM_147847.4    |                                                                                                                                   | 1.69 |
| <i>Spg20</i>    | NM_144895      |                                                                                                                                   | 1.72 |
| <i>Spnb2</i>    | NM_175836.2    | spectrin beta 2 (Spnb2), transcript variant 1                                                                                     | 1.59 |
| <i>Spop</i>     | NM_025287.2    | speckle-type POZ protein (Spop)                                                                                                   | 2.27 |
| <i>Srgap3</i>   | NM_080448.4    | SLIT-ROBO Rho GTPase activating protein 3 (Srgap3)                                                                                | 3.59 |
| <i>Srl</i>      | NM_175347.4    | sarcalumenin (Srl)                                                                                                                | 2.88 |
| <i>Srr</i>      | AK080830       |                                                                                                                                   | 2.22 |
| <i>Sstr2</i>    | NM_009217.1    |                                                                                                                                   | 1.77 |
| <i>St5</i>      | NM_001001326.1 | suppression of tumorigenicity 5 (St5), transcript variant 1                                                                       | 2.29 |
| <i>St8sia2</i>  | NM_009181.1    | ST8 alpha-N-acetyl-neuraminide alpha-2,8-sialyltransferase 2 (St8sia2)                                                            | 2.18 |
| <i>Stard10</i>  | NM_019990.4    | START domain containing 10 (Stard10)                                                                                              | 1.74 |
| <i>Stard13</i>  | NM_146258.1    | StAR-related lipid transfer (START) domain containing 13 (Stard13)                                                                | 1.87 |
| <i>Stard8</i>   | NM_199018.1    | START domain containing 8 (Stard8)                                                                                                | 4.58 |
| <i>Stk36</i>    | NM_175031.3    | serine/threonine kinase 36 (fused homolog, Drosophila) (Stk36)                                                                    | 2.01 |
| <i>Stxbp2</i>   | NM_011503.2    |                                                                                                                                   | 1.69 |
| <i>Sulf1</i>    | NM_172294.1    | sulfatase 1 (Sulf1)                                                                                                               | 3.02 |
| <i>Svop</i>     | NM_026805.1    | SV2 related protein (Svop)                                                                                                        | 1.91 |
| <i>Syap1</i>    | NM_025932.1    | synapse associated protein 1 (Syap1)                                                                                              | 2.82 |
| <i>Synm</i>     | NM_183312.3    | synemin, intermediate filament protein (Synm), transcript variant 3                                                               | 2.10 |
| <i>Tagln3</i>   | NM_019754.3    | transgelin 3 (Tagln3)                                                                                                             | 2.29 |
| <i>Tap2</i>     | NM_011530.2    | transporter 2, ATP-binding cassette, sub-family B (MDR/TAP) (Tap2)                                                                | 2.27 |
| <i>Tbc1d2b</i>  | NM_194334.2    | TBC1 domain family, member 2B (Tbc1d2b)                                                                                           | 1.87 |
| <i>Tbcel</i>    | NM_173038.3    | tubulin folding cofactor E-like (Tbcel)                                                                                           | 3.17 |
| <i>Tceal6</i>   | NM_025355.2    | transcription elongation factor A (SII)-like 6 (Tceal6)                                                                           | 1.88 |
| <i>Tcfcp2l1</i> | NM_023755.2    | transcription factor CP2-like 1 (Tcfcp2l1)                                                                                        | 2.37 |
| <i>Tecta</i>    | NM_009347.1    | tectorin alpha (Tecta)                                                                                                            | 1.54 |
| <i>Tekt1</i>    | NM_011569.2    | tektin 1 (Tekt1)                                                                                                                  | 2.47 |
| <i>Tens1</i>    | XM_109868      |                                                                                                                                   | 1.60 |
| <i>Tex264</i>   | NM_011573.2    | testis expressed gene 264 (Tex264), transcript variant 1                                                                          | 1.67 |
| <i>Tgm2</i>     | NM_009373.3    | transglutaminase 2, C polypeptide (Tgm2)                                                                                          | 2.68 |
| <i>Thra</i>     | XM_126580.1    |                                                                                                                                   | 1.57 |
| <i>Timp2</i>    | NM_011594.3    | tissue inhibitor of metalloproteinase 2 (Timp2)                                                                                   | 3.06 |
| <i>Timp3</i>    | NM_011595.2    | tissue inhibitor of metalloproteinase 3 (Timp3)                                                                                   | 2.02 |
| <i>Tjp2</i>     | NM_011597.2    | tight junction protein 2 (Tjp2)                                                                                                   | 1.50 |
| <i>Tlr2</i>     | NM_011905.2    | toll-like receptor 2 (Tlr2)                                                                                                       | 2.11 |
| <i>Tlr3</i>     | NM_126166.4    | toll-like receptor 3 (Tlr3)                                                                                                       | 1.53 |
| <i>Tm2d2</i>    | NM_027194.2    | TM2 domain containing 2 (Tm2d2)                                                                                                   | 1.64 |
| <i>Tmem107</i>  | NM_025838.1    | transmembrane protein 107 (Tmem107), transcript variant 1                                                                         | 1.63 |
| <i>Tmem108</i>  | NM_178638.2    | transmembrane protein 108 (Tmem108)                                                                                               | 1.88 |
| <i>Tmem166</i>  | NM_145570.1    | transmembrane protein 166 (Tmem166)                                                                                               | 1.65 |
| <i>Tmem25</i>   | NM_027865.1    | transmembrane protein 25 (Tmem25)                                                                                                 | 1.83 |
| <i>Tmem43</i>   | NM_028766.2    | transmembrane protein 43 (Tmem43)                                                                                                 | 1.72 |
| <i>Tmem47</i>   | NM_138751.1    | transmembrane protein 47 (Tmem47)                                                                                                 | 4.11 |
| <i>Tmem50a</i>  | NM_027935.2    | transmembrane protein 50A (Tmem50a)                                                                                               | 1.74 |
| <i>Tmem66</i>   | NM_026432.2    | transmembrane protein 66 (Tmem66)                                                                                                 | 1.54 |
| <i>Tmie</i>     | NM_146260.2    | transmembrane inner ear (Tmie)                                                                                                    | 2.85 |
| <i>Tmod2</i>    | NM_001038710.1 | tropomodulin 2 (Tmod2), transcript variant 1                                                                                      | 1.82 |

|                   |                |                                                                                                 |       |
|-------------------|----------------|-------------------------------------------------------------------------------------------------|-------|
| <i>Tmtc4</i>      | NM_028651.2    | transmembrane and tetratricopeptide repeat containing 4 (Tmtc4)                                 | 1.53  |
| <i>Tmub1</i>      | NM_022418.1    | transmembrane and ubiquitin-like domain containing 1 (Tmub1)                                    | 1.66  |
| <i>Tnfrsf6</i>    | AK086933       |                                                                                                 | 1.51  |
| <i>Tns3</i>       | NM_001083587.1 | tensin 3 (Tns3)                                                                                 | 1.92  |
| <i>Tpbg</i>       | NM_011627.3    | trophoblast glycoprotein (Tpbg)                                                                 | 1.84  |
| <i>Tpp1</i>       | NM_009906.4    | tripeptidyl peptidase I (Tpp1)                                                                  | 2.04  |
| <i>Tppp3</i>      | NM_026481.2    | tubulin polymerization-promoting protein family member 3 (Tppp3)                                | 2.60  |
| <i>Tprgl</i>      | NM_026388.2    | transformation related protein 63 regulated like (Tprgl)                                        | 1.62  |
| <i>Tprkb</i>      | NM_176842.2    | Tp53rk binding protein (Tprkb)                                                                  | 2.06  |
| <i>Traf1</i>      | AK089281       |                                                                                                 | 6.20  |
| <i>Trip6</i>      | NM_011639.2    | thyroid hormone receptor interactor 6 (Trip6)                                                   | 1.72  |
| <i>Trp53inp1</i>  | NM_021897.1    | transformation related protein 53 inducible nuclear protein 1 (Trp53inp1)                       | 1.51  |
| <i>Trpc7</i>      | NM_012035.2    | transient receptor potential cation channel, subfamily C, member 7 (Trpc7)                      | 1.51  |
| <i>Trps1</i>      | AK036590       |                                                                                                 | 1.97  |
| <i>Tsc22d3</i>    | NM_001077364.1 | TSC22 domain family, member 3 (Tsc22d3), transcript variant 1                                   | 1.89  |
| <i>Tsc22d4</i>    | NM_023910.5    | TSC22 domain family, member 4 (Tsc22d4)                                                         | 2.23  |
| <i>Tspan14</i>    | NM_145928.1    | tetraspanin 14 (Tspan14)                                                                        | 1.82  |
| <i>Tspan15</i>    | NM_197996.2    | tetraspanin 15 (Tspan15)                                                                        | 2.48  |
| <i>Tspan17</i>    | NM_028841.1    | tetraspanin 17 (Tspan17)                                                                        | 2.69  |
| <i>Tspan6</i>     | NM_019656.3    | tetraspanin 6 (Tspan6)                                                                          | 1.59  |
| <i>Tst</i>        | NM_009437.4    | thiosulfate sulfurtransferase, mitochondrial (Tst), nuclear gene encoding mitochondrial protein | 1.64  |
| <i>Ttc17</i>      | NM_183106.2    | tetratricopeptide repeat domain 17 (Ttc17)                                                      | 1.54  |
| <i>Ttc30b</i>     | NM_028235.1    | tetratricopeptide repeat domain 30B (Ttc30b)                                                    | 3.37  |
| <i>Ttc8</i>       | NM_198311.1    | tetratricopeptide repeat domain 8 (Ttc8), transcript variant 2                                  | 1.52  |
| <i>Tll3</i>       | NM_133923.3    | tubulin tyrosine ligase-like family, member 3 (Tll3)                                            | 3.86  |
| <i>Ttyh1</i>      | NM_021324.4    | tweety homolog 1 (Drosophila) (Ttyh1), transcript variant 2                                     | 4.28  |
| <i>Ttyh2</i>      | NM_053273.2    | tweety homolog 2 (Drosophila) (Ttyh2)                                                           | 3.05  |
| <i>Tuba1a</i>     | NM_011653.1    | tubulin, alpha 1A (Tuba1a)                                                                      | 1.83  |
| <i>Tuba3a</i>     | NM_009446.2    | tubulin, alpha 3A (Tuba3a)                                                                      | 1.52  |
| <i>Tubb2c</i>     | NM_146116.1    | tubulin, beta 2c (Tubb2c)                                                                       | 1.72  |
| <i>Txnip</i>      | NM_001009935.2 | thioredoxin interacting protein (Txnip), transcript variant 1                                   | 2.96  |
| <i>Tyki</i>       | NM_020557.3    |                                                                                                 | 2.30  |
| <i>Uap111</i>     | NM_001033293.2 | UDP-N-acetylglucosamine pyrophosphorylase 1-like 1 (Uap111)                                     | 1.54  |
| <i>Ube2e2</i>     | NM_144839.1    | ubiquitin-conjugating enzyme E2E 2 (UBC4/5 homolog, yeast) (Ube2e2)                             | 1.51  |
| <i>Ugp2</i>       | NM_139297.4    | UDP-glucose pyrophosphorylase 2 (Ugp2)                                                          | 1.51  |
| <i>Ugt1a10</i>    | NM_201641.2    | UDP glycosyltransferase 1 family, polypeptide A10 (Ugt1a10)                                     | 3.77  |
| <i>Ugt1a6b</i>    | NM_201410.1    | UDP glucuronosyltransferase 1 family, polypeptide A6B (Ugt1a6b)                                 | 1.54  |
| <i>Unc45a</i>     | NM_133952.1    | unc-45 homolog A (C. elegans) (Unc45a)                                                          | 1.64  |
| <i>Usp20</i>      | NM_028846.3    | ubiquitin specific peptidase 20 (Usp20)                                                         | 1.56  |
| <i>Usp53</i>      | NM_133857.3    | ubiquitin specific peptidase 53 (Usp53)                                                         | 3.11  |
| <i>Vamp4</i>      | NM_016796.2    | vesicle-associated membrane protein 4 (Vamp4)                                                   | 1.50  |
| <i>Vasn</i>       | NM_139307.2    | vasorin (Vasn)                                                                                  | 2.17  |
| <i>Vim</i>        | NM_011701.3    | vimentin (Vim)                                                                                  | 1.63  |
| <i>Vps37b</i>     | NM_177876.4    | vacuolar protein sorting 37B (yeast) (Vps37b)                                                   | 1.57  |
| <i>Vps41</i>      | NM_172120.2    | vacuolar protein sorting 41 (yeast) (Vps41)                                                     | 1.57  |
| <i>Vwa5a</i>      | NM_172767.2    | von Willebrand factor A domain containing 5A (Vwa5a)                                            | 2.27  |
| <i>Wbscr27</i>    | NM_024479.2    | Williams Beuren syndrome chromosome region 27 (human) (Wbscr27)                                 | 1.54  |
| <i>Wdr16</i>      | NM_027963.2    | WD repeat domain 16 (Wdr16)                                                                     | 1.83  |
| <i>Wdr45</i>      | NM_172372.1    | WD repeat domain 45 (Wdr45)                                                                     | 1.57  |
| <i>Wdr60</i>      | NM_146039.3    | WD repeat domain 60 (Wdr60)                                                                     | 1.53  |
| <i>Wdr69</i>      | NM_027725.2    | WD repeat domain 69 (Wdr69)                                                                     | 2.94  |
| <i>Wdr78</i>      | NM_146254.2    | WD repeat domain 78 (Wdr78)                                                                     | 3.86  |
| <i>Wdr92</i>      | NM_178909.4    | WD repeat domain 92 (Wdr92)                                                                     | 1.64  |
| <i>Wisp2</i>      | NM_016873.1    | WNT1 inducible signaling pathway protein 2 (Wisp2)                                              | 1.74  |
| <i>Wwc1</i>       | NM_170779.1    | WW, C2 and coiled-coil domain containing 1 (Wwc1)                                               | 2.66  |
| <i>Wwp2</i>       | NM_025830.3    | WW domain containing E3 ubiquitin protein ligase 2 (Wwp2)                                       | 1.64  |
| <i>X99384</i>     | NM_013753.1    | cDNA sequence X99384 (X99384)                                                                   | 1.85  |
| <i>Ybx3</i>       | AK029441       |                                                                                                 | 1.50  |
| <i>Ypel3</i>      | NM_025347.1    | yippee-like 3 (Drosophila) (Ypel3)                                                              | 3.48  |
| <i>Zcchc18</i>    | NM_025893.2    | zinc finger, CCHC domain containing 18 (Zcchc18), transcript variant 3                          | 3.87  |
| <i>Zfp185</i>     | NM_009549.2    | zinc finger protein 185 (Zfp185)                                                                | 1.52  |
| <i>Zfp288</i>     | AK034574       |                                                                                                 | 3.26  |
| <i>Zfp36</i>      | NM_011756.4    | zinc finger protein 36 (Zfp36)                                                                  | 1.86  |
| <i>Zfp36l1</i>    | NM_007564.4    | zinc finger protein 36, C3H type-like 1 (Zfp36l1)                                               | 1.97  |
| <i>Zfp608</i>     | NM_175751.3    | zinc finger protein 608 (Zfp608)                                                                | 1.63  |
| <i>Zfp703</i>     | XM_912161.3    | PREDICTED: zinc finger protein 703 (Zfp703)                                                     | 1.79  |
| <i>Zfp91-cntf</i> | NM_001039718.1 | zinc finger protein 91, ciliary neurotrophic factor transcription unit (Zfp91-cntf)             | 12.63 |
| <i>Zhx1</i>       | NM_009572.3    | zinc fingers and homeoboxes 1 (Zhx1), transcript variant 1                                      | 1.62  |
| <i>Zmym3</i>      | NM_019831.2    | zinc finger, MYM-type 3 (Zmym3)                                                                 | 1.64  |
| <i>Zxda</i>       | NR_003292.1    | zinc finger, X-linked, duplicated A (Zxda), non-coding RNA.                                     | 2.80  |
