# Supplementary material for: miR-30 Family miRNAs Mediate the Effect of Chronic Social Defeat Stress on Hippocampal Neurogenesis in Mouse Depression Model
Source: PubMed Central journal article supplement (PMC6694739; doi:10.3389/fnmol.2019.00188), 2019-08-08
Supplement: Table_10.pdf [file Table_10.pdf]

**Table S10. List of genes, which demonstrated decreased expression (fold change  $\geq 1.5$  and  $p \leq 0.05$ ) in the differentiated cells from the late phase (day 7) when compared with the proliferating neurospheres**

| <u>Gene Symbol</u> | <u>Accession No.</u> | <u>Gene Definition</u>                                                       | <u>Fold Change</u> |
|--------------------|----------------------|------------------------------------------------------------------------------|--------------------|
| 0610007J10Rik      | AK018717             |                                                                              | 0.51               |
| 0610010F05Rik      | NM_027860            |                                                                              | 0.55               |
| 0610037L13Rik      | NM_028754.2          | RIKEN cDNA 0610037L13 gene (0610037L13Rik)                                   | 0.64               |
| 0910001A06Rik      | NM_144846.4          | RIKEN cDNA 0910001A06 gene (0910001A06Rik)                                   | 0.51               |
| 1100001F19Rik      | XM_124187.1          |                                                                              | 0.61               |
| 1110001A07Rik      | NM_025377.1          | RIKEN cDNA 1110001A07 gene (1110001A07Rik)                                   | 0.65               |
| 1110001C20Rik      | NM_177730            |                                                                              | 0.42               |
| 1110003F05Rik      |                      |                                                                              | 0.35               |
| 1110007M04Rik      | NM_026742.3          | RIKEN cDNA 1110007M04 gene (1110007M04Rik)                                   | 0.35               |
| 1110008F13Rik      | NM_026124.1          | RIKEN cDNA 1110008F13 gene (1110008F13Rik)                                   | 0.45               |
| 1110012D08Rik      | NM_178066.2          | RIKEN cDNA 1110012D08 gene (1110012D08Rik)                                   | 0.47               |
| 1110018J23Rik      | XM_140742.4          |                                                                              | 0.45               |
| 1110019N10Rik      | NM_026753.1          | RIKEN cDNA 1110019N10 gene (1110019N10Rik)                                   | 0.52               |
| 1110020P15Rik      | NM_197979.2          | RIKEN cDNA 1110020P15 gene (1110020P15Rik)                                   | 0.65               |
| 1110038B12Rik      | XM_922038.2          | PREDICTED: RIKEN cDNA 1110038B12 gene, transcript variant 6 (1110038B12Rik)  | 0.48               |
| 1110038D17Rik      | NM_175133.1          | RIKEN cDNA 1110038D17 gene (1110038D17Rik)                                   | 0.66               |
| 1110067D22Rik      | NM_173752.3          | RIKEN cDNA 1110067D22 gene (1110067D22Rik)                                   | 0.48               |
| 1110070O15Rik      | AK075684             |                                                                              | 0.63               |
| 1190002F15Rik      |                      |                                                                              | 0.53               |
| 1190009E20Rik      |                      |                                                                              | 0.54               |
| 1200003C05Rik      | NM_024205.1          | RIKEN cDNA 1200003C05 gene (1200003C05Rik)                                   | 0.48               |
| 1500001M20Rik      | NM_026894.1          | RIKEN cDNA 1500001M20 gene (1500001M20Rik)                                   | 0.54               |
| 1500012F01Rik      | NM_001081005.1       | RIKEN cDNA 1500012F01 gene (1500012F01Rik)                                   | 0.48               |
| 1500032D16Rik      | NM_001083891.1       | RIKEN cDNA 1500032D16 gene (1500032D16Rik), transcript variant 2             | 0.66               |
| 1500034J01Rik      | XM_912953.3          | PREDICTED: RIKEN cDNA 1500034J01 gene (1500034J01Rik)                        | 0.66               |
| 1600012H06Rik      | NM_001083882.1       | RIKEN cDNA 1600012H06 gene (1600012H06Rik), transcript variant 4             | 0.61               |
| 1700011E24Rik      | XM_128789.5          | PREDICTED: RIKEN cDNA 1700011E24 gene, transcript variant 2 (1700011E24Rik)  | 0.22               |
| 1700013A01Rik      | AK005934             |                                                                              | 0.65               |
| 1700021F05Rik      | NM_026411.1          | RIKEN cDNA 1700021F05 gene (1700021F05Rik)                                   | 0.67               |
| 1700025G04Rik      | NM_197990.2          | RIKEN cDNA 1700025G04 gene (1700025G04Rik)                                   | 0.31               |
| 1700027M01Rik      | NM_023544            |                                                                              | 0.66               |
| 1700029F09Rik      | XM_919077.2          | PREDICTED: RIKEN cDNA 1700029F09 gene, transcript variant 20 (1700029F09Rik) | 0.37               |
| 1700037H04Rik      | NM_026091.2          | RIKEN cDNA 1700037H04 gene (1700037H04Rik)                                   | 0.66               |
| 1700041B20Rik      | XM_485065            |                                                                              | 0.52               |
| 1700052N19Rik      | NM_024261.2          | RIKEN cDNA 1700052N19 gene (1700052N19Rik)                                   | 0.65               |
| 1700086L19Rik      | XM_358420.3          | PREDICTED: RIKEN cDNA 1700086L19 gene (1700086L19Rik)                        | 0.53               |
| 1700113I22Rik      | NM_026865.2          | RIKEN cDNA 1700113I22 gene (1700113I22Rik)                                   | 0.48               |
| 1810006K21Rik      | XM_983803.1          | PREDICTED: RIKEN cDNA 1810006K21 gene (1810006K21Rik)                        | 0.60               |
| 1810022K09Rik      | XM_485210            |                                                                              | 0.60               |
| 1810055G02Rik      | NM_028077.2          | RIKEN cDNA 1810055G02 gene (1810055G02Rik)                                   | 0.41               |
| 1810074P20Rik      | NM_026194.3          | RIKEN cDNA 1810074P20 gene (1810074P20Rik)                                   | 0.66               |
| 2010003J03Rik      | NM_027236.1          | RIKEN cDNA 2010003J03 gene (2010003J03Rik)                                   | 0.63               |
| 2010107E04Rik      | NM_027360.2          | RIKEN cDNA 2010107E04 gene (2010107E04Rik)                                   | 0.60               |
| 2010309L07Rik      |                      |                                                                              | 0.65               |
| 2010317E24Rik      | XM_130053.2          |                                                                              | 0.48               |
| 2010321I05Rik      |                      |                                                                              | 0.58               |
| 2010321M09Rik      | NM_175153.3          | RIKEN cDNA 2010321M09 gene (2010321M09Rik), transcript variant 1             | 0.59               |
| 2210412D01Rik      | NM_133722.1          | RIKEN cDNA 2210412D01 gene (2210412D01Rik)                                   | 0.59               |
| 2300002D11Rik      | NM_001081156.1       | RIKEN cDNA 2300002D11 gene (2300002D11Rik)                                   | 0.62               |
| 2310003L22Rik      | NM_027093.3          | RIKEN cDNA 2310003L22 gene (2310003L22Rik)                                   | 0.62               |
| 2310005E10Rik      | NM_172398.3          | RIKEN cDNA 2310005E10 gene (2310005E10Rik)                                   | 0.44               |
| 2310008M10Rik      | NM_025509.2          | RIKEN cDNA 2310008M10 gene (2310008M10Rik)                                   | 0.62               |
| 2310009B15Rik      | NM_001081226.1       | RIKEN cDNA 2310009B15 gene (2310009B15Rik)                                   | 0.59               |
| 2310011G17Rik      |                      |                                                                              | 0.62               |
| 2310014H01Rik      | XM_001003622.2       | PREDICTED: RIKEN cDNA 2310014H01 gene, transcript variant 3 (2310014H01Rik)  | 0.36               |
| 2310016C08Rik      | NM_023516.3          | RIKEN cDNA 2310016C08 gene (2310016C08Rik)                                   | 0.41               |
| 2310036D04Rik      | XM_488563            |                                                                              | 0.60               |
| 2310037I24Rik      | NM_133714.2          | RIKEN cDNA 2310037I24 gene (2310037I24Rik)                                   | 0.62               |
| 2310039H08Rik      | NM_025966.3          | RIKEN cDNA 2310039H08 gene (2310039H08Rik)                                   | 0.64               |
| 2310044H10Rik      | NM_197991            |                                                                              | 0.62               |
| 2310045K21Rik      | AK009823             |                                                                              | 0.53               |
| 2400010C15Rik      | AK010307             |                                                                              | 0.60               |

|               |                |                                                                              |      |
|---------------|----------------|------------------------------------------------------------------------------|------|
| 2410003K15Rik | XM_132537.3    |                                                                              | 0.42 |
| 2410006H16Rik | XM_001479267.1 | PREDICTED: RIKEN cDNA 2410006H16 gene (2410006H16Rik)                        | 0.65 |
| 2410015N17Rik | NM_023203.1    | RIKEN cDNA 2410015N17 gene (2410015N17Rik)                                   | 0.33 |
| 2410016O06Rik | NM_023633      |                                                                              | 0.63 |
| 2510009E07Rik | NM_001001881.1 | RIKEN cDNA 2510009E07 gene (2510009E07Rik)                                   | 0.45 |
| 2600005C20Rik | NM_028244      |                                                                              | 0.44 |
| 2610002D18Rik | XM_131720.2    |                                                                              | 0.65 |
| 2610017I09Rik | XR_035175.1    | PREDICTED: RIKEN cDNA 2610017I09 gene (2610017I09Rik), misc RNA.             | 0.46 |
| 2610019E17Rik |                |                                                                              | 0.44 |
| 2610024B07Rik |                |                                                                              | 0.45 |
| 2610024G14Rik | NM_019836.2    | RIKEN cDNA 2610024G14 gene (2610024G14Rik)                                   | 0.52 |
| 2610024H22Rik |                |                                                                              | 0.61 |
| 2610029G23Rik | NM_026312.2    | RIKEN cDNA 2610029G23 gene (2610029G23Rik)                                   | 0.57 |
| 2610036L11Rik | XM_488549.3    | PREDICTED: RIKEN cDNA 2610036L11 gene, transcript variant 1 (2610036L11Rik)  | 0.27 |
| 2610039C10Rik | NM_025642.1    | RIKEN cDNA 2610039C10 gene (2610039C10Rik)                                   | 0.34 |
| 2610101N10Rik | NM_026476.1    | RIKEN cDNA 2610101N10 gene (2610101N10Rik)                                   | 0.64 |
| 2610103J23Rik | NM_026002      |                                                                              | 0.62 |
| 2610207P08Rik | XM_127746.2    |                                                                              | 0.47 |
| 2610307O08Rik | XM_921606.2    | PREDICTED: RIKEN cDNA 2610307O08 gene, transcript variant 12 (2610307O08Rik) | 0.30 |
| 2610510J17Rik | NM_028131.1    | RIKEN cDNA 2610510J17 gene (2610510J17Rik)                                   | 0.38 |
| 2700029M09Rik | XM_001474993.1 | PREDICTED: RIKEN cDNA 2700029M09 gene (2700029M09Rik)                        | 0.50 |
| 2700055A20Rik | NM_027314      |                                                                              | 0.66 |
| 2700092H06Rik | XM_132529.2    |                                                                              | 0.65 |
| 2700094K13Rik | NM_001037279.1 | RIKEN cDNA 2700094K13 gene (2700094K13Rik), transcript variant 2             | 0.16 |
| 2810025M15Rik | XR_035184.1    | PREDICTED: RIKEN cDNA 2810025M15 gene (2810025M15Rik), misc RNA.             | 0.37 |
| 2810026P18Rik |                |                                                                              | 0.63 |
| 2810405J04Rik | NM_133747.2    | RIKEN cDNA 2810405J04 gene (2810405J04Rik)                                   | 0.49 |
| 2810417H13Rik | NM_026515.2    | RIKEN cDNA 2810417H13 gene (2810417H13Rik)                                   | 0.15 |
| 2810417K24Rik | AK013109       |                                                                              | 0.37 |
| 2810423A18Rik |                |                                                                              | 0.62 |
| 2810452K22Rik | NM_026048.2    | RIKEN cDNA 2810452K22 gene (2810452K22Rik)                                   | 0.62 |
| 2900010M23Rik | NM_026063.1    | RIKEN cDNA 2900010M23 gene (2900010M23Rik)                                   | 0.65 |
| 2900056M07Rik | AK013705       |                                                                              | 0.62 |
| 2900060B14Rik |                |                                                                              | 0.56 |
| 2900060P06Rik |                |                                                                              | 0.39 |
| 2900072M03Rik |                |                                                                              | 0.53 |
| 3000004C01Rik | NM_197959.1    | RIKEN cDNA 3000004C01 gene (3000004C01Rik)                                   | 0.40 |
| 3010015K02Rik |                |                                                                              | 0.67 |
| 3110009E18Rik | NM_028439.1    | RIKEN cDNA 3110009E18 gene (3110009E18Rik)                                   | 0.48 |
| 3110013H01Rik | XM_203393.1    |                                                                              | 0.48 |
| 3110035E14Rik | NM_178399.4    | RIKEN cDNA 3110035E14 gene (3110035E14Rik)                                   | 0.60 |
| 3110043A19Rik | XM_001476479.1 | PREDICTED: RIKEN cDNA 3110043A19 gene (3110043A19Rik)                        | 0.55 |
| 3300001G02Rik | NM_030093.1    | RIKEN cDNA 3300001G02 gene (3300001G02Rik)                                   | 0.63 |
| 3632451O06Rik | NM_026142.1    | RIKEN cDNA 3632451O06 gene (3632451O06Rik)                                   | 0.33 |
| 3830612M24    |                |                                                                              | 0.14 |
| 3930401E15Rik | AK076210       |                                                                              | 0.60 |
| 4631422C13Rik | XM_984472.1    | PREDICTED: RIKEN cDNA 4631422C13 gene (4631422C13Rik)                        | 0.64 |
| 4631427C17Rik | NM_021414.3    | RIKEN cDNA 4631427C17 gene (4631427C17Rik)                                   | 0.65 |
| 4632417K18Rik | NM_026640.2    | RIKEN cDNA 4632417K18 gene (4632417K18Rik)                                   | 0.27 |
| 4833424O15Rik | NM_029425.1    | RIKEN cDNA 4833424O15 gene (4833424O15Rik)                                   | 0.44 |
| 4833426J09Rik |                |                                                                              | 0.66 |
| 4833427B12Rik | XM_195728      |                                                                              | 0.58 |
| 4930427A07Rik | NM_134041.2    | RIKEN cDNA 4930427A07 gene (4930427A07Rik)                                   | 0.64 |
| 4930430F08Rik | NM_175128      |                                                                              | 0.67 |
| 4930487N19Rik | AK015640       |                                                                              | 0.65 |
| 4930547N16Rik | NM_029249.2    | RIKEN cDNA 4930547N16 gene (4930547N16Rik)                                   | 0.54 |
| 4930572J05Rik | NM_198607.1    | RIKEN cDNA 4930572J05 gene (4930572J05Rik)                                   | 0.46 |
| 4932417H02Rik | NM_028898.2    | RIKEN cDNA 4932417H02 gene (4932417H02Rik)                                   | 0.57 |
| 4933401P20Rik | AK016608       |                                                                              | 0.58 |
| 4933407C03Rik | XM_001004724.2 | PREDICTED: RIKEN cDNA 4933407C03 gene, transcript variant 6 (4933407C03Rik)  | 0.49 |
| 4933407N01Rik | NM_025745.2    |                                                                              | 0.66 |
| 4933407P14Rik | NM_199019.1    |                                                                              | 0.60 |
| 4933427G23Rik | XR_005167.1    | PREDICTED: RIKEN cDNA 4933427G23 gene (4933427G23Rik), misc RNA.             | 0.60 |
| 4933428A15Rik | NM_027756      |                                                                              | 0.60 |
| 5430417J04Rik | AK030671       |                                                                              | 0.61 |
| 5530401N12Rik |                |                                                                              | 0.39 |
| 5730410I19Rik | NM_025666.1    | RIKEN cDNA 5730410I19 gene (5730410I19Rik)                                   | 0.62 |
| 5730427N09Rik | NM_021552.4    | RIKEN cDNA 5730427N09 gene (5730427N09Rik)                                   | 0.44 |

|                      |                |                                                                                                           |      |
|----------------------|----------------|-----------------------------------------------------------------------------------------------------------|------|
| <i>5730494J16Rik</i> | AK077637       |                                                                                                           | 0.34 |
| <i>5830411I20</i>    |                |                                                                                                           | 0.36 |
| <i>5930416I19Rik</i> | NM_197981.1    | RIKEN cDNA 5930416I19 gene (5930416I19Rik)                                                                | 0.51 |
| <i>6030405A18</i>    | NM_177854      |                                                                                                           | 0.56 |
| <i>6030405A18Rik</i> | NM_177854.2    | RIKEN cDNA 6030405A18 gene (6030405A18Rik)                                                                | 0.47 |
| <i>6230416J20Rik</i> | NM_173400      |                                                                                                           | 0.64 |
| <i>6330509M05Rik</i> |                |                                                                                                           | 0.66 |
| <i>6330549D23Rik</i> | NR_003619.1    | RIKEN cDNA 6330549D23 gene (6330549D23Rik), non-coding RNA.                                               | 0.59 |
| <i>6330569M22Rik</i> | NM_153563.1    | RIKEN cDNA 6330569M22 gene (6330569M22Rik)                                                                | 0.62 |
| <i>6330578E17Rik</i> | NM_198006.3    | RIKEN cDNA 6330578E17 gene (6330578E17Rik)                                                                | 0.50 |
| <i>6332401O19Rik</i> | NM_177013.3    | RIKEN cDNA 6332401O19 gene (6332401O19Rik)                                                                | 0.60 |
| <i>6430402L23Rik</i> | AK078178       |                                                                                                           | 0.46 |
| <i>6430527G18Rik</i> | NM_145836.1    | RIKEN cDNA 6430527G18 gene (6430527G18Rik)                                                                | 0.44 |
| <i>6430537F04</i>    |                |                                                                                                           | 0.31 |
| <i>6430706D22Rik</i> | NM_198652.1    | RIKEN cDNA 6430706D22 gene (6430706D22Rik)                                                                | 0.40 |
| <i>6530401D06Rik</i> | AK018306       |                                                                                                           | 0.66 |
| <i>6530418L21Rik</i> | NM_175398.3    | RIKEN cDNA 6530418L21 gene (6530418L21Rik)                                                                | 0.40 |
| <i>6720458F09Rik</i> | NM_177374.2    | RIKEN cDNA 6720458F09 gene (6720458F09Rik)                                                                | 0.52 |
| <i>6720460F02Rik</i> | NM_144526.2    | RIKEN cDNA 6720460F02 gene (6720460F02Rik)                                                                | 0.66 |
| <i>6720463M24Rik</i> | NM_175265.4    | RIKEN cDNA 6720463M24 gene (6720463M24Rik)                                                                | 0.48 |
| <i>8030402P03Rik</i> | AK078743       |                                                                                                           | 0.62 |
| <i>9030024J15Rik</i> |                |                                                                                                           | 0.48 |
| <i>9330134C04Rik</i> | NM_001013608.1 | RIKEN cDNA 9330134C04 gene (9330134C04Rik)                                                                | 0.64 |
| <i>9430008C03Rik</i> | XM_001004952.1 | PREDICTED: RIKEN cDNA 9430008C03 gene (9430008C03Rik)                                                     | 0.65 |
| <i>9430065L19Rik</i> | AK034952       |                                                                                                           | 0.51 |
| <i>9430080K19Rik</i> |                |                                                                                                           | 0.46 |
| <i>9530018I07Rik</i> |                |                                                                                                           | 0.49 |
| <i>9530058B02Rik</i> | NM_026633.1    | RIKEN cDNA 9530058B02 gene (9530058B02Rik)                                                                | 0.64 |
| <i>9530064J02</i>    | XM_489200      |                                                                                                           | 0.13 |
| <i>9830001H06Rik</i> | XM_283804.7    | PREDICTED: RIKEN cDNA 9830001H06 gene (9830001H06Rik)                                                     | 0.66 |
| <i>9930014A18Rik</i> | NM_177166.2    |                                                                                                           | 0.60 |
| <i>A230046K03Rik</i> | NM_001033375.2 | RIKEN cDNA A230046K03 gene (A230046K03Rik)                                                                | 0.61 |
| <i>A230079E18Rik</i> | AK038962       |                                                                                                           | 0.47 |
| <i>A830059I20Rik</i> | NM_021427.1    |                                                                                                           | 0.32 |
| <i>A930030J18Rik</i> | AK044660       |                                                                                                           | 0.53 |
| <i>AA960436</i>      | NM_133954.1    | expressed sequence AA960436 (AA960436)                                                                    | 0.60 |
| <i>Aadacl1</i>       | NM_178772.2    | arylacetamide deacetylase-like 1 (Aadacl1)                                                                | 0.63 |
| <i>Aard</i>          | NM_175503.3    | alanine and arginine rich domain containing protein (Aard)                                                | 0.32 |
| <i>Aars</i>          | NM_146217.3    | alanyl-tRNA synthetase (Aars)                                                                             | 0.48 |
| <i>Aatk</i>          | NM_007377.3    | apoptosis-associated tyrosine kinase (Aatk)                                                               | 0.20 |
| <i>Abcb7</i>         | XM_907304.2    | PREDICTED: ATP-binding cassette, sub-family B (MDR/TAP), member 7, transcript variant 5 (Abcb7)           | 0.47 |
| <i>Abcf1</i>         | NM_013854.1    | ATP-binding cassette, sub-family F (GCN20), member 1 (Abcf1)                                              | 0.66 |
| <i>Abcf2</i>         | NM_013853.1    | ATP-binding cassette, sub-family F (GCN20), member 2 (Abcf2), nuclear gene encoding mitochondrial protein | 0.63 |
| <i>Abi2</i>          | NM_198127.1    | abl-interactor 2 (Abi2)                                                                                   | 0.46 |
| <i>Acadl</i>         | NM_007381.3    | acyl-Coenzyme A dehydrogenase, long-chain (Acadl), nuclear gene encoding mitochondrial protein            | 0.47 |
| <i>Acads</i>         | NM_007383.2    | acyl-Coenzyme A dehydrogenase, short chain (Acads), nuclear gene encoding mitochondrial protein           | 0.59 |
| <i>Acap3</i>         | NM_207223.1    | ArfGAP with coiled-coil, ankyrin repeat and PH domains 3 (Acap3)                                          | 0.39 |
| <i>Acat2</i>         | NM_009338.3    | acetyl-Coenzyme A acetyltransferase 2 (Acat2)                                                             | 0.39 |
| <i>Acbd3</i>         | NM_133225.2    | acyl-Coenzyme A binding domain containing 3 (Acbd3)                                                       | 0.65 |
| <i>Acly</i>          | NM_134037.2    | ATP citrate lyase (Acly)                                                                                  | 0.46 |
| <i>Acn9</i>          | XM_355744.1    |                                                                                                           | 0.64 |
| <i>Aco2</i>          | NM_080633.2    | aconitase 2, mitochondrial (Aco2), nuclear gene encoding mitochondrial protein                            | 0.51 |
| <i>Acot7</i>         | NM_133348.1    | acyl-CoA thioesterase 7 (Acot7)                                                                           | 0.51 |
| <i>Acpl2</i>         | NM_153420.2    | acid phosphatase-like 2 (Acpl2)                                                                           | 0.54 |
| <i>Acsbg1</i>        | NM_053178.2    | acyl-CoA synthetase bubblegum family member 1 (Acsbg1)                                                    | 0.36 |
| <i>Acsl5</i>         | NM_027976.2    | acyl-CoA synthetase long-chain family member 5 (Acsl5)                                                    | 0.43 |
| <i>Acss2</i>         | NM_019811.3    | acyl-CoA synthetase short-chain family member 2 (Acss2)                                                   | 0.51 |
| <i>Actb</i>          | NM_007393.1    | actin, beta, cytoplasmic (Actb)                                                                           | 0.44 |
| <i>Actl6a</i>        | NM_019673.1    | actin-like 6A (Actl6a)                                                                                    | 0.53 |
| <i>Actr3</i>         | NM_023735.1    | ARP3 actin-related protein 3 homolog (yeast) (Actr3)                                                      | 0.56 |
| <i>Acy1</i>          | NM_025371.1    | aminoacylase 1 (Acy1)                                                                                     | 0.67 |
| <i>Adam12</i>        | NM_007400.2    | a disintegrin and metallopeptidase domain 12 (meltrin alpha) (Adam12)                                     | 0.19 |
| <i>Adam15</i>        | NM_009614.2    | a disintegrin and metallopeptidase domain 15 (metargidin) (Adam15), transcript variant 2                  | 0.60 |
| <i>Adam17</i>        | NM_009615.5    | a disintegrin and metallopeptidase domain 17 (Adam17)                                                     | 0.53 |

|                 |                |                                                                                                                           |      |
|-----------------|----------------|---------------------------------------------------------------------------------------------------------------------------|------|
| <i>Adamts19</i> | NM_175506.3    | a disintegrin-like and metallopeptidase (reprolysin type) with thrombospondin type 1 motif, 19 (Adamts19)                 | 0.38 |
| <i>Adamts4</i>  | NM_172845.1    |                                                                                                                           | 0.35 |
| <i>Adm</i>      | NM_009627.1    | adrenomedullin (Adm)                                                                                                      | 0.51 |
| <i>Adnp</i>     | NM_009628.2    | activity-dependent neuroprotective protein (Adnp)                                                                         | 0.62 |
| <i>Adpgk</i>    | NM_028121.1    |                                                                                                                           | 0.57 |
| <i>Adrb2</i>    | NM_007420.2    | adrenergic receptor, beta 2 (Adrb2)                                                                                       | 0.54 |
| <i>Adsl</i>     | NM_009634      |                                                                                                                           | 0.62 |
| <i>Aes</i>      | NM_010347.2    | amino-terminal enhancer of split (Aes)                                                                                    | 0.41 |
| <i>Afg31</i>    | NM_054070.2    | AFG3(ATPase family gene 3)-like 1 (yeast) (Afg31)                                                                         | 0.63 |
| <i>Agap1</i>    | NM_001037136.1 | ArfGAP with GTPase domain, ankyrin repeat and PH domain 1 (Agap1), transcript variant 2                                   | 0.60 |
| <i>Agfg2</i>    | NM_178162.2    | ArfGAP with FG repeats 2 (Agfg2), transcript variant 2                                                                    | 0.66 |
| <i>Ahctf1</i>   | NM_026375.1    | AT hook containing transcription factor 1 (Ahctf1)                                                                        | 0.56 |
| <i>Ahcy</i>     | NM_016661      |                                                                                                                           | 0.52 |
| <i>Ahcyl1</i>   | NM_145542.3    | S-adenosylhomocysteine hydrolase-like 1 (Ahcyl1)                                                                          | 0.60 |
| <i>AI413582</i> | NM_001002895.2 | expressed sequence AI413582 (AI413582)                                                                                    | 0.60 |
| <i>AI448196</i> | XM_136041.3    |                                                                                                                           | 0.48 |
| <i>AI464131</i> | NM_001085515.1 | expressed sequence AI464131 (AI464131)                                                                                    | 0.62 |
| <i>AI481316</i> | XM_148986.1    |                                                                                                                           | 0.39 |
| <i>AI593442</i> | NM_177907.2    | expressed sequence AI593442 (AI593442), transcript variant 1                                                              | 0.50 |
| <i>AI851790</i> | NM_182807.2    | expressed sequence AI851790 (AI851790)                                                                                    | 0.50 |
| <i>Ak2</i>      | NM_001033966.3 | adenylate kinase 2 (Ak2), transcript variant 1                                                                            | 0.57 |
| <i>Akap12</i>   | NM_031185.2    | A kinase (PRKA) anchor protein (gravin) 12 (Akap12)                                                                       | 0.09 |
| <i>Akap7</i>    | NM_018747.3    | A kinase (PRKA) anchor protein 7 (Akap7)                                                                                  | 0.42 |
| <i>Akirin1</i>  | NM_023423.3    | akirin 1 (Akirin1)                                                                                                        | 0.65 |
| <i>Alad</i>     | NM_008525.3    | aminolevulinic acid, delta-, dehydratase (Alad)                                                                           | 0.58 |
| <i>Aldh18a1</i> | NM_019698.1    | aldehyde dehydrogenase 18 family, member A1 (Aldh18a1), nuclear gene encoding mitochondrial protein, transcript variant 1 | 0.42 |
| <i>Aldh1a3</i>  | AK043530       |                                                                                                                           | 0.57 |
| <i>Alg6</i>     | NM_001081264.1 | asparagine-linked glycosylation 6 homolog (yeast, alpha-1,3,-glucosyltransferase) (Alg6)                                  | 0.66 |
| <i>Alg8</i>     | NM_199035.1    | asparagine-linked glycosylation 8 homolog (yeast, alpha-1,3,-glucosyltransferase) (Alg8)                                  | 0.53 |
| <i>Alg9</i>     | NM_133981.1    | asparagine-linked glycosylation 9 homolog (yeast, alpha 1,2 mannosyltransferase) (Alg9)                                   | 0.62 |
| <i>Alkbh3</i>   | NM_026944.1    | alkB, alkylation repair homolog 3 (E. coli) (Alkbh3)                                                                      | 0.63 |
| <i>Als2</i>     | NM_028717.2    | amyotrophic lateral sclerosis 2 (juvenile) homolog (human) (Als2)                                                         | 0.66 |
| <i>Amot1</i>    | NM_001081395.1 | angiomin-like 1 (Amot1)                                                                                                   | 0.41 |
| <i>Amph</i>     | NM_175007.1    | amphiphysin (Amph)                                                                                                        | 0.54 |
| <i>Anapc5</i>   | NM_021505.2    | anaphase-promoting complex subunit 5 (Anapc5), transcript variant 1                                                       | 0.61 |
| <i>Angpt2</i>   | NM_007426.3    | angiopoietin 2 (Angpt2)                                                                                                   | 0.04 |
| <i>Ank3</i>     | NM_170687.3    | ankyrin 3, epithelial (Ank3), transcript variant 6                                                                        | 0.22 |
| <i>Ankrd49</i>  | NM_019683.3    | ankyrin repeat domain 49 (Ankrd49)                                                                                        | 0.59 |
| <i>Anln</i>     | NM_028390.2    | anillin, actin binding protein (Anln)                                                                                     | 0.22 |
| <i>Anp32e</i>   | NM_023210.3    | acidic (leucine-rich) nuclear phosphoprotein 32 family, member E (Anp32e)                                                 | 0.34 |
| <i>Ap2b1</i>    | NM_001035854.2 | adaptor-related protein complex 2, beta 1 subunit (Ap2b1), transcript variant 1                                           | 0.52 |
| <i>Apex1</i>    | NM_009687.1    | apurinic/apyrimidinic endonuclease 1 (Apex1)                                                                              | 0.65 |
| <i>Apitd1</i>   | NM_027263.1    | apoptosis-inducing, TAF9-like domain 1 (Apitd1)                                                                           | 0.66 |
| <i>Appbp2</i>   | NM_025825      |                                                                                                                           | 0.54 |
| <i>Appl1</i>    | NM_145221.2    | adaptor protein, phosphotyrosine interaction, PH domain and leucine zipper containing 1 (Appl1)                           | 0.65 |
| <i>Aprin</i>    | NM_175310.5    | androgen-induced proliferation inhibitor (Aprin)                                                                          | 0.46 |
| <i>Arc</i>      | NM_018790.2    | activity regulated cytoskeletal-associated protein (Arc)                                                                  | 0.56 |
| <i>Ard1</i>     | NM_019870.1    |                                                                                                                           | 0.59 |
| <i>Ard1a</i>    | NM_019870.2    | ARD1 homolog A, N-acetyltransferase (S. cerevisiae) (Ard1a)                                                               | 0.43 |
| <i>Areg</i>     | NM_009704.3    | amphiregulin (Areg)                                                                                                       | 0.24 |
| <i>Arf6</i>     | NM_007481.3    | ADP-ribosylation factor 6 (Arf6)                                                                                          | 0.56 |
| <i>Arhgap18</i> | NM_176837.2    | Rho GTPase activating protein 18 (Arhgap18)                                                                               | 0.23 |
| <i>Arhgap20</i> | NM_175535.3    | Rho GTPase activating protein 20 (Arhgap20)                                                                               | 0.64 |
| <i>Arih1</i>    | NM_019927.1    | ariadne ubiquitin-conjugating enzyme E2 binding protein homolog 1 (Drosophila) (Arih1)                                    | 0.64 |
| <i>Arl4c</i>    | NM_177305.3    | ADP-ribosylation factor-like 4C (Arl4c)                                                                                   | 0.63 |
| <i>Armxc2</i>   | NM_026139.3    | armadillo repeat containing, X-linked 2 (Armxc2)                                                                          | 0.63 |
| <i>Arpc1b</i>   | NM_023142.1    | actin related protein 2/3 complex, subunit 1B (Arpc1b)                                                                    | 0.33 |
| <i>Arpc3</i>    | NM_019824.3    | actin related protein 2/3 complex, subunit 3 (Arpc3)                                                                      | 0.45 |
| <i>Arpp21</i>   | NM_028755.2    | cyclic AMP-regulated phosphoprotein, 21 (Arpp21), transcript variant 1                                                    | 0.46 |
| <i>Asah1</i>    | NM_019734.1    | N-acylsphingosine amidohydrolase 1 (Asah1)                                                                                | 0.37 |
| <i>Asb1</i>     | NM_023046.4    | ankyrin repeat and SOCS box-containing 1 (Asb1), transcript variant 2                                                     | 0.65 |

|                      |                |                                                                                                                                                                      |      |
|----------------------|----------------|----------------------------------------------------------------------------------------------------------------------------------------------------------------------|------|
| <i>Ascc3</i>         | XM_125617.7    | PREDICTED: activating signal cointegrator 1 complex subunit 3, transcript variant 1 ( <i>Ascc3</i> )                                                                 | 0.66 |
| <i>Asns</i>          | NM_012055.1    | asparagine synthetase ( <i>Asns</i> )                                                                                                                                | 0.51 |
| <i>Aspm</i>          | NM_009791.4    | asp (abnormal spindle)-like, microcephaly associated ( <i>Drosophila</i> ) ( <i>Aspm</i> )                                                                           | 0.35 |
| <i>Atad1</i>         | NM_026487.3    | ATPase family, AAA domain containing 1 ( <i>Atad1</i> )                                                                                                              | 0.64 |
| <i>Atad3a</i>        | NM_179203.1    | ATPase family, AAA domain containing 3A ( <i>Atad3a</i> )                                                                                                            | 0.59 |
| <i>Atf4</i>          | NM_009716.2    | activating transcription factor 4 ( <i>Atf4</i> )                                                                                                                    | 0.55 |
| <i>Atf7ip</i>        | NM_019426.2    | activating transcription factor 7 interacting protein ( <i>Atf7ip</i> )                                                                                              | 0.52 |
| <i>Atic</i>          | NM_026195.1    | 5-aminoimidazole-4-carboxamide ribonucleotide formyltransferase/IMP cyclohydrolase ( <i>Atic</i> )                                                                   | 0.58 |
| <i>Atp13a3</i>       | XM_001480958.1 | PREDICTED: ATPase type 13A3, transcript variant 1 ( <i>Atp13a3</i> )                                                                                                 | 0.59 |
| <i>Atp1b3</i>        | NM_007502.3    | ATPase, Na <sup>+</sup> /K <sup>+</sup> transporting, beta 3 polypeptide ( <i>Atp1b3</i> )                                                                           | 0.57 |
| <i>Atp5a1</i>        | NM_007505.2    | ATP synthase, H <sup>+</sup> transporting, mitochondrial F1 complex, alpha subunit, isoform 1 ( <i>Atp5a1</i> ), nuclear gene encoding mitochondrial protein         | 0.57 |
| <i>Atp5c1</i>        | NM_020615.3    | ATP synthase, H <sup>+</sup> transporting, mitochondrial F1 complex, gamma polypeptide 1 ( <i>Atp5c1</i> )                                                           | 0.63 |
| <i>Atp5d</i>         | NM_025313.1    | ATP synthase, H <sup>+</sup> transporting, mitochondrial F1 complex, delta subunit ( <i>Atp5d</i> )                                                                  | 0.57 |
| <i>Atp5f1</i>        | NM_009725.3    | ATP synthase, H <sup>+</sup> transporting, mitochondrial F0 complex, subunit b, isoform 1 ( <i>Atp5f1</i> ), nuclear gene encoding mitochondrial protein             | 0.56 |
| <i>Atp5g2</i>        | NM_026468.1    | ATP synthase, H <sup>+</sup> transporting, mitochondrial F0 complex, subunit c (subunit 9), isoform 2 ( <i>Atp5g2</i> )                                              | 0.63 |
| <i>Atp5g3</i>        | NM_175015.2    | ATP synthase, H <sup>+</sup> transporting, mitochondrial F0 complex, subunit c (subunit 9), isoform 3 ( <i>Atp5g3</i> ), nuclear gene encoding mitochondrial protein | 0.66 |
| <i>Atp5j</i>         | NM_016755.2    | ATP synthase, H <sup>+</sup> transporting, mitochondrial F0 complex, subunit F ( <i>Atp5j</i> ), nuclear gene encoding mitochondrial protein                         | 0.64 |
| <i>Atp5l</i>         | NM_013795.4    | ATP synthase, H <sup>+</sup> transporting, mitochondrial F0 complex, subunit g ( <i>Atp5l</i> ), nuclear gene encoding mitochondrial protein                         | 0.57 |
| <i>Atp5o</i>         | NM_138597.2    | ATP synthase, H <sup>+</sup> transporting, mitochondrial F1 complex, O subunit ( <i>Atp5o</i> ), nuclear gene encoding mitochondrial protein                         | 0.61 |
| <i>Atp6v0a1</i>      | NM_016920.1    |                                                                                                                                                                      | 0.66 |
| <i>AU022870</i>      | NM_177682.3    | expressed sequence AU022870 (AU022870)                                                                                                                               | 0.63 |
| <i>AU040320</i>      | NM_133886.2    | expressed sequence AU040320 (AU040320), transcript variant 3                                                                                                         | 0.50 |
| <i>Aurka</i>         | NM_011497.3    | aurora kinase A ( <i>Aurka</i> )                                                                                                                                     | 0.18 |
| <i>Aurkaip1</i>      | NM_025338.3    | aurora kinase A interacting protein 1 ( <i>Aurkaip1</i> )                                                                                                            | 0.63 |
| <i>Aurkb</i>         | NM_011496.1    | aurora kinase B ( <i>Aurkb</i> )                                                                                                                                     | 0.25 |
| <i>AW120700</i>      |                |                                                                                                                                                                      | 0.38 |
| <i>B230114H05Rik</i> | AK045406       |                                                                                                                                                                      | 0.53 |
| <i>B230208H17Rik</i> | NM_001024616.1 | RIKEN cDNA B230208H17 gene (B230208H17Rik)                                                                                                                           | 0.62 |
| <i>B230343A10Rik</i> |                |                                                                                                                                                                      | 0.46 |
| <i>B3galt6</i>       | NM_080445.4    | UDP-Gal:betaGal beta 1,3-galactosyltransferase, polypeptide 6 ( <i>B3galt6</i> )                                                                                     | 0.49 |
| <i>B3gnt5</i>        | NM_054052.2    | UDP-GlcNAc:betaGal beta-1,3-N-acetylglucosaminyltransferase 5 ( <i>B3gnt5</i> )                                                                                      | 0.58 |
| <i>B4galt3</i>       | NM_020579.1    | UDP-Gal:betaGlcNAc beta 1,4-galactosyltransferase, polypeptide 3 ( <i>B4galt3</i> )                                                                                  | 0.54 |
| <i>Bahcc1</i>        | NM_198423.2    | BAH domain and coiled-coil containing 1 ( <i>Bahcc1</i> )                                                                                                            | 0.42 |
| <i>Bai2</i>          | NM_173071.1    | brain-specific angiogenesis inhibitor 2 ( <i>Bai2</i> )                                                                                                              | 0.49 |
| <i>Banf1</i>         | NM_001038231.1 | barrier to autointegration factor 1 ( <i>Banf1</i> ), transcript variant 2                                                                                           | 0.28 |
| <i>BC002199</i>      | NM_145964.2    | cDNA sequence BC002199 (BC002199)                                                                                                                                    | 0.60 |
| <i>BC003236</i>      | NM_030249      |                                                                                                                                                                      | 0.47 |
| <i>BC003885</i>      | NM_198609.2    | cDNA sequence BC003885 (BC003885)                                                                                                                                    | 0.60 |
| <i>BC003965</i>      | XM_128528.2    |                                                                                                                                                                      | 0.55 |
| <i>BC017647</i>      | NM_145430.1    | cDNA sequence BC017647 (BC017647)                                                                                                                                    | 0.47 |
| <i>BC024659</i>      | XM_001472442.1 | PREDICTED: cDNA sequence BC024659 (BC024659)                                                                                                                         | 0.58 |
| <i>BC025076</i>      | NM_175002.1    |                                                                                                                                                                      | 0.55 |
| <i>BC026590</i>      | NM_001081420.1 | cDNA sequence BC026590 (BC026590)                                                                                                                                    | 0.67 |
| <i>BC031781</i>      | NM_145943.1    | cDNA sequence BC031781 (BC031781)                                                                                                                                    | 0.66 |
| <i>BC046331</i>      | NM_177673.2    | cDNA sequence BC046331 (BC046331)                                                                                                                                    | 0.61 |
| <i>BC046404</i>      | NM_198861.1    | cDNA sequence BC046404 (BC046404)                                                                                                                                    | 0.57 |
| <i>BC060632</i>      | NM_198625.1    | cDNA sequence BC060632 (BC060632)                                                                                                                                    | 0.59 |
| <i>BC067047</i>      | NM_177782.3    | cDNA sequence BC067047 (BC067047)                                                                                                                                    | 0.42 |
| <i>BC085271</i>      | NM_001008551.1 | cDNA sequence BC085271 (BC085271)                                                                                                                                    | 0.44 |
| <i>Bcan</i>          | NM_007529.1    | brevican ( <i>Bcan</i> )                                                                                                                                             | 0.42 |
| <i>Bcas1</i>         | NM_029815.1    | breast carcinoma amplified sequence 1 ( <i>Bcas1</i> )                                                                                                               | 0.32 |
| <i>Bccip</i>         | NM_025392.1    | BRCA2 and CDKN1A interacting protein ( <i>Bccip</i> )                                                                                                                | 0.63 |
| <i>Bcl7c</i>         | NM_009746.2    | B-cell CLL/lymphoma 7C ( <i>Bcl7c</i> )                                                                                                                              | 0.57 |
| <i>Bdnf</i>          | NM_001048141.1 | brain derived neurotrophic factor ( <i>Bdnf</i> ), transcript variant 3                                                                                              | 0.55 |
| <i>Bex2</i>          | XM_977338.1    | PREDICTED: brain expressed X-linked 2 ( <i>Bex2</i> )                                                                                                                | 0.22 |
| <i>Bhlhb9</i>        | NM_198161.1    | basic helix-loop-helix domain containing, class B9 ( <i>Bhlhb9</i> )                                                                                                 | 0.61 |
| <i>Bicd2</i>         | NM_029791      |                                                                                                                                                                      | 0.57 |
| <i>Bin1</i>          | NM_009668.1    | bridging integrator 1 ( <i>Bin1</i> )                                                                                                                                | 0.60 |
| <i>Birc5</i>         | NM_009689.2    | baculoviral IAP repeat-containing 5 ( <i>Birc5</i> ), transcript variant 1                                                                                           | 0.30 |

|                      |                |                                                                                                        |      |
|----------------------|----------------|--------------------------------------------------------------------------------------------------------|------|
| <i>Blm</i>           | NM_007550.3    | Bloom syndrome homolog (human) (Blm), transcript variant 1                                             | 0.39 |
| <i>Bloc1s2</i>       | XM_193940.2    |                                                                                                        | 0.63 |
| <i>Bmp7</i>          | NM_007557.2    | bone morphogenetic protein 7 (Bmp7)                                                                    | 0.64 |
| <i>Bmper</i>         | NM_028472.1    | BMP-binding endothelial regulator (Bmper)                                                              | 0.51 |
| <i>Bnip2</i>         | NM_001008238.2 | BCL2/adenovirus E1B interacting protein 2 (Bnip2), transcript variant alpha                            | 0.47 |
| <i>Bok</i>           | NM_016778      |                                                                                                        | 0.35 |
| <i>Bola2</i>         | NM_175103.2    | bolA-like 2 (E. coli) (Bola2)                                                                          | 0.59 |
| <i>Bola3</i>         | NM_175277.2    | bolA-like 3 (E. coli) (Bola3)                                                                          | 0.65 |
| <i>Bop1</i>          | NM_013481.1    | block of proliferation 1 (Bop1)                                                                        | 0.66 |
| <i>Bpnt1</i>         | NM_011794.3    | bisphosphate 3'-nucleotidase 1 (Bpnt1)                                                                 | 0.56 |
| <i>Brd2</i>          | NM_001025387.2 | bromodomain containing 2 (Brd2), transcript variant 2                                                  | 0.61 |
| <i>Brd3</i>          | NM_023336      |                                                                                                        | 0.65 |
| <i>Brip1</i>         | NM_178309.1    | BRCA1 interacting protein C-terminal helicase 1 (Brip1)                                                | 0.62 |
| <i>Brp17</i>         | NM_019999.1    |                                                                                                        | 0.53 |
| <i>Brn1</i>          | NM_144818      |                                                                                                        | 0.20 |
| <i>Btaf1</i>         | NM_001080706.1 | BTA1 RNA polymerase II, B-TFIID transcription factor-associated, (Mot1 homolog, S. cerevisiae) (Btaf1) | 0.66 |
| <i>Btbd11</i>        | NM_001017525.1 | BTB (POZ) domain containing 11 (Btbd11), transcript variant 2                                          | 0.38 |
| <i>Btbd12</i>        | NM_177472.4    | BTB (POZ) domain containing 12 (Btbd12)                                                                | 0.67 |
| <i>Btf3</i>          | NM_145455.1    |                                                                                                        | 0.56 |
| <i>Btg1</i>          | NM_007569.1    | B-cell translocation gene 1, anti-proliferative (Btg1)                                                 | 0.54 |
| <i>Bub1b</i>         | NM_009773      |                                                                                                        | 0.17 |
| <i>Bves</i>          | NM_024285      |                                                                                                        | 0.43 |
| <i>Bxdc1</i>         | NM_023323      |                                                                                                        | 0.56 |
| <i>Bxdc2</i>         | NM_026396.2    | brix domain containing 2 (Bxdc2)                                                                       | 0.53 |
| <i>Bxdc5</i>         | NM_027371.2    | brix domain containing 5 (Bxdc5), transcript variant 2                                                 | 0.57 |
| <i>Bzw1</i>          | NM_025824      |                                                                                                        | 0.42 |
| <i>Bzw2</i>          | NM_025840.2    | basic leucine zipper and W2 domains 2 (Bzw2)                                                           | 0.38 |
| <i>C030003D03Rik</i> | NM_029881.2    | RIKEN cDNA C030003D03 gene (C030003D03Rik)                                                             | 0.38 |
| <i>C130007D14</i>    | NM_177914.1    |                                                                                                        | 0.59 |
| <i>C130020C13Rik</i> |                |                                                                                                        | 0.63 |
| <i>C130032J12Rik</i> | NM_178684.3    | RIKEN cDNA C130032J12 gene (C130032J12Rik)                                                             | 0.56 |
| <i>C1galt1c1</i>     | NM_021550.2    | C1GALT1-specific chaperone 1 (C1galt1c1)                                                               | 0.61 |
| <i>C230043G09Rik</i> | AK048752       |                                                                                                        | 0.60 |
| <i>C230053B09Rik</i> | AK048765       |                                                                                                        | 0.60 |
| <i>C230071H18Rik</i> | NM_207265.2    | RIKEN cDNA C230071H18 gene (C230071H18Rik)                                                             | 0.60 |
| <i>C230078M08Rik</i> | NM_176995.2    | RIKEN cDNA C230078M08 gene (C230078M08Rik)                                                             | 0.62 |
| <i>C330006P03Rik</i> |                |                                                                                                        | 0.41 |
| <i>C330023M02Rik</i> | NM_172722      |                                                                                                        | 0.58 |
| <i>C530008M17Rik</i> | XM_916109.2    | PREDICTED: RIKEN cDNA C530008M17 gene, transcript variant 3 (C530008M17Rik)                            | 0.25 |
| <i>C730026E21Rik</i> | NM_175439      |                                                                                                        | 0.66 |
| <i>C730029F17Rik</i> | AK050233       |                                                                                                        | 0.59 |
| <i>C78339</i>        | XM_127312      |                                                                                                        | 0.53 |
| <i>C79267</i>        | NM_183148      |                                                                                                        | 0.56 |
| <i>C79407</i>        | NM_172578.2    | expressed sequence C79407 (C79407)                                                                     | 0.46 |
| <i>C80913</i>        | NM_011274.4    | expressed sequence C80913 (C80913)                                                                     | 0.62 |
| <i>C920004C08Rik</i> |                |                                                                                                        | 0.21 |
| <i>Cacna1h</i>       | NM_021415.3    | calcium channel, voltage-dependent, T type, alpha 1H subunit (Cacna1h)                                 | 0.39 |
| <i>Cacna2d1</i>      | NM_009784.1    | calcium channel, voltage-dependent, alpha2/delta subunit 1 (Cacna2d1)                                  | 0.66 |
| <i>Cacng5</i>        | NM_080644.3    | calcium channel, voltage-dependent, gamma subunit 5 (Cacng5)                                           | 0.57 |
| <i>Calm2</i>         | NM_007589.4    | calmodulin 2 (Calm2)                                                                                   | 0.29 |
| <i>Calr</i>          | NM_007591.3    | calreticulin (Calr)                                                                                    | 0.53 |
| <i>Calu</i>          | NM_007594.3    | calumenin (Calu), transcript variant 1                                                                 | 0.34 |
| <i>Camk1</i>         | NM_133926.2    | calcium/calmodulin-dependent protein kinase I (Camk1)                                                  | 0.64 |
| <i>Camk2b</i>        | NM_007595.3    | calcium/calmodulin-dependent protein kinase II, beta (Camk2b)                                          | 0.16 |
| <i>Camk2n2</i>       | XM_990809.1    | PREDICTED: calcium/calmodulin-dependent protein kinase II inhibitor 2 (Camk2n2)                        | 0.55 |
| <i>Camkk2</i>        | NM_145358.1    | calcium/calmodulin-dependent protein kinase kinase 2, beta (Camkk2)                                    | 0.52 |
| <i>Camta1</i>        | NM_001081557.1 | calmodulin binding transcription activator 1 (Camta1), transcript variant 1                            | 0.61 |
| <i>Cand1</i>         | XM_125901.8    | PREDICTED: cullin associated and neddylation disassociated 1, transcript variant 1 (Cand1)             | 0.65 |
| <i>Caprin1</i>       | NM_016739.2    | cell cycle associated protein 1 (Caprin1)                                                              | 0.64 |
| <i>Car2</i>          | NM_009801.3    | carbonic anhydrase 2 (Car2)                                                                            | 0.39 |
| <i>Cask</i>          | NM_009806.2    | calcium/calmodulin-dependent serine protein kinase (MAGUK family) (Cask)                               | 0.35 |
| <i>Cbfb</i>          | NM_022309.2    | core binding factor beta (Cbfb)                                                                        | 0.21 |
| <i>Cbr3</i>          | NM_173047.2    | carbonyl reductase 3 (Cbr3)                                                                            | 0.61 |
| <i>Cbx3</i>          | NM_007624      |                                                                                                        | 0.45 |
| <i>Cbx5</i>          | NM_001076789.1 | chromobox homolog 5 (Drosophila HP1a) (Cbx5), transcript variant 2                                     | 0.59 |
| <i>Ccdc124</i>       | NM_026964.3    | coiled-coil domain containing 124 (Ccdc124)                                                            | 0.64 |
| <i>Ccdc28b</i>       | NM_025455.2    | coiled coil domain containing 28B (Ccdc28b)                                                            | 0.62 |

|                   |                |                                                                              |      |
|-------------------|----------------|------------------------------------------------------------------------------|------|
| <i>Ccdc41</i>     | NM_029852.2    | coiled-coil domain containing 41 (Ccdc41)                                    | 0.65 |
| <i>Ccdc58</i>     | NM_198645.1    | coiled-coil domain containing 58 (Ccdc58)                                    | 0.64 |
| <i>Ccdc59</i>     | NM_025602.3    | coiled-coil domain containing 59 (Ccdc59)                                    | 0.64 |
| <i>Ccdc85b</i>    | NM_198616.2    | coiled-coil domain containing 85B (Ccdc85b)                                  | 0.59 |
| <i>Ccdc86</i>     | NM_023731.2    | coiled-coil domain containing 86 (Ccdc86)                                    | 0.61 |
| <i>Ccdc99</i>     | NM_027411.1    | coiled-coil domain containing 99 (Ccdc99)                                    | 0.57 |
| <i>Ccnb1</i>      | NM_172301.3    | cyclin B1 (Ccnb1)                                                            | 0.12 |
| <i>Ccnd1</i>      | NM_007631.1    |                                                                              | 0.04 |
| <i>Ccnd2</i>      | AK077367       |                                                                              | 0.43 |
| <i>Ccne2</i>      | NM_001037134.1 | cyclin E2 (Ccne2), transcript variant 1                                      | 0.65 |
| <i>Ccnyl1</i>     | NM_001097644.1 | cyclin Y-like 1 (Ccnyl1)                                                     | 0.38 |
| <i>Cct3</i>       | NM_009836.1    | chaperonin containing Tcp1, subunit 3 (gamma) (Cct3)                         | 0.51 |
| <i>Cct4</i>       | NM_009837.1    | chaperonin containing Tcp1, subunit 4 (delta) (Cct4)                         | 0.56 |
| <i>Cct6a</i>      | NM_009838.1    | chaperonin containing Tcp1, subunit 6a (zeta) (Cct6a)                        | 0.48 |
| <i>Cct8</i>       | NM_009840.3    | chaperonin containing Tcp1, subunit 8 (theta) (Cct8)                         | 0.52 |
| <i>Cd1d1</i>      | NM_007639.2    | CD1d1 antigen (Cd1d1)                                                        | 0.49 |
| <i>Cd276</i>      | NM_133983.3    | CD276 antigen (Cd276)                                                        | 0.27 |
| <i>Cdc20</i>      | NM_023223.1    | cell division cycle 20 homolog (S. cerevisiae) (Cdc20)                       | 0.19 |
| <i>Cdc25a</i>     | NM_007658.3    | cell division cycle 25 homolog A (S. pombe) (Cdc25a)                         | 0.58 |
| <i>Cdc25c</i>     | NM_009860.2    | cell division cycle 25 homolog C (S. pombe) (Cdc25c)                         | 0.61 |
| <i>Cdc2a</i>      | NM_007659.3    | cell division cycle 2 homolog A (S. pombe) (Cdc2a)                           | 0.15 |
| <i>Cdc21l</i>     | NM_007661.3    | cell division cycle 2-like 1 (Cdc21l)                                        | 0.65 |
| <i>Cdc42se1</i>   | NM_172395.2    | CDC42 small effector 1 (Cdc42se1), transcript variant 1                      | 0.48 |
| <i>Cdc45l</i>     | NM_009862.1    | cell division cycle 45 homolog (S. cerevisiae)-like (Cdc45l)                 | 0.47 |
| <i>Cdc5l</i>      | NM_152810.1    | cell division cycle 5-like (S. pombe) (Cdc5l)                                | 0.58 |
| <i>Cdc6</i>       | NM_011799.2    | cell division cycle 6 homolog (S. cerevisiae) (Cdc6), transcript variant 1   | 0.55 |
| <i>Cdc7</i>       | NM_009863.2    | cell division cycle 7 (S. cerevisiae) (Cdc7)                                 | 0.30 |
| <i>Cdca2</i>      | NM_175384.3    | cell division cycle associated 2 (Cdca2)                                     | 0.25 |
| <i>Cdca3</i>      | NM_013538.4    | cell division cycle associated 3 (Cdca3)                                     | 0.12 |
| <i>Cdca4</i>      | NM_028023.3    | cell division cycle associated 4 (Cdca4)                                     | 0.44 |
| <i>Cdca5</i>      | NM_026410.1    | cell division cycle associated 5 (Cdca5)                                     | 0.57 |
| <i>Cdca7</i>      | NM_025866.3    | cell division cycle associated 7 (Cdca7)                                     | 0.17 |
| <i>Cdca8</i>      | NM_026560.3    | cell division cycle associated 8 (Cdca8)                                     | 0.14 |
| <i>Cdh13</i>      | NM_019707.4    | cadherin 13 (Cdh13)                                                          | 0.20 |
| <i>Cdh4</i>       | NM_009867.1    | cadherin 4 (Cdh4)                                                            | 0.63 |
| <i>Cdk2</i>       | NM_183417.2    | cyclin-dependent kinase 2 (Cdk2), transcript variant 1                       | 0.31 |
| <i>Cdk4</i>       | NM_009870.2    | cyclin-dependent kinase 4 (Cdk4)                                             | 0.43 |
| <i>Cdk5r1</i>     | NM_009871.2    | cyclin-dependent kinase 5, regulatory subunit 1 (p35) (Cdk5r1)               | 0.54 |
| <i>Cdk8</i>       | NM_153599.3    | cyclin-dependent kinase 8 (Cdk8)                                             | 0.59 |
| <i>Cdkn2aipnl</i> | NM_029976.2    | CDKN2A interacting protein N-terminal like (Cdkn2aipnl)                      | 0.50 |
| <i>Cdkn3</i>      | XM_919022.2    | PREDICTED: cyclin-dependent kinase inhibitor 3, transcript variant 5 (Cdkn3) | 0.25 |
| <i>Cdon</i>       | AK040711       |                                                                              | 0.53 |
| <i>Cdr2</i>       | NM_007672.1    | cerebellar degeneration-related 2 (Cdr2)                                     | 0.44 |
| <i>Cdr2l</i>      | NM_001080929.1 | cerebellar degeneration-related protein 2-like (Cdr2l)                       | 0.42 |
| <i>Cdt1</i>       | NM_026014.3    | chromatin licensing and DNA replication factor 1 (Cdt1)                      | 0.29 |
| <i>Cenpa</i>      | NM_007681.2    | centromere protein A (Cenpa)                                                 | 0.06 |
| <i>Cenpf</i>      | XM_916605.2    | PREDICTED: centromere autoantigen F, transcript variant 3 (Cenpf)            | 0.23 |
| <i>Cenph</i>      | NM_021886.1    | centromere protein H (Cenph)                                                 | 0.65 |
| <i>Cenpi</i>      | NM_145924.2    | centromere protein I (Cenpi)                                                 | 0.57 |
| <i>Cenpk</i>      | NM_021790.1    | centromere protein K (Cenpk), transcript variant 1                           | 0.42 |
| <i>Cenpl</i>      | NM_027429.1    | centromere protein L (Cenpl)                                                 | 0.41 |
| <i>Cenpm</i>      | NM_025639.4    | centromere protein M (Cenpm), transcript variant 1                           | 0.63 |
| <i>Cenpn</i>      | NM_028131.3    | centromere protein N (Cenpn)                                                 | 0.55 |
| <i>Cenpp</i>      | NM_025495.1    | centromere protein P (Cenpp)                                                 | 0.59 |
| <i>Cenpq</i>      | NM_031863.3    | centromere protein Q (Cenpq)                                                 | 0.55 |
| <i>Cenpt</i>      | NM_177150.2    | centromere protein T (Cenpt)                                                 | 0.63 |
| <i>Centd1</i>     | XM_001001363.1 | PREDICTED: centaurin, delta 1, transcript variant 5 (Centd1)                 | 0.60 |
| <i>Cep170</i>     | NM_001099637.1 | centrosomal protein 170 (Cep170)                                             | 0.48 |
| <i>Cep55</i>      | NM_028760.1    | centrosomal protein 55 (Cep55)                                               | 0.60 |
| <i>Cep78</i>      | NM_198019.2    | centrosomal protein 78 (Cep78)                                               | 0.52 |
| <i>Cetn3</i>      | NM_007684.3    | centrin 3 (Cetn3)                                                            | 0.62 |
| <i>Cfl1</i>       | NM_007687.2    | cofilin 1, non-muscle (Cfl1)                                                 | 0.41 |
| <i>Chaf1a</i>     | NM_013733.3    | chromatin assembly factor 1, subunit A (p150) (Chaf1a)                       | 0.60 |
| <i>Chaf1b</i>     | NM_028083.3    | chromatin assembly factor 1, subunit B (p60) (Chaf1b)                        | 0.31 |
| <i>Chchd1</i>     | NM_025366.2    | coiled-coil-helix-coiled-coil-helix domain containing 1 (Chchd1)             | 0.50 |
| <i>Chchd8</i>     | NM_183270.2    | coiled-coil-helix-coiled-coil-helix domain containing 8 (Chchd8)             | 0.64 |
| <i>Chd1</i>       | AK021188       |                                                                              | 0.58 |
| <i>Chd4</i>       | NM_145979.2    | chromodomain helicase DNA binding protein 4 (Chd4)                           | 0.63 |
| <i>Chfr</i>       | NM_172717.1    | checkpoint with forkhead and ring finger domains (Chfr)                      | 0.47 |
| <i>Chmp4b</i>     | NM_029362.3    | chromatin modifying protein 4B (Chmp4b)                                      | 0.59 |

|                    |                |                                                                                                                                                |      |
|--------------------|----------------|------------------------------------------------------------------------------------------------------------------------------------------------|------|
| <i>Chn2</i>        | NM_023543.1    | chimerin (chimaerin) 2 (Chn2)                                                                                                                  | 0.23 |
| <i>Chrm3</i>       | NM_033269.2    | cholinergic receptor, muscarinic 3, cardiac (Chrm3)                                                                                            | 0.55 |
| <i>Chst2</i>       | NM_018763.1    | carbohydrate sulfotransferase 2 (Chst2)                                                                                                        | 0.35 |
| <i>Chst7</i>       | NM_021715.1    | carbohydrate (N-acetylglucosamino) sulfotransferase 7 (Chst7)                                                                                  | 0.12 |
| <i>Chtf18</i>      | NM_145409.1    | CTF18, chromosome transmission fidelity factor 18 homolog (S. cerevisiae) (Chtf18)                                                             | 0.53 |
| <i>Cirh1a</i>      | NM_011574.1    | cirrhosis, autosomal recessive 1A (human) (Cirh1a)                                                                                             | 0.65 |
| <i>Ckap2</i>       | XM_134100.3    |                                                                                                                                                | 0.39 |
| <i>Ckap2l</i>      | NM_181589.2    | cytoskeleton associated protein 2-like (Ckap2l)                                                                                                | 0.56 |
| <i>Cldnd1</i>      | NM_171826.2    | claudin domain containing 1 (Cldnd1)                                                                                                           | 0.52 |
| <i>Clic4</i>       | NM_013885.2    | chloride intracellular channel 4 (mitochondrial) (Clic4), nuclear gene encoding mitochondrial protein                                          | 0.47 |
| <i>Clic5</i>       | NM_172621.2    | chloride intracellular channel 5 (Clic5)                                                                                                       | 0.66 |
| <i>Cln5</i>        | XM_127882.3    |                                                                                                                                                | 0.56 |
| <i>Clns1a</i>      | NM_023671.1    | chloride channel, nucleotide-sensitive, 1A (Clns1a)                                                                                            | 0.55 |
| <i>Clspn</i>       | NM_175554.3    | claspin homolog (Xenopus laevis) (Clspn)                                                                                                       | 0.27 |
| <i>CltA</i>        | NM_001080385.1 | clathrin, light polypeptide (Lca) (CltA), transcript variant 2                                                                                 | 0.64 |
| <i>Cltc</i>        | NM_001003908   |                                                                                                                                                | 0.58 |
| <i>Cmas</i>        | NM_009908.1    | cytidine monophospho-N-acetylneuraminic acid synthetase (Cmas)                                                                                 | 0.53 |
| <i>Cmc1</i>        | NM_026442.2    | COX assembly mitochondrial protein homolog (S. cerevisiae) (Cmc1), nuclear gene encoding mitochondrial protein                                 | 0.61 |
| <i>Cmpk</i>        | NM_025647.2    | cytidylate kinase (Cmpk)                                                                                                                       | 0.54 |
| <i>Cnih</i>        | NM_009919.1    | cornichon homolog (Drosophila) (Cnih)                                                                                                          | 0.61 |
| <i>Cnih4</i>       | NM_030131.2    | cornichon homolog 4 (Drosophila) (Cnih4)                                                                                                       | 0.49 |
| <i>Cntnap4</i>     | NM_130457      |                                                                                                                                                | 0.43 |
| <i>Col16a1</i>     | NM_028266.4    | collagen, type XVI, alpha 1 (Col16a1)                                                                                                          | 0.23 |
| <i>Col18a1</i>     | NM_009929.2    | procollagen, type XVIII, alpha 1 (Col18a1)                                                                                                     | 0.08 |
| <i>Col4a1</i>      | NM_009931.1    | procollagen, type IV, alpha 1 (Col4a1)                                                                                                         | 0.62 |
| <i>Commd1</i>      | NM_144514.2    | COMM domain containing 1 (Commd1)                                                                                                              | 0.62 |
| <i>Commd10</i>     | NM_178377.4    | COMM domain containing 10 (Commd10)                                                                                                            | 0.64 |
| <i>Cops2</i>       | NM_009939.2    | COP9 (constitutive photomorphogenic) homolog, subunit 2 (Arabidopsis thaliana) (Cops2)                                                         | 0.62 |
| <i>Cops7a</i>      | NM_012003.1    | COP9 (constitutive photomorphogenic) homolog, subunit 7a (Arabidopsis thaliana) (Cops7a)                                                       | 0.62 |
| <i>Coq9</i>        | NM_026452.2    | coenzyme Q9 homolog (yeast) (Coq9)                                                                                                             | 0.64 |
| <i>Coro1c</i>      | NM_011779.3    | coronin, actin binding protein 1C (Coro1c)                                                                                                     | 0.48 |
| <i>Cox10</i>       | NM_178379.2    | COX10 homolog, cytochrome c oxidase assembly protein, heme A: farnesyltransferase (yeast) (Cox10), nuclear gene encoding mitochondrial protein | 0.60 |
| <i>Cox15</i>       | NM_144874.3    | COX15 homolog, cytochrome c oxidase assembly protein (yeast) (Cox15), nuclear gene encoding mitochondrial protein                              | 0.54 |
| <i>Cox17</i>       | NM_001017429.2 | cytochrome c oxidase, subunit XVII assembly protein homolog (yeast) (Cox17)                                                                    | 0.66 |
| <i>Cox18</i>       | NM_001033310.1 | COX18 cytochrome c oxidase assembly homolog (S. cerevisiae) (Cox18)                                                                            | 0.53 |
| <i>Cox5a</i>       | NM_007747.2    | cytochrome c oxidase, subunit Va (Cox5a), nuclear gene encoding mitochondrial protein                                                          | 0.55 |
| <i>Cox6a1</i>      | NM_007748.2    |                                                                                                                                                | 0.64 |
| <i>Cox6c</i>       | NM_053071.2    | cytochrome c oxidase, subunit VIc (Cox6c)                                                                                                      | 0.65 |
| <i>Cox7a2</i>      | NM_009945.3    | cytochrome c oxidase, subunit VIIa 2 (Cox7a2)                                                                                                  | 0.51 |
| <i>Cox7a2l</i>     | NM_009187.1    | cytochrome c oxidase subunit VIIa polypeptide 2-like (Cox7a2l)                                                                                 | 0.64 |
| <i>Cpeb4</i>       | NM_026252      |                                                                                                                                                | 0.60 |
| <i>Cplx1</i>       | NM_007756.2    | complexin 1 (Cplx1)                                                                                                                            | 0.58 |
| <i>Cpne8</i>       | NM_001033851.1 | copine VIII (Cpne8), transcript variant 2                                                                                                      | 0.56 |
| <i>Crispld2</i>    | NM_030209.2    | cysteine-rich secretory protein LCCL domain containing 2 (Crispld2)                                                                            | 0.66 |
| <i>Crif3</i>       | NM_018776.1    | cytokine receptor-like factor 3 (Crif3)                                                                                                        | 0.65 |
| <i>Crtap</i>       | NM_019922.1    | cartilage associated protein (Crtap)                                                                                                           | 0.53 |
| <i>Cs</i>          | NM_026444.3    | citrate synthase (Cs), nuclear gene encoding mitochondrial protein                                                                             | 0.42 |
| <i>Csad</i>        | NM_144942.1    | cysteine sulfenic acid decarboxylase (Csad)                                                                                                    | 0.57 |
| <i>Csda</i>        | NM_139117.2    | cold shock domain protein A (Csda)                                                                                                             | 0.55 |
| <i>Cse1l</i>       | NM_023565.2    | chromosome segregation 1-like (S. cerevisiae) (Cse1l)                                                                                          | 0.50 |
| <i>Csnk1d</i>      | NM_027874.2    | casein kinase 1, delta (Csnk1d), transcript variant 2                                                                                          | 0.48 |
| <i>Csnk1e</i>      | NM_013767.5    | casein kinase 1, epsilon (Csnk1e)                                                                                                              | 0.60 |
| <i>Csnk1g3</i>     | NM_152809.2    | casein kinase 1, gamma 3 (Csnk1g3)                                                                                                             | 0.65 |
| <i>Csnk2a1-rs3</i> | AK031617       |                                                                                                                                                | 0.59 |
| <i>Csnk2a2</i>     | NM_009974.2    | casein kinase 2, alpha prime polypeptide (Csnk2a2)                                                                                             | 0.59 |
| <i>Cspg5</i>       | NM_013884.2    | chondroitin sulfate proteoglycan 5 (Cspg5)                                                                                                     | 0.36 |
| <i>Csrp2</i>       | NM_007792.3    | cysteine and glycine-rich protein 2 (Csrp2)                                                                                                    | 0.47 |
| <i>Cstf1</i>       | NM_024199.2    | cleavage stimulation factor, 3' pre-RNA, subunit 1 (Cstf1)                                                                                     | 0.65 |
| <i>Cstf2</i>       | NM_133196.5    | cleavage stimulation factor, 3' pre-RNA subunit 2 (Cstf2)                                                                                      | 0.59 |
| <i>Cstf3</i>       | NM_145529.2    | cleavage stimulation factor, 3' pre-RNA, subunit 3 (Cstf3), transcript variant 1                                                               | 0.66 |



|                      |             |                                                                                                    |      |
|----------------------|-------------|----------------------------------------------------------------------------------------------------|------|
| <i>Ctdspl2</i>       | NM_212450.3 | CTD (carboxy-terminal domain, RNA polymerase II, polypeptide A) small phosphatase like 2 (Ctdspl2) | 0.65 |
| <i>Ctgf</i>          | NM_010217   |                                                                                                    | 0.63 |
| <i>Ctps</i>          | NM_016748.1 | cytidine 5'-triphosphate synthase (Ctps)                                                           | 0.66 |
| <i>Ctsc</i>          | NM_009982.3 | cathepsin C (Ctsc)                                                                                 | 0.34 |
| <i>Ctnb2nl</i>       | NM_030249.3 | CTTNBP2 N-terminal like (Ctnb2nl)                                                                  | 0.40 |
| <i>Cugbp2</i>        | NM_010160.2 | CUG triplet repeat, RNA binding protein 2 (Cugbp2), transcript variant 6                           | 0.45 |
| <i>Cul3</i>          | NM_016716.4 | cullin 3 (Cul3)                                                                                    | 0.53 |
| <i>Cx3cl1</i>        | NM_009142.3 | chemokine (C-X3-C motif) ligand 1 (Cx3cl1)                                                         | 0.46 |
| <i>Cxadr</i>         | NM_009988   |                                                                                                    | 0.44 |
| <i>Cxcl4</i>         | NM_019932.2 | chemokine (C-X-C motif) ligand 4 (Cxcl4)                                                           | 0.46 |
| <i>Cyb5r4</i>        | NM_024195.1 | cytochrome b5 reductase 4 (Cyb5r4)                                                                 | 0.62 |
| <i>Cyc1</i>          | NM_025567.2 | cytochrome c-1 (Cyc1)                                                                              | 0.40 |
| <i>Cycs</i>          | NM_007808.4 | cytochrome c, somatic (Cycs), nuclear gene encoding mitochondrial protein                          | 0.37 |
| <i>Cyp51</i>         | NM_020010.2 | cytochrome P450, family 51 (Cyp51)                                                                 | 0.30 |
| <i>D030038A19Rik</i> | AK083512    |                                                                                                    | 0.55 |
| <i>D030056L22Rik</i> | NM_177640.4 | RIKEN cDNA D030056L22 gene (D030056L22Rik)                                                         | 0.53 |
| <i>D030063E12</i>    |             |                                                                                                    | 0.62 |
| <i>D10Ert322e</i>    | NM_026065.2 | DNA segment, Chr 10, ERATO Doi 322, expressed (D10Ert322e)                                         | 0.57 |
| <i>D10Wsu102e</i>    | NM_026579.2 | DNA segment, Chr 10, Wayne State University 102, expressed (D10Wsu102e)                            | 0.59 |
| <i>D10Wsu52e</i>     | NM_145422.3 | DNA segment, Chr 10, Wayne State University 52, expressed (D10Wsu52e)                              | 0.61 |
| <i>D12Ert553e</i>    | NM_029758.3 | DNA segment, Chr 12, ERATO Doi 553, expressed (D12Ert553e)                                         | 0.59 |
| <i>D12Wsu95e</i>     | NM_198023   |                                                                                                    | 0.45 |
| <i>D130004H04Rik</i> |             |                                                                                                    | 0.60 |
| <i>D17H6S56E-5</i>   | NM_033075.2 | DNA segment, Chr 17, human D6S56E 5 (D17H6S56E-5)                                                  | 0.54 |
| <i>D17Wsu104e</i>    | NM_080837.1 |                                                                                                    | 0.55 |
| <i>D19Bwg1357e</i>   | NM_177474.4 | DNA segment, Chr 19, Brigham & Women's Genetics 1357 expressed (D19Bwg1357e)                       | 0.51 |
| <i>D1Ert471e</i>     |             |                                                                                                    | 0.33 |
| <i>D2Bwg1335e</i>    | NM_026828.2 | DNA segment, Chr 2, Brigham & Women's Genetics 1335 expressed (D2Bwg1335e)                         | 0.51 |
| <i>D2Ert750e</i>     | NM_026412.1 | DNA segment, Chr 2, ERATO Doi 750, expressed (D2Ert750e)                                           | 0.37 |
| <i>D4Bwg0951e</i>    | NM_026821.4 | DNA segment, Chr 4, Brigham & Women's Genetics 0951 expressed (D4Bwg0951e)                         | 0.47 |
| <i>D6Wsu176e</i>     | NM_138587.4 | DNA segment, Chr 6, Wayne State University 176, expressed (D6Wsu176e)                              | 0.53 |
| <i>D930028F11Rik</i> | NM_172921.2 | RIKEN cDNA D930028F11 gene (D930028F11Rik)                                                         | 0.56 |
| <i>D930046M13Rik</i> |             |                                                                                                    | 0.28 |
| <i>D9Wsu20e</i>      | NM_133718   |                                                                                                    | 0.43 |
| <i>Dab2</i>          | NM_023118.1 |                                                                                                    | 0.60 |
| <i>Dazap1</i>        | NM_133188.1 | DAZ associated protein 1 (Dazap1)                                                                  | 0.53 |
| <i>Dbf4</i>          | NM_013726.2 | DBF4 homolog (S. cerevisiae) (Dbf4)                                                                | 0.25 |
| <i>Dbt</i>           | NM_010022.1 | dihydrolipoamide branched chain transacylase E2 (Dbt)                                              | 0.64 |
| <i>Dbx2</i>          | XM_147966.3 |                                                                                                    | 0.48 |
| <i>Dcbl1d1</i>       | NM_025705.2 | discoidin, CUB and LCCL domain containing 1 (Dcbl1d1)                                              | 0.60 |
| <i>Dclk1</i>         | NM_019978.2 | doublecortin-like kinase 1 (Dclk1)                                                                 | 0.23 |
| <i>Dclk2</i>         | NM_027539.3 | doublecortin-like kinase 2 (Dclk2)                                                                 | 0.61 |
| <i>Dcun1d5</i>       | NM_029775.2 | DCN1, defective in cullin neddylation 1, domain containing 5 (S. cerevisiae) (Dcun1d5)             | 0.60 |
| <i>Ddah1</i>         | NM_026993   |                                                                                                    | 0.48 |
| <i>Ddost</i>         | NM_007838.2 | dolichyl-di-phosphooligosaccharide-protein glycotransferase (Ddost)                                | 0.58 |
| <i>Ddx1</i>          | NM_134040.1 | DEAD (Asp-Glu-Ala-Asp) box polypeptide 1 (Ddx1)                                                    | 0.63 |
| <i>Ddx11</i>         | XM_128714.3 |                                                                                                    | 0.36 |
| <i>Ddx20</i>         | NM_017397.2 | DEAD (Asp-Glu-Ala-Asp) box polypeptide 20 (Ddx20)                                                  | 0.60 |
| <i>Ddx21</i>         | NM_019553.2 | DEAD (Asp-Glu-Ala-Asp) box polypeptide 21 (Ddx21)                                                  | 0.50 |
| <i>Ddx25</i>         | NM_013932.3 | DEAD (Asp-Glu-Ala-Asp) box polypeptide 25 (Ddx25)                                                  | 0.56 |
| <i>Ddx26</i>         | NM_008715   |                                                                                                    | 0.56 |
| <i>Ddx27</i>         | NM_153065.2 | DEAD (Asp-Glu-Ala-Asp) box polypeptide 27 (Ddx27)                                                  | 0.67 |
| <i>Ddx3x</i>         | NM_010028.2 | DEAD/H (Asp-Glu-Ala-Asp/His) box polypeptide 3, X-linked (Ddx3x)                                   | 0.59 |
| <i>Ddx54</i>         | NM_028041.2 | DEAD (Asp-Glu-Ala-Asp) box polypeptide 54 (Ddx54)                                                  | 0.54 |
| <i>Ddx6</i>          | NM_007841.3 | DEAD (Asp-Glu-Ala-Asp) box polypeptide 6 (Ddx6)                                                    | 0.51 |
| <i>Deb1</i>          | NM_026794.2 | differentially expressed in B16F10 1 (Deb1)                                                        | 0.53 |
| <i>Dek</i>           | NM_025900.1 | DEK oncogene (DNA binding) (Dek)                                                                   | 0.60 |
| <i>Dennd2a</i>       | NM_172477.3 | DENN/MADD domain containing 2A (Dennd2a)                                                           | 0.33 |
| <i>Dgkb</i>          | NM_178681   |                                                                                                    | 0.55 |
| <i>Dgkd</i>          |             |                                                                                                    | 0.52 |
| <i>Dgkk</i>          | NM_177914.2 | diacylglycerol kinase kappa (Dgkk)                                                                 | 0.43 |
| <i>Dgkz</i>          | NM_138306.1 | diacylglycerol kinase zeta (Dgkz)                                                                  | 0.43 |
| <i>Dhcr24</i>        | XM_131538.1 |                                                                                                    | 0.45 |
| <i>Dhcr7</i>         | NM_007856.2 | 7-dehydrocholesterol reductase (Dhcr7)                                                             | 0.40 |
| <i>Dhh</i>           | NM_007857.3 | desert hedgehog (Dhh)                                                                              | 0.41 |

|                      |                |                                                                                                                               |      |
|----------------------|----------------|-------------------------------------------------------------------------------------------------------------------------------|------|
| <i>Dhrsx</i>         | NM_001033326.2 | dehydrogenase/reductase (SDR family) X chromosome ( <i>Dhrsx</i> )                                                            | 0.58 |
| <i>Dhx15</i>         | NM_007839.2    | DEAH (Asp-Glu-Ala-His) box polypeptide 15 ( <i>Dhx15</i> ), transcript variant 2                                              | 0.57 |
| <i>Diras2</i>        | NM_001024474.2 | DIRAS family, GTP-binding RAS-like 2 ( <i>Diras2</i> )                                                                        | 0.40 |
| <i>Dlg5</i>          | XM_981375.2    | PREDICTED: discs, large homolog 5 ( <i>Drosophila</i> ) ( <i>Dlg5</i> )                                                       | 0.66 |
| <i>Dlgap5</i>        | NM_144553.1    | discs, large ( <i>Drosophila</i> ) homolog-associated protein 5 ( <i>Dlgap5</i> )                                             | 0.47 |
| <i>Dlst</i>          | NM_030225      |                                                                                                                               | 0.53 |
| <i>Dnahc11</i>       | NM_010060.2    | dynein, axonemal, heavy chain 11 ( <i>Dnahc11</i> )                                                                           | 0.30 |
| <i>Dnajb11</i>       | XM_148071.1    |                                                                                                                               | 0.51 |
| <i>Dnajc2</i>        | NM_009584.3    | DnaJ (Hsp40) homolog, subfamily C, member 2 ( <i>Dnajc2</i> )                                                                 | 0.48 |
| <i>Dnclc1</i>        | NM_019682      |                                                                                                                               | 0.58 |
| <i>Dnmt1</i>         | NM_010066.3    | DNA methyltransferase (cytosine-5) 1 ( <i>Dnmt1</i> )                                                                         | 0.36 |
| <i>Dock1</i>         | NM_001033420.2 | dedicator of cytokinesis 1 ( <i>Dock1</i> )                                                                                   | 0.62 |
| <i>Dock10</i>        | XM_129913.4    |                                                                                                                               | 0.36 |
| <i>Dos</i>           | NM_015761.2    | downstream of Stk11 ( <i>Dos</i> )                                                                                            | 0.60 |
| <i>Dph2</i>          | NM_026344.3    | DPH2 homolog ( <i>S. cerevisiae</i> ) ( <i>Dph2</i> )                                                                         | 0.63 |
| <i>Dpp3</i>          | NM_133803.1    | dipeptidylpeptidase 3 ( <i>Dpp3</i> )                                                                                         | 0.66 |
| <i>Dpy30</i>         | NM_024428.3    | dpy-30 homolog ( <i>C. elegans</i> ) ( <i>Dpy30</i> )                                                                         | 0.61 |
| <i>Dpysl3</i>        | NM_009468.3    | dihydropyrimidinase-like 3 ( <i>Dpysl3</i> )                                                                                  | 0.45 |
| <i>Drctnb1a</i>      | NM_053090      |                                                                                                                               | 0.48 |
| <i>Drg1</i>          | NM_007879.1    | developmentally regulated GTP binding protein 1 ( <i>Drg1</i> )                                                               | 0.65 |
| <i>Dtymk</i>         | NM_023136      |                                                                                                                               | 0.60 |
| <i>Dus4l</i>         | NM_028002.2    | dihydrouridine synthase 4-like ( <i>S. cerevisiae</i> ) ( <i>Dus4l</i> )                                                      | 0.66 |
| <i>Dusp11</i>        | NM_028099.2    | dual specificity phosphatase 11 (RNA/RNP complex 1-interacting) ( <i>Dusp11</i> )                                             | 0.63 |
| <i>Dusp4</i>         | NM_176933.4    | dual specificity phosphatase 4 ( <i>Dusp4</i> )                                                                               | 0.34 |
| <i>Dusp6</i>         | NM_026268.2    | dual specificity phosphatase 6 ( <i>Dusp6</i> )                                                                               | 0.10 |
| <i>Dusp7</i>         | NM_153459.2    | dual specificity phosphatase 7 ( <i>Dusp7</i> )                                                                               | 0.23 |
| <i>Dynll1</i>        | NM_019682.2    | dynein light chain LC8-type 1 ( <i>Dynll1</i> )                                                                               | 0.54 |
| <i>E030026110Rik</i> | NM_175553      |                                                                                                                               | 0.61 |
| <i>E130016E03Rik</i> | NM_001039556.2 | RIKEN cDNA E130016E03 gene ( <i>E130016E03Rik</i> )                                                                           | 0.31 |
| <i>E130306D19Rik</i> | XM_131404.3    |                                                                                                                               | 0.47 |
| <i>E230013M07Rik</i> | AK054036       |                                                                                                                               | 0.25 |
| <i>E2f1</i>          | NM_007891.3    | E2F transcription factor 1 ( <i>E2f1</i> )                                                                                    | 0.33 |
| <i>E2f2</i>          | NM_177733.2    | E2F transcription factor 2 ( <i>E2f2</i> )                                                                                    | 0.54 |
| <i>E330016A19Rik</i> | NM_173386.3    | RIKEN cDNA E330016A19 gene ( <i>E330016A19Rik</i> )                                                                           | 0.41 |
| <i>E430028B21Rik</i> | NM_178668.3    | RIKEN cDNA E430028B21 gene ( <i>E430028B21Rik</i> )                                                                           | 0.60 |
| <i>E430039I23Rik</i> | AK089103       |                                                                                                                               | 0.58 |
| <i>E530011J04Rik</i> | AK089133       |                                                                                                                               | 0.55 |
| <i>Ebna1bp2</i>      | NM_026932.3    | EBNA1 binding protein 2 ( <i>Ebna1bp2</i> )                                                                                   | 0.48 |
| <i>Ece1</i>          | NM_199307.1    | endothelin converting enzyme 1 ( <i>Ece1</i> )                                                                                | 0.44 |
| <i>Ecm1</i>          | NM_007899.1    | extracellular matrix protein 1 ( <i>Ecm1</i> )                                                                                | 0.58 |
| <i>Eed</i>           | NM_021876.2    | embryonic ectoderm development ( <i>Eed</i> )                                                                                 | 0.65 |
| <i>Eef1a1</i>        | NM_010106.2    | eukaryotic translation elongation factor 1 alpha 1 ( <i>Eef1a1</i> )                                                          | 0.60 |
| <i>Eef1b2</i>        | NM_018796.2    | eukaryotic translation elongation factor 1 beta 2 ( <i>Eef1b2</i> )                                                           | 0.48 |
| <i>Eef1d</i>         | NM_023240.2    | eukaryotic translation elongation factor 1 delta (guanine nucleotide exchange protein) ( <i>Eef1d</i> ), transcript variant 2 | 0.66 |
| <i>Eef1e1</i>        | NM_025380.2    | eukaryotic translation elongation factor 1 epsilon 1 ( <i>Eef1e1</i> )                                                        | 0.34 |
| <i>Eef1g</i>         | NM_026007.4    | eukaryotic translation elongation factor 1 gamma ( <i>Eef1g</i> )                                                             | 0.54 |
| <i>Eef2</i>          | NM_007907.1    | eukaryotic translation elongation factor 2 ( <i>Eef2</i> )                                                                    | 0.58 |
| <i>Efnb1</i>         | NM_010110.2    | ephrin B1 ( <i>Efnb1</i> )                                                                                                    | 0.64 |
| <i>Efs</i>           | NM_010112.3    | embryonal Fyn-associated substrate ( <i>Efs</i> )                                                                             | 0.52 |
| <i>EG216185</i>      | XM_911906.3    | PREDICTED: predicted gene, EG216185 ( <i>EG216185</i> )                                                                       | 0.58 |
| <i>EG237361</i>      | XM_905111.2    | PREDICTED: predicted gene, EG237361 ( <i>EG237361</i> )                                                                       | 0.44 |
| <i>EG243642</i>      | XM_145024.8    | PREDICTED: predicted gene, EG243642 ( <i>EG243642</i> )                                                                       | 0.41 |
| <i>EG245297</i>      | NM_001018086.2 | predicted gene, EG245297 ( <i>EG245297</i> )                                                                                  | 0.65 |
| <i>EG268795</i>      | XM_921134.3    | PREDICTED: predicted gene, EG268795, transcript variant 4 ( <i>EG268795</i> )                                                 | 0.44 |
| <i>EG382843</i>      | XM_905000.3    | PREDICTED: predicted gene, EG382843 ( <i>EG382843</i> )                                                                       | 0.66 |
| <i>EG432681</i>      | XM_484165.5    | PREDICTED: predicted gene, EG432681 ( <i>EG432681</i> )                                                                       | 0.51 |
| <i>EG432721</i>      | XM_484210.5    | PREDICTED: predicted gene, EG432721 ( <i>EG432721</i> )                                                                       | 0.44 |
| <i>EG432879</i>      | NM_001034882.2 | predicted gene, EG432879 ( <i>EG432879</i> )                                                                                  | 0.55 |
| <i>EG433144</i>      | XM_484670.5    | PREDICTED: predicted gene, EG433144 ( <i>EG433144</i> )                                                                       | 0.66 |
| <i>EG433182</i>      | NM_001025388.1 | predicted gene, EG433182 ( <i>EG433182</i> )                                                                                  | 0.67 |
| <i>EG433923</i>      | NM_001081233.1 | predicted gene, EG433923 ( <i>EG433923</i> )                                                                                  | 0.45 |
| <i>EG434404</i>      | XM_486222.5    | PREDICTED: predicted gene, EG434404 ( <i>EG434404</i> )                                                                       | 0.58 |
| <i>EG434858</i>      | NR_002883.1    | predicted gene, EG434858 ( <i>EG434858</i> ), non-coding RNA.                                                                 | 0.67 |
| <i>EG545056</i>      | NR_002889.2    | predicted gene, EG545056 ( <i>EG545056</i> ), non-coding RNA.                                                                 | 0.62 |
| <i>EG622236</i>      | XM_917756.3    | PREDICTED: predicted gene, EG622236, transcript variant 1 ( <i>EG622236</i> )                                                 | 0.50 |
| <i>EG622339</i>      | NM_001081297.1 | predicted gene, EG622339 ( <i>EG622339</i> )                                                                                  | 0.64 |
| <i>EG623818</i>      | XM_888318.3    | PREDICTED: predicted gene, EG623818 ( <i>EG623818</i> )                                                                       | 0.50 |
| <i>EG624124</i>      | XM_889835.2    | PREDICTED: predicted gene, EG624124, transcript variant 1 ( <i>EG624124</i> )                                                 | 0.55 |
| <i>EG625917</i>      | XM_917009.3    | PREDICTED: predicted gene, EG625917 ( <i>EG625917</i> )                                                                       | 0.56 |
| <i>EG626175</i>      | XM_908326.3    | PREDICTED: predicted gene, EG626175 ( <i>EG626175</i> )                                                                       | 0.41 |

|                 |                |                                                                                                              |      |
|-----------------|----------------|--------------------------------------------------------------------------------------------------------------|------|
| <i>EG629595</i> | XM_894495.2    | PREDICTED: predicted gene, EG629595 (EG629595)                                                               | 0.51 |
| <i>EG632248</i> | XM_001473902.1 | PREDICTED: predicted gene, EG632248 (EG632248)                                                               | 0.54 |
| <i>EG633120</i> | XR_031485.1    | PREDICTED: predicted gene, EG633120 (EG633120), misc RNA.                                                    | 0.56 |
| <i>EG637748</i> | XM_917238.2    | PREDICTED: predicted gene, EG637748 (EG637748)                                                               | 0.59 |
| <i>EG665369</i> | XM_912043.2    | PREDICTED: predicted gene, EG665369 (EG665369)                                                               | 0.51 |
| <i>EG666577</i> | XM_984280.2    | PREDICTED: predicted gene, EG666577 (EG666577)                                                               | 0.46 |
| <i>EG666609</i> | XM_984926.2    | PREDICTED: predicted gene, EG666609 (EG666609)                                                               | 0.66 |
| <i>EG667190</i> | XR_002058.1    | PREDICTED: predicted gene, EG667190 (EG667190), misc RNA.                                                    | 0.38 |
| <i>EG667728</i> | XR_035278.1    | PREDICTED: predicted gene, EG667728 (EG667728), misc RNA.                                                    | 0.31 |
| <i>EG668668</i> | NM_001081036.1 | predicted gene, EG668668 (EG668668)                                                                          | 0.57 |
| <i>EG668829</i> | XM_001005405.1 | PREDICTED: predicted gene, EG668829 (EG668829)                                                               | 0.48 |
| <i>EG668850</i> | XR_002259.2    | PREDICTED: predicted gene, EG668850 (EG668850), misc RNA.                                                    | 0.60 |
| <i>Egfr</i>     | NM_007912.4    | epidermal growth factor receptor (Egfr), transcript variant 2                                                | 0.64 |
| <i>Egr3</i>     | NM_018781      |                                                                                                              | 0.54 |
| <i>Ehd4</i>     | NM_133838.4    | EH-domain containing 4 (Ehd4)                                                                                | 0.36 |
| <i>Eif1a</i>    | NM_010120.4    | eukaryotic translation initiation factor 1A (Eif1a)                                                          | 0.63 |
| <i>Eif1ad</i>   | NM_027236.2    | eukaryotic translation initiation factor 1A domain containing (Eif1ad)                                       | 0.49 |
| <i>Eif2b1</i>   | NM_145371.3    | eukaryotic translation initiation factor 2B, subunit 1 (alpha) (Eif2b1)                                      | 0.66 |
| <i>Eif2b3</i>   | XM_131572.4    |                                                                                                              | 0.62 |
| <i>Eif2s2</i>   | NM_026030.2    | eukaryotic translation initiation factor 2, subunit 2 (beta) (Eif2s2)                                        | 0.46 |
| <i>Eif2s3x</i>  | NM_012010.3    | eukaryotic translation initiation factor 2, subunit 3, structural gene X-linked (Eif2s3x)                    | 0.52 |
| <i>Eif3a</i>    | NM_010123.3    | eukaryotic translation initiation factor 3, subunit A (Eif3a)                                                | 0.57 |
| <i>Eif3b</i>    | NM_133916.2    | eukaryotic translation initiation factor 3, subunit B (Eif3b)                                                | 0.66 |
| <i>Eif3d</i>    | NM_018749.2    | eukaryotic translation initiation factor 3, subunit D (Eif3d)                                                | 0.58 |
| <i>Eif3eip</i>  | NM_145139.2    | eukaryotic translation initiation factor 3, subunit E interacting protein (Eif3eip)                          | 0.60 |
| <i>Eif3g</i>    | NM_016876.3    | eukaryotic translation initiation factor 3, subunit G (Eif3g)                                                | 0.51 |
| <i>Eif3i</i>    | NM_018799.1    | eukaryotic translation initiation factor 3, subunit I (Eif3i)                                                | 0.57 |
| <i>Eif3s1</i>   | NM_144545.2    | eukaryotic translation initiation factor 3, subunit 1 alpha (Eif3s1)                                         | 0.66 |
| <i>Eif3s4</i>   | NM_016876.2    |                                                                                                              | 0.48 |
| <i>Eif4a1</i>   | NM_144958.2    | eukaryotic translation initiation factor 4A1 (Eif4a1)                                                        | 0.32 |
| <i>Eif4a3</i>   | NM_138669.1    | eukaryotic translation initiation factor 4A, isoform 3 (Eif4a3)                                              | 0.64 |
| <i>Eif4ebp1</i> | NM_007918.3    | eukaryotic translation initiation factor 4E binding protein 1 (Eif4ebp1)                                     | 0.53 |
| <i>Eif4el3</i>  | NM_023314.2    |                                                                                                              | 0.53 |
| <i>Eif4g1</i>   | NM_001005331.1 | eukaryotic translation initiation factor 4, gamma 1 (Eif4g1), transcript variant 2                           | 0.61 |
| <i>Eif4g2</i>   | NM_013507.2    |                                                                                                              | 0.66 |
| <i>Eif4h</i>    | NM_033561.1    | eukaryotic translation initiation factor 4H (Eif4h)                                                          | 0.62 |
| <i>Eif5</i>     | NM_173363.4    | eukaryotic translation initiation factor 5 (Eif5), transcript variant 1                                      | 0.41 |
| <i>Eif5a</i>    |                |                                                                                                              | 0.35 |
| <i>Elavl1</i>   | NM_010485.3    | ELAV (embryonic lethal, abnormal vision, Drosophila)-like 1 (Hu antigen R) (Elavl1)                          | 0.65 |
| <i>Elk3</i>     | NM_205536.1    | ELK3, member of ETS oncogene family (Elk3), transcript variant 2                                             | 0.35 |
| <i>Elmo1</i>    | NM_198093.2    | engulfment and cell motility 1, ced-12 homolog (C. elegans) (Elmo1), transcript variant 2                    | 0.35 |
| <i>Elmo2</i>    | NM_080287.2    | engulfment and cell motility 2, ced-12 homolog (C. elegans) (Elmo2), transcript variant 3                    | 0.63 |
| <i>Elov1</i>    | NM_019422.2    | elongation of very long chain fatty acids (FEN1/Elo2, SUR4/Elo3, yeast)-like 1 (Elov1), transcript variant 2 | 0.60 |
| <i>Elov14</i>   | NM_148941.1    | elongation of very long chain fatty acids (FEN1/Elo2, SUR4/Elo3, yeast)-like 4 (Elov14)                      | 0.51 |
| <i>Elov15</i>   | NM_134255.2    | ELOVL family member 5, elongation of long chain fatty acids (yeast) (Elov15)                                 | 0.52 |
| <i>Elov16</i>   | NM_130450.2    | ELOVL family member 6, elongation of long chain fatty acids (yeast) (Elov16)                                 | 0.21 |
| <i>Emg1</i>     | NM_013536.1    | EMG1 nucleolar protein homolog (S. cerevisiae) (Emg1)                                                        | 0.61 |
| <i>Eno1</i>     | NM_023119.1    | enolase 1, alpha non-neuron (Eno1)                                                                           | 0.46 |
| <i>Entpd4</i>   | NM_026174.2    | ectonucleoside triphosphate diphosphohydrolase 4 (Entpd4)                                                    | 0.52 |
| <i>Epb4.111</i> | XM_487678      |                                                                                                              | 0.65 |
| <i>Epn2</i>     | NM_010148.2    | epsin 2 (Epn2)                                                                                               | 0.44 |
| <i>Eprs</i>     | NM_029735.1    | glutamyl-prolyl-tRNA synthetase (Eprs)                                                                       | 0.53 |
| <i>Ercc1</i>    | NM_007948.1    | excision repair cross-complementing rodent repair deficiency, complementation group 1 (Ercc1)                | 0.62 |
| <i>Ergic1</i>   | NM_026170.3    | endoplasmic reticulum-golgi intermediate compartment (ERGIC) 1 (Ergic1)                                      | 0.36 |
| <i>Ergic2</i>   | NM_026168.3    | ERGIC and golgi 2 (Ergic2), transcript variant 1                                                             | 0.52 |
| <i>Erh</i>      | NM_007951.1    | enhancer of rudimentary homolog (Drosophila) (Erh)                                                           | 0.50 |
| <i>Erlin1</i>   | NM_145502.2    | ER lipid raft associated 1 (Erlin1)                                                                          | 0.58 |
| <i>Ermp1</i>    | NM_001081213.1 | endoplasmic reticulum metalloproteinase 1 (Ermp1)                                                            | 0.26 |
| <i>Erp29</i>    | NM_026129.2    | endoplasmic reticulum protein 29 (Erp29)                                                                     | 0.64 |
| <i>Errfi1</i>   | NM_133753.1    | ERBB receptor feedback inhibitor 1 (Errfi1)                                                                  | 0.64 |
| <i>Esco2</i>    | NM_028039.1    | establishment of cohesion 1 homolog 2 (S. cerevisiae) (Esco2)                                                | 0.32 |
| <i>Esp1</i>     | NM_001014976.1 | extra spindle poles-like 1 (S. cerevisiae) (Esp1)                                                            | 0.64 |
| <i>Esrra</i>    | NM_007953.2    | estrogen related receptor, alpha (Esrra)                                                                     | 0.66 |

|                      |                |                                                                                                    |      |
|----------------------|----------------|----------------------------------------------------------------------------------------------------|------|
| <i>Esrrb</i>         | NM_011934.3    | estrogen related receptor, beta ( <i>Esrrb</i> )                                                   | 0.52 |
| <i>Etaa1</i>         | NM_026576.2    | Ewing's tumor-associated antigen 1 ( <i>Etaa1</i> )                                                | 0.61 |
| <i>Etf1</i>          | NM_144866.3    | eukaryotic translation termination factor 1 ( <i>Etf1</i> )                                        | 0.56 |
| <i>Ets1</i>          | NM_001038642.1 | E26 avian leukemia oncogene 1, 5' domain ( <i>Ets1</i> ), transcript variant 2                     | 0.54 |
| <i>Ets2</i>          | NM_011809.2    | E26 avian leukemia oncogene 2, 3' domain ( <i>Ets2</i> )                                           | 0.38 |
| <i>Etv1</i>          | NM_007960.3    | ets variant gene 1 ( <i>Etv1</i> )                                                                 | 0.29 |
| <i>Etv4</i>          | NM_008815.2    | ets variant gene 4 (E1A enhancer binding protein, E1AF) ( <i>Etv4</i> )                            | 0.33 |
| <i>Etv5</i>          | NM_023794.2    | ets variant gene 5 ( <i>Etv5</i> )                                                                 | 0.20 |
| <i>Exosc1</i>        | NM_025644.3    | exosome component 1 ( <i>Exosc1</i> )                                                              | 0.52 |
| <i>Exosc2</i>        | NM_144886.1    | exosome component 2 ( <i>Exosc2</i> )                                                              | 0.63 |
| <i>Exosc8</i>        | NM_027148.2    | exosome component 8 ( <i>Exosc8</i> )                                                              | 0.52 |
| <i>Ext1</i>          | NM_010162.2    | exostoses (multiple) 1 ( <i>Ext1</i> )                                                             | 0.57 |
| <i>Ezh2</i>          | NM_007971.1    | enhancer of zeste homolog 2 ( <i>Drosophila</i> ) ( <i>Ezh2</i> )                                  | 0.27 |
| <i>F2r</i>           | NM_010169.3    | coagulation factor II (thrombin) receptor ( <i>F2r</i> )                                           | 0.24 |
| <i>F630043A04Rik</i> | NM_198605.1    | RIKEN cDNA F630043A04 gene ( <i>F630043A04Rik</i> )                                                | 0.56 |
| <i>Faah</i>          | NM_010173.3    | fatty acid amide hydrolase ( <i>Faah</i> )                                                         | 0.60 |
| <i>Fabp5</i>         | NM_010634.2    | fatty acid binding protein 5, epidermal ( <i>Fabp5</i> )                                           | 0.29 |
| <i>Fabp7</i>         | NM_021272.2    |                                                                                                    | 0.45 |
| <i>Fam101a</i>       | NM_028443.2    | family with sequence similarity 101, member A ( <i>Fam101a</i> )                                   | 0.51 |
| <i>Fam108a</i>       | NM_145421.1    | family with sequence similarity 108, member A ( <i>Fam108a</i> )                                   | 0.63 |
| <i>Fam108b</i>       | NM_146096.3    | family with sequence similarity 108, member B ( <i>Fam108b</i> )                                   | 0.66 |
| <i>Fam120a</i>       | NM_001033268.2 | family with sequence similarity 120, member A ( <i>Fam120a</i> )                                   | 0.48 |
| <i>Fam131a</i>       | NM_133778.2    | family with sequence similarity 131, member A ( <i>Fam131a</i> )                                   | 0.48 |
| <i>Fam171a1</i>      | NM_001081161.1 | family with sequence similarity 171, member A1 ( <i>Fam171a1</i> )                                 | 0.50 |
| <i>Fam171b</i>       | NM_175514.2    | family with sequence similarity 171, member B ( <i>Fam171b</i> )                                   | 0.37 |
| <i>Fam173a</i>       | NM_145410.3    | family with sequence similarity 173, member A ( <i>Fam173a</i> )                                   | 0.58 |
| <i>Fam84a</i>        | NM_029007.2    | family with sequence similarity 84, member A ( <i>Fam84a</i> )                                     | 0.33 |
| <i>Fancd2</i>        | XM_132796.4    |                                                                                                    | 0.66 |
| <i>Fance</i>         | XM_986338.2    | PREDICTED: Fanconi anemia, complementation group E ( <i>Fance</i> )                                | 0.59 |
| <i>Farsb</i>         | NM_011811.2    | phenylalanyl-tRNA synthetase, beta subunit ( <i>Farsb</i> )                                        | 0.46 |
| <i>Fblim1</i>        | NM_133754.3    | filamin binding LIM protein 1 ( <i>Fblim1</i> )                                                    | 0.54 |
| <i>Fbln1</i>         | NM_010180      |                                                                                                    | 0.55 |
| <i>Fbln2</i>         | NM_001081437.1 | fibulin 2 ( <i>Fbln2</i> ), transcript variant 2                                                   | 0.13 |
| <i>Fbn1</i>          | NM_007993      |                                                                                                    | 0.46 |
| <i>Fbxl10</i>        | NM_001005866.1 | F-box and leucine-rich repeat protein 10 ( <i>Fbxl10</i> ), transcript variant 3                   | 0.50 |
| <i>Fbxl14</i>        | NM_133940.1    | F-box and leucine-rich repeat protein 14 ( <i>Fbxl14</i> )                                         | 0.66 |
| <i>Fchsd2</i>        | NM_199012.1    | FCH and double SH3 domains 2 ( <i>Fchsd2</i> )                                                     | 0.56 |
| <i>Fdps</i>          | NM_134469.3    | farnesyl diphosphate synthetase ( <i>Fdps</i> )                                                    | 0.20 |
| <i>Fen1</i>          | NM_007999.3    | flap structure specific endonuclease 1 ( <i>Fen1</i> )                                             | 0.34 |
| <i>Fgf1</i>          | NM_010197.3    | fibroblast growth factor 1 ( <i>Fgf1</i> )                                                         | 0.49 |
| <i>Fgf22</i>         | NM_023304.1    | fibroblast growth factor 22 ( <i>Fgf22</i> )                                                       | 0.60 |
| <i>Fh1</i>           | NM_010209.1    | fumarate hydratase 1 ( <i>Fh1</i> )                                                                | 0.45 |
| <i>Fibp</i>          | NM_021438.2    | fibroblast growth factor (acidic) intracellular binding protein ( <i>Fibp</i> )                    | 0.54 |
| <i>Figl1</i>         | NM_021891.2    | fidgetin-like 1 ( <i>Figl1</i> )                                                                   | 0.25 |
| <i>Fkbp11</i>        | NM_024169.3    | FK506 binding protein 11 ( <i>Fkbp11</i> )                                                         | 0.41 |
| <i>Fkbp1a</i>        | NM_008019.2    | FK506 binding protein 1a ( <i>Fkbp1a</i> )                                                         | 0.39 |
| <i>Fkbp4</i>         | NM_010219.3    | FK506 binding protein 4 ( <i>Fkbp4</i> )                                                           | 0.66 |
| <i>Fkbp5</i>         | NM_010220.2    | FK506 binding protein 5 ( <i>Fkbp5</i> )                                                           | 0.61 |
| <i>Fmn12</i>         | NM_172409.2    | formin-like 2 ( <i>Fmn12</i> )                                                                     | 0.35 |
| <i>Fnbp11</i>        | NM_153118.1    | formin binding protein 1-like ( <i>Fnbp11</i> )                                                    | 0.55 |
| <i>Fndc3b</i>        | NM_173182.1    | fibronectin type III domain containing 3B ( <i>Fndc3b</i> )                                        | 0.38 |
| <i>Foxk2</i>         | NM_001080932.1 | forkhead box K2 ( <i>Foxk2</i> )                                                                   | 0.62 |
| <i>Foxm1</i>         | NM_008021.4    | forkhead box M1 ( <i>Foxm1</i> )                                                                   | 0.43 |
| <i>Foxred1</i>       | NM_172291.1    | FAD-dependent oxidoreductase domain containing 1 ( <i>Foxred1</i> )                                | 0.66 |
| <i>Fpgs</i>          | NM_010236.1    | folylpolyglutamyl synthetase ( <i>Fpgs</i> )                                                       | 0.66 |
| <i>Frm4a</i>         | NM_172475      |                                                                                                    | 0.45 |
| <i>Fscn1</i>         | NM_007984.2    | fascin homolog 1, actin bundling protein ( <i>Strongylocentrotus purpuratus</i> ) ( <i>Fscn1</i> ) | 0.22 |
| <i>Fubp3</i>         | NM_001033389.2 | far upstream element (FUSE) binding protein 3 ( <i>Fubp3</i> )                                     | 0.61 |
| <i>Fus</i>           | NM_139149.1    |                                                                                                    | 0.48 |
| <i>Fut8</i>          | NM_016893.2    | fucosyltransferase 8 ( <i>Fut8</i> )                                                               | 0.39 |
| <i>Fxc1</i>          | NM_019502.2    | fractured callus expressed transcript 1 ( <i>Fxc1</i> )                                            | 0.40 |
| <i>Fxn</i>           | NM_008044.1    | frataxin ( <i>Fxn</i> )                                                                            | 0.46 |
| <i>Fxyd6</i>         | NM_022004.6    | FXYD domain-containing ion transport regulator 6 ( <i>Fxyd6</i> )                                  | 0.48 |
| <i>Fyn</i>           | NM_008054.1    | <i>Fyn</i> proto-oncogene ( <i>Fyn</i> )                                                           | 0.56 |
| <i>Fzd1</i>          | NM_021457.2    | frizzled homolog 1 ( <i>Drosophila</i> ) ( <i>Fzd1</i> )                                           | 0.53 |
| <i>Fzd5</i>          | NM_022721.3    | frizzled homolog 5 ( <i>Drosophila</i> ) ( <i>Fzd5</i> ), transcript variant 1                     | 0.51 |
| <i>Fzr1</i>          | NM_019757.1    | fizzy/cell division cycle 20 related 1 ( <i>Drosophila</i> ) ( <i>Fzr1</i> )                       | 0.64 |
| <i>G3bp1</i>         | NM_013716.2    | Ras-GTPase-activating protein SH3-domain binding protein 1 ( <i>G3bp1</i> )                        | 0.54 |
| <i>G3bp2</i>         | NM_001080794.1 | GTPase activating protein (SH3 domain) binding protein 2 ( <i>G3bp2</i> ), transcript variant 2    | 0.62 |

|                |                |                                                                                                                   |      |
|----------------|----------------|-------------------------------------------------------------------------------------------------------------------|------|
| <i>Gad1</i>    | NM_008077.4    | glutamic acid decarboxylase 1 ( <i>Gad1</i> )                                                                     | 0.44 |
| <i>Gadd45a</i> | NM_007836.1    | growth arrest and DNA-damage-inducible 45 alpha ( <i>Gadd45a</i> )                                                | 0.52 |
| <i>Galnt1</i>  | NM_013814.2    | UDP-N-acetyl-alpha-D-galactosamine:polypeptide N-acetylgalactosaminyltransferase 1 ( <i>Galnt1</i> )              | 0.56 |
| <i>Galnt10</i> | NM_134189.2    | UDP-N-acetyl-alpha-D-galactosamine:polypeptide N-acetylgalactosaminyltransferase 10 ( <i>Galnt10</i> )            | 0.49 |
| <i>Galnt2</i>  | NM_139272.2    | UDP-N-acetyl-alpha-D-galactosamine:polypeptide N-acetylgalactosaminyltransferase 2 ( <i>Galnt2</i> )              | 0.60 |
| <i>Gamt</i>    | NM_010255.1    | guanidinoacetate methyltransferase ( <i>Gamt</i> )                                                                | 0.61 |
| <i>Ganab</i>   | NM_008060.1    | alpha glucosidase 2 alpha neutral subunit ( <i>Ganab</i> )                                                        | 0.54 |
| <i>Gap43</i>   | NM_008083.2    | growth associated protein 43 ( <i>Gap43</i> )                                                                     | 0.43 |
| <i>Gapdh</i>   | NM_008084.2    | glyceraldehyde-3-phosphate dehydrogenase ( <i>Gapdh</i> )                                                         | 0.60 |
| <i>Gars</i>    | NM_180678.3    | glycyl-tRNA synthetase ( <i>Gars</i> )                                                                            | 0.46 |
| <i>Gart</i>    | NM_010256.2    | phosphoribosylglycinamide formyltransferase ( <i>Gart</i> )                                                       | 0.60 |
| <i>Gas2l3</i>  | NM_001079876.1 | growth arrest-specific 2 like 3 ( <i>Gas2l3</i> ), transcript variant 2                                           | 0.27 |
| <i>Gas7</i>    | NM_008088.1    | growth arrest specific 7 ( <i>Gas7</i> )                                                                          | 0.59 |
| <i>Gatad1</i>  | NM_026033.1    | GATA zinc finger domain containing 1 ( <i>Gatad1</i> )                                                            | 0.59 |
| <i>Gcap14</i>  | NM_028407.3    | granule cell antiserum positive 14 ( <i>Gcap14</i> ), transcript variant 2                                        | 0.35 |
| <i>Gcat</i>    | NM_013847      |                                                                                                                   | 0.65 |
| <i>Gch1</i>    | NM_008102.3    | GTP cyclohydrolase 1 ( <i>Gch1</i> )                                                                              | 0.63 |
| <i>Gcs1</i>    | NM_020619.2    | glucosidase 1 ( <i>Gcs1</i> )                                                                                     | 0.46 |
| <i>Gdf15</i>   | NM_011819.1    | growth differentiation factor 15 ( <i>Gdf15</i> )                                                                 | 0.30 |
| <i>Gdpd1</i>   | NM_025638.1    | glycerophosphodiester phosphodiesterase domain containing 1 ( <i>Gdpd1</i> )                                      | 0.56 |
| <i>Gemin4</i>  | NM_177367.2    | gem (nuclear organelle) associated protein 4 ( <i>Gemin4</i> )                                                    | 0.53 |
| <i>Gfm1</i>    | NM_138591.1    | G elongation factor, mitochondrial 1 ( <i>Gfm1</i> )                                                              | 0.46 |
| <i>Gins2</i>   | NM_178856.1    | GINS complex subunit 2 ( <i>Psf2</i> homolog) ( <i>Gins2</i> )                                                    | 0.53 |
| <i>Gipc1</i>   | NM_018771.3    | GIPC PDZ domain containing family, member 1 ( <i>Gipc1</i> )                                                      | 0.54 |
| <i>Glb1</i>    | NM_009752.1    | galactosidase, beta 1 ( <i>Glb1</i> )                                                                             | 0.44 |
| <i>Gldc</i>    | NM_138595.1    | glycine decarboxylase ( <i>Gldc</i> )                                                                             | 0.46 |
| <i>Glg1</i>    | NM_009149      |                                                                                                                   | 0.61 |
| <i>Glrx5</i>   | NM_028419.2    | glutaredoxin 5 homolog ( <i>S. cerevisiae</i> ) ( <i>Glrx5</i> )                                                  | 0.58 |
| <i>Glt25d1</i> | NM_146211.2    | glycosyltransferase 25 domain containing 1 ( <i>Glt25d1</i> )                                                     | 0.39 |
| <i>Glt25d2</i> | NM_177756.3    | glycosyltransferase 25 domain containing 2 ( <i>Glt25d2</i> )                                                     | 0.59 |
| <i>Gm444</i>   | XM_144253.6    | PREDICTED: gene model 444, (NCBI) ( <i>Gm444</i> )                                                                | 0.53 |
| <i>Gm561</i>   | NM_001033297.2 | gene model 561, (NCBI) ( <i>Gm561</i> )                                                                           | 0.45 |
| <i>Gm949</i>   | NM_001033446.2 | gene model 949, (NCBI) ( <i>Gm949</i> )                                                                           | 0.65 |
| <i>Gmnds</i>   | NM_146041.2    | GDP-mannose 4, 6-dehydratase ( <i>Gmnds</i> )                                                                     | 0.62 |
| <i>Gna11</i>   | NM_010301.3    | guanine nucleotide binding protein, alpha 11 ( <i>Gna11</i> )                                                     | 0.66 |
| <i>Gnai1</i>   | NM_010305.1    | guanine nucleotide binding protein (G protein), alpha inhibiting 1 ( <i>Gnai1</i> )                               | 0.38 |
| <i>Gnb1</i>    | NM_008142.3    | guanine nucleotide binding protein (G protein), beta 1 ( <i>Gnb1</i> )                                            | 0.55 |
| <i>Gnb4</i>    | NM_013531.3    | guanine nucleotide binding protein (G protein), beta 4 ( <i>Gnb4</i> )                                            | 0.51 |
| <i>Gng10</i>   | NM_025277.3    | guanine nucleotide binding protein (G protein), gamma 10 ( <i>Gng10</i> )                                         | 0.66 |
| <i>Gng12</i>   | AK005561       |                                                                                                                   | 0.46 |
| <i>Gng2</i>    | NM_001038637.1 | guanine nucleotide binding protein (G protein), gamma 2 ( <i>Gng2</i> ), transcript variant 2                     | 0.60 |
| <i>Gnl3</i>    | NM_178846.1    | guanine nucleotide binding protein-like 3 (nucleolar) ( <i>Gnl3</i> ), transcript variant 2                       | 0.43 |
| <i>Gnpda1</i>  | NM_011937.1    | glucosamine-6-phosphate deaminase 1 ( <i>Gnpda1</i> )                                                             | 0.51 |
| <i>Golim4</i>  | NM_175193.5    | golgi integral membrane protein 4 ( <i>Golim4</i> )                                                               | 0.54 |
| <i>Golm1</i>   | NM_027307.4    | golgi membrane protein 1 ( <i>Golm1</i> ), transcript variant 1                                                   | 0.15 |
| <i>Gorasp2</i> | NM_027352.3    | golgi reassembly stacking protein 2 ( <i>Gorasp2</i> )                                                            | 0.47 |
| <i>Got2</i>    | NM_010325.2    | glutamate oxaloacetate transaminase 2, mitochondrial ( <i>Got2</i> ), nuclear gene encoding mitochondrial protein | 0.48 |
| <i>Gpc1</i>    | NM_016696.3    | glypican 1 ( <i>Gpc1</i> )                                                                                        | 0.60 |
| <i>Gpd1</i>    | NM_010271.2    | glycerol-3-phosphate dehydrogenase 1 (soluble) ( <i>Gpd1</i> )                                                    | 0.58 |
| <i>Gpd2</i>    | NM_010274.2    | glycerol phosphate dehydrogenase 2, mitochondrial ( <i>Gpd2</i> ), nuclear gene encoding mitochondrial protein    | 0.58 |
| <i>Gphn</i>    | NM_172952.2    | gephyrin ( <i>Gphn</i> )                                                                                          | 0.64 |
| <i>Gpi1</i>    | NM_008155.2    | glucose phosphate isomerase 1 ( <i>Gpi1</i> )                                                                     | 0.60 |
| <i>Gpnmb</i>   | NM_053110.3    | glycoprotein (transmembrane) nmb ( <i>Gpnmb</i> )                                                                 | 0.44 |
| <i>Gpr125</i>  | XM_132089.7    | PREDICTED: G protein-coupled receptor 125, transcript variant 1 ( <i>Gpr125</i> )                                 | 0.58 |
| <i>Gps1</i>    | NM_145370.1    | G protein pathway suppressor 1 ( <i>Gps1</i> )                                                                    | 0.61 |
| <i>Gpsm1</i>   | NM_153410.4    | G-protein signalling modulator 1 (AGS3-like, <i>C. elegans</i> ) ( <i>Gpsm1</i> )                                 | 0.62 |
| <i>Gpx3</i>    | NM_008161.2    | glutathione peroxidase 3 ( <i>Gpx3</i> ), transcript variant 2                                                    | 0.59 |
| <i>Grcc10</i>  | NM_013535.1    | gene rich cluster, C10 gene ( <i>Grcc10</i> )                                                                     | 0.62 |
| <i>Gria2</i>   | NM_001039195.1 | glutamate receptor, ionotropic, AMPA2 (alpha 2) ( <i>Gria2</i> ), transcript variant 1                            | 0.55 |
| <i>Grip1</i>   | NM_028736      |                                                                                                                   | 0.58 |
| <i>Grm5</i>    | NM_001081414.1 | glutamate receptor, metabotropic 5 ( <i>Grm5</i> )                                                                | 0.13 |
| <i>Grwd1</i>   | NM_153419.1    | glutamate-rich WD repeat containing 1 ( <i>Grwd1</i> )                                                            | 0.59 |
| <i>Gsg2</i>    | NM_010353.1    | germ cell-specific gene 2 ( <i>Gsg2</i> )                                                                         | 0.54 |
| <i>Gspt1</i>   | NM_146066.1    | G1 to S phase transition 1 ( <i>Gspt1</i> )                                                                       | 0.47 |

|                  |                |                                                                                          |      |
|------------------|----------------|------------------------------------------------------------------------------------------|------|
| <i>Gstp1</i>     | NM_013541.1    | glutathione S-transferase, pi 1 ( <i>Gstp1</i> )                                         | 0.61 |
| <i>Gtf2e2</i>    | NM_026584.2    | general transcription factor II E, polypeptide 2 (beta subunit) ( <i>Gtf2e2</i> )        | 0.54 |
| <i>Gtf2f2</i>    | NM_026816.3    | general transcription factor IIF, polypeptide 2 ( <i>Gtf2f2</i> )                        | 0.56 |
| <i>Gtf2h2</i>    | NM_022011.3    | general transcription factor II H, polypeptide 2 ( <i>Gtf2h2</i> )                       | 0.64 |
| <i>Gtf3a</i>     | NM_025652.1    | general transcription factor III A ( <i>Gtf3a</i> )                                      | 0.63 |
| <i>Gtpbp3</i>    | NM_032544.3    | GTP binding protein 3 ( <i>Gtpbp3</i> ), nuclear gene encoding mitochondrial protein     | 0.42 |
| <i>Gtpbp4</i>    | NM_027000.4    | GTP binding protein 4 ( <i>Gtpbp4</i> )                                                  | 0.50 |
| <i>Gtse1</i>     | NM_013882.1    | G two S phase expressed protein 1 ( <i>Gtse1</i> )                                       | 0.57 |
| <i>Gucy1a3</i>   | NM_021896.4    | guanylate cyclase 1, soluble, alpha 3 ( <i>Gucy1a3</i> )                                 | 0.39 |
| <i>Gusb</i>      | NM_010368.1    | glucuronidase, beta ( <i>Gusb</i> )                                                      | 0.54 |
| <i>H1fx</i>      | NM_198622.1    | H1 histone family, member X ( <i>H1fx</i> )                                              | 0.53 |
| <i>H2afx</i>     | NM_010436.2    | H2A histone family, member X ( <i>H2afx</i> )                                            | 0.26 |
| <i>H2afz</i>     | NM_016750.1    | H2A histone family, member Z ( <i>H2afz</i> )                                            | 0.24 |
| <i>Hat1</i>      | NM_026115.3    | histone aminotransferase 1 ( <i>Hat1</i> )                                               | 0.44 |
| <i>Hbegf</i>     | NM_010415.1    | heparin-binding EGF-like growth factor ( <i>Hbegf</i> )                                  | 0.36 |
| <i>Hccs</i>      | NM_008222.2    | holocytochrome c synthetase ( <i>Hccs</i> )                                              | 0.63 |
| <i>Hdac2</i>     | NM_008229.1    |                                                                                          | 0.45 |
| <i>Heatr1</i>    | NM_144835.4    | HEAT repeat containing 1 ( <i>Heatr1</i> )                                               | 0.53 |
| <i>Heatr3</i>    | NM_172757.3    | HEAT repeat containing 3 ( <i>Heatr3</i> )                                               | 0.66 |
| <i>Hectd1</i>    | XM_974905.2    | PREDICTED: HECT domain containing 1 ( <i>Hectd1</i> )                                    | 0.63 |
| <i>Hectd2</i>    | NM_172637.1    | HECT domain containing 2 ( <i>Hectd2</i> )                                               | 0.22 |
| <i>Hes1</i>      | NM_008235.2    | hairy and enhancer of split 1 ( <i>Drosophila</i> ) ( <i>Hes1</i> )                      | 0.52 |
| <i>Hes6</i>      | NM_019479.2    | hairy and enhancer of split 6 ( <i>Drosophila</i> ) ( <i>Hes6</i> )                      | 0.58 |
| <i>Hip1</i>      | NM_146001.1    | huntingtin interacting protein 1 ( <i>Hip1</i> )                                         | 0.10 |
| <i>HIP-1</i>     | AK087586       |                                                                                          | 0.52 |
| <i>Hip2</i>      | NM_016786.2    |                                                                                          | 0.62 |
| <i>Hirip3</i>    | NM_172746.2    | HIRA interacting protein 3 ( <i>Hirip3</i> )                                             | 0.51 |
| <i>Hist1h2ad</i> | NM_178188.3    | histone cluster 1, H2ad ( <i>Hist1h2ad</i> )                                             | 0.18 |
| <i>Hist1h2af</i> | NM_175661.1    | histone cluster 1, H2af ( <i>Hist1h2af</i> )                                             | 0.29 |
| <i>Hist1h2ag</i> | NM_178186.2    | histone cluster 1, H2ag ( <i>Hist1h2ag</i> )                                             | 0.25 |
| <i>Hist1h2ah</i> | NM_175659.1    | histone cluster 1, H2ah ( <i>Hist1h2ah</i> )                                             | 0.12 |
| <i>Hist1h2ai</i> | NM_178182.1    | histone cluster 1, H2ai ( <i>Hist1h2ai</i> )                                             | 0.23 |
| <i>Hist1h2ak</i> | NM_178183.1    | histone cluster 1, H2ak ( <i>Hist1h2ak</i> )                                             | 0.14 |
| <i>Hist1h2an</i> | NM_178184.1    | histone cluster 1, H2an ( <i>Hist1h2an</i> )                                             | 0.08 |
| <i>Hist1h2ao</i> | NM_178185.1    | histone cluster 1, H2ao ( <i>Hist1h2ao</i> )                                             | 0.08 |
| <i>Hist2h2ab</i> | NM_178213.3    | histone cluster 2, H2ab ( <i>Hist2h2ab</i> )                                             | 0.32 |
| <i>Hist2h2ac</i> | NM_175662.1    | histone cluster 2, H2ac ( <i>Hist2h2ac</i> )                                             | 0.21 |
| <i>Hmga1</i>     | NM_016660.2    | high mobility group AT-hook 1 ( <i>Hmga1</i> ), transcript variant 1                     | 0.36 |
| <i>Hmgb2</i>     | NM_008252.2    | high mobility group box 2 ( <i>Hmgb2</i> )                                               | 0.31 |
| <i>Hmgcl</i>     | NM_008254.1    | 3-hydroxy-3-methylglutaryl-Coenzyme A lyase ( <i>Hmgcl</i> )                             | 0.57 |
| <i>Hmgcr</i>     | NM_008255.1    | 3-hydroxy-3-methylglutaryl-Coenzyme A reductase ( <i>Hmgcr</i> )                         | 0.48 |
| <i>Hmgn2</i>     | NM_016957.3    | high mobility group nucleosomal binding domain 2 ( <i>Hmgn2</i> )                        | 0.56 |
| <i>Hn1</i>       | NM_008258.1    | hematological and neurological expressed sequence 1 ( <i>Hn1</i> )                       | 0.29 |
| <i>Hn1l</i>      | NM_198937.2    | hematological and neurological expressed 1-like ( <i>Hn1l</i> )                          | 0.54 |
| <i>Hnrnpa2b1</i> | NM_182650.3    | heterogeneous nuclear ribonucleoprotein A2/B1 ( <i>Hnrnpa2b1</i> ), transcript variant 2 | 0.37 |
| <i>Hnrnpab</i>   | NM_001048061.1 | heterogeneous nuclear ribonucleoprotein A/B ( <i>Hnrnpab</i> ), transcript variant 1     | 0.38 |
| <i>Hnrmpf</i>    | NM_133834.1    | heterogeneous nuclear ribonucleoprotein F ( <i>Hnrmpf</i> )                              | 0.64 |
| <i>HnrmpH1</i>   | NM_021510.2    | heterogeneous nuclear ribonucleoprotein H1 ( <i>HnrmpH1</i> )                            | 0.63 |
| <i>Hnrmpk</i>    | NM_025279.2    | heterogeneous nuclear ribonucleoprotein K ( <i>Hnrmpk</i> )                              | 0.56 |
| <i>Hnrpa1</i>    | NM_010447      |                                                                                          | 0.34 |
| <i>Hnrpab</i>    | AK013709       |                                                                                          | 0.62 |
| <i>HnrpdI</i>    | NM_016690.4    | heterogeneous nuclear ribonucleoprotein D-like ( <i>HnrpdI</i> )                         | 0.65 |
| <i>Hnrpl</i>     | NM_177301.4    | heterogeneous nuclear ribonucleoprotein L ( <i>Hnrpl</i> )                               | 0.44 |
| <i>HnrplI</i>    | NM_144802.3    | heterogeneous nuclear ribonucleoprotein L-like ( <i>HnrplI</i> )                         | 0.50 |
| <i>Hnrpm</i>     | NM_029804.1    | heterogeneous nuclear ribonucleoprotein M ( <i>Hnrpm</i> )                               | 0.60 |
| <i>Homer1</i>    | NM_152134.1    | homer homolog 1 ( <i>Drosophila</i> ) ( <i>Homer1</i> ), transcript variant d            | 0.47 |
| <i>Homer2</i>    | XM_133550.4    |                                                                                          | 0.47 |
| <i>Hpcal1</i>    | NM_016677.1    | hippocalcin-like 1 ( <i>Hpcal1</i> )                                                     | 0.54 |
| <i>Hprt1</i>     | NM_013556.2    | hypoxanthine guanine phosphoribosyl transferase 1 ( <i>Hprt1</i> )                       | 0.65 |
| <i>Hrmt1I2</i>   | NM_019830.1    |                                                                                          | 0.22 |
| <i>Hs2st1</i>    | NM_011828.2    | heparan sulfate 2-O-sulfotransferase 1 ( <i>Hs2st1</i> )                                 | 0.65 |
| <i>Hs6st2</i>    | NM_015819.3    | heparan sulfate 6-O-sulfotransferase 2 ( <i>Hs6st2</i> ), transcript variant 2           | 0.50 |
| <i>Hsd17b12</i>  | NM_019657.2    | hydroxysteroid (17-beta) dehydrogenase 12 ( <i>Hsd17b12</i> )                            | 0.39 |
| <i>Hsp90ab1</i>  | NM_008302.3    | heat shock protein 90kDa alpha (cytosolic), class B member 1 ( <i>Hsp90ab1</i> )         | 0.56 |
| <i>Hsp90b1</i>   | NM_011631.1    | heat shock protein 90, beta ( <i>Grp94</i> ), member 1 ( <i>Hsp90b1</i> )                | 0.53 |
| <i>Hspa8</i>     | NM_031165.4    | heat shock protein 8 ( <i>Hspa8</i> )                                                    | 0.53 |
| <i>Hspa9</i>     | NM_010481.1    | heat shock protein 9 ( <i>Hspa9</i> )                                                    | 0.57 |
| <i>Hspd1</i>     | NM_010477.3    | heat shock protein 1 (chaperonin) ( <i>Hspd1</i> )                                       | 0.33 |
| <i>Hspe1</i>     | NM_008303.2    | heat shock protein 1 (chaperonin 10) ( <i>Hspe1</i> )                                    | 0.43 |

|                |                |                                                                                              |      |
|----------------|----------------|----------------------------------------------------------------------------------------------|------|
| <i>Htra1</i>   | NM_019564.1    | HtrA serine peptidase 1 (Htra1)                                                              | 0.53 |
| <i>Htra2</i>   | NM_019752.2    | HtrA serine peptidase 2 (Htra2), nuclear gene encoding mitochondrial protein                 | 0.64 |
| <i>Hyal2</i>   | NM_010489.2    | hyaluronoglucosaminidase 2 (Hyal2)                                                           | 0.51 |
| <i>Iars</i>    | NM_172015.1    | isoleucine-tRNA synthetase (Iars)                                                            | 0.49 |
| <i>Iars2</i>   | NM_198653.1    | isoleucine-tRNA synthetase 2, mitochondrial (Iars2)                                          | 0.66 |
| <i>Ibtk</i>    | XM_135030.4    |                                                                                              | 0.65 |
| <i>Ick</i>     | NM_019987.1    | intestinal cell kinase (Ick)                                                                 | 0.61 |
| <i>Ide</i>     | NM_031156.2    | insulin degrading enzyme (Ide)                                                               | 0.42 |
| <i>Idh1</i>    | NM_010497.2    | isocitrate dehydrogenase 1 (NADP+), soluble (Idh1)                                           | 0.61 |
| <i>Idh3a</i>   | NM_029573.2    | isocitrate dehydrogenase 3 (NAD+) alpha (Idh3a), nuclear gene encoding mitochondrial protein | 0.48 |
| <i>Ier3</i>    | NM_133662.2    | immediate early response 3 (Ier3)                                                            | 0.33 |
| <i>Ier5l</i>   | NM_030244.3    | immediate early response 5-like (Ier5l)                                                      | 0.38 |
| <i>Igf2r</i>   | NM_010515.1    | insulin-like growth factor 2 receptor (Igf2r)                                                | 0.54 |
| <i>Igfbp2</i>  | NM_008342.2    | insulin-like growth factor binding protein 2 (Igfbp2)                                        | 0.06 |
| <i>Igfbp3</i>  | NM_008343.2    | insulin-like growth factor binding protein 3 (Igfbp3)                                        | 0.07 |
| <i>Igfbp4</i>  | NM_010517.3    | insulin-like growth factor binding protein 4 (Igfbp4)                                        | 0.04 |
| <i>Ilf2</i>    | NM_026374.3    | interleukin enhancer binding factor 2 (Ilf2)                                                 | 0.59 |
| <i>Immt</i>    | NM_029673.2    | inner membrane protein, mitochondrial (Immt), nuclear gene encoding mitochondrial protein    | 0.43 |
| <i>Imp3</i>    | NM_133976.1    | IMP3, U3 small nucleolar ribonucleoprotein, homolog (yeast) (Imp3)                           | 0.46 |
| <i>Impa2</i>   | NM_053261.2    | inositol (myo)-1(or 4)-monophosphatase 2 (Impa2)                                             | 0.56 |
| <i>Impad1</i>  | NM_177730.3    | inositol monophosphatase domain containing 1 (Impad1)                                        | 0.42 |
| <i>Impdh2</i>  | NM_011830      |                                                                                              | 0.49 |
| <i>Incenp</i>  | NM_016692.1    | inner centromere protein (Incenp)                                                            | 0.37 |
| <i>Inpp5f</i>  | NM_178641.3    | inositol polyphosphate-5-phosphatase F (Inpp5f)                                              | 0.52 |
| <i>Insig1</i>  | NM_153526.2    | insulin induced gene 1 (Insig1)                                                              | 0.26 |
| <i>Insm1</i>   | NM_016889.2    | insulinoma-associated 1 (Insm1)                                                              | 0.66 |
| <i>Ints7</i>   | NM_178632.4    | integrator complex subunit 7 (Ints7)                                                         | 0.52 |
| <i>Ipo5</i>    | NM_023579.4    | importin 5 (Ipo5)                                                                            | 0.48 |
| <i>Ipo9</i>    | NM_153774.1    | importin 9 (Ipo9)                                                                            | 0.62 |
| <i>Iqgap1</i>  | NM_016721      |                                                                                              | 0.53 |
| <i>Iqgap3</i>  | NM_001033484.1 | IQ motif containing GTPase activating protein 3 (Iqgap3)                                     | 0.49 |
| <i>Isca1</i>   | NM_026921.2    | iron-sulfur cluster assembly 1 homolog (S. cerevisiae) (Isca1)                               | 0.57 |
| <i>Isg20l2</i> | NM_177663.2    | interferon stimulated exonuclease gene 20-like 2 (Isg20l2)                                   | 0.63 |
| <i>Itgav</i>   | NM_008402.1    | integrin alpha V (Itgav)                                                                     | 0.57 |
| <i>Itgb1</i>   | NM_010578.1    | integrin beta 1 (fibronectin receptor beta) (Itgb1)                                          | 0.62 |
| <i>Itp2</i>    | NM_019923.3    | inositol 1,4,5-triphosphate receptor 2 (Itp2), transcript variant 1                          | 0.33 |
| <i>Jagn1</i>   | NM_026365.2    | jagunal homolog 1 (Drosophila) (Jagn1)                                                       | 0.65 |
| <i>Jam2</i>    | NM_023844.2    | junction adhesion molecule 2 (Jam2)                                                          | 0.60 |
| <i>Jmjd6</i>   | NM_033398.2    | jumonji domain containing 6 (Jmjd6)                                                          | 0.52 |
| <i>Josd2</i>   | NM_025368.3    | Josephin domain containing 2 (Josd2)                                                         | 0.60 |
| <i>Kars</i>    | NM_053092.1    | lysyl-tRNA synthetase (Kars)                                                                 | 0.57 |
| <i>Kbtbd2</i>  | NM_145958.1    | kelch repeat and BTB (POZ) domain containing 2 (Kbtbd2)                                      | 0.63 |
| <i>Kcnc1</i>   | NM_008421.2    | potassium voltage gated channel, Shaw-related subfamily, member 1 (Kcnc1)                    | 0.37 |
| <i>Kcnc4</i>   | NM_145922.2    | potassium voltage gated channel, Shaw-related subfamily, member 4 (Kcnc4)                    | 0.35 |
| <i>Kcnd2</i>   | NM_019697.3    | potassium voltage-gated channel, Shal-related family, member 2 (Kcnd2)                       | 0.54 |
| <i>Kcnip3</i>  | NM_019789.2    | Kv channel interacting protein 3, calsenilin (Kcnip3)                                        | 0.36 |
| <i>Kcnk13</i>  | NM_146037.1    | potassium channel, subfamily K, member 13 (Kcnk13)                                           | 0.61 |
| <i>Kctd12</i>  | NM_177715.4    | potassium channel tetramerisation domain containing 12 (Kctd12)                              | 0.33 |
| <i>Kdelc1</i>  | NM_023645.2    | KDEL (Lys-Asp-Glu-Leu) containing 1 (Kdelc1)                                                 | 0.63 |
| <i>Kdelr2</i>  | NM_025841.3    | KDEL (Lys-Asp-Glu-Leu) endoplasmic reticulum protein retention receptor 2 (Kdelr2)           | 0.45 |
| <i>Khdrbs1</i> | NM_011317.3    | KH domain containing, RNA binding, signal transduction associated 1 (Khdrbs1)                | 0.51 |
| <i>Kif11</i>   | NM_010615.1    | kinesin family member 11 (Kif11)                                                             | 0.39 |
| <i>Kif15</i>   | NM_010620.1    | kinesin family member 15 (Kif15)                                                             | 0.36 |
| <i>Kif18a</i>  | NM_139303.1    | kinesin family member 18A (Kif18a)                                                           | 0.34 |
| <i>Kif20b</i>  | NM_183046.1    | kinesin family member 20B (Kif20b)                                                           | 0.32 |
| <i>Kif22</i>   | NM_145588.1    | kinesin family member 22 (Kif22)                                                             | 0.17 |
| <i>Kif23</i>   | NM_024245      |                                                                                              | 0.10 |
| <i>Kif2a</i>   | NM_008442.1    | kinesin family member 2A (Kif2a)                                                             | 0.64 |
| <i>Kif2c</i>   | NM_134471.3    | kinesin family member 2C (Kif2c)                                                             | 0.26 |
| <i>Kif3c</i>   | NM_008445.2    | kinesin family member 3C (Kif3c)                                                             | 0.33 |
| <i>Kif4</i>    | NM_008446.1    | kinesin family member 4 (Kif4)                                                               | 0.32 |
| <i>Kifc1</i>   | NM_016761.1    |                                                                                              | 0.51 |
| <i>Kirrel3</i> | NM_026324.2    | kin of IRRE like 3 (Drosophila) (Kirrel3)                                                    | 0.42 |
| <i>Kitl</i>    | NM_013598.1    | kit ligand (Kitl)                                                                            | 0.58 |
| <i>Klf6</i>    | NM_011803.2    | Kruppel-like factor 6 (Klf6)                                                                 | 0.63 |

|                     |                |                                                                                                                           |      |
|---------------------|----------------|---------------------------------------------------------------------------------------------------------------------------|------|
| <i>Klf7</i>         | NM_033563      |                                                                                                                           | 0.65 |
| <i>Klhdc2</i>       | NM_027117.1    | kelch domain containing 2 ( <i>Klhdc2</i> )                                                                               | 0.60 |
| <i>Kntc1</i>        | NM_001042421.1 | kinetochore associated 1 ( <i>Kntc1</i> )                                                                                 | 0.36 |
| <i>Kpna1</i>        | NM_008465.4    | karyopherin (importin) alpha 1 ( <i>Kpna1</i> )                                                                           | 0.57 |
| <i>Kpna2</i>        | NM_010655.3    | karyopherin (importin) alpha 2 ( <i>Kpna2</i> )                                                                           | 0.55 |
| <i>Kpnb1</i>        | NM_008379.3    | karyopherin (importin) beta 1 ( <i>Kpnb1</i> )                                                                            | 0.57 |
| <i>Kras</i>         | NM_021284.4    | v-Ki-ras2 Kirsten rat sarcoma viral oncogene homolog ( <i>Kras</i> )                                                      | 0.60 |
| <i>Krtcap2</i>      | NM_025327.2    | keratinocyte associated protein 2 ( <i>Krtcap2</i> )                                                                      | 0.57 |
| <i>Kti12</i>        | NM_029571.2    | KTI12 homolog, chromatin associated ( <i>S. cerevisiae</i> ) ( <i>Kti12</i> )                                             | 0.61 |
| <i>L2hgdh</i>       | NM_145443.1    | L-2-hydroxyglutarate dehydrogenase ( <i>L2hgdh</i> ), nuclear gene encoding mitochondrial protein                         | 0.64 |
| <i>Lama5</i>        | NM_001081171.2 | laminin, alpha 5 ( <i>Lama5</i> )                                                                                         | 0.49 |
| <i>Lamc1</i>        | NM_010683.1    | laminin, gamma 1 ( <i>Lamc1</i> )                                                                                         | 0.48 |
| <i>Lass2</i>        | NM_029789.1    | LAG1 homolog, ceramide synthase 2 ( <i>Lass2</i> )                                                                        | 0.63 |
| <i>Lass5</i>        | NM_028015.2    | LAG1 homolog, ceramide synthase 5 ( <i>Lass5</i> )                                                                        | 0.63 |
| <i>Lbh</i>          | NM_029999.3    | limb-bud and heart ( <i>Lbh</i> )                                                                                         | 0.32 |
| <i>Lbr</i>          | NM_133815      |                                                                                                                           | 0.24 |
| <i>Ldha</i>         | NM_010699.1    | lactate dehydrogenase A ( <i>Ldha</i> )                                                                                   | 0.32 |
| <i>Leo1</i>         | NM_001039522.1 | Leo1, Paf1/RNA polymerase II complex component, homolog ( <i>S. cerevisiae</i> ) ( <i>Leo1</i> )                          | 0.64 |
| <i>Lgals1</i>       | NM_008495.1    |                                                                                                                           | 0.16 |
| <i>Lig1</i>         | NM_010715.2    | ligase I, DNA, ATP-dependent ( <i>Lig1</i> ), transcript variant 2                                                        | 0.29 |
| <i>Lig3</i>         | NM_010716      |                                                                                                                           | 0.64 |
| <i>Lima1</i>        | NM_023063.1    | LIM domain and actin binding 1 ( <i>Lima1</i> )                                                                           | 0.64 |
| <i>Limd1</i>        | NM_013860.1    | LIM domains containing 1 ( <i>Limd1</i> )                                                                                 | 0.62 |
| <i>Lin54</i>        | NM_172714.1    | lin-54 homolog ( <i>C. elegans</i> ) ( <i>Lin54</i> )                                                                     | 0.49 |
| <i>Lip1</i>         | NM_021460.1    |                                                                                                                           | 0.38 |
| <i>Liph</i>         | NM_153404.2    | lipase, member H ( <i>Liph</i> ), transcript variant 2                                                                    | 0.55 |
| <i>Litaf</i>        | NM_019980.1    | LPS-induced TN factor ( <i>Litaf</i> )                                                                                    | 0.42 |
| <i>Lman1</i>        | NM_027400.2    | lectin, mannose-binding, 1 ( <i>Lman1</i> )                                                                               | 0.67 |
| <i>Lmnb1</i>        | NM_010721.1    | lamin B1 ( <i>Lmnb1</i> )                                                                                                 | 0.13 |
| <i>Lmo2</i>         | NM_008505.3    | LIM domain only 2 ( <i>Lmo2</i> )                                                                                         | 0.29 |
| <i>LOC100039346</i> | XM_001472500.1 | PREDICTED: hypothetical protein LOC100039346 (LOC100039346)                                                               | 0.51 |
| <i>LOC100039532</i> | XM_001473099.1 | PREDICTED: similar to ribosomal protein L35a (LOC100039532)                                                               | 0.58 |
| <i>LOC100039571</i> | XM_001473215.1 | PREDICTED: similar to ribosomal protein L23a (LOC100039571)                                                               | 0.34 |
| <i>LOC100039751</i> | XR_031048.1    | PREDICTED: similar to 40S ribosomal protein S12 (LOC100039751), misc RNA.                                                 | 0.61 |
| <i>LOC100039786</i> | XM_001473500.1 | PREDICTED: similar to Ywhaq protein (LOC100039786)                                                                        | 0.66 |
| <i>LOC100040573</i> | XM_001475112.1 | PREDICTED: similar to putative transcription factor ZNF131, transcript variant 1 (LOC100040573)                           | 0.50 |
| <i>LOC100040592</i> | XM_001475189.1 | PREDICTED: similar to Hmgcs1 protein, transcript variant 1 (LOC100040592)                                                 | 0.58 |
| <i>LOC100040605</i> | XM_001475096.1 | PREDICTED: similar to ribosomal protein L13 (LOC100040605)                                                                | 0.48 |
| <i>LOC100041500</i> | XM_001478166.1 | PREDICTED: similar to LSM7 homolog, U6 small nuclear RNA associated (LOC100041500)                                        | 0.61 |
| <i>LOC100041835</i> | XM_001478119.1 | PREDICTED: similar to H+ ATP synthase (LOC100041835)                                                                      | 0.50 |
| <i>LOC100042405</i> | XM_001478555.1 | PREDICTED: similar to high mobility group nucleosomal binding domain 2 (LOC100042405)                                     | 0.34 |
| <i>LOC100042427</i> | XM_001478518.1 | PREDICTED: similar to Glyceraldehyde-3-phosphate dehydrogenase (GAPDH), transcript variant 4 (LOC100042427)               | 0.61 |
| <i>LOC100042777</i> | XM_001478939.1 | PREDICTED: similar to human protein homologous to DROER protein (LOC100042777)                                            | 0.62 |
| <i>LOC100042970</i> | XM_001479207.1 | PREDICTED: similar to Kifc1 protein (LOC100042970)                                                                        | 0.43 |
| <i>LOC100043192</i> | XM_001479822.1 | PREDICTED: similar to ribosomal protein L31 (LOC100043192)                                                                | 0.60 |
| <i>LOC100043209</i> | XM_001480293.1 | PREDICTED: similar to ribosomal protein L15 (LOC100043209)                                                                | 0.56 |
| <i>LOC100043257</i> | XM_001480197.1 | PREDICTED: similar to RNA binding motif protein 3 (LOC100043257)                                                          | 0.44 |
| <i>LOC100043391</i> | XM_001479903.1 | PREDICTED: similar to QM protein (LOC100043391)                                                                           | 0.53 |
| <i>LOC100043527</i> | XM_001480106.1 | PREDICTED: similar to ribosomal protein S28 (LOC100043527)                                                                | 0.58 |
| <i>LOC100043555</i> | XM_001480194.1 | PREDICTED: similar to Aak1 protein (LOC100043555)                                                                         | 0.52 |
| <i>LOC100043671</i> | XM_001481024.1 | PREDICTED: hypothetical protein LOC100043671 (LOC100043671)                                                               | 0.53 |
| <i>LOC100043675</i> | XM_001480621.1 | PREDICTED: similar to Translocase of inner mitochondrial membrane 23 homolog (yeast) (LOC100043675)                       | 0.61 |
| <i>LOC100043822</i> | XM_001481025.1 | PREDICTED: hypothetical protein LOC100043822 (LOC100043822)                                                               | 0.59 |
| <i>LOC100043906</i> | XM_001481214.1 | PREDICTED: similar to nuclear pore-targeting complex component of 58 kDa, transcript variant 1 (LOC100043906)             | 0.37 |
| <i>LOC100044322</i> | XM_001471968.1 | PREDICTED: similar to UDP-glucose ceramide glucosyltransferase-like 1 (LOC100044322)                                      | 0.54 |
| <i>LOC100044468</i> | XM_001472489.1 | PREDICTED: similar to nemo-like kinase (LOC100044468)                                                                     | 0.54 |
| <i>LOC100044696</i> | XM_001473268.1 | PREDICTED: similar to cysteine-rich PAK1 inhibitor (LOC100044696)                                                         | 0.63 |
| <i>LOC100044756</i> | XM_001472989.1 | PREDICTED: similar to PX domain-containing protein kinase-like protein (Modulator of Na,K-ATPase) (MONaKA) (LOC100044756) | 0.66 |



|              |                |                                                                                                                                                         |      |
|--------------|----------------|---------------------------------------------------------------------------------------------------------------------------------------------------------|------|
| LOC100044829 | XM_001472872.1 | PREDICTED: similar to Fibrillarin, transcript variant 1 (LOC100044829)                                                                                  | 0.40 |
| LOC100045040 | XR_031278.1    | PREDICTED: similar to ING1 protein (LOC100045040), misc RNA.                                                                                            | 0.61 |
| LOC100045312 | XM_001473900.1 | PREDICTED: similar to ribosomal protein (LOC100045312)                                                                                                  | 0.44 |
| LOC100045343 | XR_031575.1    | PREDICTED: similar to CDNA sequence BC046404 (LOC100045343), misc RNA.                                                                                  | 0.53 |
| LOC100045542 | XM_001473941.1 | PREDICTED: similar to FERMRhoGEF (Arhgef) and pleckstrin domain protein 1 (LOC100045542)                                                                | 0.64 |
| LOC100045668 | XM_001474718.1 | PREDICTED: similar to Rpl17 protein (LOC100045668)                                                                                                      | 0.64 |
| LOC100045677 | XR_031705.1    | PREDICTED: similar to DNA replication licensing factor MCM3 (DNA polymerase alpha holoenzyme-associated protein P1) (P1-MCM3) (LOC100045677), misc RNA. | 0.49 |
| LOC100045737 | XR_031944.1    | PREDICTED: hypothetical protein LOC100045737 (LOC100045737), misc RNA.                                                                                  | 0.64 |
| LOC100045780 | XM_001475019.1 | PREDICTED: similar to metalloprotease-disintegrin meltrin beta (LOC100045780)                                                                           | 0.18 |
| LOC100045887 | XM_001475106.1 | PREDICTED: similar to PTB-associated splicing factor (LOC100045887)                                                                                     | 0.51 |
| LOC100045967 | XR_032154.1    | PREDICTED: hypothetical protein LOC100045967 (LOC100045967), misc RNA.                                                                                  | 0.44 |
| LOC100045981 | XM_001475298.1 | PREDICTED: similar to synaptotagmin XI (LOC100045981)                                                                                                   | 0.50 |
| LOC100045999 | XM_001475422.1 | PREDICTED: similar to RAN, member RAS oncogene family (LOC100045999)                                                                                    | 0.53 |
| LOC100046320 | XR_032844.1    | PREDICTED: similar to Matrin 3 (LOC100046320), misc RNA.                                                                                                | 0.66 |
| LOC100046343 | XM_001475830.1 | PREDICTED: similar to CCR4-NOT transcription complex, subunit 6 (LOC100046343)                                                                          | 0.50 |
| LOC100046483 | XM_001476285.1 | PREDICTED: similar to casein kinase II, alpha prime subunit (LOC100046483)                                                                              | 0.64 |
| LOC100046518 | XM_001476353.1 | PREDICTED: similar to Gprn1 protein (LOC100046518)                                                                                                      | 0.56 |
| LOC100046650 | XM_001476721.1 | PREDICTED: similar to PRELI domain containing 1 (LOC100046650)                                                                                          | 0.46 |
| LOC100046744 | XM_001475765.1 | PREDICTED: similar to Serine/arginine repetitive matrix protein 2 (LOC100046744)                                                                        | 0.55 |
| LOC100046853 | XM_001476909.1 | PREDICTED: similar to heterogeneous nuclear ribonucleoprotein K (LOC100046853)                                                                          | 0.29 |
| LOC100046855 | XM_001476916.1 | PREDICTED: similar to BKLf (LOC100046855)                                                                                                               | 0.38 |
| LOC100046895 | XM_001477026.1 | PREDICTED: similar to Quaking protein (LOC100046895)                                                                                                    | 0.48 |
| LOC100047155 | XM_001477537.1 | PREDICTED: similar to Small nuclear ribonucleoprotein polypeptide A (LOC100047155)                                                                      | 0.55 |
| LOC100047167 | XM_001477568.1 | PREDICTED: similar to mKIAA0990 protein (LOC100047167)                                                                                                  | 0.39 |
| LOC100047268 | XM_001477774.1 | PREDICTED: similar to Immediate early response 5-like (LOC100047268)                                                                                    | 0.24 |
| LOC100047353 | XM_001477963.1 | PREDICTED: similar to myocardial vascular inhibition factor (LOC100047353)                                                                              | 0.60 |
| LOC100047490 | XM_001478266.1 | PREDICTED: similar to putative oral cancer suppressor (LOC100047490)                                                                                    | 0.62 |
| LOC100047606 | XR_033719.1    | PREDICTED: similar to neurotrophic tyrosine kinase, receptor, type 3 (LOC100047606), misc RNA.                                                          | 0.67 |
| LOC100047615 | XR_033484.1    | PREDICTED: similar to 40S ribosomal protein S17 (LOC100047615), misc RNA.                                                                               | 0.57 |
| LOC100047619 | XR_033736.1    | PREDICTED: similar to solute carrier family 7 (cationic amino acid transporter, y+ system), member 5 (LOC100047619), misc RNA.                          | 0.19 |
| LOC100047634 | XR_032896.1    | PREDICTED: similar to Eukaryotic translation initiation factor 2 alpha kinase 3 (LOC100047634), misc RNA.                                               | 0.61 |
| LOC100047712 | XM_001478724.1 | PREDICTED: similar to coiled-coil domain containing 101 (LOC100047712)                                                                                  | 0.65 |
| LOC100047759 | XM_001479214.1 | PREDICTED: similar to acidic ribosomal phosphoprotein P1, transcript variant 1 (LOC100047759)                                                           | 0.49 |
| LOC100047762 | XM_001478835.1 | PREDICTED: similar to Aspartate aminotransferase, cytoplasmic (Transaminase A) (Glutamate oxaloacetate transaminase 1) (LOC100047762)                   | 0.64 |
| LOC100047827 | XM_001479392.1 | PREDICTED: similar to Hmgn2 protein (LOC100047827)                                                                                                      | 0.39 |
| LOC100047888 | XM_001479068.1 | PREDICTED: similar to Neurocan (LOC100047888)                                                                                                           | 0.31 |
| LOC100047915 | XM_001479122.1 | PREDICTED: similar to Memo1 protein (LOC100047915)                                                                                                      | 0.61 |
| LOC100047934 | XM_001478074.1 | PREDICTED: hypothetical protein LOC100047934 (LOC100047934)                                                                                             | 0.38 |
| LOC100047935 | XR_033756.1    | PREDICTED: similar to ribosomal protein L5 (LOC100047935), misc RNA.                                                                                    | 0.63 |
| LOC100047937 | XM_001479188.1 | PREDICTED: similar to Aldehyde dehydrogenase 1 family, member L1 (LOC100047937)                                                                         | 0.64 |
| LOC100047998 | XM_001479497.1 | PREDICTED: similar to ribosomal protein L37a (LOC100047998)                                                                                             | 0.51 |
| LOC100048413 | XM_001480186.1 | PREDICTED: similar to Myeloid leukemia factor 2 (LOC100048413)                                                                                          | 0.52 |
| LOC100048445 | XM_001480467.1 | PREDICTED: similar to fau (LOC100048445)                                                                                                                | 0.57 |
| LOC100048483 | XM_001480453.1 | PREDICTED: similar to cytochrome c oxidase subunit VIII (LOC100048483)                                                                                  | 0.59 |
| LOC100048508 | XM_001480806.1 | PREDICTED: similar to Rpl36 protein, transcript variant 1 (LOC100048508)                                                                                | 0.61 |
| LOC100048613 | XM_001480380.1 | PREDICTED: similar to cytochrome c oxidase, subunit VIIC, transcript variant 1 (LOC100048613)                                                           | 0.56 |

|              |                |                                                                                           |      |
|--------------|----------------|-------------------------------------------------------------------------------------------|------|
| LOC100048645 | XM_001480791.1 | PREDICTED: similar to cysteine and glycine-rich protein 2 binding protein (LOC100048645)  | 0.60 |
| LOC209281    | XR_002517.1    | PREDICTED: similar to capping protein (actin filament) muscle Z-line, alpha 1 (LOC209281) | 0.64 |
| LOC212399    | XM_137003.2    |                                                                                           | 0.38 |
| LOC219106    | XM_139078.2    |                                                                                           | 0.64 |
| LOC219145    | XM_122761.3    |                                                                                           | 0.43 |
| LOC225058    | XM_140116.1    |                                                                                           | 0.58 |
| LOC225134    | XR_031257.1    | PREDICTED: similar to ribosomal protein S4, X-linked (LOC225134), misc RNA.               | 0.51 |
| LOC226416    | XM_129460.4    |                                                                                           | 0.61 |
| LOC229810    | XM_124173.2    |                                                                                           | 0.66 |
| LOC230253    | XM_124269.2    |                                                                                           | 0.29 |
| LOC230896    | XM_124427.4    |                                                                                           | 0.64 |
| LOC231368    | XR_002491.1    | PREDICTED: similar to 60S acidic ribosomal protein P0 (L10E) (LOC231368)                  | 0.41 |
| LOC232606    | XM_124826.2    |                                                                                           | 0.48 |
| LOC232887    | XM_124858.2    |                                                                                           | 0.66 |
| LOC232890    | XM_145374.2    |                                                                                           | 0.49 |
| LOC236831    | XR_001889.1    | PREDICTED: similar to 60S ribosomal protein L7a (LOC236831)                               | 0.48 |
| LOC237512    | XM_137226.3    |                                                                                           | 0.51 |
| LOC237877    | XM_111221.4    |                                                                                           | 0.57 |
| LOC238943    | XM_138902.2    |                                                                                           | 0.65 |
| LOC241621    | XM_917314.2    | PREDICTED: similar to ribosomal protein L27a-like (LOC241621)                             | 0.37 |
| LOC245668    | XM_142236.4    |                                                                                           | 0.43 |
| LOC245892    | XM_147335.2    |                                                                                           | 0.17 |
| LOC268569    | XM_195821.2    |                                                                                           | 0.23 |
| LOC268700    | XM_193742.2    |                                                                                           | 0.52 |
| LOC269251    | XM_193262.3    |                                                                                           | 0.39 |
| LOC269515    | XM_196313.1    |                                                                                           | 0.67 |
| LOC270037    | XM_193374.2    |                                                                                           | 0.38 |
| LOC271490    | XM_195069.2    |                                                                                           | 0.47 |
| LOC271505    | XM_195066.3    |                                                                                           | 0.55 |
| LOC272681    | XM_195399.2    |                                                                                           | 0.54 |
| LOC277856    | XM_204210.2    |                                                                                           | 0.58 |
| LOC329076    | XM_282724.2    |                                                                                           | 0.45 |
| LOC331102    | XM_284573.2    |                                                                                           | 0.65 |
| LOC331507    | XM_284733.2    |                                                                                           | 0.64 |
| LOC380692    | XM_354604.1    |                                                                                           | 0.28 |
| LOC380707    | XM_354622.1    |                                                                                           | 0.61 |
| LOC380927    | XM_354834.1    |                                                                                           | 0.51 |
| LOC380930    | XM_358467.1    |                                                                                           | 0.44 |
| LOC381046    | XM_354963.1    |                                                                                           | 0.37 |
| LOC381114    | XM_355032.1    |                                                                                           | 0.29 |
| LOC381140    | XM_355056.1    |                                                                                           | 0.63 |
| LOC381215    | XM_355149.1    |                                                                                           | 0.55 |
| LOC381230    | XM_355167.1    |                                                                                           | 0.61 |
| LOC381285    | XM_355225.1    |                                                                                           | 0.65 |
| LOC381330    | XM_355288.1    |                                                                                           | 0.48 |
| LOC381365    | XM_355330.1    |                                                                                           | 0.56 |
| LOC381398    | XM_355356.1    |                                                                                           | 0.43 |
| LOC381448    | XM_355403.1    |                                                                                           | 0.46 |
| LOC381561    | XM_355526.1    |                                                                                           | 0.60 |
| LOC381649    | XM_355612.1    |                                                                                           | 0.54 |
| LOC381799    | XM_355801.1    |                                                                                           | 0.65 |
| LOC381808    | XM_355809.1    |                                                                                           | 0.56 |
| LOC381891    | XM_355907.1    |                                                                                           | 0.56 |
| LOC381940    | XM_355964.1    |                                                                                           | 0.62 |
| LOC381999    | XM_356062.1    |                                                                                           | 0.50 |
| LOC382061    | XM_356141.1    |                                                                                           | 0.52 |
| LOC382128    | XM_356225.1    |                                                                                           | 0.66 |
| LOC382230    | XM_356342.1    |                                                                                           | 0.50 |
| LOC382885    | XM_356731.1    |                                                                                           | 0.56 |
| LOC383099    | XM_356873.1    |                                                                                           | 0.65 |
| LOC383308    | XM_356977.1    |                                                                                           | 0.42 |
| LOC383330    | XM_356987.1    |                                                                                           | 0.54 |
| LOC383897    | XM_357315.1    |                                                                                           | 0.57 |
| LOC383942    | XM_357338.1    |                                                                                           | 0.65 |
| LOC384104    | XM_357429.1    |                                                                                           | 0.65 |
| LOC384206    | XM_357488.1    |                                                                                           | 0.57 |
| LOC384727    | XM_357823.1    |                                                                                           | 0.59 |

|           |                |                                                                                                                           |      |
|-----------|----------------|---------------------------------------------------------------------------------------------------------------------------|------|
| LOC385905 | XR_034995.1    | PREDICTED: similar to proteasome alpha7/C8 subunit (LOC385905), misc RNA.                                                 | 0.65 |
| LOC433476 | XM_917865.2    | PREDICTED: similar to ribosomal protein L27a (LOC433476)                                                                  | 0.37 |
| LOC433745 | XM_001475733.1 | PREDICTED: similar to ribosomal protein L3 (LOC433745)                                                                    | 0.56 |
| LOC545056 | NR_002889.1    | ubiquitin-conjugating enzyme E2, J2 homolog pseudogene (LOC545056) on chromosome 14.                                      | 0.57 |
| LOC545369 | XR_034542.1    | PREDICTED: similar to ribosomal protein L4 (LOC545369), misc RNA.                                                         | 0.59 |
| LOC545396 | XR_003545.1    | PREDICTED: similar to TGF beta-inducible nuclear protein 1 (L-name-related protein 42) (LNR42) (LOC545396)                | 0.62 |
| LOC545472 | XM_619824.4    | PREDICTED: similar to BTB (POZ) domain containing 1 (LOC545472)                                                           | 0.67 |
| LOC546015 | XR_034790.1    | PREDICTED: similar to ribosomal protein S9 (LOC546015), misc RNA.                                                         | 0.61 |
| LOC620678 | XR_031536.1    | PREDICTED: similar to 60S ribosomal protein L7 (LOC620678), misc RNA.                                                     | 0.55 |
| LOC622655 | XR_032410.1    | PREDICTED: similar to hCG31107 (LOC622655), misc RNA.                                                                     | 0.33 |
| LOC622994 | XR_031862.1    | PREDICTED: hypothetical LOC622994 (LOC622994), misc RNA.                                                                  | 0.47 |
| LOC623466 | XR_033501.1    | PREDICTED: similar to MGC27348 protein (LOC623466), misc RNA.                                                             | 0.43 |
| LOC623568 | XM_001480472.1 | PREDICTED: similar to ribosomal protein S20 (LOC623568)                                                                   | 0.41 |
| LOC630729 | XM_904332.3    | PREDICTED: similar to glutathione reductase 1 (LOC630729)                                                                 | 0.54 |
| LOC630936 | XR_001819.2    | PREDICTED: similar to nuclease sensitive element binding protein 1 (LOC630936), misc RNA.                                 | 0.27 |
| LOC632022 | XR_030945.1    | PREDICTED: similar to 40S ribosomal protein S18 (LOC632022), misc RNA.                                                    | 0.65 |
| LOC632230 | XR_031205.1    | PREDICTED: similar to Ribosomal protein L5 (LOC632230), misc RNA.                                                         | 0.56 |
| LOC632667 | XM_906862.3    | PREDICTED: similar to PNG protein (LOC632667)                                                                             | 0.57 |
| LOC632684 | XR_031426.1    | PREDICTED: hypothetical LOC632684 (LOC632684), misc RNA.                                                                  | 0.59 |
| LOC633016 | XM_921371.2    | PREDICTED: similar to Chromobox homolog 3 (HP1 gamma homolog, Drosophila), transcript variant 2 (LOC633016)               | 0.46 |
| LOC635470 | XM_915945.3    | PREDICTED: similar to ribosomal protein L27a-like (LOC635470)                                                             | 0.43 |
| LOC638892 | XM_915073.1    | PREDICTED: similar to cpn10 protein (LOC638892)                                                                           | 0.62 |
| LOC640739 | XM_925296.2    | PREDICTED: hypothetical LOC640739 (LOC640739)                                                                             | 0.16 |
| LOC640972 | XM_918222.2    | PREDICTED: similar to cyclin-dependent kinase 2-interacting protein (LOC640972)                                           | 0.62 |
| LOC654426 | NR_002690.1    | ATP synthase, H+ transporting, mitochondrial F0 complex, subunit F pseudogene (LOC654426), non-coding RNA.                | 0.65 |
| LOC654467 | NR_002885.1    | heterogeneous nuclear ribonucleoprotein A1 pseudogene (LOC654467) on chromosome 9.                                        | 0.42 |
| LOC654842 | NM_001081681.1 | hypothetical protein LOC654842 (LOC654842)                                                                                | 0.39 |
| LOC665032 | XM_991641.1    | PREDICTED: similar to ribosomal protein (LOC665032)                                                                       | 0.51 |
| LOC665235 | XR_031650.1    | PREDICTED: similar to hCG1642689 (LOC665235), misc RNA.                                                                   | 0.63 |
| LOC665237 | XR_031476.1    | PREDICTED: similar to hCG31107 (LOC665237), misc RNA.                                                                     | 0.33 |
| LOC665281 | XR_031065.1    | PREDICTED: similar to 40S ribosomal protein S12 (LOC665281), misc RNA.                                                    | 0.44 |
| LOC666559 | XR_031145.1    | PREDICTED: similar to farnesyl pyrophosphate synthase (LOC666559), misc RNA.                                              | 0.26 |
| LOC666676 | XR_030655.1    | PREDICTED: similar to ADP-ribosylation factor (LOC666676), misc RNA.                                                      | 0.49 |
| LOC667005 | XR_030797.1    | PREDICTED: similar to cyclin B1 (LOC667005), misc RNA.                                                                    | 0.43 |
| LOC667251 | XR_032081.1    | PREDICTED: similar to NADPH cytochrome B5 oxidoreductase (LOC667251), misc RNA.                                           | 0.61 |
| LOC667609 | XR_032582.1    | PREDICTED: similar to mitochondrial ribosomal protein S5 (LOC667609), misc RNA.                                           | 0.66 |
| LOC668038 | XR_034201.1    | PREDICTED: similar to ribosomal protein (LOC668038), misc RNA.                                                            | 0.46 |
| LOC668239 | XM_001000226.2 | PREDICTED: similar to Rps13 protein (LOC668239)                                                                           | 0.47 |
| LOC668387 | XR_031651.1    | PREDICTED: similar to ribosomal protein S6 (LOC668387), misc RNA.                                                         | 0.54 |
| LOC668492 | XR_034647.1    | PREDICTED: similar to zinc finger CCHC-type and RNA binding motif 1 (LOC668492), misc RNA.                                | 0.63 |
| LOC668573 | XR_035016.1    | PREDICTED: similar to ribosomal protein (LOC668573), misc RNA.                                                            | 0.40 |
| LOC668706 | XM_001003212.2 | PREDICTED: similar to Ribosomal protein L12 (LOC668706)                                                                   | 0.36 |
| LOC669658 | XM_976371.1    | PREDICTED: similar to melanoma antigen (LOC669658)                                                                        | 0.54 |
| LOC669660 | XM_976375.1    | PREDICTED: similar to PDZ and LIM domain protein 5 (Enigma homolog) (Enigma-like PDZ and LIM domains protein) (LOC669660) | 0.62 |
| LOC671641 | XM_001479052.1 | PREDICTED: similar to ribosomal protein S12 (LOC671641)                                                                   | 0.54 |
| LOC671878 | XM_001473434.1 | PREDICTED: similar to spermine synthase (LOC671878)                                                                       | 0.37 |
| LOC672474 | XM_993721.1    | PREDICTED: similar to 60S ribosomal protein L29 (LOC672474)                                                               | 0.58 |
| LOC674611 | XM_980150.1    | PREDICTED: similar to Su48, transcript variant 3 (LOC674611)                                                              | 0.38 |
| LOC675377 | XR_005113.2    | PREDICTED: similar to Ribosomal protein L8 (LOC675377), misc RNA.                                                         | 0.51 |
| LOC675440 | XM_001479274.1 | PREDICTED: similar to SMT3 suppressor of mif two 3 homolog 2 (S. cerevisiae), transcript variant 1 (LOC675440)            | 0.62 |
| LOC675813 | XR_032773.1    | PREDICTED: similar to ribosomal protein S20 (LOC675813), misc RNA.                                                        | 0.58 |
| LOC675899 | XM_985882.1    | PREDICTED: similar to H2A histone family, member Z (LOC675899)                                                            | 0.26 |
| LOC676420 | XR_031436.1    | PREDICTED: similar to ceramide kinases (LOC676420), misc RNA.                                                             | 0.57 |
| LOC676640 | XM_001003712.1 | PREDICTED: similar to neuron navigator 3, transcript variant 5 (LOC676640)                                                | 0.32 |
| LOC676724 | XM_992449.1    | PREDICTED: hypothetical LOC676724 (LOC676724)                                                                             | 0.47 |
| LOC677205 | XR_034818.1    | PREDICTED: similar to DEAD (Asp-Glu-Ala-Asp) box polypeptide 18 (LOC677205), misc RNA.                                    | 0.53 |

|                  |                |                                                                                                     |      |
|------------------|----------------|-----------------------------------------------------------------------------------------------------|------|
| <i>LOC677215</i> | XM_001001411.2 | PREDICTED: similar to acidic ribosomal phosphoprotein P1, transcript variant 1 (LOC677215)          | 0.64 |
| <i>LOC677317</i> | XM_001004685.1 | PREDICTED: similar to Mod1 protein, transcript variant 4 (LOC677317)                                | 0.53 |
| <i>LOC677448</i> | XR_005062.2    | PREDICTED: similar to actin (LOC677448), misc RNA.                                                  | 0.57 |
| <i>LOC677551</i> | XR_005084.2    | PREDICTED: similar to Ribosomal protein L19 (LOC677551), misc RNA.                                  | 0.56 |
| <i>Lor</i>       | NM_008508.2    | loricrin (Lor)                                                                                      | 0.31 |
| <i>Lphn3</i>     | NM_198702.2    | latrophilin 3 (Lphn3)                                                                               | 0.58 |
| <i>Lpl</i>       | NM_008509.2    | lipoprotein lipase (Lpl)                                                                            | 0.31 |
| <i>Lrig1</i>     | NM_008377.2    | leucine-rich repeats and immunoglobulin-like domains 1 (Lrig1)                                      | 0.33 |
| <i>Lrp12</i>     | NM_172814.1    | low density lipoprotein-related protein 12 (Lrp12)                                                  | 0.54 |
| <i>Lrrc59</i>    | NM_133807.1    | leucine rich repeat containing 59 (Lrrc59)                                                          | 0.44 |
| <i>Lrrfp1</i>    | NM_008515.1    | leucine rich repeat (in FLII) interacting protein 1 (Lrrfp1)                                        | 0.32 |
| <i>Lsg1</i>      | NM_178069.5    | large subunit GTPase 1 homolog (S. cerevisiae) (Lsg1)                                               | 0.64 |
| <i>Lsm12</i>     | NM_172947.1    | LSM12 homolog (S. cerevisiae) (Lsm12)                                                               | 0.62 |
| <i>Lsm2</i>      | NM_030597.2    | LSM2 homolog, U6 small nuclear RNA associated (S. cerevisiae) (Lsm2)                                | 0.44 |
| <i>Lsm3</i>      | NM_026309.1    | LSM3 homolog, U6 small nuclear RNA associated (S. cerevisiae) (Lsm3)                                | 0.54 |
| <i>Lsm4</i>      | NM_015816.1    | LSM4 homolog, U6 small nuclear RNA associated (S. cerevisiae) (Lsm4)                                | 0.47 |
| <i>Lsm5</i>      | NM_025520.2    | LSM5 homolog, U6 small nuclear RNA associated (S. cerevisiae) (Lsm5)                                | 0.41 |
| <i>Lsm6</i>      | NM_030145.2    | LSM6 homolog, U6 small nuclear RNA associated (S. cerevisiae) (Lsm6)                                | 0.48 |
| <i>Lsm8</i>      | NM_133939.1    | LSM8 homolog, U6 small nuclear RNA associated (S. cerevisiae) (Lsm8)                                | 0.42 |
| <i>Lss</i>       | NM_146006.1    | lanosterol synthase (Lss)                                                                           | 0.40 |
| <i>Ltp1</i>      | NM_206958.1    | latent transforming growth factor beta binding protein 1 (Ltp1), transcript variant 2               | 0.42 |
| <i>Ly96</i>      | NM_016923.1    | lymphocyte antigen 96 (Ly96)                                                                        | 0.58 |
| <i>Lyar</i>      | NM_025281.2    | Ly1 antibody reactive clone (Lyar)                                                                  | 0.60 |
| <i>Lypla2</i>    | NM_011942.1    | lysophospholipase 2 (Lypla2)                                                                        | 0.56 |
| <i>Mad21</i>     | NM_019499.2    | MAD2 (mitotic arrest deficient, homolog)-like 1 (yeast) (Mad21)                                     | 0.27 |
| <i>Maged1</i>    | NM_019791.2    | melanoma antigen, family D, 1 (Maged1)                                                              | 0.36 |
| <i>Mageh1</i>    | NM_023788.3    | melanoma antigen, family H, 1 (Mageh1)                                                              | 0.57 |
| <i>Magi1</i>     | NM_010367.2    | membrane associated guanylate kinase, WW and PDZ domain containing 1 (Magi1), transcript variant 1  | 0.55 |
| <i>Mak16</i>     | NM_026453.3    | MAK16 homolog (S. cerevisiae) (Mak16)                                                               | 0.49 |
| <i>Mamdc2</i>    | NM_174857.3    | MAM domain containing 2 (Mamdc2)                                                                    | 0.47 |
| <i>Man2a1</i>    | NM_008549.1    | mannosidase 2, alpha 1 (Man2a1)                                                                     | 0.48 |
| <i>Manba</i>     | NM_027288.2    | mannosidase, beta A, lysosomal (Manba)                                                              | 0.56 |
| <i>Map2k2</i>    | NM_023138.3    | mitogen activated protein kinase kinase 2 (Map2k2)                                                  | 0.65 |
| <i>Map2k3</i>    | NM_008928.3    | mitogen activated protein kinase kinase 3 (Map2k3)                                                  | 0.45 |
| <i>Map2k4</i>    | NM_009157.2    | mitogen activated protein kinase kinase 4 (Map2k4)                                                  | 0.55 |
| <i>Map4k4</i>    | NM_008696.2    | mitogen-activated protein kinase kinase kinase 4 (Map4k4)                                           | 0.50 |
| <i>Mapk1</i>     | NM_011949.3    | mitogen-activated protein kinase 1 (Mapk1), transcript variant 1                                    | 0.64 |
| <i>Mapk6</i>     | NM_027418.1    | mitogen-activated protein kinase 6 (Mapk6), transcript variant 2                                    | 0.53 |
| <i>Marcks</i>    | NM_008538.2    | myristoylated alanine rich protein kinase C substrate (Marcks)                                      | 0.60 |
| <i>Marcks1</i>   | NM_010807.3    | MARCKS-like 1 (Marcks1)                                                                             | 0.64 |
| <i>Mars2</i>     | NM_175439.3    | methionine-tRNA synthetase 2 (mitochondrial) (Mars2), nuclear gene encoding mitochondrial protein   | 0.62 |
| <i>Mast2</i>     | NM_008641.2    | microtubule associated serine/threonine kinase 2 (Mast2), transcript variant 2                      | 0.66 |
| <i>Mbd3</i>      | NM_013595.2    | methyl-CpG binding domain protein 3 (Mbd3)                                                          | 0.62 |
| <i>Mbn1</i>      | NM_020007.3    | muscleblind-like 1 (Drosophila) (Mbn1)                                                              | 0.54 |
| <i>Mboat1</i>    | NM_153546.3    | membrane bound O-acyltransferase domain containing 1 (Mboat1)                                       | 0.63 |
| <i>Mcat</i>      | NM_001030014.2 | malonyl CoA:ACP acyltransferase (mitochondrial) (Mcat), nuclear gene encoding mitochondrial protein | 0.66 |
| <i>Mcc</i>       | NM_001033406.1 | mutated in colorectal cancers (Mcc)                                                                 | 0.66 |
| <i>Mcfd2</i>     | NM_139295.2    | multiple coagulation factor deficiency 2 (Mcfd2)                                                    | 0.58 |
| <i>Mcm10</i>     | NM_027290.1    | minichromosome maintenance deficient 10 (S. cerevisiae) (Mcm10)                                     | 0.23 |
| <i>Mcm2</i>      | NM_008564.1    | minichromosome maintenance deficient 2 mitotin (S. cerevisiae) (Mcm2)                               | 0.29 |
| <i>Mcm3</i>      | NM_008563.2    | minichromosome maintenance deficient 3 (S. cerevisiae) (Mcm3)                                       | 0.53 |
| <i>Mcm4</i>      | NM_008565.2    | minichromosome maintenance deficient 4 homolog (S. cerevisiae) (Mcm4)                               | 0.28 |
| <i>Mcm5</i>      | NM_008566.2    | minichromosome maintenance deficient 5, cell division cycle 46 (S. cerevisiae) (Mcm5)               | 0.14 |
| <i>Mcm6</i>      | NM_008567.1    | minichromosome maintenance deficient 6 (MIS5 homolog, S. pombe) (S. cerevisiae) (Mcm6)              | 0.25 |
| <i>Mcm7</i>      | NM_008568.2    | minichromosome maintenance deficient 7 (S. cerevisiae) (Mcm7)                                       | 0.48 |
| <i>Mdga2</i>     | NM_207010.1    | MAM domain containing glycosylphosphatidylinositol anchor 2 (Mdga2)                                 | 0.51 |
| <i>Mdh2</i>      | NM_008617.2    | malate dehydrogenase 2, NAD (mitochondrial) (Mdh2), nuclear gene encoding mitochondrial protein     | 0.40 |
| <i>Med10</i>     | NM_138596.1    | mediator of RNA polymerase II transcription, subunit 10 homolog (NUT2, S. cerevisiae) (Med10)       | 0.55 |
| <i>Mef2c</i>     | NM_025282.2    | myocyte enhancer factor 2C (Mef2c)                                                                  | 0.58 |
| <i>Mela</i>      | NM_008581      |                                                                                                     | 0.20 |
| <i>Melk</i>      | NM_010790.2    | maternal embryonic leucine zipper kinase (Melk)                                                     | 0.66 |

|                  |                |                                                                                                          |      |
|------------------|----------------|----------------------------------------------------------------------------------------------------------|------|
| <i>Mertk</i>     | NM_008587.1    | c-mer proto-oncogene tyrosine kinase (Mertk)                                                             | 0.63 |
| <i>Mest</i>      | NM_008590.1    | mesoderm specific transcript (Mest)                                                                      | 0.14 |
| <i>Metap1</i>    | NM_175224.4    | methionyl aminopeptidase 1 (Metap1)                                                                      | 0.64 |
| <i>Metap2</i>    | NM_019648.3    | methionine aminopeptidase 2 (Metap2)                                                                     | 0.66 |
| <i>Metrn</i>     | NM_133719      |                                                                                                          | 0.39 |
| <i>Mex3a</i>     | NM_001029890.1 | mex3 homolog A (C. elegans) (Mex3a)                                                                      | 0.49 |
| <i>Mfap3</i>     | NM_145426.2    | microfibrillar-associated protein 3 (Mfap3), transcript variant 1                                        | 0.63 |
| <i>Mfge8</i>     | NM_001045489.1 | milk fat globule-EGF factor 8 protein (Mfge8), transcript variant 2                                      | 0.42 |
| <i>Mfhas1</i>    | NM_001081279.1 | malignant fibrous histiocytoma amplified sequence 1 (Mfhas1)                                             | 0.42 |
| <i>Mki67</i>     | XM_001000692.2 | PREDICTED: antigen identified by monoclonal antibody Ki 67 (Mki67)                                       | 0.15 |
| <i>Mki67ip</i>   | NM_026472.3    | Mki67 (FHA domain) interacting nucleolar phosphoprotein (Mki67ip)                                        | 0.58 |
| <i>mKIAA0282</i> | AK129109       |                                                                                                          | 0.17 |
| <i>Mknk2</i>     | NM_021462.3    | MAP kinase-interacting serine/threonine kinase 2 (Mknk2)                                                 | 0.62 |
| <i>Mllt11</i>    | NM_019914.3    | myeloid/lymphoid or mixed-lineage leukemia (trithorax homolog, Drosophila); translocated to, 11 (Mllt11) | 0.39 |
| <i>Mllt4</i>     | NM_010806.1    | myeloid/lymphoid or mixed-lineage leukemia (trithorax homolog, Drosophila); translocated to, 4 (Mllt4)   | 0.61 |
| <i>Mmp15</i>     | NM_008609.3    | matrix metallopeptidase 15 (Mmp15)                                                                       | 0.32 |
| <i>Mmp17</i>     | NM_011846.4    | matrix metallopeptidase 17 (Mmp17)                                                                       | 0.55 |
| <i>Mod1</i>      | NM_008615.1    | malic enzyme, supernatant (Mod1)                                                                         | 0.49 |
| <i>Morc2a</i>    | NM_198162.1    | microorchidia 2A (Morc2a)                                                                                | 0.65 |
| <i>Mphosph6</i>  | NM_026758.3    | M phase phosphoprotein 6 (Mphosph6)                                                                      | 0.53 |
| <i>Mphosph9</i>  | NM_001081323.1 | M-phase phosphoprotein 9 (Mphosph9)                                                                      | 0.46 |
| <i>Mpi</i>       | NM_025837.2    | mannose phosphate isomerase (Mpi)                                                                        | 0.64 |
| <i>Mpnd</i>      | NM_026530.5    | MPN domain containing (Mpnd)                                                                             | 0.66 |
| <i>Mre11a</i>    | NM_018736.2    | meiotic recombination 11 homolog A (S. cerevisiae) (Mre11a)                                              | 0.59 |
| <i>Mrpl12</i>    | NM_027204.2    | mitochondrial ribosomal protein L12 (Mrpl12), nuclear gene encoding mitochondrial protein                | 0.46 |
| <i>Mrpl15</i>    | AK017804       |                                                                                                          | 0.56 |
| <i>Mrpl17</i>    | NM_025301.1    |                                                                                                          | 0.55 |
| <i>Mrpl18</i>    | NM_026310.3    | mitochondrial ribosomal protein L18 (Mrpl18), nuclear gene encoding mitochondrial protein                | 0.64 |
| <i>Mrpl20</i>    | NM_025570.2    | mitochondrial ribosomal protein L20 (Mrpl20), nuclear gene encoding mitochondrial protein                | 0.58 |
| <i>Mrpl22</i>    | NM_175001.2    | mitochondrial ribosomal protein L22 (Mrpl22), nuclear gene encoding mitochondrial protein                | 0.61 |
| <i>Mrpl3</i>     | NM_053159.3    | mitochondrial ribosomal protein L3 (Mrpl3), nuclear gene encoding mitochondrial protein                  | 0.62 |
| <i>Mrpl30</i>    | NM_027098.2    | mitochondrial ribosomal protein L30 (Mrpl30), nuclear gene encoding mitochondrial protein                | 0.59 |
| <i>Mrpl34</i>    | NM_053162.2    | mitochondrial ribosomal protein L34 (Mrpl34), nuclear gene encoding mitochondrial protein                | 0.59 |
| <i>Mrpl37</i>    | NM_025500.1    | mitochondrial ribosomal protein L37 (Mrpl37), nuclear gene encoding mitochondrial protein                | 0.63 |
| <i>Mrpl38</i>    | NM_024177.3    | mitochondrial ribosomal protein L38 (Mrpl38), nuclear gene encoding mitochondrial protein                | 0.61 |
| <i>Mrpl43</i>    | NM_053164.3    | mitochondrial ribosomal protein L43 (Mrpl43), nuclear gene encoding mitochondrial protein                | 0.62 |
| <i>Mrpl52</i>    | NM_026851.2    | mitochondrial ribosomal protein L52 (Mrpl52), nuclear gene encoding mitochondrial protein                | 0.65 |
| <i>Mrpl53</i>    | NM_026744.3    | mitochondrial ribosomal protein L53 (Mrpl53), nuclear gene encoding mitochondrial protein                | 0.46 |
| <i>Mrpl54</i>    | NM_025317.2    | mitochondrial ribosomal protein L54 (Mrpl54), nuclear gene encoding mitochondrial protein                | 0.60 |
| <i>Mrps10</i>    | NM_183086      |                                                                                                          | 0.53 |
| <i>Mrps16</i>    | NM_025440.2    | mitochondrial ribosomal protein S16 (Mrps16), nuclear gene encoding mitochondrial protein                | 0.64 |
| <i>Mrps18b</i>   | NM_025878.1    | mitochondrial ribosomal protein S18B (Mrps18b), nuclear gene encoding mitochondrial protein              | 0.58 |
| <i>Mrps2</i>     | NM_080452.2    | mitochondrial ribosomal protein S2 (Mrps2), nuclear gene encoding mitochondrial protein                  | 0.64 |
| <i>Mrps28</i>    | NM_025434.2    | mitochondrial ribosomal protein S28 (Mrps28), nuclear gene encoding mitochondrial protein                | 0.58 |
| <i>Mrps30</i>    | NM_021556.3    | mitochondrial ribosomal protein S30 (Mrps30), nuclear gene encoding mitochondrial protein                | 0.63 |
| <i>Mrps35</i>    | NM_145573.2    | mitochondrial ribosomal protein S35 (Mrps35), nuclear gene encoding mitochondrial protein                | 0.62 |
| <i>Mrps7</i>     | NM_025305.1    | mitochondrial ribosomal protein S7 (Mrps7)                                                               | 0.47 |
| <i>Mrto4</i>     | NM_023536.2    | MRT4, mRNA turnover 4, homolog (S. cerevisiae) (Mrto4)                                                   | 0.52 |
| <i>Msl211</i>    | XM_150227.8    | PREDICTED: male-specific lethal 2-like 1 (Drosophila) (Msl211)                                           | 0.58 |

|                       |                |                                                                                                             |      |
|-----------------------|----------------|-------------------------------------------------------------------------------------------------------------|------|
| <i>Msto1</i>          | NM_144898.1    | misato homolog 1 (Drosophila) (Msto1)                                                                       | 0.64 |
| <i>Mta2</i>           | NM_011842.3    | metastasis-associated gene family, member 2 (Mta2)                                                          | 0.61 |
| <i>Mtap</i>           | NM_024433.1    | methylthioadenosine phosphorylase (Mtap)                                                                    | 0.49 |
| <i>Mtch2</i>          | NM_019758.2    | mitochondrial carrier homolog 2 (C. elegans) (Mtch2), nuclear gene encoding mitochondrial protein           | 0.66 |
| <i>mt-Co2</i>         |                |                                                                                                             | 0.63 |
| <i>Mtdh</i>           | NM_026002.4    | Metadherin (Mtdh)                                                                                           | 0.48 |
| <i>mtDNA_ATP8</i>     |                |                                                                                                             | 0.64 |
| <i>Mthfd2</i>         | NM_008638      |                                                                                                             | 0.22 |
| <i>Mtmr11</i>         | NM_181409.2    | myotubularin related protein 11 (Mtmr11)                                                                    | 0.51 |
| <i>Mtmr12</i>         | NM_172958.3    | myotubularin related protein 12 (Mtmr12)                                                                    | 0.56 |
| <i>Mtmr2</i>          | NM_023858.1    | myotubularin related protein 2 (Mtmr2)                                                                      | 0.52 |
| <i>Mvd</i>            | NM_138656.1    | mevalonate (diphospho) decarboxylase (Mvd)                                                                  | 0.56 |
| <i>Mxra8</i>          | NM_024263.3    | matrix-remodelling associated 8 (Mxra8)                                                                     | 0.60 |
| <i>Mybbp1a</i>        | NM_016776.2    | MYB binding protein (P160) 1a (Mybbp1a)                                                                     | 0.56 |
| <i>Mybl2</i>          | NM_008652.2    | myeloblastosis oncogene-like 2 (Mybl2)                                                                      | 0.46 |
| <i>Myef2</i>          | NM_010852.1    | myelin basic protein expression factor 2, repressor (Myef2)                                                 | 0.49 |
| <i>Myh9</i>           | NM_022410.1    |                                                                                                             | 0.56 |
| <i>Mylk</i>           | NM_139300.3    | myosin, light polypeptide kinase (Mylk)                                                                     | 0.22 |
| <i>Myo1b</i>          | NM_010863.2    | myosin IB (Myo1b)                                                                                           | 0.55 |
| <i>Myo5a</i>          | NM_010864.2    | myosin Va (Myo5a)                                                                                           | 0.44 |
| <i>Myo6</i>           | NM_001039546.1 | myosin VI (Myo6)                                                                                            | 0.49 |
| <i>N4wbp5-pending</i> | AK050560       |                                                                                                             | 0.64 |
| <i>N6amt1</i>         | NM_026366.1    | N-6 adenine-specific DNA methyltransferase 1 (putative) (N6amt1)                                            | 0.60 |
| <i>N6amt2</i>         | NM_026526.2    | N-6 adenine-specific DNA methyltransferase 2 (putative) (N6amt2)                                            | 0.51 |
| <i>Nab1</i>           | NM_008667.2    | Ngfi-A binding protein 1 (Nab1)                                                                             | 0.52 |
| <i>Naca</i>           | NM_013608.2    | nascent polypeptide-associated complex alpha polypeptide (Naca)                                             | 0.50 |
| <i>Nadk</i>           | NM_138671.1    | NAD kinase (Nadk)                                                                                           | 0.66 |
| <i>Nans</i>           | NM_053179.3    | N-acetylneuraminic acid synthase (sialic acid synthase) (Nans)                                              | 0.43 |
| <i>Nap111</i>         | NM_015781.3    | nucleosome assembly protein 1-like 1 (Nap111)                                                               | 0.35 |
| <i>Nap114</i>         | NM_008672      |                                                                                                             | 0.65 |
| <i>Nap115</i>         | NM_021432.2    | nucleosome assembly protein 1-like 5 (Nap115)                                                               | 0.59 |
| <i>Narg1</i>          | NM_053089.2    | NMDA receptor-regulated gene 1 (Narg1)                                                                      | 0.46 |
| <i>Nasp</i>           | NM_016777.3    | nuclear autoantigenic sperm protein (histone-binding) (Nasp), transcript variant 2                          | 0.53 |
| <i>Nat5</i>           | NM_026425.1    | N-acetyltransferase 5 (ARD1 homolog, S. cerevisiae) (Nat5)                                                  | 0.56 |
| <i>Nav1</i>           | NM_173437      |                                                                                                             | 0.41 |
| <i>Ncam1</i>          | NM_010875.3    | neural cell adhesion molecule 1 (Ncam1), transcript variant 2                                               | 0.40 |
| <i>Ncan</i>           | NM_007789.2    | neurocan (Ncan)                                                                                             | 0.13 |
| <i>Ncapd2</i>         | NM_146171.1    | non-SMC condensin I complex, subunit D2 (Ncapd2)                                                            | 0.24 |
| <i>Ncapd3</i>         | NM_178113.2    | non-SMC condensin II complex, subunit D3 (Ncapd3)                                                           | 0.45 |
| <i>Ncapg2</i>         | NM_133762.3    | non-SMC condensin II complex, subunit G2 (Ncapg2)                                                           | 0.62 |
| <i>Ncaph</i>          | NM_144818.1    | non-SMC condensin I complex, subunit H (Ncaph)                                                              | 0.16 |
| <i>Ncdn</i>           | NM_011986.2    | neurochondrin (Ncdn)                                                                                        | 0.60 |
| <i>Ncstn</i>          | NM_021607.2    | nicastatin (Ncstn)                                                                                          | 0.58 |
| <i>Ndc80</i>          | NM_023294.1    | NDC80 homolog, kinetochore complex component (S. cerevisiae) (Ndc80)                                        | 0.42 |
| <i>Ndfip1</i>         | NM_022996.1    | Nedd4 family interacting protein 1 (Ndfip1)                                                                 | 0.65 |
| <i>Ndufa12</i>        | NM_025551.3    | NADH dehydrogenase (ubiquinone) 1 alpha subcomplex, 12 (Ndufa12)                                            | 0.64 |
| <i>Ndufa12l</i>       | XM_001476048.1 | PREDICTED: Ndufa12-like (Ndufa12l)                                                                          | 0.66 |
| <i>Ndufa4</i>         | NM_010886.1    | NADH dehydrogenase (ubiquinone) 1 alpha subcomplex, 4 (Ndufa4)                                              | 0.63 |
| <i>Ndufa5</i>         | NM_026614.2    | NADH dehydrogenase (ubiquinone) 1 alpha subcomplex, 5 (Ndufa5), nuclear gene encoding mitochondrial protein | 0.64 |
| <i>Ndufb6</i>         | NM_001033305.1 | NADH dehydrogenase (ubiquinone) 1 beta subcomplex, 6 (Ndufb6)                                               | 0.52 |
| <i>Ndufb8</i>         | NM_026061.2    | NADH dehydrogenase (ubiquinone) 1 beta subcomplex 8 (Ndufb8)                                                | 0.62 |
| <i>Ndufc1</i>         | NM_025523.1    | NADH dehydrogenase (ubiquinone) 1, subcomplex unknown, 1 (Ndufc1)                                           | 0.56 |
| <i>Ndufc2</i>         | NM_024220.1    | NADH dehydrogenase (ubiquinone) 1, subcomplex unknown, 2 (Ndufc2)                                           | 0.51 |
| <i>Ndufs2</i>         | NM_153064.4    | NADH dehydrogenase (ubiquinone) Fe-S protein 2 (Ndufs2)                                                     | 0.58 |
| <i>Ndufs4</i>         | NM_010887.1    | NADH dehydrogenase (ubiquinone) Fe-S protein 4 (Ndufs4), nuclear gene encoding mitochondrial protein        | 0.59 |
| <i>Ndufv2</i>         | NM_028388.1    | NADH dehydrogenase (ubiquinone) flavoprotein 2 (Ndufv2)                                                     | 0.59 |
| <i>Necap1</i>         | NM_026267.1    | NECAP endocytosis associated 1 (Necap1)                                                                     | 0.62 |
| <i>Nedd1</i>          | NM_008682.1    | neural precursor cell expressed, developmentally down-regulated gene 1 (Nedd1)                              | 0.62 |
| <i>Nek3</i>           | NM_011848.2    | NIMA (never in mitosis gene a)-related expressed kinase 3 (Nek3)                                            | 0.60 |
| <i>Neo1</i>           | NM_008684.1    |                                                                                                             | 0.53 |
| <i>Neto2</i>          | NM_001081324.1 | neuropilin (NRP) and tolloid (TLL)-like 2 (Neto2)                                                           | 0.40 |
| <i>Neurl</i>          | NM_021360      |                                                                                                             | 0.21 |
| <i>Nfib</i>           | NM_008687.2    | nuclear factor I/B (Nfib)                                                                                   | 0.56 |
| <i>Nhs1</i>           | NM_173390.3    | NHS-like 1 (Nhs1)                                                                                           | 0.63 |
| <i>Nip7</i>           | NM_025391.1    | nuclear import 7 homolog (S. cerevisiae) (Nip7)                                                             | 0.64 |
| <i>Nipsnap3a</i>      | NM_025623.2    | nipsnap homolog 3A (C. elegans) (Nipsnap3a)                                                                 | 0.54 |

|                 |                |                                                                                                  |      |
|-----------------|----------------|--------------------------------------------------------------------------------------------------|------|
| <i>Nkrf</i>     | NM_029891.2    | NF-kappaB repressing factor (Nkrf)                                                               | 0.57 |
| <i>Nkx2-2</i>   | NM_010919.2    | NK2 transcription factor related, locus 2 (Drosophila) (Nkx2-2), transcript variant 1            | 0.30 |
| <i>Nme1</i>     | NM_008704.2    | non-metastatic cells 1, protein (NM23A) expressed in (Nme1)                                      | 0.43 |
| <i>Nme2</i>     | NM_008705.4    | non-metastatic cells 2, protein (NM23B) expressed in (Nme2), transcript variant 1                | 0.39 |
| <i>Nme4</i>     | NM_019731.1    | non-metastatic cells 4, protein expressed in (Nme4), nuclear gene encoding mitochondrial protein | 0.57 |
| <i>Nmral1</i>   | NM_026393.1    | NmrA-like family domain containing 1 (Nmral1)                                                    | 0.58 |
| <i>Nmt1</i>     | NM_008707.3    | N-myristoyltransferase 1 (Nmt1)                                                                  | 0.63 |
| <i>Nob1</i>     | NM_026277.1    | NIN1/RPN12 binding protein 1 homolog (S. cerevisiae) (Nob1)                                      | 0.62 |
| <i>Noc2l</i>    | NM_021303.2    | nucleolar complex associated 2 homolog (S. cerevisiae) (Noc2l)                                   | 0.57 |
| <i>Noc4l</i>    | NM_153570.2    | nucleolar complex associated 4 homolog (S. cerevisiae) (Noc4l)                                   | 0.57 |
| <i>Nol1</i>     | NM_138747.1    | nucleolar protein 1 (Nol1)                                                                       | 0.59 |
| <i>Nol10</i>    | NM_001008421.1 | nucleolar protein 10 (Nol10)                                                                     | 0.63 |
| <i>Nol5</i>     | NM_018868.2    | nucleolar protein 5 (Nol5)                                                                       | 0.24 |
| <i>Nol5a</i>    | NM_024193.2    | nucleolar protein 5A (Nol5a)                                                                     | 0.47 |
| <i>Nola1</i>    | NM_026578.2    | nucleolar protein family A, member 1 (H/ACA small nucleolar RNPs) (Nola1)                        | 0.40 |
| <i>Nola2</i>    | NM_026631.3    | nucleolar protein family A, member 2 (Nola2)                                                     | 0.49 |
| <i>Nola3</i>    | NM_025403.2    | nucleolar protein family A, member 3 (Nola3)                                                     | 0.48 |
| <i>Nomo1</i>    | NM_153057.3    | nodal modulator 1 (Nomo1)                                                                        | 0.39 |
| <i>Npc2</i>     | NM_023409.4    | Niemann Pick type C2 (Npc2)                                                                      | 0.66 |
| <i>Npm1</i>     | NM_008722.1    | nucleophosmin 1 (Npm1)                                                                           | 0.41 |
| <i>Npm3</i>     | NM_008723.1    | nucleoplasmin 3 (Npm3)                                                                           | 0.25 |
| <i>Npm3-ps1</i> | NR_002702.1    | nucleoplasmin 3, pseudogene 1 (Npm3-ps1), non-coding RNA.                                        | 0.25 |
| <i>Nptn</i>     | NM_009145.1    | neuroplastin (Nptn)                                                                              | 0.45 |
| <i>Nptx1</i>    | NM_008730.2    | neuronal pentraxin 1 (Nptx1)                                                                     | 0.22 |
| <i>Nqo2</i>     | NM_020282.2    | NAD(P)H dehydrogenase, quinone 2 (Nqo2)                                                          | 0.64 |
| <i>Nr2c2ap</i>  | NM_001025587.1 | nuclear receptor 2C2-associated protein (Nr2c2ap), transcript variant 2                          | 0.66 |
| <i>Nrarp</i>    | NM_025980.2    | Notch-regulated ankyrin repeat protein (Nrarp)                                                   | 0.43 |
| <i>Nrm</i>      | NM_134122.2    | nurim (nuclear envelope membrane protein) (Nrm)                                                  | 0.20 |
| <i>Nrn1</i>     | NM_153529.1    | neuritin 1 (Nrn1)                                                                                | 0.42 |
| <i>Nrp1</i>     | NM_008737.1    | neuropilin 1 (Nrp1)                                                                              | 0.35 |
| <i>Nsbp1</i>    | NM_016710.2    | nucleosome binding protein 1 (Nsbp1)                                                             | 0.51 |
| <i>Nsdhl</i>    | NM_010941.3    | NAD(P) dependent steroid dehydrogenase-like (Nsdhl)                                              | 0.53 |
| <i>Nsep1</i>    | NM_011732      |                                                                                                  | 0.41 |
| <i>Nt5dc2</i>   | NM_027289.1    | 5'-nucleotidase domain containing 2 (Nt5dc2)                                                     | 0.50 |
| <i>Nubp1</i>    | NM_011955.1    | nucleotide binding protein 1 (Nubp1)                                                             | 0.48 |
| <i>Nudcd2</i>   | NM_026023.4    | NudC domain containing 2 (Nudcd2)                                                                | 0.58 |
| <i>Nudt21</i>   | NM_026623.3    | nudix (nucleoside diphosphate linked moiety X)-type motif 21 (Nudt21)                            | 0.50 |
| <i>Nudt5</i>    | NM_016918.3    | nudix (nucleoside diphosphate linked moiety X)-type motif 5 (Nudt5)                              | 0.50 |
| <i>Nup133</i>   | NM_172288.1    | nucleoporin 133 (Nup133)                                                                         | 0.64 |
| <i>Nup160</i>   | NM_021512.2    | nucleoporin 160 (Nup160)                                                                         | 0.51 |
| <i>Nup205</i>   | XM_133073.7    | PREDICTED: nucleoporin 205, transcript variant 1 (Nup205)                                        | 0.39 |
| <i>Nup210</i>   | NM_018815.1    | nucleoporin 210 (Nup210)                                                                         | 0.17 |
| <i>Nup43</i>    | NM_145706.1    | nucleoporin 43 (Nup43)                                                                           | 0.48 |
| <i>Nup62</i>    | NM_053074.1    | nucleoporin 62 (Nup62)                                                                           | 0.36 |
| <i>Nup85</i>    | NM_001002929.3 | nucleoporin 85 (Nup85)                                                                           | 0.54 |
| <i>Nup88</i>    | NM_172394.2    | nucleoporin 88 (Nup88), transcript variant 1                                                     | 0.50 |
| <i>Nup93</i>    | NM_172410      |                                                                                                  | 0.66 |
| <i>Nus1</i>     | NM_030250.1    | nuclear undecaprenyl pyrophosphate synthase 1 homolog (S. cerevisiae) (Nus1)                     | 0.57 |
| <i>Nusap1</i>   | NM_001042652.1 | nucleolar and spindle associated protein 1 (Nusap1), transcript variant 2                        | 0.20 |
| <i>Nutf2</i>    | NM_026532.3    | nuclear transport factor 2 (Nutf2)                                                               | 0.59 |
| <i>Nxph1</i>    | NM_008751.2    | neurexophilin 1 (Nxph1)                                                                          | 0.15 |
| <i>Nxt1</i>     | NM_019761.4    | NTF2-related export protein 1 (Nxt1)                                                             | 0.63 |
| <i>Ociad2</i>   | NM_026950.3    | OCIA domain containing 2 (Ociad2)                                                                | 0.40 |
| <i>Ogdh</i>     | NM_010956.3    | oxoglutarate dehydrogenase (lipoamide) (Ogdh), nuclear gene encoding mitochondrial protein       | 0.59 |
| <i>Ola1</i>     | NM_025942.2    | Obg-like ATPase 1 (Ola1), transcript variant 1                                                   | 0.52 |
| <i>Olfm2</i>    | NM_173777.2    | olfactomedin 2 (Olfm2)                                                                           | 0.39 |
| <i>Olfml2b</i>  | NM_177068.3    | olfactomedin-like 2B (Olfml2b)                                                                   | 0.28 |
| <i>Olig1</i>    | NM_016968.4    | oligodendrocyte transcription factor 1 (Olig1)                                                   | 0.24 |
| <i>Omg</i>      | NM_019409.1    | oligodendrocyte myelin glycoprotein (Omg)                                                        | 0.55 |
| <i>Opn3</i>     | NM_010098.2    | opsin 3 (Opn3)                                                                                   | 0.50 |
| <i>Oprs1</i>    | NM_011014.2    | opioid receptor, sigma 1 (Oprs1)                                                                 | 0.56 |
| <i>Orai1</i>    | NM_175423.3    | ORAI calcium release-activated calcium modulator 1 (Orai1)                                       | 0.63 |
| <i>Orc5l</i>    | NM_011959.2    | origin recognition complex, subunit 5-like (S. cerevisiae) (Orc5l)                               | 0.53 |
| <i>Orc6l</i>    | NM_019716.1    | origin recognition complex, subunit 6-like (S. cerevisiae) (Orc6l)                               | 0.47 |
| <i>Osbp16</i>   | NM_145525.2    | oxysterol binding protein-like 6 (Osbp16)                                                        | 0.27 |
| <i>Osbp18</i>   | NM_175489.3    | oxysterol binding protein-like 8 (Osbp18), transcript variant 1                                  | 0.58 |

|                 |                |                                                                                                        |      |
|-----------------|----------------|--------------------------------------------------------------------------------------------------------|------|
| <i>Ostm1</i>    | NM_172416.2    | osteopetrosis associated transmembrane protein 1 (Ostm1)                                               | 0.51 |
| <i>Oxct1</i>    | NM_024188.5    | 3-oxoacid CoA transferase 1 (Oxct1)                                                                    | 0.63 |
| <i>Oxr1</i>     | NM_130885.2    | oxidation resistance 1 (Oxr1), transcript variant 1                                                    | 0.59 |
| <i>P2ry5</i>    | NM_175116.2    | purinergic receptor P2Y, G-protein coupled, 5 (P2ry5)                                                  | 0.32 |
| <i>P4hb</i>     | NM_011032.2    | prolyl 4-hydroxylase, beta polypeptide (P4hb)                                                          | 0.54 |
| <i>Pa2g4</i>    | NM_011119.3    | proliferation-associated 2G4 (Pa2g4)                                                                   | 0.42 |
| <i>Pabpc1</i>   | NM_008774.2    | poly A binding protein, cytoplasmic 1 (Pabpc1)                                                         | 0.60 |
| <i>Pabpc4</i>   | NM_130881.2    | poly A binding protein, cytoplasmic 4 (Pabpc4), transcript variant 1                                   | 0.46 |
| <i>Pabpn1</i>   | NM_019402.1    | poly(A) binding protein, nuclear 1 (Pabpn1)                                                            | 0.52 |
| <i>Pafah1b1</i> | NM_013625.1    | platelet-activating factor acetylhydrolase, isoform 1b, beta1 subunit (Pafah1b1)                       | 0.58 |
| <i>Pafah1b3</i> | NM_008776.1    | platelet-activating factor acetylhydrolase, isoform 1b, alpha1 subunit (Pafah1b3)                      | 0.62 |
| <i>Palmd</i>    | NM_023245.3    | palmdelphin (Palmd)                                                                                    | 0.38 |
| <i>Pank3</i>    | NM_145962.2    | pantothenate kinase 3 (Pank3)                                                                          | 0.54 |
| <i>Papola</i>   | NM_011112.2    | poly (A) polymerase alpha (Papola)                                                                     | 0.61 |
| <i>Parp1</i>    | NM_007415.2    | poly (ADP-ribose) polymerase family, member 1 (Parp1)                                                  | 0.50 |
| <i>Pbk</i>      | NM_023209.1    | PDZ binding kinase (Pbk)                                                                               | 0.08 |
| <i>Pcbp1</i>    | NM_011865.3    | poly(rC) binding protein 1 (Pcbp1)                                                                     | 0.55 |
| <i>Pcdh17</i>   | NM_001013753.1 | protocadherin 17 (Pcdh17)                                                                              | 0.33 |
| <i>Pcdh7</i>    | NM_018764.1    | protocadherin 7 (Pcdh7)                                                                                | 0.44 |
| <i>Pcdh9</i>    | NM_001081377.1 | protocadherin 9 (Pcdh9)                                                                                | 0.45 |
| <i>Pcp4l1</i>   | XM_484933.5    | PREDICTED: Purkinje cell protein 4-like 1 (Pcp4l1)                                                     | 0.64 |
| <i>Pctk1</i>    | NM_011049.4    | PCTAIRE-motif protein kinase 1 (Pctk1)                                                                 | 0.64 |
| <i>Pdap1</i>    | NM_001033313.3 | PDGFA associated protein 1 (Pdap1)                                                                     | 0.28 |
| <i>Pdcd2l</i>   | NM_026549.3    | programmed cell death 2-like (Pdcd2l)                                                                  | 0.65 |
| <i>Pde1b</i>    | NM_008800      |                                                                                                        | 0.66 |
| <i>Pdgfa</i>    | NM_008808      |                                                                                                        | 0.53 |
| <i>Pdha1</i>    | NM_008810.2    | pyruvate dehydrogenase E1 alpha 1 (Pdha1), nuclear gene encoding mitochondrial protein                 | 0.65 |
| <i>Pdhb</i>     | NM_024221.3    | pyruvate dehydrogenase (lipoamide) beta (Pdhb)                                                         | 0.56 |
| <i>Pdia3</i>    | NM_007952.2    | protein disulfide isomerase associated 3 (Pdia3)                                                       | 0.57 |
| <i>Pdia5</i>    | NM_028295.1    | protein disulfide isomerase associated 5 (Pdia5)                                                       | 0.41 |
| <i>Pdk3</i>     | NM_145630.2    | pyruvate dehydrogenase kinase, isoenzyme 3 (Pdk3)                                                      | 0.64 |
| <i>Pdlim4</i>   | NM_019417.2    | PDZ and LIM domain 4 (Pdlim4)                                                                          | 0.53 |
| <i>Pdlim5</i>   | NM_019808.1    | PDZ and LIM domain 5 (Pdlim5), transcript variant 1                                                    | 0.57 |
| <i>Pdss1</i>    | NM_019501.3    | prenyl (solanesyl) diphosphate synthase, subunit 1 (Pdss1)                                             | 0.48 |
| <i>Pdpx</i>     | NM_020271.3    | pyridoxal (pyridoxine, vitamin B6) phosphatase (Pdpx)                                                  | 0.53 |
| <i>Pdzrn4</i>   | XM_001481302.1 | PREDICTED: PDZ domain containing RING finger 4 (Pdzrn4)                                                | 0.33 |
| <i>Peli1</i>    | NM_023324.2    | pellino 1 (Peli1)                                                                                      | 0.49 |
| <i>Pfdn4</i>    | NM_001013369.1 | prefoldin 4 (Pfdn4), transcript variant 2                                                              | 0.32 |
| <i>Pfn1</i>     | NM_011072.2    | profilin 1 (Pfn1)                                                                                      | 0.52 |
| <i>Pgam1</i>    | NM_023418.2    | phosphoglycerate mutase 1 (Pgam1)                                                                      | 0.57 |
| <i>Pgam5</i>    | NM_028273.1    | phosphoglycerate mutase family member 5 (Pgam5)                                                        | 0.44 |
| <i>Pgls</i>     | NM_025396.3    | 6-phosphogluconolactonase (Pgls)                                                                       | 0.57 |
| <i>Pgp</i>      | NM_025954.3    | phosphoglycolate phosphatase (Pgp)                                                                     | 0.29 |
| <i>Phb2</i>     | NM_007531.2    | prohibitin 2 (Phb2)                                                                                    | 0.49 |
| <i>Phc2</i>     | NM_018774.3    | polyhomeotic-like 2 (Drosophila) (Phc2)                                                                | 0.47 |
| <i>Phf20</i>    | NM_172674.2    | PHD finger protein 20 (Phf20)                                                                          | 0.50 |
| <i>Phf5a</i>    | NM_026737.3    | PHD finger protein 5A (Phf5a)                                                                          | 0.60 |
| <i>Phf6</i>     | NM_027642.1    | PHD finger protein 6 (Phf6)                                                                            | 0.54 |
| <i>Phlda1</i>   | NM_009344.1    | pleckstrin homology-like domain, family A, member 1 (Phlda1)                                           | 0.34 |
| <i>Phtf2</i>    | NM_172992.2    | putative homeodomain transcription factor 2 (Phtf2)                                                    | 0.58 |
| <i>Pi4ka</i>    | NM_001001983.1 | phosphatidylinositol 4-kinase, catalytic, alpha polypeptide (Pi4ka)                                    | 0.65 |
| <i>Pif1</i>     | NM_172453.1    | PIF1 5'-to-3' DNA helicase homolog (S. cerevisiae) (Pif1)                                              | 0.37 |
| <i>Piga</i>     | NM_011081.2    | phosphatidylinositol glycan anchor biosynthesis, class A (Piga)                                        | 0.61 |
| <i>Pip4k2a</i>  | NM_008845.4    | phosphatidylinositol-5-phosphate 4-kinase, type II, alpha (Pip4k2a)                                    | 0.66 |
| <i>Pip4k2b</i>  | NM_054051.1    | phosphatidylinositol-5-phosphate 4-kinase, type II, beta (Pip4k2b)                                     | 0.53 |
| <i>Pitrm1</i>   | NM_145131.1    | pitrilysin metallopeptidase 1 (Pitrm1)                                                                 | 0.61 |
| <i>Pja1</i>     | NM_008853.2    | praja1, RING-H2 motif containing (Pja1)                                                                | 0.57 |
| <i>Pja2</i>     | NM_144859.2    | praja 2, RING-H2 motif containing (Pja2), transcript variant 2                                         | 0.61 |
| <i>Pkia</i>     | NM_008862.3    | protein kinase inhibitor, alpha (Pkia)                                                                 | 0.48 |
| <i>Pkm2</i>     | XM_131934.4    |                                                                                                        | 0.50 |
| <i>Pkn2</i>     | NM_178654.3    | protein kinase N2 (Pkn2)                                                                               | 0.63 |
| <i>Plaa</i>     | NM_172695.2    | phospholipase A2, activating protein (Plaa)                                                            | 0.53 |
| <i>Pld1</i>     | XM_130807.1    |                                                                                                        | 0.51 |
| <i>Plekha1</i>  | NM_133942.2    | pleckstrin homology domain containing, family A (phosphoinositide binding specific) member 1 (Plekha1) | 0.63 |
| <i>Plekha8</i>  | NM_001001335.1 | pleckstrin homology domain containing, family A (phosphoinositide binding specific) member 8 (Plekha8) | 0.63 |
| <i>Plekhh1</i>  | NM_133244.2    |                                                                                                        | 0.23 |



|                 |                |                                                                                                  |      |
|-----------------|----------------|--------------------------------------------------------------------------------------------------|------|
| <i>Plk1</i>     | NM_011121.3    | polo-like kinase 1 (Drosophila) (Plk1)                                                           | 0.11 |
| <i>Plk2</i>     | NM_152804.1    | polo-like kinase 2 (Drosophila) (Plk2)                                                           | 0.29 |
| <i>Plk4</i>     | NM_011495.1    |                                                                                                  | 0.57 |
| <i>Plvap</i>    | NM_032398.1    | plasmalemma vesicle associated protein (Plvap)                                                   | 0.13 |
| <i>Plxnd1</i>   | NM_026376.3    | plexin D1 (Plxnd1)                                                                               | 0.54 |
| <i>Pmp22</i>    | NM_008885.2    | peripheral myelin protein 22 (Pmp22)                                                             | 0.51 |
| <i>Pno1</i>     | NM_025443.2    | partner of NOB1 homolog (S. cerevisiae) (Pno1)                                                   | 0.41 |
| <i>Pola2</i>    | NM_008893.2    | polymerase (DNA directed), alpha 2 (Pola2)                                                       | 0.64 |
| <i>Pold1</i>    | NM_011131.2    | polymerase (DNA directed), delta 1, catalytic subunit (Pold1)                                    | 0.33 |
| <i>Pold2</i>    | NM_008894.1    | polymerase (DNA directed), delta 2, regulatory subunit (Pold2)                                   | 0.56 |
| <i>Pold4</i>    | NM_027196      |                                                                                                  | 0.61 |
| <i>Pole</i>     | NM_011132.1    | polymerase (DNA directed), epsilon (Pole)                                                        | 0.45 |
| <i>Pole4</i>    | NM_025882.3    | polymerase (DNA-directed), epsilon 4 (p12 subunit) (Pole4)                                       | 0.60 |
| <i>Polg</i>     | NM_017462.2    | polymerase (DNA directed), gamma (Polg)                                                          | 0.58 |
| <i>Polr1a</i>   | NM_009088.2    | polymerase (RNA) I polypeptide A (Polr1a)                                                        | 0.58 |
| <i>Polr1d</i>   | NM_009087.1    | polymerase (RNA) I polypeptide D (Polr1d), transcript variant 1                                  | 0.64 |
| <i>Polr1e</i>   | NM_022811.2    | polymerase (RNA) I polypeptide E (Polr1e)                                                        | 0.60 |
| <i>Polr2g</i>   | NM_026329.2    | polymerase (RNA) II (DNA directed) polypeptide G (Polr2g)                                        | 0.67 |
| <i>Polr2h</i>   | NM_145632.1    | polymerase (RNA) II (DNA directed) polypeptide H (Polr2h)                                        | 0.66 |
| <i>Polr3k</i>   | NM_025901.2    | polymerase (RNA) III (DNA directed) polypeptide K (Polr3k)                                       | 0.60 |
| <i>Pop5</i>     | NM_026398.2    | processing of precursor 5, ribonuclease P/MRP family (S. cerevisiae) (Pop5)                      | 0.60 |
| <i>Pou3f1</i>   | NM_011141.2    | POU domain, class 3, transcription factor 1 (Pou3f1)                                             | 0.19 |
| <i>Ppa1</i>     | NM_026438.2    | pyrophosphatase (inorganic) 1 (Ppa1)                                                             | 0.48 |
| <i>Ppa2</i>     | NM_146141.1    | pyrophosphatase (inorganic) 2 (Ppa2), nuclear gene encoding mitochondrial protein                | 0.61 |
| <i>Ppan</i>     | NM_145610      |                                                                                                  | 0.48 |
| <i>Ppat</i>     | XM_001002886.2 | PREDICTED: phosphoribosyl pyrophosphate amidotransferase, transcript variant 8 (Ppat)            | 0.61 |
| <i>Ppia</i>     | NM_008907.1    | peptidylprolyl isomerase A (Ppia)                                                                | 0.54 |
| <i>Ppic</i>     | NM_008908.1    | peptidylprolyl isomerase C (Ppic)                                                                | 0.35 |
| <i>Ppid</i>     | NM_026352.2    |                                                                                                  | 0.61 |
| <i>Ppif</i>     | NM_134084.1    | peptidylprolyl isomerase F (cyclophilin F) (Ppif), nuclear gene encoding mitochondrial protein   | 0.47 |
| <i>Ppih</i>     | NM_028677      |                                                                                                  | 0.51 |
| <i>Ppm1b</i>    | NM_011151.1    | protein phosphatase 1B, magnesium dependent, beta isoform (Ppm1b)                                | 0.64 |
| <i>Ppm1g</i>    | NM_008014.3    | protein phosphatase 1G (formerly 2C), magnesium-dependent, gamma isoform (Ppm1g)                 | 0.62 |
| <i>Ppp1ca</i>   | NM_031868.2    | protein phosphatase 1, catalytic subunit, alpha isoform (Ppp1ca)                                 | 0.65 |
| <i>Ppp1r10</i>  | NM_175934.2    | protein phosphatase 1, regulatory subunit 10 (Ppp1r10)                                           | 0.62 |
| <i>Ppp1r12a</i> | NM_027892.2    | protein phosphatase 1, regulatory (inhibitor) subunit 12A (Ppp1r12a)                             | 0.44 |
| <i>Ppp1r14b</i> | NM_008889.1    |                                                                                                  | 0.54 |
| <i>Ppp1r8</i>   | NM_146154.1    | protein phosphatase 1, regulatory (inhibitor) subunit 8 (Ppp1r8)                                 | 0.65 |
| <i>Ppp1r9b</i>  | NM_172261.2    | protein phosphatase 1, regulatory subunit 9B (Ppp1r9b)                                           | 0.60 |
| <i>Ppp2cb</i>   | NM_017374.3    | protein phosphatase 2 (formerly 2A), catalytic subunit, beta isoform (Ppp2cb)                    | 0.59 |
| <i>Ppp2r2d</i>  | NM_026391.2    | protein phosphatase 2, regulatory subunit B, delta isoform (Ppp2r2d)                             | 0.64 |
| <i>Ppp2r5c</i>  | NM_001081458.1 | protein phosphatase 2, regulatory subunit B (B56), gamma isoform (Ppp2r5c), transcript variant 3 | 0.51 |
| <i>Ppp3cb</i>   | NM_008914      |                                                                                                  | 0.46 |
| <i>Ppp3r1</i>   | NM_024459.2    | protein phosphatase 3, regulatory subunit B, alpha isoform (calcineurin B, type I) (Ppp3r1)      | 0.66 |
| <i>Ppp4r1</i>   | NM_146081.1    | protein phosphatase 4, regulatory subunit 1 (Ppp4r1)                                             | 0.64 |
| <i>Ppp6c</i>    | NM_024209.2    | protein phosphatase 6, catalytic subunit (Ppp6c)                                                 | 0.57 |
| <i>Pprc1</i>    | NM_001081214.1 | peroxisome proliferative activated receptor, gamma, coactivator-related 1 (Pprc1)                | 0.54 |
| <i>Prc1</i>     | NM_145150.1    | protein regulator of cytokinesis 1 (Prc1)                                                        | 0.06 |
| <i>Prpcp</i>    | NM_028243.2    | prolylcarboxypeptidase (angiotensinase C) (Prpcp)                                                | 0.36 |
| <i>Prdx4</i>    | NM_016764.3    | peroxiredoxin 4 (Prdx4)                                                                          | 0.63 |
| <i>Prep</i>     | NM_011156.2    | prolyl endopeptidase (Prep)                                                                      | 0.48 |
| <i>Prkaca</i>   | NM_008854.3    | protein kinase, cAMP dependent, catalytic, alpha (Prkaca)                                        | 0.54 |
| <i>Prkacb</i>   | NM_011100.3    | protein kinase, cAMP dependent, catalytic, beta (Prkacb)                                         | 0.46 |
| <i>Prkar2b</i>  | NM_011158.3    | protein kinase, cAMP dependent regulatory, type II beta (Prkar2b)                                | 0.40 |
| <i>Prkcb</i>    | NM_008855.1    |                                                                                                  | 0.15 |
| <i>Prkcbp1</i>  | NM_027230.3    | protein kinase C binding protein 1 (Prkcbp1)                                                     | 0.67 |
| <i>Prkcsh</i>   | NM_008925.1    | protein kinase C substrate 80K-H (Prkcsh)                                                        | 0.56 |
| <i>Prkd3</i>    | NM_029239.2    | protein kinase D3 (Prkd3)                                                                        | 0.50 |
| <i>Prkg1</i>    | NM_011160      |                                                                                                  | 0.55 |
| <i>Prmt3</i>    | NM_133740.1    | protein arginine N-methyltransferase 3 (Prmt3)                                                   | 0.54 |

|                 |                |                                                                                                                   |      |
|-----------------|----------------|-------------------------------------------------------------------------------------------------------------------|------|
| <i>Prmt5</i>    | NM_013768.2    | protein arginine N-methyltransferase 5 (Prmt5)                                                                    | 0.59 |
| <i>Prmt7</i>    | NM_145404.1    | protein arginine N-methyltransferase 7 (Prmt7)                                                                    | 0.47 |
| <i>Prokr1</i>   | NM_021381.3    | prokineticin receptor 1 (Prokr1)                                                                                  | 0.46 |
| <i>Prpf19</i>   | NM_134129.2    | PRP19/PSO4 pre-mRNA processing factor 19 homolog ( <i>S. cerevisiae</i> ) (Prpf19)                                | 0.57 |
| <i>Prpf38a</i>  | NM_172697.1    | PRP38 pre-mRNA processing factor 38 (yeast) domain containing A (Prpf38a)                                         | 0.60 |
| <i>Prpf40a</i>  | NM_018785.2    | PRP40 pre-mRNA processing factor 40 homolog A (yeast) (Prpf40a)                                                   | 0.59 |
| <i>Prr18</i>    | NM_178774.3    | proline rich region 18 (Prr18)                                                                                    | 0.33 |
| <i>Prrc1</i>    | NM_028447.2    | proline-rich coiled-coil 1 (Prrc1)                                                                                | 0.63 |
| <i>Prss35</i>   | NM_178738.2    | protease, serine, 35 (Prss35)                                                                                     | 0.18 |
| <i>Psip1</i>    | NM_133948.4    | PC4 and SFRS1 interacting protein 1 (Psip1)                                                                       | 0.64 |
| <i>Psma5</i>    | NM_011967.2    | proteasome (prosome, macropain) subunit, alpha type 5 (Psma5)                                                     | 0.59 |
| <i>Psma7</i>    | NM_011969.1    | proteasome (prosome, macropain) subunit, alpha type 7 (Psma7)                                                     | 0.64 |
| <i>Psemb10</i>  | NM_013640.2    | proteasome (prosome, macropain) subunit, beta type 10 (Psemb10)                                                   | 0.56 |
| <i>Psemb2</i>   | NM_011970.2    | proteasome (prosome, macropain) subunit, beta type 2 (Psemb2)                                                     | 0.62 |
| <i>Psemb4</i>   | NM_008945.2    | proteasome (prosome, macropain) subunit, beta type 4 (Psemb4)                                                     | 0.61 |
| <i>Psemb7</i>   | NM_011187.1    | proteasome (prosome, macropain) subunit, beta type 7 (Psemb7)                                                     | 0.66 |
| <i>Psmc1</i>    | NM_008947      |                                                                                                                   | 0.60 |
| <i>Psmc3ip</i>  | NM_008949.2    | proteasome (prosome, macropain) 26S subunit, ATPase 3, interacting protein (Psmc3ip)                              | 0.58 |
| <i>Psmc5</i>    | NM_008950.1    | protease (prosome, macropain) 26S subunit, ATPase 5 (Psmc5)                                                       | 0.65 |
| <i>Psmc1</i>    | NM_027357.2    | proteasome (prosome, macropain) 26S subunit, non-ATPase, 1 (Psmc1)                                                | 0.56 |
| <i>Psmc12</i>   | NM_025894.1    | proteasome (prosome, macropain) 26S subunit, non-ATPase, 12 (Psmc12)                                              | 0.56 |
| <i>Psmc14</i>   | NM_021526.1    | proteasome (prosome, macropain) 26S subunit, non-ATPase, 14 (Psmc14)                                              | 0.64 |
| <i>Psmc8</i>    | NM_026545.2    | proteasome (prosome, macropain) 26S subunit, non-ATPase, 8 (Psmc8)                                                | 0.67 |
| <i>Psmc3</i>    | NM_011192.3    | proteasome (prosome, macropain) 28 subunit, 3 (Psmc3)                                                             | 0.59 |
| <i>Ptcd2</i>    | NM_026873.2    | pentatricopeptide repeat domain 2 (Ptcd2)                                                                         | 0.66 |
| <i>Pten</i>     | NM_008960.2    | phosphatase and tensin homolog (Pten)                                                                             | 0.66 |
| <i>Ptk2</i>     | NM_007982.1    | PTK2 protein tyrosine kinase 2 (Ptk2)                                                                             | 0.36 |
| <i>Ptn</i>      | NM_008973.2    | pleiotrophin (Ptn)                                                                                                | 0.28 |
| <i>Ptp4a2</i>   | NM_008974.3    | protein tyrosine phosphatase 4a2 (Ptp4a2)                                                                         | 0.62 |
| <i>Ptpla</i>    | NM_001012396.2 | protein tyrosine phosphatase-like (proline instead of catalytic arginine), member a (Ptpla), transcript variant 2 | 0.61 |
| <i>Ptpn12</i>   | NM_011203.2    | protein tyrosine phosphatase, non-receptor type 12 (Ptpn12)                                                       | 0.61 |
| <i>Ptpre</i>    | NM_011212.3    | protein tyrosine phosphatase, receptor type, E (Ptpre)                                                            | 0.53 |
| <i>Ptpm</i>     | NM_008984      |                                                                                                                   | 0.65 |
| <i>Ptpro</i>    | NM_011216.2    | protein tyrosine phosphatase, receptor type, O (Ptpro)                                                            | 0.28 |
| <i>Ptprz1</i>   | XM_988289.1    | PREDICTED: protein tyrosine phosphatase, receptor type Z, polypeptide 1, transcript variant 3 (Ptprz1)            | 0.19 |
| <i>Pum2</i>     | NM_030723.1    | pumilio 2 ( <i>Drosophila</i> ) (Pum2)                                                                            | 0.64 |
| <i>Purb</i>     | NM_011221.2    | purine rich element binding protein B (Purb)                                                                      | 0.64 |
| <i>Pus7l</i>    | NM_172437.2    | pseudouridylate synthase 7 homolog ( <i>S. cerevisiae</i> )-like (Pus7l)                                          | 0.41 |
| <i>Pusl1</i>    | XM_001476573.1 | PREDICTED: pseudouridylate synthase-like 1, transcript variant 1 (Pusl1)                                          | 0.53 |
| <i>Pvrl3</i>    | NM_021495.2    | poliovirus receptor-related 3 (Pvrl3), transcript variant alpha                                                   | 0.55 |
| <i>Pycr2</i>    | NM_133705.1    | pyrroline-5-carboxylate reductase family, member 2 (Pycr2)                                                        | 0.58 |
| <i>Qpct</i>     | NM_027455.1    | glutaminyl-peptide cyclotransferase (glutaminyl cyclase) (Qpct)                                                   | 0.43 |
| <i>Qrs1</i>     | NM_001081054.2 | glutaminyl-tRNA synthase (glutamine-hydrolyzing)-like 1 (Qrs1)                                                    | 0.56 |
| <i>R3hdm1</i>   | NM_181750.2    | R3H domain 1 (binds single-stranded nucleic acids) (R3hdm1)                                                       | 0.67 |
| <i>Rab26</i>    | XM_283428.6    | PREDICTED: RAB26, member RAS oncogene family, transcript variant 1 (Rab26)                                        | 0.06 |
| <i>Rab31</i>    | NM_133685.1    | RAB31, member RAS oncogene family (Rab31)                                                                         | 0.64 |
| <i>Rab34</i>    | NM_033475.2    | RAB34, member of RAS oncogene family (Rab34)                                                                      | 0.53 |
| <i>Rab35</i>    | NM_198163.1    | RAB35, member RAS oncogene family (Rab35)                                                                         | 0.61 |
| <i>Rab3a</i>    | NM_009001.3    | RAB3A, member RAS oncogene family (Rab3a)                                                                         | 0.50 |
| <i>Rab3b</i>    | NM_023537.4    |                                                                                                                   | 0.36 |
| <i>Rab3gap2</i> | XM_980542.1    | PREDICTED: RAB3 GTPase activating protein subunit 2, transcript variant 4 (Rab3gap2)                              | 0.55 |
| <i>Rab5c</i>    | NM_024456.2    | RAB5C, member RAS oncogene family (Rab5c)                                                                         | 0.65 |
| <i>Rab8b</i>    | NM_173413.2    | RAB8B, member RAS oncogene family (Rab8b)                                                                         | 0.43 |
| <i>Rabggtb</i>  | NM_011231.1    | RAB geranylgeranyl transferase, b subunit (Rabggtb)                                                               | 0.53 |
| <i>Rabif</i>    | NM_145510.1    | RAB interacting factor (Rabif)                                                                                    | 0.63 |
| <i>Rabl3</i>    | NM_026297.1    |                                                                                                                   | 0.63 |
| <i>Rad51</i>    | NM_011234.2    | RAD51 homolog ( <i>S. cerevisiae</i> ) (Rad51)                                                                    | 0.56 |
| <i>Rad51c</i>   | NM_053269.2    | Rad51 homolog c ( <i>S. cerevisiae</i> ) (Rad51c)                                                                 | 0.47 |
| <i>Rad54l</i>   | NM_009015.2    | RAD54 like ( <i>S. cerevisiae</i> ) (Rad54l)                                                                      | 0.49 |
| <i>Raet1b</i>   | NM_009017.1    | retinoic acid early transcript beta (Raet1b)                                                                      | 0.34 |
| <i>Raly</i>     | NM_023130.2    | hnRNP-associated with lethal yellow (Raly)                                                                        | 0.36 |
| <i>Ramp2</i>    | NM_019444.2    | receptor (calcitonin) activity modifying protein 2 (Ramp2)                                                        | 0.55 |
| <i>Ran</i>      | NM_009391.3    | RAN, member RAS oncogene family (Ran)                                                                             | 0.59 |
| <i>Ranbp1</i>   | NM_011239.2    | RAN binding protein 1 (Ranbp1)                                                                                    | 0.39 |

|                 |                |                                                                                         |      |
|-----------------|----------------|-----------------------------------------------------------------------------------------|------|
| <i>Rangap1</i>  | NM_011241      |                                                                                         | 0.52 |
| <i>Rangrf</i>   | NM_021329.2    | RAN guanine nucleotide release factor (Rangrf)                                          | 0.54 |
| <i>Rap1b</i>    | NM_024457.2    | RAS related protein 1b (Rap1b)                                                          | 0.52 |
| <i>Rap1gap</i>  | NM_001081155.1 | Rap1 GTPase-activating protein (Rap1gap)                                                | 0.66 |
| <i>Rap2c</i>    | NM_172413.2    | RAP2C, member of RAS oncogene family (Rap2c)                                            | 0.27 |
| <i>Rasa1</i>    | NM_145452.2    | RAS p21 protein activator 1 (Rasa1)                                                     | 0.51 |
| <i>Rasa3</i>    | NM_009025.2    | RAS p21 protein activator 3 (Rasa3)                                                     | 0.29 |
| <i>Rasal2</i>   | NM_177644.4    | RAS protein activator like 2 (Rasal2)                                                   | 0.50 |
| <i>Rasl11b</i>  | NM_026878.1    | RAS-like, family 11, member B (Rasl11b)                                                 | 0.66 |
| <i>Rassf3</i>   | NM_138956.3    | Ras association (RalGDS/AF-6) domain family member 3 (Rassf3)                           | 0.20 |
| <i>Rbbp4</i>    | NM_009030.3    | retinoblastoma binding protein 4 (Rbbp4)                                                | 0.60 |
| <i>Rbbp7</i>    | NM_009031.2    | retinoblastoma binding protein 7 (Rbbp7)                                                | 0.58 |
| <i>Rbl1</i>     | NM_011249.1    | retinoblastoma-like 1 (p107) (Rbl1)                                                     | 0.41 |
| <i>Rbm13</i>    | NM_026453.1    | RNA binding motif protein 13 (Rbm13)                                                    | 0.41 |
| <i>Rbms3</i>    | NM_178660.2    | RNA binding motif, single stranded interacting protein (Rbms3)                          | 0.60 |
| <i>Rbmx</i>     | NM_011252.2    | RNA binding motif protein, X chromosome (Rbmx)                                          | 0.32 |
| <i>Rbx1</i>     | NM_019712.3    | ring-box 1 (Rbx1)                                                                       | 0.62 |
| <i>Rcc1</i>     | NM_133878.2    | regulator of chromosome condensation 1 (Rcc1)                                           | 0.56 |
| <i>Rcl1</i>     | NM_021525.2    | RNA terminal phosphate cyclase-like 1 (Rcl1)                                            | 0.62 |
| <i>Rdh11</i>    | NM_021557      |                                                                                         | 0.48 |
| <i>Reep3</i>    | NM_178606.4    | receptor accessory protein 3 (Reep3)                                                    | 0.52 |
| <i>Reps1</i>    | NM_009048.1    | RalBP1 associated Eps domain containing protein (Reps1)                                 | 0.48 |
| <i>Rerg</i>     | NM_181988.1    | RAS-like, estrogen-regulated, growth-inhibitor (Rerg)                                   | 0.33 |
| <i>Rev3l</i>    | NM_011264.3    | REV3-like, catalytic subunit of DNA polymerase zeta RAD54 like (S. cerevisiae) (Rev3l)  | 0.44 |
| <i>Rfc1</i>     | NM_011258.1    | replication factor C (activator 1) 1 (Rfc1)                                             | 0.64 |
| <i>Rfc2</i>     | NM_020022      |                                                                                         | 0.63 |
| <i>Rfc3</i>     | XM_132528.3    |                                                                                         | 0.64 |
| <i>Rfc4</i>     | NM_145480      |                                                                                         | 0.36 |
| <i>Rfc5</i>     | NM_028128.1    | replication factor C (activator 1) 5 (Rfc5)                                             | 0.53 |
| <i>Rg9mtd1</i>  | NM_029092.2    | RNA (guanine-9-) methyltransferase domain containing 1 (Rg9mtd1)                        | 0.66 |
| <i>Rgs10</i>    | NM_026418.2    | regulator of G-protein signalling 10 (Rgs10)                                            | 0.66 |
| <i>Rgs7</i>     | NM_011880.2    | regulator of G protein signaling 7 (Rgs7)                                               | 0.26 |
| <i>Rgs7bp</i>   | NM_029879.2    | regulator of G-protein signalling 7 binding protein (Rgs7bp)                            | 0.41 |
| <i>Rhbdf1</i>   | NM_010117.1    | rhomboid family 1 (Drosophila) (Rhbdf1)                                                 | 0.55 |
| <i>Rhobtb1</i>  | NM_001081347.1 | Rho-related BTB domain containing 1 (Rhobtb1)                                           | 0.62 |
| <i>Rhobtb2</i>  | NM_153514.4    | Rho-related BTB domain containing 2 (Rhobtb2)                                           | 0.66 |
| <i>Rhoc</i>     | NM_007484.1    | ras homolog gene family, member C (Rhoc)                                                | 0.58 |
| <i>Rhot1</i>    | NM_021536.6    | ras homolog gene family, member T1 (Rhot1)                                              | 0.65 |
| <i>Rhot2</i>    | NM_145999.2    | ras homolog gene family, member T2 (Rhot2), nuclear gene encoding mitochondrial protein | 0.63 |
| <i>Riok3</i>    | NM_024182.4    | RIO kinase 3 (yeast) (Riok3)                                                            | 0.66 |
| <i>Rnaseh2b</i> | NM_026001.2    | ribonuclease H2, subunit B (Rnaseh2b)                                                   | 0.45 |
| <i>Rnf14</i>    | NM_020012.1    | ring finger protein 14 (Rnf14)                                                          | 0.65 |
| <i>Rnf145</i>   | NM_028862.2    | ring finger protein 145 (Rnf145)                                                        | 0.66 |
| <i>Rnf26</i>    | NM_153762.3    | ring finger protein 26 (Rnf26)                                                          | 0.46 |
| <i>Rnf4</i>     | NM_011278.1    | ring finger protein 4 (Rnf4)                                                            | 0.59 |
| <i>Rnf44</i>    | NM_134064.1    | ring finger protein 44 (Rnf44)                                                          | 0.52 |
| <i>Rnps1</i>    | NM_001080127.1 | ribonucleic acid binding protein S1 (Rnps1), transcript variant 2                       | 0.48 |
| <i>Rnu65</i>    |                |                                                                                         | 0.66 |
| <i>Robo1</i>    | NM_019413.2    | roundabout homolog 1 (Drosophila) (Robo1)                                               | 0.44 |
| <i>Rock2</i>    | NM_009072.2    | Rho-associated coiled-coil containing protein kinase 2 (Rock2)                          | 0.62 |
| <i>Rorb</i>     | NM_001043354.1 | RAR-related orphan receptor beta (Rorb), transcript variant 1                           | 0.66 |
| <i>Rpa3</i>     | NM_026632.3    | replication protein A3 (Rpa3)                                                           | 0.43 |
| <i>Rpl10a</i>   | NM_011287.1    | ribosomal protein L10A (Rpl10a)                                                         | 0.45 |
| <i>Rpl12</i>    | NM_009076.1    | ribosomal protein L12 (Rpl12)                                                           | 0.37 |
| <i>Rpl13a</i>   | NM_009438.3    | ribosomal protein L13a (Rpl13a)                                                         | 0.27 |
| <i>Rpl18</i>    | NM_009077.2    | ribosomal protein L18 (Rpl18)                                                           | 0.43 |
| <i>Rpl18a</i>   | NM_029751.3    | Ribosomal protein L18A (Rpl18a)                                                         | 0.47 |
| <i>Rpl19</i>    | NM_009078.1    | ribosomal protein L19 (Rpl19)                                                           | 0.44 |
| <i>Rpl23</i>    | NM_022891.2    | ribosomal protein L23 (Rpl23)                                                           | 0.61 |
| <i>Rpl24</i>    | NM_024218.2    | ribosomal protein L24 (Rpl24)                                                           | 0.65 |
| <i>Rpl26</i>    | NM_009080.2    | ribosomal protein L26 (Rpl26)                                                           | 0.58 |
| <i>Rpl27</i>    | NM_011289.1    | ribosomal protein L27 (Rpl27)                                                           | 0.45 |
| <i>Rpl27a</i>   | NM_011975.3    | ribosomal protein L27a (Rpl27a)                                                         | 0.36 |
| <i>Rpl28</i>    | NM_009081      |                                                                                         | 0.46 |
| <i>Rpl29</i>    | NM_009082.2    | ribosomal protein L29 (Rpl29)                                                           | 0.46 |
| <i>Rpl30</i>    | NM_009083.2    | ribosomal protein L30 (Rpl30)                                                           | 0.60 |
| <i>Rpl31</i>    | NM_053257.1    | ribosomal protein L31 (Rpl31)                                                           | 0.36 |
| <i>Rpl32</i>    | NM_172086      |                                                                                         | 0.52 |
| <i>Rpl34</i>    | NM_026724.1    | ribosomal protein L34 (Rpl34), transcript variant 1                                     | 0.54 |

|                          |                |                                                                               |      |
|--------------------------|----------------|-------------------------------------------------------------------------------|------|
| <i>Rpl35</i>             | NM_025592.3    | ribosomal protein L35 (Rpl35)                                                 | 0.49 |
| <i>Rpl36a</i>            | NM_019865.2    | ribosomal protein L36a (Rpl36a)                                               | 0.35 |
| <i>Rpl36al</i>           | NM_025589.1    | ribosomal protein L36a-like (Rpl36al)                                         | 0.45 |
| <i>Rpl37</i>             | NM_026069.2    | ribosomal protein L37 (Rpl37)                                                 | 0.56 |
| <i>Rpl39</i>             | NM_026055.1    | ribosomal protein L39 (Rpl39)                                                 | 0.56 |
| <i>Rpl4</i>              | NM_024212.2    | ribosomal protein L4 (Rpl4)                                                   | 0.33 |
| <i>Rpl9</i>              | NM_011292.1    | ribosomal protein L9 (Rpl9)                                                   | 0.58 |
| <i>Rplp0</i>             | NM_007475.4    | ribosomal protein, large, P0 (Rplp0)                                          | 0.51 |
| <i>Rplp1</i>             | NM_018853.3    | ribosomal protein, large, P1 (Rplp1)                                          | 0.57 |
| <i>Rplp2</i>             | NM_026020.4    | ribosomal protein, large P2 (Rplp2)                                           | 0.47 |
| <i>Rpn2</i>              | NM_019642.3    | ribophorin II (Rpn2)                                                          | 0.54 |
| <i>Rprm</i>              | NM_023396.4    | reprimo, TP53 dependent G2 arrest mediator candidate (Rprm)                   | 0.46 |
| <i>Rps10</i>             | NM_025963.1    | ribosomal protein S10 (Rps10)                                                 | 0.54 |
| <i>Rps11</i>             | NM_013725.3    | ribosomal protein S11 (Rps11)                                                 | 0.55 |
| <i>Rps12</i>             | NM_011295.2    |                                                                               | 0.44 |
| <i>Rps13</i>             | NM_026533.1    | ribosomal protein S13 (Rps13)                                                 | 0.46 |
| <i>Rps15</i>             | NM_009091.1    | ribosomal protein S15 (Rps15)                                                 | 0.50 |
| <i>Rps16</i>             | NM_013647.1    | ribosomal protein S16 (Rps16)                                                 | 0.42 |
| <i>Rps19</i>             | NM_023133.1    | ribosomal protein S19 (Rps19)                                                 | 0.62 |
| <i>Rps2</i>              | NM_008503.4    | ribosomal protein S2 (Rps2)                                                   | 0.52 |
| <i>Rps24</i>             | NM_011297.2    | ribosomal protein S24 (Rps24), transcript variant 1                           | 0.61 |
| <i>Rps25</i>             | NM_024266.3    | ribosomal protein S25 (Rps25)                                                 | 0.50 |
| <i>Rps26</i>             | NM_013765.1    | ribosomal protein S26 (Rps26)                                                 | 0.38 |
| <i>Rps27a</i>            | NM_001033865.1 | ribosomal protein S27a (Rps27a), transcript variant 2                         | 0.48 |
| <i>Rps27l</i>            | NM_026467.2    | ribosomal protein S27-like (Rps27l)                                           | 0.64 |
| <i>Rps29</i>             | NM_009093.1    | ribosomal protein S29 (Rps29)                                                 | 0.61 |
| <i>Rps3</i>              | NM_012052.1    |                                                                               | 0.51 |
| <i>Rps3a</i>             | NM_016959.2    | ribosomal protein S3a (Rps3a)                                                 | 0.56 |
| <i>Rps4x</i>             | NM_009094.1    | ribosomal protein S4, X-linked (Rps4x)                                        | 0.45 |
| <i>Rps5</i>              | NM_009095.1    | ribosomal protein S5 (Rps5)                                                   | 0.43 |
| <i>Rps6</i>              | NM_009096.2    | ribosomal protein S6 (Rps6)                                                   | 0.53 |
| <i>Rps6ka1</i>           | NM_009097.1    | ribosomal protein S6 kinase polypeptide 1 (Rps6ka1)                           | 0.55 |
| <i>Rps7</i>              | NM_011300.2    | ribosomal protein S7 (Rps7)                                                   | 0.49 |
| <i>Rps8</i>              | NM_009098.2    | ribosomal protein S8 (Rps8)                                                   | 0.40 |
| <i>Rps9</i>              | NM_029767.2    | ribosomal protein S9 (Rps9)                                                   | 0.61 |
| <i>Rrbp1</i>             | NM_133626.2    | ribosome binding protein 1 (Rrbp1), transcript variant 2                      | 0.22 |
| <i>Rrm1</i>              | NM_009103.2    | ribonucleotide reductase M1 (Rrm1)                                            | 0.33 |
| <i>Rrm2</i>              | NM_009104.1    | ribonucleotide reductase M2 (Rrm2)                                            | 0.30 |
| <i>Rrn3</i>              | NM_001039521.1 | RRN3 RNA polymerase I transcription factor homolog (yeast) (Rrn3)             | 0.62 |
| <i>Rrp15</i>             | NM_026041.2    | ribosomal RNA processing 15 homolog (S. cerevisiae) (Rrp15)                   | 0.55 |
| <i>Rrp1b</i>             | NM_028244.1    | ribosomal RNA processing 1 homolog B (S. cerevisiae) (Rrp1b)                  | 0.66 |
| <i>Rsl1d1</i>            | NM_025546.2    | ribosomal L1 domain containing 1 (Rsl1d1)                                     | 0.52 |
| <i>Rtkn2</i>             | NM_001081346.1 | rhotekin 2 (Rtkn2)                                                            | 0.50 |
| <i>Rtn3</i>              | NM_001003934.1 | reticulon 3 (Rtn3), transcript variant 1                                      | 0.63 |
| <i>Rtn4ip1</i>           | NM_130892.2    | reticulon 4 interacting protein 1 (Rtn4ip1)                                   | 0.66 |
| <i>Rtn4r11</i>           | NM_177708.5    | reticulon 4 receptor-like 1 (Rtn4r11)                                         | 0.53 |
| <i>Ruvbl2</i>            | NM_011304.3    | RuvB-like protein 2 (Ruvbl2)                                                  | 0.65 |
| <i>Rwdd1</i>             | NM_025614.1    | RWD domain containing 1 (Rwdd1)                                               | 0.61 |
| <i>Rybp</i>              | NM_019743.3    | RING1 and YY1 binding protein (Rybp)                                          | 0.63 |
| <i>Ryk</i>               | NM_001042607.1 | receptor-like tyrosine kinase (Ryk), transcript variant 2                     | 0.46 |
| <i>Sacm1l</i>            | NM_030692.1    | SAC1 (suppressor of actin mutations 1, homolog)-like (S. cerevisiae) (Sacm1l) | 0.55 |
| <i>Sae1</i>              | NM_019748.2    | SUMO1 activating enzyme subunit 1 (Sae1)                                      | 0.55 |
| <i>Sall3</i>             | NM_178280.3    | sal-like 3 (Drosophila) (Sall3)                                               | 0.54 |
| <i>Sap30</i>             | NM_021788.1    | sin3 associated polypeptide (Sap30)                                           | 0.42 |
| <i>Saps3</i>             | NM_029456.1    | SAPS domain family, member 3 (Saps3)                                          | 0.66 |
| <i>Satb1</i>             | NM_009122.1    | special AT-rich sequence binding protein 1 (Satb1)                            | 0.43 |
| <i>Sav1</i>              | NM_022028.2    | salvador homolog 1 (Drosophila) (Sav1)                                        | 0.65 |
| <i>Sbk</i>               | NM_145587.1    |                                                                               | 0.57 |
| <i>Sc4mol</i>            | NM_025436.1    | sterol-C4-methyl oxidase-like (Sc4mol)                                        | 0.58 |
| <i>Scamp4</i>            | NM_019575.4    | secretory carrier membrane protein 4 (Scamp4)                                 | 0.59 |
| <i>Scara3</i>            | NM_172604.3    | scavenger receptor class A, member 3 (Scara3)                                 | 0.52 |
| <i>Scara5</i>            | NM_028903.1    | scavenger receptor class A, member 5 (putative) (Scara5)                      | 0.54 |
| <i>Scd1</i>              | NM_009127.3    | stearoyl-Coenzyme A desaturase 1 (Scd1)                                       | 0.57 |
| <i>sci0001118.1_0</i>    | AK002910.1     |                                                                               | 0.58 |
| <i>sci0001849.1_2273</i> | AK031598.1     |                                                                               | 0.30 |
| <i>sci0001978.1_6</i>    | AK050665.1     |                                                                               | 0.53 |
| <i>sci0002315.1_12</i>   | XM_358429.1    |                                                                               | 0.61 |
| <i>sci0002507.1_236</i>  | AK083573.1     |                                                                               | 0.56 |
| <i>sci0002624.1_576</i>  | AK087461.1     |                                                                               | 0.55 |
| <i>sci0002791.1_134</i>  |                |                                                                               | 0.63 |

|                        |                |                                                                                                                                                             |      |
|------------------------|----------------|-------------------------------------------------------------------------------------------------------------------------------------------------------------|------|
| <i>scI0004020.1_31</i> | AK081191.1     |                                                                                                                                                             | 0.66 |
| <i>Scml4</i>           | NM_172938.2    | sex comb on midleg-like 4 ( <i>Drosophila</i> ) ( <i>Scml4</i> )                                                                                            | 0.46 |
| <i>Scoc</i>            | NM_001039137.2 | short coiled-coil protein ( <i>Scoc</i> ), transcript variant 1                                                                                             | 0.55 |
| <i>Scye1</i>           | NM_007926.2    | small inducible cytokine subfamily E, member 1 ( <i>Scye1</i> )                                                                                             | 0.67 |
| <i>Sdc3</i>            | NM_011520.3    | syndecan 3 ( <i>Sdc3</i> )                                                                                                                                  | 0.27 |
| <i>Sdhb</i>            | NM_023374.3    | succinate dehydrogenase complex, subunit B, iron sulfur (Ip) ( <i>Sdhb</i> ), nuclear gene encoding mitochondrial protein                                   | 0.59 |
| <i>Sdhd</i>            | NM_025848.2    | succinate dehydrogenase complex, subunit D, integral membrane protein ( <i>Sdhd</i> ), nuclear gene encoding mitochondrial protein                          | 0.60 |
| <i>Sdpr</i>            | NM_138741.1    | serum deprivation response ( <i>Sdpr</i> )                                                                                                                  | 0.36 |
| <i>Sec11c</i>          | NM_025468.2    | SEC11 homolog C ( <i>S. cerevisiae</i> ) ( <i>Sec11c</i> )                                                                                                  | 0.65 |
| <i>Sec13</i>           | NM_024206.4    | SEC13 homolog ( <i>S. cerevisiae</i> ) ( <i>Sec13</i> )                                                                                                     | 0.56 |
| <i>Sec61g</i>          | NM_011343.2    | SEC61, gamma subunit ( <i>Sec61g</i> )                                                                                                                      | 0.66 |
| <i>Sec63</i>           | NM_153055      |                                                                                                                                                             | 0.64 |
| <i>Seh1l</i>           | NM_001039088.1 | SEH1-like ( <i>S. cerevisiae</i> ) ( <i>Seh1l</i> ), transcript variant 1                                                                                   | 0.66 |
| <i>Sema3a</i>          | NM_009152.2    | sema domain, immunoglobulin domain (Ig), short basic domain, secreted, (semaphorin) 3A ( <i>Sema3a</i> )                                                    | 0.57 |
| <i>Sema4b</i>          | NM_013659.3    | sema domain, immunoglobulin domain (Ig), transmembrane domain (TM) and short cytoplasmic domain, (semaphorin) 4B ( <i>Sema4b</i> )                          | 0.50 |
| <i>Sema5a</i>          | NM_009154.1    |                                                                                                                                                             | 0.48 |
| <i>Septin 11</i>       | NM_001009818.1 | septin 11 ( <i>Sept11</i> )                                                                                                                                 | 0.31 |
| <i>Septin 6</i>        | NM_019942.2    | septin 6 ( <i>Sept6</i> )                                                                                                                                   | 0.53 |
| <i>Septin 9</i>        | NM_017380.1    | septin 9 ( <i>Sept9</i> )                                                                                                                                   | 0.12 |
| <i>Serbp1</i>          | NM_025814.1    | Serpine1 mRNA binding protein 1 ( <i>Serbp1</i> )                                                                                                           | 0.47 |
| <i>Serpine2</i>        | NM_009255.2    | serine (or cysteine) peptidase inhibitor, clade E, member 2 ( <i>Serpine2</i> )                                                                             | 0.40 |
| <i>Set</i>             | AK011630       |                                                                                                                                                             | 0.58 |
| <i>Setd8</i>           | NM_030241.2    | SET domain containing (lysine methyltransferase) 8 ( <i>Setd8</i> )                                                                                         | 0.64 |
| <i>Sf3b3</i>           | NM_133953.2    | splicing factor 3b, subunit 3 ( <i>Sf3b3</i> )                                                                                                              | 0.57 |
| <i>Sf3b4</i>           | NM_153053.3    | splicing factor 3b, subunit 4 ( <i>Sf3b4</i> )                                                                                                              | 0.53 |
| <i>Sfrs1</i>           | NM_173374.3    | splicing factor, arginine/serine-rich 1 (ASF/SF2) ( <i>Sfrs1</i> ), transcript variant 1                                                                    | 0.53 |
| <i>Sfrs10</i>          | NM_009186.4    | splicing factor, arginine/serine-rich 10 (transformer 2 homolog, <i>Drosophila</i> ) ( <i>Sfrs10</i> )                                                      | 0.47 |
| <i>Sfrs11</i>          | NM_001093753.1 | splicing factor, arginine/serine-rich 11 ( <i>Sfrs11</i> ), transcript variant 1                                                                            | 0.50 |
| <i>Sfrs14</i>          | NM_172755.2    | splicing factor, arginine/serine-rich 14 ( <i>Sfrs14</i> )                                                                                                  | 0.66 |
| <i>Sfrs2</i>           | NM_011358.1    | splicing factor, arginine/serine-rich 2 (SC-35) ( <i>Sfrs2</i> )                                                                                            | 0.51 |
| <i>Sfrs2ip</i>         | NM_028148.2    | splicing factor, arginine/serine-rich 2, interacting protein ( <i>Sfrs2ip</i> )                                                                             | 0.67 |
| <i>Sfrs4</i>           | NM_020587.1    | splicing factor, arginine/serine-rich 4 (SRp75) ( <i>Sfrs4</i> )                                                                                            | 0.63 |
| <i>Sfrs9</i>           | NM_025573.3    | splicing factor, arginine/serine rich 9 ( <i>Sfrs9</i> )                                                                                                    | 0.50 |
| <i>Sfxn1</i>           | NM_027324.4    | sideroflexin 1 ( <i>Sfxn1</i> )                                                                                                                             | 0.55 |
| <i>Sgk1</i>            | NM_011361.1    | serum/glucocorticoid regulated kinase 1 ( <i>Sgk1</i> )                                                                                                     | 0.32 |
| <i>Sgol1</i>           | NM_028232.1    | shugoshin-like 1 ( <i>S. pombe</i> ) ( <i>Sgol1</i> )                                                                                                       | 0.49 |
| <i>Sgol2</i>           | NM_199007.1    | shugoshin-like 2 ( <i>S. pombe</i> ) ( <i>Sgol2</i> )                                                                                                       | 0.35 |
| <i>Sgpp1</i>           | NM_030750.2    | sphingosine-1-phosphate phosphatase 1 ( <i>Sgpp1</i> )                                                                                                      | 0.57 |
| <i>Sh3gl2</i>          | NM_019535.2    | SH3-domain GRB2-like 2 ( <i>Sh3gl2</i> )                                                                                                                    | 0.48 |
| <i>Sh3glb2</i>         | NM_139302.1    | SH3-domain GRB2-like endophilin B2 ( <i>Sh3glb2</i> )                                                                                                       | 0.52 |
| <i>Sh3kbp1</i>         | NM_021389.3    | SH3-domain kinase binding protein 1 ( <i>Sh3kbp1</i> )                                                                                                      | 0.63 |
| <i>Sh3pxd2b</i>        | NM_177364.3    | SH3 and PX domains 2B ( <i>Sh3pxd2b</i> )                                                                                                                   | 0.47 |
| <i>Shcbp1</i>          | NM_011369.2    | Shc SH2-domain binding protein 1 ( <i>Shcbp1</i> )                                                                                                          | 0.66 |
| <i>Shmt1</i>           | NM_009171      |                                                                                                                                                             | 0.35 |
| <i>Skil</i>            | NM_001039090.1 | SKI-like ( <i>Skil</i> ), transcript variant 2                                                                                                              | 0.44 |
| <i>Skiv2l2</i>         | NM_028151.2    | superkiller viralicidic activity 2-like 2 ( <i>S. cerevisiae</i> ) ( <i>Skiv2l2</i> )                                                                       | 0.51 |
| <i>Skp2</i>            | NM_145468.1    | S-phase kinase-associated protein 2 (p45) ( <i>Skp2</i> ), transcript variant 2                                                                             | 0.31 |
| <i>Slain2</i>          | NM_153567.1    | SLAIN motif family, member 2 ( <i>Slain2</i> )                                                                                                              | 0.66 |
| <i>Slc12a2</i>         | NM_009194.2    | solute carrier family 12, member 2 ( <i>Slc12a2</i> )                                                                                                       | 0.62 |
| <i>Slc1a4</i>          | NM_018861.2    | solute carrier family 1 (glutamate/neutral amino acid transporter), member 4 ( <i>Slc1a4</i> )                                                              | 0.47 |
| <i>Slc24a3</i>         | NM_053195.2    | solute carrier family 24 (sodium/potassium/calcium exchanger), member 3 ( <i>Slc24a3</i> )                                                                  | 0.44 |
| <i>Slc25a11</i>        | NM_024211.2    | solute carrier family 25 (mitochondrial carrier oxoglutarate carrier), member 11 ( <i>Slc25a11</i> ), nuclear gene encoding mitochondrial protein           | 0.63 |
| <i>Slc25a25</i>        | NM_146118.2    | solute carrier family 25 (mitochondrial carrier, phosphate carrier), member 25 ( <i>Slc25a25</i> ), nuclear gene encoding mitochondrial protein             | 0.30 |
| <i>Slc25a3</i>         | NM_133668.2    | solute carrier family 25 (mitochondrial carrier, phosphate carrier), member 3 ( <i>Slc25a3</i> )                                                            | 0.59 |
| <i>Slc25a39</i>        | NM_026542.1    | solute carrier family 25, member 39 ( <i>Slc25a39</i> )                                                                                                     | 0.58 |
| <i>Slc25a5</i>         | NM_007451.3    | solute carrier family 25 (mitochondrial carrier, adenine nucleotide translocator), member 5 ( <i>Slc25a5</i> ), nuclear gene encoding mitochondrial protein | 0.54 |
| <i>Slc29a1</i>         | NM_022880.1    | solute carrier family 29 (nucleoside transporters), member 1 ( <i>Slc29a1</i> )                                                                             | 0.47 |
| <i>Slc30a5</i>         | NM_022885.2    | solute carrier family 30 (zinc transporter), member 5 ( <i>Slc30a5</i> )                                                                                    | 0.58 |

|                   |                |                                                                                                                             |      |
|-------------------|----------------|-----------------------------------------------------------------------------------------------------------------------------|------|
| <i>Slc31a1</i>    | NM_175090.3    | solute carrier family 31, member 1 (Slc31a1)                                                                                | 0.52 |
| <i>Slc35c2</i>    | NM_144893.1    | solute carrier family 35, member C2 (Slc35c2)                                                                               | 0.61 |
| <i>Slc35e1</i>    | NM_177766.2    | solute carrier family 35, member E1 (Slc35e1)                                                                               | 0.57 |
| <i>Slc35f3</i>    | NM_175434.3    | solute carrier family 35, member F3 (Slc35f3)                                                                               | 0.45 |
| <i>Slc38a10</i>   | NM_024249.4    | solute carrier family 38, member 10 (Slc38a10)                                                                              | 0.61 |
| <i>Slc39a6</i>    | NM_139143.2    | solute carrier family 39 (metal ion transporter), member 6 (Slc39a6)                                                        | 0.55 |
| <i>Slc41a2</i>    | NM_177388.3    | solute carrier family 41, member 2 (Slc41a2)                                                                                | 0.54 |
| <i>Slc4a4</i>     | NM_018760.1    | solute carrier family 4 (anion exchanger), member 4 (Slc4a4)                                                                | 0.50 |
| <i>Slc4a7</i>     | XM_147798.4    |                                                                                                                             | 0.38 |
| <i>Slc6a1</i>     | NM_178703.2    | solute carrier family 6 (neurotransmitter transporter, GABA), member 1 (Slc6a1)                                             | 0.64 |
| <i>Slc6a6</i>     | NM_009320.3    | solute carrier family 6 (neurotransmitter transporter, taurine), member 6 (Slc6a6)                                          | 0.36 |
| <i>Slitrk5</i>    | NM_198865.1    | SLIT and NTRK-like family, member 5 (Slitrk5)                                                                               | 0.64 |
| <i>Slmo2</i>      | NM_025531.2    | slowmo homolog 2 (Drosophila) (Slmo2)                                                                                       | 0.47 |
| <i>Smap2</i>      | NM_133716.2    | stromal membrane-associated GTPase-activating protein 2 (Smap2)                                                             | 0.66 |
| <i>Smc1a</i>      | NM_019710.1    | structural maintenance of chromosomes 1A (Smc1a)                                                                            | 0.56 |
| <i>Smc5l1</i>     | NM_153808      |                                                                                                                             | 0.66 |
| <i>Smn1</i>       | NM_011420.2    | survival motor neuron 1 (Smn1)                                                                                              | 0.55 |
| <i>Smtn</i>       | NM_013870.2    | smoothelin (Smtn)                                                                                                           | 0.29 |
| <i>Smyd2</i>      | NM_026796.1    | SET and MYND domain containing 2 (Smyd2)                                                                                    | 0.67 |
| <i>Snopc4</i>     | NM_172339.2    | small nuclear RNA activating complex, polypeptide 4 (Snopc4)                                                                | 0.45 |
| <i>Snca</i>       | NM_009221.2    | synuclein, alpha (Snca), transcript variant 2                                                                               | 0.49 |
| <i>Snd1</i>       | NM_019776.2    | staphylococcal nuclease and tudor domain containing 1 (Snd1)                                                                | 0.65 |
| <i>Snora65</i>    | NR_002898.1    | small nucleolar RNA, H/ACA box 65 (Snora65) on chromosome 2.                                                                | 0.60 |
| <i>Snrpb</i>      | NM_009225.2    | small nuclear ribonucleoprotein B (Snrpb)                                                                                   | 0.53 |
| <i>Snrpd1</i>     | NM_009226.4    | small nuclear ribonucleoprotein D1 (Snrpd1)                                                                                 | 0.53 |
| <i>Snrpd2</i>     | NM_026943.1    | small nuclear ribonucleoprotein D2 (Snrpd2)                                                                                 | 0.63 |
| <i>Snrpd3</i>     | NM_026095.4    | small nuclear ribonucleoprotein D3 (Snrpd3)                                                                                 | 0.64 |
| <i>Snrpf</i>      | XM_892627.2    | PREDICTED: small nuclear ribonucleoprotein polypeptide F (Snrpf)                                                            | 0.41 |
| <i>Snx9</i>       | NM_025664.5    | sorting nexin 9 (Snx9)                                                                                                      | 0.61 |
| <i>Socs5</i>      | NM_019654.2    | suppressor of cytokine signaling 5 (Socs5)                                                                                  | 0.38 |
| <i>Sorcs1</i>     | NM_021377.1    | VPS10 domain receptor protein SORCS 1 (Sorcs1)                                                                              | 0.36 |
| <i>Sorcs2</i>     | NM_030889.2    | sortilin-related VPS10 domain containing receptor 2 (Sorcs2)                                                                | 0.54 |
| <i>Sox11</i>      | NM_009234.5    | SRY-box containing gene 11 (Sox11)                                                                                          | 0.24 |
| <i>Sox12</i>      | NM_011438.2    | SRY-box containing gene 12 (Sox12)                                                                                          | 0.57 |
| <i>Sox5</i>       | NM_011444.1    | SRY-box containing gene 5 (Sox5)                                                                                            | 0.56 |
| <i>Sox8</i>       | NM_011447.1    | SRY-box containing gene 8 (Sox8)                                                                                            | 0.43 |
| <i>Spag5</i>      | NM_017407.1    | sperm associated antigen 5 (Spag5)                                                                                          | 0.18 |
| <i>Spag7</i>      | NM_172561.1    | sperm associated antigen 7 (Spag7)                                                                                          | 0.63 |
| <i>Spast</i>      | NM_016962.1    | spastin (Spast)                                                                                                             | 0.57 |
| <i>Spata6</i>     | NM_026470.3    | spermatogenesis associated 6 (Spata6)                                                                                       | 0.63 |
| <i>Spc25</i>      | NM_025565.1    | SPC25, NDC80 kinetochore complex component, homolog (S. cerevisiae) (Spc25)                                                 | 0.30 |
| <i>Spcc3</i>      | NM_029701.1    | signal peptidase complex subunit 3 homolog (S. cerevisiae) (Spcc3)                                                          | 0.53 |
| <i>Specc1</i>     | NM_001029936.2 | sperm antigen with calponin homology and coiled-coil domains 1 (Specc1)                                                     | 0.29 |
| <i>Spg7</i>       | NM_153176.4    | spastic paraplegia 7 homolog (human) (Spg7), nuclear gene encoding mitochondrial protein                                    | 0.49 |
| <i>Sphk1</i>      | NM_011451.2    | sphingosine kinase 1 (Sphk1), transcript variant 1                                                                          | 0.46 |
| <i>Spna2</i>      | XM_207079.2    |                                                                                                                             | 0.57 |
| <i>Spp1</i>       | NM_009263.1    | secreted phosphoprotein 1 (Spp1)                                                                                            | 0.26 |
| <i>Spred1</i>     | NM_033524      |                                                                                                                             | 0.45 |
| <i>Spry4</i>      | NM_011898.2    | sprouty homolog 4 (Drosophila) (Spry4)                                                                                      | 0.30 |
| <i>Spsb4</i>      | NM_145134.2    | splA/ryanodine receptor domain and SOCS box containing 4 (Spsb4)                                                            | 0.24 |
| <i>Sqle</i>       | NM_009270.3    | squalene epoxidase (Sqle)                                                                                                   | 0.62 |
| <i>Srm</i>        | NM_009272.2    | spermidine synthase (Srm)                                                                                                   | 0.45 |
| <i>Srpk1</i>      | NM_016795.3    | serine/arginine-rich protein specific kinase 1 (Srpk1)                                                                      | 0.66 |
| <i>Srprb</i>      | NM_009275.4    | signal recognition particle receptor, B subunit (Srprb)                                                                     | 0.65 |
| <i>Srrm2</i>      | NM_175229.3    | serine/arginine repetitive matrix 2 (Srrm2)                                                                                 | 0.42 |
| <i>Ss18</i>       | NM_009280.1    | synovial sarcoma translocation, Chromosome 18 (Ss18)                                                                        | 0.60 |
| <i>Ssbp4</i>      | XM_356132.1    |                                                                                                                             | 0.59 |
| <i>Ssna1</i>      | NM_023464.2    | Sjogren's syndrome nuclear autoantigen 1 (Ssna1)                                                                            | 0.65 |
| <i>Sspn</i>       | NM_010656.2    | sarcospan (Sspn)                                                                                                            | 0.65 |
| <i>Ssr3</i>       | NM_026155.1    | signal sequence receptor, gamma (Ssr3)                                                                                      | 0.43 |
| <i>Sssca1</i>     | NM_020491.4    | Sjogren's syndrome/scleroderma autoantigen 1 homolog (human) (Sssca1)                                                       | 0.62 |
| <i>St13</i>       | NM_133726.2    | suppression of tumorigenicity 13 (St13)                                                                                     | 0.67 |
| <i>St6gal1</i>    | NM_145933.3    | beta galactoside alpha 2,6 sialyltransferase 1 (St6gal1)                                                                    | 0.66 |
| <i>St6galnac5</i> | NM_012028.2    | ST6 (alpha-N-acetyl-neuraminyl-2,3-beta-galactosyl-1, 3)-N-acetylgalactosaminide alpha-2,6-sialyltransferase 5 (St6galnac5) | 0.57 |
| <i>Stab1</i>      | NM_138672.2    | stabilin 1 (Stab1)                                                                                                          | 0.35 |
| <i>Stag2</i>      | NM_001077712.1 | stromal antigen 2 (Stag2), transcript variant 2                                                                             | 0.65 |

|                 |                |                                                                                                                                          |      |
|-----------------|----------------|------------------------------------------------------------------------------------------------------------------------------------------|------|
| <i>Stambpl1</i> | NM_029682.4    | Stam binding protein like 1 (Stambpl1)                                                                                                   | 0.32 |
| <i>Stard4</i>   | NM_133774.4    | StAR-related lipid transfer (START) domain containing 4 (Stard4)                                                                         | 0.39 |
| <i>Stc1</i>     | NM_009285.3    | stanniocalcin 1 (Stc1)                                                                                                                   | 0.32 |
| <i>Stim2</i>    | NM_001081103.1 | stromal interaction molecule 2 (Stim2)                                                                                                   | 0.64 |
| <i>Stip1</i>    | NM_016737.1    | stress-induced phosphoprotein 1 (Stip1)                                                                                                  | 0.45 |
| <i>Stk17b</i>   | NM_133810.2    | serine/threonine kinase 17b (apoptosis-inducing) (Stk17b)                                                                                | 0.40 |
| <i>Stk39</i>    | NM_016866.2    | serine/threonine kinase 39, STE20/SPS1 homolog (yeast) (Stk39)                                                                           | 0.64 |
| <i>Stk4</i>     | NM_021420.2    | serine/threonine kinase 4 (Stk4)                                                                                                         | 0.67 |
| <i>Strap</i>    | NM_011499.2    | serine/threonine kinase receptor associated protein (Strap)                                                                              | 0.56 |
| <i>Stt3b</i>    | NM_024222.2    | STT3, subunit of the oligosaccharyltransferase complex, homolog B (S. cerevisiae) (Stt3b)                                                | 0.59 |
| <i>Stx4a</i>    | NM_009294.3    | syntaxin 4A (placental) (Stx4a)                                                                                                          | 0.60 |
| <i>Stxbp1</i>   | NM_009295.1    | syntaxin binding protein 1 (Stxbp1)                                                                                                      | 0.53 |
| <i>Styx</i>     | NM_019637.3    | serine/threonine/tyrosine interaction protein (Styx)                                                                                     | 0.63 |
| <i>Suclg2</i>   | NM_011507.1    | succinate-Coenzyme A ligase, GDP-forming, beta subunit (Suclg2)                                                                          | 0.65 |
| <i>Sumo2</i>    | NM_133354.1    | SMT3 suppressor of mif two 3 homolog 2 (yeast) (Sumo2)                                                                                   | 0.64 |
| <i>Sumo3</i>    | NM_019929.3    | SMT3 suppressor of mif two 3 homolog 3 (yeast) (Sumo3)                                                                                   | 0.66 |
| <i>Susd4</i>    | NM_144796.4    | sushi domain containing 4 (Susd4)                                                                                                        | 0.64 |
| <i>Suz12</i>    | NM_199196.1    | suppressor of zeste 12 homolog (Drosophila) (Suz12)                                                                                      | 0.51 |
| <i>Sv2a</i>     | NM_022030.3    | synaptic vesicle glycoprotein 2 a (Sv2a)                                                                                                 | 0.37 |
| <i>Swap70</i>   | NM_009302.2    | SWA-70 protein (Swap70)                                                                                                                  | 0.58 |
| <i>Syncrip</i>  | NM_019666.2    | synaptotagmin binding, cytoplasmic RNA interacting protein (Syncrip), transcript variant 1                                               | 0.65 |
| <i>Syt16</i>    | NM_172804.2    | synaptotagmin XVI (Syt16)                                                                                                                | 0.62 |
| <i>Taf10</i>    | NM_020024.3    | TAF10 RNA polymerase II, TATA box binding protein (TBP)-associated factor (Taf10)                                                        | 0.57 |
| <i>Taf12</i>    | BC019668       |                                                                                                                                          | 0.63 |
| <i>Taf9</i>     | NM_027139.3    | TAF9 RNA polymerase II, TATA box binding protein (TBP)-associated factor (Taf9), transcript variant 1                                    | 0.56 |
| <i>Tagap</i>    | NM_145968.1    | T-cell activation Rho GTPase-activating protein (Tagap)                                                                                  | 0.65 |
| <i>Tanc1</i>    | NM_198294.2    | tetratricopeptide repeat, ankyrin repeat and coiled-coil containing 1 (Tanc1)                                                            | 0.50 |
| <i>Tbc1d1</i>   | NM_019636.2    | TBC1 domain family, member 1 (Tbc1d1)                                                                                                    | 0.40 |
| <i>Tbc1d20</i>  | NM_024196.3    | TBC1 domain family, member 20 (Tbc1d20)                                                                                                  | 0.65 |
| <i>Tbca</i>     | NM_009321.2    | tubulin cofactor a (Tbca)                                                                                                                | 0.59 |
| <i>Tbrg4</i>    | NM_134011.1    | transforming growth factor beta regulated gene 4 (Tbrg4)                                                                                 | 0.38 |
| <i>Tcerg1</i>   | NM_001039474.1 | transcription elongation regulator 1 (CA150) (Tcerg1)                                                                                    | 0.51 |
| <i>Tcf12</i>    | NM_011544.2    | transcription factor 12 (Tcf12)                                                                                                          | 0.47 |
| <i>Tcf19</i>    | NM_025674.1    | transcription factor 19 (Tcf19)                                                                                                          | 0.61 |
| <i>Tcf4</i>     | NM_013685.2    | transcription factor 4 (Tcf4), transcript variant 1                                                                                      | 0.53 |
| <i>Tcof1</i>    | NM_011552.2    | Treacher Collins Franceschetti syndrome 1, homolog (Tcof1)                                                                               | 0.67 |
| <i>Tcp1</i>     | NM_013686.3    | t-complex protein 1 (Tcp1)                                                                                                               | 0.59 |
| <i>Tdg</i>      | NM_011561.1    | thymine DNA glycosylase (Tdg), transcript variant 1                                                                                      | 0.63 |
| <i>Tdrkh</i>    | NM_028307.1    | tudor and KH domain containing protein (Tdrkh)                                                                                           | 0.66 |
| <i>Tead2</i>    | NM_011565.2    | TEA domain family member 2 (Tead2)                                                                                                       | 0.32 |
| <i>Tfdp1</i>    | NM_009361.1    |                                                                                                                                          | 0.44 |
| <i>Tfg</i>      | NM_019678.2    | Trk-fused gene (Tfg)                                                                                                                     | 0.63 |
| <i>Tfrc</i>     | NM_011638.3    | transferrin receptor (Tfrc)                                                                                                              | 0.34 |
| <i>Tgfb1</i>    | NM_009370.2    | transforming growth factor, beta receptor I (Tgfb1)                                                                                      | 0.59 |
| <i>Thoc4</i>    | NM_011568.1    | THO complex 4 (Thoc4)                                                                                                                    | 0.38 |
| <i>Thoc7</i>    | NM_025435.2    | THO complex 7 homolog (Drosophila) (Thoc7), transcript variant 1                                                                         | 0.53 |
| <i>Thumpd1</i>  | NM_145585.1    | THUMP domain containing 1 (Thumpd1)                                                                                                      | 0.58 |
| <i>Thy1</i>     | NM_009382.3    | thymus cell antigen 1, theta (Thy1)                                                                                                      | 0.36 |
| <i>Thyn1</i>    | NM_144543.1    | thymocyte nuclear protein 1 (Thyn1)                                                                                                      | 0.65 |
| <i>Timeless</i> | NM_011589.1    | timeless homolog (Drosophila) (Timeless), transcript variant 2                                                                           | 0.39 |
| <i>Timm10</i>   | NM_013899.1    | translocase of inner mitochondrial membrane 10 homolog (yeast) (Timm10)                                                                  | 0.60 |
| <i>Timm17a</i>  | NM_011590.2    | translocase of inner mitochondrial membrane 17a (Timm17a), nuclear gene encoding mitochondrial protein                                   | 0.47 |
| <i>Timm8a1</i>  | NM_013898.1    | translocase of inner mitochondrial membrane 8 homolog a1 (yeast) (Timm8a1)                                                               | 0.60 |
| <i>Timm8b</i>   | NM_013897.1    | translocase of inner mitochondrial membrane 8 homolog b (yeast) (Timm8b)                                                                 | 0.50 |
| <i>Timm9</i>    | NM_013896.3    | translocase of inner mitochondrial membrane 9 homolog (yeast) (Timm9), nuclear gene encoding mitochondrial protein, transcript variant 1 | 0.56 |
| <i>Timp1</i>    | NM_011593.2    | tissue inhibitor of metalloproteinase 1 (Timp1), transcript variant 2                                                                    | 0.35 |
| <i>Timp4</i>    | NM_080639.3    | tissue inhibitor of metalloproteinase 4 (Timp4)                                                                                          | 0.17 |
| <i>Tipin</i>    | NM_025372.1    | timeless interacting protein (Tipin)                                                                                                     | 0.42 |
| <i>Tk1</i>      | NM_009387.1    | thymidine kinase 1 (Tk1)                                                                                                                 | 0.18 |
| <i>Tlcd1</i>    | NM_026708.1    | TLC domain containing 1 (Tlcd1)                                                                                                          | 0.59 |
| <i>Tle1</i>     | NM_011599.3    | transducin-like enhancer of split 1, homolog of Drosophila E(spl) (Tle1)                                                                 | 0.57 |
| <i>Tle2</i>     | NM_019725.1    | transducin-like enhancer of split 2, homolog of Drosophila E(spl) (Tle2)                                                                 | 0.53 |

|                  |                |                                                                                                                            |      |
|------------------|----------------|----------------------------------------------------------------------------------------------------------------------------|------|
| <i>Tle6</i>      | NM_053254.2    | transducin-like enhancer of split 6, homolog of Drosophila E(spl) (Tle6)                                                   | 0.18 |
| <i>Tmed3</i>     | NM_025360.1    | transmembrane emp24 domain containing 3 (Tmed3)                                                                            | 0.55 |
| <i>Tmed7</i>     | XM_990639.1    | PREDICTED: transmembrane emp24 protein transport domain containing 7 (Tmed7)                                               | 0.59 |
| <i>Tmed9</i>     | NM_026211.1    | transmembrane emp24 protein transport domain containing 9 (Tmed9)                                                          | 0.55 |
| <i>Tmem109</i>   | NM_134142.1    | transmembrane protein 109 (Tmem109)                                                                                        | 0.60 |
| <i>Tmem11</i>    | NM_173453.2    | transmembrane protein 11 (Tmem11)                                                                                          | 0.55 |
| <i>Tmem126a</i>  | NM_025460.1    | transmembrane protein 126A (Tmem126a)                                                                                      | 0.61 |
| <i>Tmem132a</i>  | NM_133804.2    | transmembrane protein 132A (Tmem132a)                                                                                      | 0.46 |
| <i>Tmem14c</i>   | NM_025387.1    | transmembrane protein 14C (Tmem14c)                                                                                        | 0.54 |
| <i>Tmem167</i>   | NM_025335.2    | transmembrane protein 167 (Tmem167)                                                                                        | 0.58 |
| <i>Tmem176a</i>  | NM_025326.2    | transmembrane protein 176A (Tmem176a)                                                                                      | 0.29 |
| <i>Tmem176b</i>  | NM_023056.3    | transmembrane protein 176B (Tmem176b)                                                                                      | 0.43 |
| <i>Tmem184b</i>  | NM_172608.1    | transmembrane protein 184b (Tmem184b)                                                                                      | 0.52 |
| <i>Tmem199</i>   | NM_199199.2    | transmembrane protein 199 (Tmem199)                                                                                        | 0.58 |
| <i>Tmem2</i>     | NM_001033759.1 | transmembrane protein 2 (Tmem2), transcript variant 2                                                                      | 0.61 |
| <i>Tmem41a</i>   | NM_025693.3    | transmembrane protein 41a (Tmem41a)                                                                                        | 0.60 |
| <i>Tmem44</i>    | NM_172614.3    | transmembrane protein 44 (Tmem44)                                                                                          | 0.36 |
| <i>Tmem48</i>    | NM_028355.3    | transmembrane protein 48 (Tmem48)                                                                                          | 0.47 |
| <i>Tmem49</i>    | NM_029478.3    | transmembrane protein 49 (Tmem49)                                                                                          | 0.48 |
| <i>Tmem55b</i>   | NM_001033271.3 | transmembrane protein 55b (Tmem55b)                                                                                        | 0.46 |
| <i>Tmem56</i>    | NM_178936.3    | transmembrane protein 56 (Tmem56)                                                                                          | 0.61 |
| <i>Tmem63b</i>   | NM_198167.2    | transmembrane protein 63b (Tmem63b)                                                                                        | 0.51 |
| <i>Tmem68</i>    | NM_028097.3    | transmembrane protein 68 (Tmem68)                                                                                          | 0.46 |
| <i>Tmem70</i>    | NM_027415.2    | transmembrane protein 70 (Tmem70), transcript variant 1                                                                    | 0.62 |
| <i>Tmem88</i>    | NM_025915.3    | transmembrane protein 88 (Tmem88)                                                                                          | 0.64 |
| <i>Tmem97</i>    | NM_133706.2    | transmembrane protein 97 (Tmem97)                                                                                          | 0.33 |
| <i>Tmpo</i>      | NM_001080129.1 | thymopoietin (Tmpo), transcript variant 3                                                                                  | 0.61 |
| <i>Tmsb10</i>    | NM_025284.3    | thymosin, beta 10 (Tmsb10)                                                                                                 | 0.53 |
| <i>Tmsb4x</i>    | NM_021278.2    | thymosin, beta 4, X chromosome (Tmsb4x)                                                                                    | 0.61 |
| <i>Tnc</i>       | NM_011607.2    | tenascin C (Tnc)                                                                                                           | 0.03 |
| <i>Tnfrsf10b</i> | NM_020275.3    | tumor necrosis factor receptor superfamily, member 10b (Tnfrsf10b)                                                         | 0.52 |
| <i>Tnfrsf12a</i> | NM_013749.1    | tumor necrosis factor receptor superfamily, member 12a (Tnfrsf12a)                                                         | 0.38 |
| <i>Tnfrsf21</i>  | NM_178589.2    | tumor necrosis factor receptor superfamily, member 21 (Tnfrsf21)                                                           | 0.16 |
| <i>Tnik</i>      | XM_130797      |                                                                                                                            | 0.61 |
| <i>Tnpo3</i>     | NM_177296.4    | transportin 3 (Tnpo3)                                                                                                      | 0.62 |
| <i>Tnrc6a</i>    | NM_144925.3    | trinucleotide repeat containing 6a (Tnrc6a)                                                                                | 0.62 |
| <i>Tomm22</i>    | NM_172609.3    | translocase of outer mitochondrial membrane 22 homolog (yeast) (Tomm22), nuclear gene encoding mitochondrial protein       | 0.55 |
| <i>Tomm40l</i>   | NM_001037170.2 | translocase of outer mitochondrial membrane 40 homolog-like (yeast) (Tomm40l), nuclear gene encoding mitochondrial protein | 0.61 |
| <i>Top1</i>      | NM_009408.2    | topoisomerase (DNA) I (Top1)                                                                                               | 0.66 |
| <i>Top2a</i>     | NM_011623.1    | topoisomerase (DNA) II alpha (Top2a)                                                                                       | 0.15 |
| <i>Tpi1</i>      | NM_009415.1    | triosephosphate isomerase 1 (Tpi1)                                                                                         | 0.63 |
| <i>Tpm3</i>      | NM_022314.2    | tropomyosin 3, gamma (Tpm3)                                                                                                | 0.50 |
| <i>Tpm4</i>      | NM_001001491.1 | tropomyosin 4 (Tpm4)                                                                                                       | 0.46 |
| <i>Tpp2</i>      | NM_009418.2    | tripeptidyl peptidase II (Tpp2)                                                                                            | 0.59 |
| <i>Tpst1</i>     | NM_013837.1    | protein-tyrosine sulfotransferase 1 (Tpst1), transcript variant 2                                                          | 0.63 |
| <i>Tpx2</i>      | NM_028109.3    | TPX2, microtubule-associated protein homolog (Xenopus laevis) (Tpx2)                                                       | 0.31 |
| <i>Traf3</i>     | NM_011632.2    | Tnf receptor-associated factor 3 (Traf3), transcript variant 1                                                             | 0.65 |
| <i>Traf4</i>     | NM_009423.3    | Tnf receptor associated factor 4 (Traf4)                                                                                   | 0.43 |
| <i>Trak2</i>     | NM_172406.2    | trafficking protein, kinesin binding 2 (Trak2)                                                                             | 0.48 |
| <i>Tram1</i>     | NM_028173.1    | translocating chain-associating membrane protein 1 (Tram1)                                                                 | 0.57 |
| <i>Trappc1</i>   | NM_001024206.1 | trafficking protein particle complex 1 (Trappc1)                                                                           | 0.49 |
| <i>Trf</i>       | NM_133977.2    | transferrin (Trf)                                                                                                          | 0.10 |
| <i>Trib2</i>     | NM_144551.3    |                                                                                                                            | 0.20 |
| <i>Trim27</i>    | NM_009054.2    | tripartite motif-containing 27 (Trim27)                                                                                    | 0.64 |
| <i>Trim28</i>    | NM_011588.2    | tripartite motif protein 28 (Trim28)                                                                                       | 0.44 |
| <i>Trim59</i>    | NM_025863.2    | tripartite motif-containing 59 (Trim59)                                                                                    | 0.54 |
| <i>Trim62</i>    | NM_178110.2    | tripartite motif-containing 62 (Trim62)                                                                                    | 0.44 |
| <i>Trim8</i>     | NM_053100.1    | tripartite motif protein 8 (Trim8)                                                                                         | 0.57 |
| <i>Trim9</i>     | NM_053167.1    | tripartite motif protein 9 (Trim9)                                                                                         | 0.67 |
| <i>Trio</i>      |                |                                                                                                                            | 0.56 |
| <i>Trip12</i>    | NM_133975.4    | thyroid hormone receptor interactor 12 (Trip12)                                                                            | 0.62 |
| <i>Trmt1</i>     | NM_027296.2    | tRNA nucleotidyl transferase, CCA-adding, 1 (Trmt1)                                                                        | 0.65 |
| <i>Troap</i>     | XM_912265.2    | PREDICTED: trophinin associated protein (Troap)                                                                            | 0.31 |
| <i>Trp53</i>     | NM_011640.2    | transformation related protein 53 (Trp53)                                                                                  | 0.62 |
| <i>Trp53i11</i>  | NM_001025246.1 | transformation related protein 53 inducible protein 11 (Trp53i11)                                                          | 0.30 |
| <i>Trp53inp2</i> | NM_178111.3    | transformation related protein 53 inducible nuclear protein 2 (Trp53inp2)                                                  | 0.49 |
| <i>Tsen15</i>    | NM_025677.2    | tRNA splicing endonuclease 15 homolog (S. cerevisiae) (Tsen15)                                                             | 0.67 |



|                 |                |                                                                                                     |      |
|-----------------|----------------|-----------------------------------------------------------------------------------------------------|------|
| <i>Tsfm</i>     | NM_025537.3    | Ts translation elongation factor, mitochondrial (Tsfm), nuclear gene encoding mitochondrial protein | 0.62 |
| <i>Tspan12</i>  | NM_173007.3    | tetraspanin 12 (Tspan12)                                                                            | 0.45 |
| <i>Tspan7</i>   | NM_019634.2    | tetraspanin 7 (Tspan7)                                                                              | 0.66 |
| <i>Tssc4</i>    | NM_138631.1    | tumor-suppressing subchromosomal transferable fragment 4 (Tssc4), transcript variant 2              | 0.52 |
| <i>Ttc13</i>    | XM_358379.1    |                                                                                                     | 0.55 |
| <i>Ttc3</i>     | NM_009441.1    | tetratricopeptide repeat domain 3 (Ttc3)                                                            | 0.53 |
| <i>Ttc7b</i>    | XM_127105.8    | PREDICTED: tetratricopeptide repeat domain 7B, transcript variant 1 (Ttc7b)                         | 0.51 |
| <i>Ttyh3</i>    | NM_175274.3    | tweety homolog 3 (Drosophila) (Ttyh3)                                                               | 0.21 |
| <i>Tuba6</i>    | XM_147357.1    |                                                                                                     | 0.33 |
| <i>Tubb5</i>    | NM_011655.4    | tubulin, beta 5 (Tubb5)                                                                             | 0.39 |
| <i>Tubb6</i>    | NM_026473.2    | tubulin, beta 6 (Tubb6)                                                                             | 0.19 |
| <i>Tubg1</i>    | NM_134024.2    | tubulin, gamma 1 (Tubg1)                                                                            | 0.45 |
| <i>Tufm</i>     | NM_172745.2    | Tu translation elongation factor, mitochondrial (Tufm), nuclear gene encoding mitochondrial protein | 0.62 |
| <i>Txn1</i>     | NM_011660.3    | thioredoxin 1 (Txn1)                                                                                | 0.28 |
| <i>Txndc12</i>  | NM_025334.3    | thioredoxin domain containing 12 (endoplasmic reticulum) (Txndc12)                                  | 0.61 |
| <i>Txnl4a</i>   | NM_025299.3    | thioredoxin-like 4A (Txnl4a), transcript variant 1                                                  | 0.65 |
| <i>Tyms</i>     | NM_021288.3    | thymidylate synthase (Tyms)                                                                         | 0.36 |
| <i>Tyms-ps</i>  | NR_000040.1    | thymidylate synthase, pseudogene (Tyms-ps), non-coding RNA.                                         | 0.39 |
| <i>U2af1</i>    | NM_024187      |                                                                                                     | 0.64 |
| <i>U2af2</i>    | NM_133671.1    | U2 small nuclear ribonucleoprotein auxiliary factor (U2AF) 2 (U2af2)                                | 0.64 |
| <i>Uba1</i>     | NM_009457.3    | ubiquitin-like modifier activating enzyme 1 (Uba1)                                                  | 0.56 |
| <i>Uba2</i>     | NM_016682.2    | ubiquitin-like modifier activating enzyme 2 (Uba2)                                                  | 0.49 |
| <i>Ubap2</i>    | NM_026872.1    | ubiquitin-associated protein 2 (Ubap2)                                                              | 0.62 |
| <i>Ube2a</i>    | NM_019668.3    | ubiquitin-conjugating enzyme E2A, RAD6 homolog (S. cerevisiae) (Ube2a)                              | 0.54 |
| <i>Ube2f</i>    | NM_026454.2    | ubiquitin-conjugating enzyme E2F (putative) (Ube2f)                                                 | 0.51 |
| <i>Ube2g1</i>   | NM_025985.4    | ubiquitin-conjugating enzyme E2G 1 (UBC7 homolog, C. elegans) (Ube2g1)                              | 0.54 |
| <i>Ube2k</i>    | NM_016786.3    | ubiquitin-conjugating enzyme E2K (UBC1 homolog, yeast) (Ube2k)                                      | 0.58 |
| <i>Ube2m</i>    | NM_145578.1    | ubiquitin-conjugating enzyme E2M (UBC12 homolog, yeast) (Ube2m)                                     | 0.64 |
| <i>Ube2q1</i>   | NM_027315.3    | ubiquitin-conjugating enzyme E2Q (putative) 1 (Ube2q1)                                              | 0.65 |
| <i>Ube2t</i>    | NM_026024.2    | ubiquitin-conjugating enzyme E2T (putative) (Ube2t)                                                 | 0.58 |
| <i>Ube3c</i>    | NM_133907.3    | ubiquitin protein ligase E3C (Ube3c)                                                                | 0.58 |
| <i>Ubr7</i>     | NM_025666.2    | ubiquitin protein ligase E3 component n-recogin 7 (putative) (Ubr7)                                 | 0.54 |
| <i>Uchl3</i>    | NM_016723.1    | ubiquitin carboxyl-terminal esterase L3 (ubiquitin thiolesterase) (Uchl3)                           | 0.56 |
| <i>Uchl5</i>    | NM_019562.1    | ubiquitin carboxyl-terminal esterase L5 (Uchl5)                                                     | 0.58 |
| <i>Uck2</i>     | NM_030724.3    | uridine-cytidine kinase 2 (Uck2)                                                                    | 0.48 |
| <i>Ugcg</i>     | NM_011673      |                                                                                                     | 0.54 |
| <i>Uhrf1</i>    | NM_010931.2    | ubiquitin-like, containing PHD and RING finger domains, 1 (Uhrf1)                                   | 0.11 |
| <i>Uhrf2</i>    | NM_144873.2    | ubiquitin-like, containing PHD and RING finger domains 2 (Uhrf2)                                    | 0.59 |
| <i>Ung</i>      | NM_011677.2    | uracil DNA glycosylase (Ung), transcript variant 2                                                  | 0.36 |
| <i>Upf3a</i>    | NM_025924.2    | UPF3 regulator of nonsense transcripts homolog A (yeast) (Upf3a)                                    | 0.59 |
| <i>Upp1</i>     | NM_009477.1    | uridine phosphorylase 1 (Upp1)                                                                      | 0.22 |
| <i>Uqcrc1</i>   | NM_025407.2    | ubiquinol-cytochrome c reductase core protein 1 (Uqcrc1)                                            | 0.57 |
| <i>Uqcrc2</i>   | NM_025899.2    | ubiquinol cytochrome c reductase core protein 2 (Uqcrc2)                                            | 0.62 |
| <i>Uqcrh</i>    | NM_025641.3    | ubiquinol-cytochrome c reductase hinge protein (Uqcrh)                                              | 0.54 |
| <i>Usp1</i>     | NM_146144.2    | ubiquitin specific peptidase 1 (Usp1)                                                               | 0.45 |
| <i>Usp39</i>    | NM_138592.3    | ubiquitin specific peptidase 39 (Usp39)                                                             | 0.62 |
| <i>Usp11</i>    | NM_001013378.1 | ubiquitin specific peptidase like 1 (Usp11)                                                         | 0.67 |
| <i>Utp111</i>   | NM_026031.3    | UTP11-like, U3 small nucleolar ribonucleoprotein, (yeast) (Utp111)                                  | 0.55 |
| <i>Uxt</i>      | NM_013840.2    | ubiquitously expressed transcript (Uxt)                                                             | 0.64 |
| <i>Vamp3</i>    | NM_009498.3    | vesicle-associated membrane protein 3 (Vamp3)                                                       | 0.61 |
| <i>Vapa</i>     | NM_013933.2    | vesicle-associated membrane protein, associated protein A (Vapa)                                    | 0.66 |
| <i>Vapb</i>     | NM_019806.5    | vesicle-associated membrane protein, associated protein B and C (Vapb)                              | 0.63 |
| <i>Vars</i>     | NM_011690.2    | valyl-tRNA synthetase (Vars), nuclear gene encoding mitochondrial protein                           | 0.53 |
| <i>Vav3</i>     | NM_020505.2    | vav 3 oncogene (Vav3), transcript variant 1                                                         | 0.21 |
| <i>Vbp1</i>     | NM_011692.2    | von Hippel-Lindau binding protein 1 (Vbp1)                                                          | 0.54 |
| <i>Vcp</i>      | NM_009503.3    | valosin containing protein (Vcp)                                                                    | 0.67 |
| <i>Vdac1</i>    | NM_011694.3    | voltage-dependent anion channel 1 (Vdac1)                                                           | 0.55 |
| <i>Vdac2</i>    | NM_011695.2    | voltage-dependent anion channel 2 (Vdac2)                                                           | 0.32 |
| <i>Vdac3</i>    | NM_011696.1    | voltage-dependent anion channel 3 (Vdac3)                                                           | 0.62 |
| <i>Vegfa</i>    | NM_009505.3    | vascular endothelial growth factor A (Vegfa), transcript variant 2                                  | 0.41 |
| <i>Vegfc</i>    | NM_009506.2    | vascular endothelial growth factor C (Vegfc)                                                        | 0.52 |
| <i>Vkorc111</i> | NM_027121.3    | vitamin K epoxide reductase complex, subunit 1-like 1 (Vkorc111), transcript variant 1              | 0.49 |
| <i>Vldlr</i>    | NM_013703.1    | very low density lipoprotein receptor (Vldlr)                                                       | 0.47 |
| <i>Vps29</i>    | NM_019780.1    | vacuolar protein sorting 29 (S. pombe) (Vps29)                                                      | 0.53 |
| <i>Vps36</i>    | NM_027338.1    | vacuolar protein sorting 36 (yeast) (Vps36)                                                         | 0.43 |
| <i>Vps54</i>    | NM_139061.3    | vacuolar protein sorting 54 (yeast) (Vps54)                                                         | 0.55 |

|                |                |                                                                                                   |      |
|----------------|----------------|---------------------------------------------------------------------------------------------------|------|
| <i>Vrk1</i>    | NM_001029843.1 | vaccinia related kinase 1 (Vrk1), transcript variant 2                                            | 0.53 |
| <i>Wasf1</i>   | NM_031877.2    | WASP family 1 (Wasf1)                                                                             | 0.62 |
| <i>Wasf2</i>   | NM_153423      |                                                                                                   | 0.66 |
| <i>Wbp11</i>   | NM_021714.3    | WW domain binding protein 11 (Wbp11)                                                              | 0.58 |
| <i>Wbscr17</i> | NM_145218.3    | Williams-Beuren syndrome chromosome 17 homolog (human) (Wbscr17)                                  | 0.52 |
| <i>Wdr43</i>   | XM_917905.3    | PREDICTED: WD repeat domain 43, transcript variant 9 (Wdr43)                                      | 0.66 |
| <i>Wdr51b</i>  | NM_027740.3    | WD repeat domain 51B (Wdr51b)                                                                     | 0.65 |
| <i>Wdr74</i>   | NM_134139.1    | WD repeat domain 74 (Wdr74)                                                                       | 0.65 |
| <i>Wdr75</i>   | NM_028599.1    | WD repeat domain 75 (Wdr75)                                                                       | 0.52 |
| <i>Wdr76</i>   | NM_030234.2    | WD repeat domain 76 (Wdr76)                                                                       | 0.56 |
| <i>Wdr82</i>   | NM_029896.1    | WD repeat domain containing 82 (Wdr82)                                                            | 0.64 |
| <i>Wdr89</i>   | XM_001479426.1 | PREDICTED: WD repeat domain 89, transcript variant 2 (Wdr89)                                      | 0.65 |
| <i>Whsc1</i>   | XM_132006      |                                                                                                   | 0.43 |
| <i>Wipf1</i>   | NM_153138.3    | WAS/WASL interacting protein family, member 1 (Wipf1)                                             | 0.64 |
| <i>Wsb2</i>    | NM_021539.4    | WD repeat and SOCS box-containing 2 (Wsb2)                                                        | 0.31 |
| <i>Wscd1</i>   | NM_177618.4    | WSC domain containing 1 (Wscd1)                                                                   | 0.35 |
| <i>Wwp1</i>    | NM_177327.3    | WW domain containing E3 ubiquitin protein ligase 1 (Wwp1)                                         | 0.62 |
| <i>Xpnpep1</i> | NM_133216.2    | X-prolyl aminopeptidase (aminopeptidase P) 1, soluble (Xpnpep1)                                   | 0.59 |
| <i>Xrcc6</i>   | NM_010247.1    | X-ray repair complementing defective repair in Chinese hamster cells 6 (Xrcc6)                    | 0.50 |
| <i>Yeats4</i>  | NM_026570.1    | YEATS domain containing 4 (Yeats4)                                                                | 0.52 |
| <i>Yrdc</i>    | NM_153566.1    | yrdC domain containing (E.coli) (Yrdc)                                                            | 0.66 |
| <i>Ythdf1</i>  | NM_173761.3    | YTH domain family 1 (Ythdf1)                                                                      | 0.66 |
| <i>Ythdf2</i>  | NM_145393.3    | YTH domain family 2 (Ythdf2)                                                                      | 0.66 |
| <i>Ywhag</i>   | NM_018871.2    | tyrosine 3-monooxygenase/tryptophan 5-monooxygenase activation protein, gamma polypeptide (Ywhag) | 0.62 |
| <i>Ywhah</i>   | NM_011738.1    | tyrosine 3-monooxygenase/tryptophan 5-monooxygenase activation protein, eta polypeptide (Ywhah)   | 0.31 |
| <i>Zbed4</i>   | NM_181412.3    | zinc finger, BED domain containing 4 (Zbed4)                                                      | 0.64 |
| <i>Zbtb7c</i>  | NM_145356.3    | zinc finger and BTB domain containing 7C (Zbtb7c)                                                 | 0.53 |
| <i>Zc3h13</i>  | NM_026083.2    | zinc finger CCCH type containing 13 (Zc3h13)                                                      | 0.61 |
| <i>Zc3h18</i>  | NM_001029993.1 | zinc finger CCCH-type containing 18 (Zc3h18), transcript variant 1                                | 0.65 |
| <i>Zc3hc1</i>  | NM_172735.1    | zinc finger, C3HC type 1 (Zc3hc1)                                                                 | 0.66 |
| <i>Zcchc8</i>  | NM_027494.1    | zinc finger, CCHC domain containing 8 (Zcchc8)                                                    | 0.61 |
| <i>Zdhhc21</i> | NM_026647.2    | zinc finger, DHHC domain containing 21 (Zdhhc21)                                                  | 0.49 |
| <i>Zdhhc6</i>  | NM_025883.3    | zinc finger, DHHC domain containing 6 (Zdhhc6), transcript variant 2                              | 0.59 |
| <i>Zeb1</i>    | NM_011546.2    | zinc finger E-box binding homeobox 1 (Zeb1)                                                       | 0.25 |
| <i>Zfp106</i>  | NM_011743.2    | zinc finger protein 106 (Zfp106)                                                                  | 0.62 |
| <i>Zfp131</i>  | NM_028245.1    | zinc finger protein 131 (Zfp131)                                                                  | 0.53 |
| <i>Zfp148</i>  | NM_011749.4    | zinc finger protein 148 (Zfp148)                                                                  | 0.51 |
| <i>Zfp207</i>  | NM_011751.2    | zinc finger protein 207 (Zfp207)                                                                  | 0.65 |
| <i>Zfp276</i>  | NM_020497      |                                                                                                   | 0.66 |
| <i>Zfp326</i>  | NM_018759.1    | zinc finger protein 326 (Zfp326)                                                                  | 0.66 |
| <i>Zfp330</i>  | NM_145600.1    | zinc finger protein 330 (Zfp330)                                                                  | 0.49 |
| <i>Zfp365</i>  | NM_178679.2    | zinc finger protein 365 (Zfp365)                                                                  | 0.38 |
| <i>Zfp518b</i> | NM_001081144.1 | zinc finger protein 518B (Zfp518b)                                                                | 0.59 |
| <i>Zfp710</i>  | NM_175433.4    | zinc finger protein 710 (Zfp710)                                                                  | 0.53 |
| <i>Zfp770</i>  | NM_175466.2    | zinc finger protein 770 (Zfp770)                                                                  | 0.49 |
| <i>Zfpm2</i>   | NM_011766.2    | zinc finger protein, multitype 2 (Zfpm2)                                                          | 0.66 |
| <i>Zmiz1</i>   | NM_183208.2    | zinc finger, MIZ-type containing 1 (Zmiz1)                                                        | 0.56 |
| <i>Znrd1</i>   | NM_023162.4    | zinc ribbon domain containing, 1 (Znrd1)                                                          | 0.67 |
| <i>Znrf2</i>   | NM_199143.1    | zinc and ring finger 2 (Znrf2)                                                                    | 0.27 |
| <i>Zswim6</i>  | XM_358311      |                                                                                                   | 0.56 |
| <i>Zwint</i>   | NM_025635.1    |                                                                                                   | 0.59 |
| <i>Zyx</i>     | NM_011777.2    | zyxin (Zyx)                                                                                       | 0.49 |
