# Supplementary material for: miR-30 Family miRNAs Mediate the Effect of Chronic Social Defeat Stress on Hippocampal Neurogenesis in Mouse Depression Model
Source: PubMed Central journal article supplement (PMC6694739; doi:10.3389/fnmol.2019.00188), 2019-08-08
Supplement: Table_11.pdf [file Table_11.pdf]

**Table S11. List of genes, which demonstrated increased expression (fold change  $\geq 1.5$  and  $p \leq 0.05$ ) in the differentiated cells from the late phase (day 7) when compared with the differentiated cells from an early phase (day 2)**

| <u>Gene Symbol</u>   | <u>Accession No.</u> | <u>Gene Definition</u>                                                                                      | <u>Fold Change</u> |
|----------------------|----------------------|-------------------------------------------------------------------------------------------------------------|--------------------|
| <i>1700007K13Rik</i> | NM_027040.1          | RIKEN cDNA 1700007K13 gene (1700007K13Rik)                                                                  | 1.80               |
| <i>1700027N10Rik</i> | NM_029338.3          | RIKEN cDNA 1700027N10 gene (1700027N10Rik)                                                                  | 1.58               |
| <i>2010004M13Rik</i> |                      |                                                                                                             | 1.63               |
| <i>4932425I24Rik</i> | NM_001081025.1       | RIKEN cDNA 4932425I24 gene (4932425I24Rik)                                                                  | 1.58               |
| <i>4933426M11Rik</i> | NM_178682.3          | RIKEN cDNA 4933426M11 gene (4933426M11Rik)                                                                  | 1.53               |
| <i>5031428M13Rik</i> | AK030317             |                                                                                                             | 1.57               |
| <i>9330185J12Rik</i> |                      |                                                                                                             | 1.54               |
| <i>Abhd7</i>         | NM_001001804.1       | abhydrolase domain containing 7 (Abhd7)                                                                     | 2.13               |
| <i>Acsl6</i>         | NM_001033597.1       | acyl-CoA synthetase long-chain family member 6 (Acsl6), transcript variant 2                                | 1.62               |
| <i>Adamtsl4</i>      | NM_144899.2          | ADAMTS-like 4 (Adamtsl4)                                                                                    | 1.56               |
| <i>Ankrd50</i>       | NM_001033198.2       | ankrin repeat domain 50 (Ankrd50)                                                                           | 1.53               |
| <i>Arhgap12</i>      | NM_029277.2          | Rho GTPase activating protein 12 (Arhgap12), transcript variant 2                                           | 1.71               |
| <i>Arsb</i>          | NM_009712.3          | arylsulfatase B (Arsb)                                                                                      | 2.30               |
| <i>AW555464</i>      | XM_127132.3          |                                                                                                             | 1.61               |
| <i>B230326M20Rik</i> | AK045953             |                                                                                                             | 1.67               |
| <i>BC099439</i>      | NM_001025564.1       | cDNA sequence BC099439 (BC099439)                                                                           | 2.74               |
| <i>Bdh2</i>          | NM_027208.1          | 3-hydroxybutyrate dehydrogenase, type 2 (Bdh2)                                                              | 1.79               |
| <i>Bicc1</i>         | NM_031397.2          | bicaudal C homolog 1 (Drosophila) (Bicc1)                                                                   | 1.53               |
| <i>C3</i>            | NM_009778.1          |                                                                                                             | 12.22              |
| <i>C530044C16Rik</i> |                      |                                                                                                             | 1.93               |
| <i>Ccng1</i>         | NM_009831.2          | cyclin G1 (Ccng1)                                                                                           | 1.56               |
| <i>Cd109</i>         | NM_153098.2          | CD109 antigen (Cd109)                                                                                       | 1.56               |
| <i>Cd59a</i>         | NM_007652.2          | CD59a antigen (Cd59a)                                                                                       | 1.72               |
| <i>Cdkn1a</i>        | NM_007669.2          | cyclin-dependent kinase inhibitor 1A (P21) (Cdkn1a)                                                         | 1.51               |
| <i>Chchd10</i>       | NM_175329.3          | coiled-coil-helix-coiled-coil-helix domain containing 10 (Chchd10)                                          | 2.96               |
| <i>Cln3</i>          | NM_009907.2          | ceroid lipofuscinosis, neuronal 3, juvenile (Batten, Spielmeyer-Vogt disease) (Cln3)                        | 1.70               |
| <i>Col5a1</i>        | NM_015734.1          | procollagen, type V, alpha 1 (Col5a1)                                                                       | 2.20               |
| <i>Cox6b2</i>        | NM_183405.1          | cytochrome c oxidase subunit VIb polypeptide 2 (Cox6b2)                                                     | 1.74               |
| <i>Cp</i>            | NM_007752            |                                                                                                             | 1.84               |
| <i>Csf1</i>          | NM_007778.3          | colony stimulating factor 1 (macrophage) (Csf1)                                                             | 1.50               |
| <i>Ctsa</i>          | NM_001038492.1       | cathepsin A (Ctsa), transcript variant 2                                                                    | 2.59               |
| <i>Cyb5</i>          | NM_025797.3          | cytochrome b-5 (Cyb5)                                                                                       | 1.56               |
| <i>Cyld</i>          | NM_173369.1          | cyliindromatosis (turban tumor syndrome) (Cyld)                                                             | 1.50               |
| <i>Dcxr</i>          | NM_026428.1          | dicarbonyl L-xylulose reductase (Dcxr)                                                                      | 1.63               |
| <i>Dock6</i>         | NM_177030.3          | dedicator of cytokinesis 6 (Dock6)                                                                          | 1.96               |
| <i>E430002G05Rik</i> | NM_173749            |                                                                                                             | 2.16               |
| <i>EG433229</i>      | XM_899874.3          | PREDICTED: predicted gene, EG433229, transcript variant 7 (EG433229)                                        | 1.57               |
| <i>EG665378</i>      | NM_001081746.1       | predicted gene, EG665378 (EG665378)                                                                         | 1.60               |
| <i>Fzd10</i>         | NM_175284.3          | frizzled homolog 10 (Drosophila) (Fzd10)                                                                    | 1.50               |
| <i>Gcat</i>          | NM_013847            |                                                                                                             | 1.79               |
| <i>Gdpd5</i>         | NM_201352.2          | glycerophosphodiester phosphodiesterase domain containing 5 (Gdpd5)                                         | 1.52               |
| <i>Gpx4</i>          | NM_001037741.2       | glutathione peroxidase 4 (Gpx4), transcript variant 1                                                       | 1.66               |
| <i>Gria3</i>         | NM_016886.2          | glutamate receptor, ionotropic, AMPA3 (alpha 3) (Gria3)                                                     | 1.65               |
| <i>Gtse1</i>         | NM_013882.1          | G two S phase expressed protein 1 (Gtse1)                                                                   | 1.57               |
| <i>H2-K1</i>         | NM_001001892.2       | histocompatibility 2, K1, K region (H2-K1), transcript variant 1                                            | 1.71               |
| <i>Hdc</i>           | NM_008230.4          | histidine decarboxylase (Hdc)                                                                               | 1.66               |
| <i>Herpud1</i>       | NM_022331.1          | homocysteine-inducible, endoplasmic reticulum stress-inducible, ubiquitin-like domain member 1 (Herpud1)    | 1.89               |
| <i>Hist1h1c</i>      | NM_015786            |                                                                                                             | 1.67               |
| <i>Hist1h4a</i>      | NM_178192.1          | histone cluster 1, H4a (Hist1h4a)                                                                           | 1.76               |
| <i>Hist1h4j</i>      | NM_178210.1          | histone cluster 1, H4j (Hist1h4j)                                                                           | 1.57               |
| <i>Ifit3</i>         | NM_010501.2          | interferon-induced protein with tetratricopeptide repeats 3 (Ifit3)                                         | 1.51               |
| <i>Ifitm1</i>        | NM_026820.2          | interferon induced transmembrane protein 1 (Ifitm1)                                                         | 1.74               |
| <i>Igfbp1</i>        | NM_018741.2          | insulin-like growth factor binding protein-like 1 (Igfbp1)                                                  | 1.66               |
| <i>Il11ra1</i>       | NM_010549.2          | interleukin 11 receptor, alpha chain 1 (Il11ra1)                                                            | 1.72               |
| <i>Ivns1abp</i>      | NM_054102.2          | influenza virus NS1A binding protein (Ivns1abp), transcript variant 2                                       | 1.52               |
| <i>Kndc1</i>         | NM_177261.4          | kinase non-catalytic C-lobe domain (KIND) containing 1 (Kndc1)                                              | 1.91               |
| <i>Lbp</i>           | NM_008489.2          | lipopolysaccharide binding protein (Lbp)                                                                    | 2.41               |
| <i>Lcn2</i>          | NM_008491.1          | lipocalin 2 (Lcn2)                                                                                          | 11.25              |
| <i>Lgals3</i>        | NM_010705.2          | lectin, galactose binding, soluble 3 (Lgals3)                                                               | 2.46               |
| <i>LOC100039346</i>  | XM_001472500.1       | PREDICTED: hypothetical protein LOC100039346 (LOC100039346)                                                 | 1.54               |
| <i>LOC100039751</i>  | XR_031048.1          | PREDICTED: similar to 40S ribosomal protein S12 (LOC100039751), misc RNA.                                   | 1.64               |
| <i>LOC100042427</i>  | XM_001478518.1       | PREDICTED: similar to Glyceraldehyde-3-phosphate dehydrogenase (GAPDH), transcript variant 4 (LOC100042427) | 1.53               |

|                           |                |                                                                                    |      |
|---------------------------|----------------|------------------------------------------------------------------------------------|------|
| <i>LOC100044948</i>       | XM_001473652.1 | PREDICTED: similar to macrophage migration inhibitory factor (LOC100044948)        | 1.91 |
| <i>LOC100047856</i>       | XM_001479297.1 | PREDICTED: similar to calponin 3, acidic (LOC100047856)                            | 1.63 |
| <i>LOC226017</i>          | XM_129164.2    |                                                                                    | 1.76 |
| <i>LOC383712</i>          | XM_911155.2    | PREDICTED: similar to putative translation initiation factor A121/Sui1 (LOC383712) | 1.50 |
| <i>LOC665235</i>          | XR_031650.1    | PREDICTED: similar to hCG1642689 (LOC665235), misc RNA.                            | 1.74 |
| <i>Lrp2</i>               | NM_001081088.1 | low density lipoprotein receptor-related protein 2 (Lrp2)                          | 1.81 |
| <i>Mdh1</i>               | NM_008618.2    | malate dehydrogenase 1, NAD (soluble) (Mdh1)                                       | 1.55 |
| <i>Mgst1</i>              | NM_019946.4    | microsomal glutathione S-transferase 1 (Mgst1)                                     | 1.71 |
| <i>Mif</i>                | NM_010798.2    | macrophage migration inhibitory factor (Mif)                                       | 1.87 |
| <i>Nbl1</i>               | NM_008675.1    | neuroblastoma, suppression of tumorigenicity 1 (Nbl1)                              | 1.86 |
| <i>Ndufb10</i>            | XM_128594.4    |                                                                                    | 1.51 |
| <i>Nuak2</i>              | NM_028778.3    | NUAK family, SNF1-like kinase, 2 (Nuak2)                                           | 1.64 |
| <i>Osbp15</i>             | NM_024289      |                                                                                    | 1.71 |
| <i>OTTMUSG00000025408</i> | NR_003564.1    | predicted gene, OTTMUSG00000025408 (OTTMUSG00000025408), non-coding RNA.           | 2.74 |
| <i>Phlda3</i>             | NM_013750.1    | pleckstrin homology-like domain, family A, member 3 (Phlda3)                       | 1.56 |
| <i>Pltp</i>               | NM_011125.2    | phospholipid transfer protein (Pltp)                                               | 1.55 |
| <i>Por</i>                | NM_008898.1    | P450 (cytochrome) oxidoreductase (Por)                                             | 1.58 |
| <i>Ppib</i>               | NM_011149.2    | peptidylprolyl isomerase B (Ppib)                                                  | 1.53 |
| <i>Pqlc3</i>              | NM_172574.1    | PQ loop repeat containing (Pqlc3)                                                  | 1.71 |
| <i>Pramel4</i>            | NM_178248.2    | preferentially expressed antigen in melanoma like 4 (Pramel4)                      | 1.51 |
| <i>Prelp</i>              | NM_054077.3    | proline arginine-rich end leucine-rich repeat (Prelp)                              | 2.88 |
| <i>Prodh</i>              | NM_011172.1    |                                                                                    | 1.58 |
| <i>Pros1</i>              | NM_011173.2    | protein S (alpha) (Pros1)                                                          | 1.58 |
| <i>Rarres2</i>            | NM_027852.1    | retinoic acid receptor responder (tazarotene induced) 2 (Rarres2)                  | 1.65 |
| <i>Serpinb6a</i>          | NM_009254.2    | serine (or cysteine) peptidase inhibitor, clade B, member 6a (Serpinb6a)           | 1.52 |
| <i>Serping1</i>           | NM_009776      |                                                                                    | 1.55 |
| <i>Shroom3</i>            | NM_001077596.1 | shroom family member 3 (Shroom3), transcript variant 3                             | 1.65 |
| <i>Siva1</i>              | NM_013929.1    | SIVA1, apoptosis-inducing factor (Siva1)                                           | 1.54 |
| <i>Slc19a2</i>            | NM_054087.2    | solute carrier family 19 (thiamine transporter), member 2 (Slc19a2)                | 1.61 |
| <i>Slc2a1</i>             | NM_011400.2    | solute carrier family 2 (facilitated glucose transporter), member 1 (Slc2a1)       | 2.33 |
| <i>Slc46a3</i>            | NM_027872.3    | solute carrier family 46, member 3 (Slc46a3)                                       | 1.52 |
| <i>Snta1</i>              | NM_009228.1    | syntrophin, acidic 1 (Snta1)                                                       | 1.55 |
| <i>Spag6</i>              | NM_015773.1    | sperm associated antigen 6 (Spag6)                                                 | 1.82 |
| <i>Tap2</i>               | NM_011530.2    | transporter 2, ATP-binding cassette, sub-family B (MDR/TAP) (Tap2)                 | 1.65 |
| <i>Tpi1</i>               | NM_009415.1    | triosephosphate isomerase 1 (Tpi1)                                                 | 1.60 |
| <i>Usp53</i>              | NM_133857.3    | ubiquitin specific peptidase 53 (Usp53)                                            | 1.77 |
| <i>Vegfb</i>              | NM_011697.2    | vascular endothelial growth factor B (Vegfb)                                       | 1.50 |
| <i>Xbp1</i>               | NM_013842.2    | X-box binding protein 1 (Xbp1)                                                     | 1.57 |
