# Supplementary material for: miR-30 Family miRNAs Mediate the Effect of Chronic Social Defeat Stress on Hippocampal Neurogenesis in Mouse Depression Model
Source: PubMed Central journal article supplement (PMC6694739; doi:10.3389/fnmol.2019.00188), 2019-08-08
Supplement: Table_12.pdf [file Table_12.pdf]

**Table S12. List of genes, which demonstrated decreased expression (fold change  $\geq 1.5$  and  $p \leq 0.05$ ) in the differentiated cells from the late phase (day 7) when compared with the differentiated cells from an early phase (day 2)**

| <b>Gene Symbol</b> | <b>Accession No.</b> | <b>Gene Definition</b>                                                                                                         | <b>Fold Change</b> |
|--------------------|----------------------|--------------------------------------------------------------------------------------------------------------------------------|--------------------|
| 1110003F05Rik      |                      |                                                                                                                                | 0.65               |
| 1190002H23Rik      | NM_025427.2          | RIKEN cDNA 1190002H23 gene (1190002H23Rik)                                                                                     | 0.57               |
| 1200009O22Rik      | NM_025817.3          | RIKEN cDNA 1200009O22 gene (1200009O22Rik)                                                                                     | 0.57               |
| 1700019G17Rik      | NM_029331.2          | RIKEN cDNA 1700019G17 gene (1700019G17Rik)                                                                                     | 0.66               |
| 2210408F11Rik      |                      |                                                                                                                                | 0.66               |
| 2810402K13Rik      |                      |                                                                                                                                | 0.65               |
| 2900062L11Rik      | NR_003642.1          | RIKEN cDNA 2900062L11 gene (2900062L11Rik), non-coding RNA.                                                                    | 0.60               |
| 6330403K07Rik      | NM_134022.2          | RIKEN cDNA 6330403K07 gene (6330403K07Rik)                                                                                     | 0.56               |
| 6430537F04         |                      |                                                                                                                                | 0.61               |
| A230057G18Rik      | XM_489103            |                                                                                                                                | 0.51               |
| Aard               | NM_175503.3          | alanine and arginine rich domain containing protein (Aard)                                                                     | 0.61               |
| Abhd1              | NR_003522.1          | abhydrolase domain containing 1 (Abhd1), transcribed RNA.                                                                      | 0.66               |
| Adamts12           | NM_175501            |                                                                                                                                | 0.51               |
| Adamts9            |                      |                                                                                                                                | 0.51               |
| Agt                | NM_007428.3          | angiotensinogen (serpin peptidase inhibitor, clade A, member 8) (Agt)                                                          | 0.48               |
| Al481316           | XM_148986.1          |                                                                                                                                | 0.65               |
| B3gat1             | NM_029792.1          | beta-1,3-glucuronyltransferase 1 (glucuronosyltransferase P) (B3gat1)                                                          | 0.50               |
| Bcan               | NM_007529.1          | brevican (Bcan)                                                                                                                | 0.48               |
| Brp17              | NM_019999.1          |                                                                                                                                | 0.62               |
| C530008M17Rik      | XM_916109.2          | PREDICTED: RIKEN cDNA C530008M17 gene, transcript variant 3 (C530008M17Rik)                                                    | 0.54               |
| C630002C17Rik      | AK049826             |                                                                                                                                | 0.62               |
| Camk2b             | NM_007595.3          | calcium/calmodulin-dependent protein kinase II, beta (Camk2b)                                                                  | 0.49               |
| Cav1               | NM_007616.3          | caveolin 1, caveolae protein (Cav1)                                                                                            | 0.49               |
| Cd1d1              | NM_007639.2          | CD1d1 antigen (Cd1d1)                                                                                                          | 0.66               |
| Cdh13              | NM_019707.4          | cadherin 13 (Cdh13)                                                                                                            | 0.57               |
| Cdk5r1             | NM_009871.2          | cyclin-dependent kinase 5, regulatory subunit 1 (p35) (Cdk5r1)                                                                 | 0.64               |
| Cfl1               | NM_007687.2          | cofilin 1, non-muscle (Cfl1)                                                                                                   | 0.65               |
| Chrna4             | NM_015730.4          | cholinergic receptor, nicotinic, alpha polypeptide 4 (Chrna4)                                                                  | 0.59               |
| Clk1               | NM_001042634.1       | CDC-like kinase 1 (Clk1), transcript variant 1                                                                                 | 0.57               |
| Col4a1             | NM_009931.1          | procollagen, type IV, alpha 1 (Col4a1)                                                                                         | 0.55               |
| Cpxm1              | NM_019696.1          | carboxypeptidase X 1 (M14 family) (Cpxm1)                                                                                      | 0.55               |
| D0H4S114           | NM_053078.3          | DNA segment, human D4S114 (D0H4S114)                                                                                           | 0.51               |
| Ddah1              | NM_026993            |                                                                                                                                | 0.53               |
| Dgkb               | NM_178681            |                                                                                                                                | 0.65               |
| Dpysl4             | NM_011993.2          | dihydropyrimidinase-like 4 (Dpysl4)                                                                                            | 0.65               |
| E030030K01Rik      | AK087162             |                                                                                                                                | 0.54               |
| EG232599           | NM_177689.3          | predicted gene, EG232599 (EG232599)                                                                                            | 0.59               |
| Egr3               | NM_018781            |                                                                                                                                | 0.60               |
| Elmo1              | NM_198093.2          | engulfment and cell motility 1, ced-12 homolog (C. elegans) (Elmo1), transcript variant 2                                      | 0.61               |
| Ephb1              | NM_173447.2          | Eph receptor B1 (Ephb1)                                                                                                        | 0.52               |
| F2r                | NM_010169.3          | coagulation factor II (thrombin) receptor (F2r)                                                                                | 0.66               |
| Fam171b            | NM_175514.2          | family with sequence similarity 171, member B (Fam171b)                                                                        | 0.50               |
| Fxyd6              | NM_022004.6          | FXYD domain-containing ion transport regulator 6 (Fxyd6)                                                                       | 0.38               |
| Gamt               | NM_010255.1          | guanidinoacetate methyltransferase (Gamt)                                                                                      | 0.52               |
| Gldc               | NM_138595.1          | glycine decarboxylase (Gldc)                                                                                                   | 0.57               |
| Gria2              | NM_013540            |                                                                                                                                | 0.46               |
| Hr                 | NM_021877.2          | hairless (Hr)                                                                                                                  | 0.56               |
| ldb2               | AK013239             |                                                                                                                                | 0.61               |
| Igfbp4             | NM_010517.2          |                                                                                                                                | 0.55               |
| Kcna6              | NM_013568.3          |                                                                                                                                | 0.63               |
| Kcnd2              | NM_019697.3          | potassium voltage-gated channel, Shal-related family, member 2 (Kcnd2)                                                         | 0.62               |
| Kctd5              | NM_027008.1          | potassium channel tetramerisation domain containing 5 (Kctd5)                                                                  | 0.57               |
| Ky                 | NM_024291.3          | kyphoscoliosis peptidase (Ky)                                                                                                  | 0.62               |
| Lgals8             | NM_018886.3          | lectin, galactose binding, soluble 8 (Lgals8)                                                                                  | 0.64               |
| LOC100041388       | XM_001476627.1       | PREDICTED: similar to ORF1 (LOC100041388)                                                                                      | 0.66               |
| LOC100047606       | XR_033719.1          | PREDICTED: similar to neurotrophic tyrosine kinase, receptor, type 3 (LOC100047606), misc RNA.                                 | 0.64               |
| LOC100047619       | XR_033736.1          | PREDICTED: similar to solute carrier family 7 (cationic amino acid transporter, y+ system), member 5 (LOC100047619), misc RNA. | 0.59               |
| LOC386199          | XM_359116.1          |                                                                                                                                | 0.62               |
| Lpl                | NM_008509.2          | lipoprotein lipase (Lpl)                                                                                                       | 0.55               |
| Mest               | NM_008590.1          | mesoderm specific transcript (Mest)                                                                                            | 0.46               |
| Mfge8              | NM_001045489.1       | milk fat globule-EGF factor 8 protein (Mfge8), transcript variant 2                                                            | 0.57               |
| mKIAA0282          | AK129109             |                                                                                                                                | 0.53               |
| Mmd2               | NM_175217.6          | monocyte to macrophage differentiation-associated 2 (Mmd2)                                                                     | 0.61               |
| Myh8               | NM_177369.3          | myosin, heavy polypeptide 8, skeletal muscle, perinatal (Myh8)                                                                 | 0.46               |

|                       |                |                                                                                                        |      |
|-----------------------|----------------|--------------------------------------------------------------------------------------------------------|------|
| <i>Nav1</i>           | NM_173437.1    | neuron navigator 1 (Nav1)                                                                              | 0.65 |
| <i>Ncam1</i>          | NM_010875.3    | neural cell adhesion molecule 1 (Ncam1), transcript variant 2                                          | 0.57 |
| <i>Ncan</i>           | NM_007789.2    | neurocan (Ncan)                                                                                        | 0.43 |
| <i>Neo1</i>           | NM_008684.1    |                                                                                                        | 0.64 |
| <i>Neto2</i>          | NM_001081324.1 | neuroligin (NRP) and tolloid (TLL)-like 2 (Neto2)                                                      | 0.66 |
| <i>Nfia</i>           | NM_177176.2    |                                                                                                        | 0.66 |
| <i>Olig1</i>          | NM_016968.4    | oligodendrocyte transcription factor 1 (Olig1)                                                         | 0.58 |
| <i>Omg</i>            | NM_019409.1    | oligodendrocyte myelin glycoprotein (Omg)                                                              | 0.52 |
| <i>P2ry1</i>          | NM_008772.4    | purinergic receptor P2Y, G-protein coupled 1 (P2ry1)                                                   | 0.65 |
| <i>Pde1b</i>          | NM_008800      |                                                                                                        | 0.66 |
| <i>Pdzrn3</i>         | NM_018884.1    | PDZ domain containing RING finger 3 (Pdzrn3)                                                           | 0.62 |
| <i>Phf19</i>          | NM_028716.1    | PHD finger protein 19 (Phf19)                                                                          | 0.66 |
| <i>Plekha4</i>        | NM_148927.1    | pleckstrin homology domain containing, family A (phosphoinositide binding specific) member 4 (Plekha4) | 0.41 |
| <i>Ppic</i>           | NM_008908.3    | peptidylprolyl isomerase C (Ppic)                                                                      | 0.65 |
| <i>Prkcb</i>          | NM_008855.2    | protein kinase C, beta (Prkcb)                                                                         | 0.60 |
| <i>Ptn</i>            | NM_008973.2    | pleiotrophin (Ptn)                                                                                     | 0.52 |
| <i>Ptprz1</i>         | XM_988289.1    | PREDICTED: protein tyrosine phosphatase, receptor type Z, polypeptide 1, transcript variant 3 (Ptprz1) | 0.22 |
| <i>Reep3</i>          | NM_178606.4    | receptor accessory protein 3 (Reep3)                                                                   | 0.60 |
| <i>Scara3</i>         | NM_172604.3    | scavenger receptor class A, member 3 (Scara3)                                                          | 0.61 |
| <i>Scara5</i>         | NM_028903.1    | scavenger receptor class A, member 5 (putative) (Scara5)                                               | 0.62 |
| <i>Scd4</i>           | NM_183216.3    | stearoyl-coenzyme A desaturase 4 (Scd4)                                                                | 0.46 |
| <i>Scgb1c1</i>        | NM_001099742.1 | secretoglobin, family 1C, member 1 (Scgb1c1)                                                           | 0.66 |
| <i>scl0002255.1_1</i> | AK017012.1     |                                                                                                        | 0.58 |
| <i>Slc24a3</i>        | NM_053195.2    | solute carrier family 24 (sodium/potassium/calcium exchanger), member 3 (Slc24a3)                      | 0.42 |
| <i>Slc44a1</i>        | NM_133891.2    | solute carrier family 44, member 1 (Slc44a1)                                                           | 0.56 |
| <i>Sox8</i>           | NM_011447.1    | SRY-box containing gene 8 (Sox8)                                                                       | 0.64 |
| <i>Specc1</i>         | NM_001029936.2 | sperm antigen with calponin homology and coiled-coil domains 1 (Specc1)                                | 0.64 |
| <i>Svep1</i>          | NM_022814.2    | sushi, von Willebrand factor type A, EGF and pentraxin domain containing 1 (Svep1)                     | 0.58 |
| <i>Tnfrsf21</i>       | NM_178589.2    | tumor necrosis factor receptor superfamily, member 21 (Tnfrsf21)                                       | 0.43 |
| <i>Trib2</i>          | NM_144551.3    |                                                                                                        | 0.65 |
| <i>Tspan7</i>         | NM_019634.2    | tetraspanin 7 (Tspan7)                                                                                 | 0.54 |
| <i>Ttyh3</i>          | NM_175274.3    | tweety homolog 3 (Drosophila) (Ttyh3)                                                                  | 0.46 |
| <i>Wsb1</i>           | NM_001042565.2 | WD repeat and SOCS box-containing 1 (Wsb1), transcript variant 2                                       | 0.56 |
